# Supplementary material for: Syntheses of functionalized benzocoumarins by photoredox catalysis
Source: Royal Society of Chemistry journal article supplement (doi:10.1039/d2ob02225g), 2023-01-01

# Supporting Information

## Syntheses of Functionalized Benzocoumarins by Photoredox Catalysis

Qihong Lai,<sup>a</sup> Shanyi Chen,<sup>a</sup> Jiajun Fan,<sup>a</sup> Linnan Zou,<sup>a</sup> Shuling Huang,<sup>a</sup> Lailing Fu,<sup>a</sup>

Lina Cai<sup>\*a</sup> and Shunyou Cai<sup>\*a,b</sup>

<sup>a</sup> Fujian Provincial Key Laboratory of Modern Analytical Science and Separation Technology, School of Chemistry, Chemical Engineering and Environment, Minnan Normal University, Zhangzhou, 363000, China.

<sup>b</sup> Guangdong Provincial Key Laboratory of Chemical Genomics, Shenzhen Graduate School, Peking University, Shenzhen, 518055, China.

E-mail: [caishy05@mnnu.edu.cn](mailto:caishy05@mnnu.edu.cn); [cln1855@mnnu.edu.cn](mailto:cln1855@mnnu.edu.cn)

### Table of Contents

(109 Pages)

|                                                                                                           |     |
|-----------------------------------------------------------------------------------------------------------|-----|
| Materials and methods                                                                                     | S2  |
| General procedure for synthesis of 6 <i>H</i> -benzo[ <i>c</i> ]chromen-6-ones                            | S3  |
| <sup>1</sup> H, <sup>13</sup> C and <sup>19</sup> F spectra data of compounds <b>2a-2q</b> , <b>4a-4t</b> | S3  |
| Late-stage functionalization of substances derived from natural products                                  | S21 |
| <sup>1</sup> H and <sup>13</sup> C spectra data of compounds <b>5-17</b>                                  | S21 |
| Synthetic applications                                                                                    | S29 |
| <sup>1</sup> H, <sup>13</sup> C and <sup>19</sup> F spectra data of compounds <b>18-22</b>                | S29 |
| Synthesis of benzocoumarins from peroxide, alcohol, aldehyde, carbonyl acid                               | S32 |
| <sup>1</sup> H, <sup>13</sup> C and <sup>19</sup> F spectra data of compounds <b>23-26</b>                | S32 |
| UV-Vis absorption experiments                                                                             | S34 |
| Fluorescence quenching experiments                                                                        | S35 |
| CV curve of the substrate <b>1a</b>                                                                       | S37 |
| In-situ NMR spectroscopic experiments                                                                     | S38 |
| High-resolution mass spectrum analysis of the reaction mixture                                            | S39 |
| Copies of <sup>1</sup> H NMR, <sup>13</sup> C NMR, <sup>19</sup> F NMR and HRMS spectra                   | S41 |

## Materials and methods

All the chemicals were purchased commercially, and used without further purification. Thin-layer chromatography (TLC) was conducted with 0.25 mm Tsingdao silica gel plates (60F-254) and visualized by exposure to UV light (254 nm) or stained with phosphomolybdic acid. Flash column chromatography was performed using Tsingdao silica gel (60, particle size 0.040-0.063 mm). Reagents were purchased at the highest commercial quality and used without further purification, unless otherwise stated.  $^1\text{H}$  NMR spectra were recorded on JEOL spectrometers (at 400 MHz) and were reported relative to deuterated solvent signals. Data for  $^1\text{H}$  NMR spectra were reported as follows: chemical shift ( $\delta$  ppm), multiplicity, coupling constant (Hz) and integration.  $^{13}\text{C}$  NMR spectra were recorded on JEOL Spectrometers (at 100 MHz). Data for  $^{13}\text{C}$  NMR spectra were reported in terms of chemical shift. Mass spectrometric data were obtained using Bruker Apex IV RTMS. The following abbreviations were used to explain the multiplicities: s = singlet, d = doublet, t = triplet, q = quartet, m = multiplet, br = broad.

### General procedure for synthesis of 6*H*-benzo[*c*]chromen-6-ones

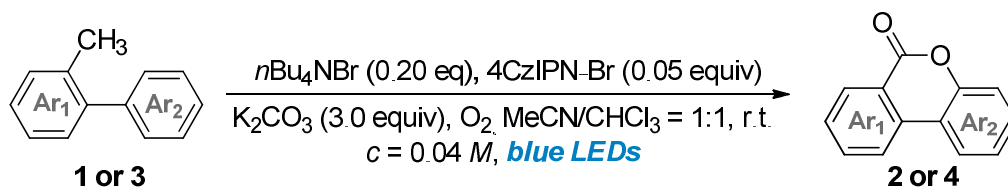

**Condition A:** A flame-dried reaction tube was equipped with magnetic stir bar and charged with 2-methyl-1,1'-biphenyl **1** or **3** (0.0416 mmol, 1.0 equiv), *n*Bu<sub>4</sub>NBr (0.0083 mmol, 0.2 equiv), 4CzIPN-Br (0.0021 mmol, 0.05 equiv), K<sub>2</sub>CO<sub>3</sub> (0.1248 mmol, 3.0 equiv) and MeCN/CHCl<sub>3</sub> (1:1).

**Condition B:** A flame-dried reaction tube was equipped with magnetic stir bar and charged with 2-methyl-1,1'-biphenyl **1** (0.0416 mmol, 1.0 equiv), *n*Bu<sub>4</sub>NBr (0.0166 mmol, 0.4 equiv), 2-BrAQ (0.0017 mmol, 0.04 equiv), KF (0.1248 mmol, 3.0 equiv) and MeCN/CF<sub>3</sub>CH<sub>2</sub>OH (1:1).

Then, the reaction mixture was irradiated by blue LEDs (12 W, wavelength 450 nm) under a balloon oxygen atmosphere at room temperature until the starting material disappeared from the TLC. After that, the reaction mixture was directly concentrated under reduced pressure and the crude residue was purified by silica gel column chromatography using hexane/EtOAc (*v/v* = 6/1) to afford the desired pure product **2-4** in 29-89% yields. (The substrates **1d**, **1e** and **1o** were carried out under the condition B.)

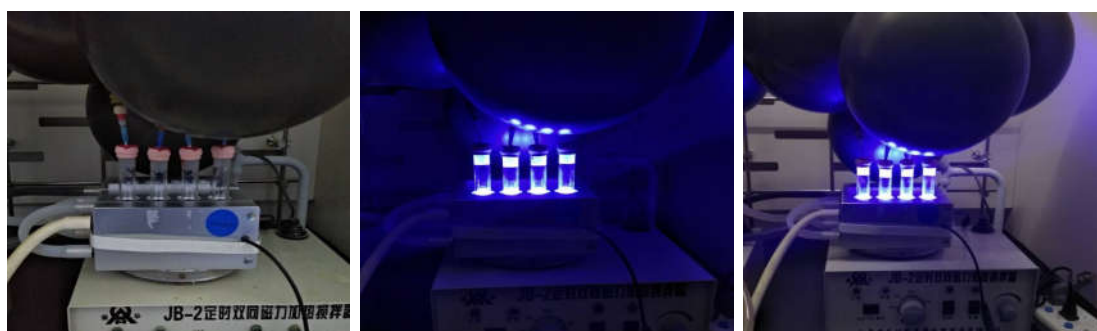

### <sup>1</sup>H, <sup>13</sup>C and <sup>19</sup>F spectra data of compounds **2a-2q**, **4a-4t**

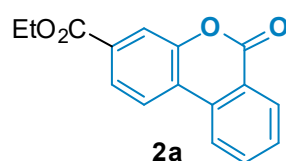

**ethyl 6-oxo-6H-benzo[c]chromene-3-carboxylate (2a):**  $^1\text{H}$  NMR (400 MHz,  $\text{CDCl}_3$ )  $\delta$  8.46-8.44 (d,  $J = 7.2$  Hz, 1H), 8.20-8.18 (d,  $J = 8.4$  Hz, 1H), 8.15-8.13 (d,  $J = 8.4$  Hz, 1H), 8.03-8.00 (m, 2H), 7.91-7.87 (m, 1H), 7.69-7.86 (t,  $J = 7.2$  Hz, 1H), 4.46-4.41 (q,  $J = 7.2$  Hz, 2H), 1.46-1.42 (t,  $J = 7.6$  Hz, 3H);  $^{13}\text{C}$  NMR (100 MHz,  $\text{CDCl}_3$ )  $\delta$  165.4, 160.7, 151.0, 135.1, 133.8, 132.3, 130.8, 130.1, 125.3, 122.9, 122.5, 121.9, 121.8, 119.1, 61.7, 14.4. These data are consistent with literature values, see: Y. Li, Y. Ding, J. Wang, Y. Su, X. Wang, *Org. Lett.*, 2013, **15**, 2574. (White solid, 17.6 mg, 77% isolated yield)

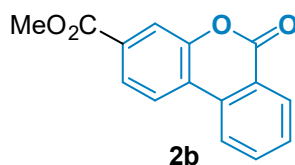

**methyl 6-oxo-6H-benzo[c]chromene-3-carboxylate (2b):**  $^1\text{H}$  NMR (400 MHz,  $\text{CDCl}_3$ )  $\delta$  8.45-8.43 (dd,  $J_1 = 0.8$  Hz,  $J_2 = 7.6$  Hz, 1H), 8.19-8.13 (m, 2H), 8.02-7.99 (m, 2H), 7.90-7.89 (m, 1H), 7.69-7.67 (m, 1H), 3.98 (s, 3H);  $^{13}\text{C}$  NMR (100 MHz,  $\text{CDCl}_3$ )  $\delta$  165.9, 160.8, 151.0, 135.2, 133.8, 131.9, 130.9, 130.1, 125.4, 123.0, 122.5, 122.0, 121.8, 119.2, 52.7. These data are consistent with literature values, see: C. Pan, L. Wang and J. Han, *Org. Lett.*, 2020, **22**, 4776. (White solid, 14.4 mg, 62% isolated yield)

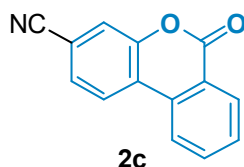

**6-oxo-6H-benzo[c]chromene-3-carbonitrile (2c):**  $^1\text{H}$  NMR (400 MHz,  $\text{CDCl}_3$ )  $\delta$  8.47-8.45 (m, 1H), 8.20-8.16 (m, 2H), 7.95-7.91 (m, 1H), 7.75-7.71 (m, 1H), 7.68-7.67 (d,  $J = 1.6$  Hz, 1H), 7.64-7.62 (dd,  $J_1 = 1.6$  Hz,  $J_2 = 8.0$  Hz, 1H);  $^{13}\text{C}$  NMR



(100 MHz, CDCl<sub>3</sub>)  $\delta$  159.9, 151.0, 135.5, 133.0, 131.1, 130.8, 127.8, 124.0, 122.5, 122.4, 121.9, 121.8, 117.7, 113.6. These data are consistent with literature values, see: Y. Wang, A. V. Gulevich, V. Gevorgyan, *Chem. Eur. J.*, 2013, **19**, 15836. (White solid, 14.5 mg, 63% isolated yield)

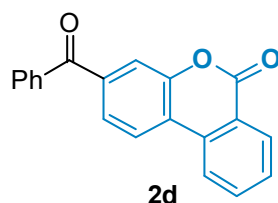

**3-benzoyl-6H-benzo[c]chromen-6-one (2d):** <sup>1</sup>H NMR (400 MHz, CDCl<sub>3</sub>)  $\delta$  8.47-8.45 (dd,  $J_1 = 0.8$  Hz,  $J_2 = 8.0$  Hz, 1H), 8.22-8.20 (m, 2H), 7.93-7.88 (m, 1H), 7.86-7.78 (m, 4H), 7.71-7.63 (m, 2H), 7.55-7.51 (m, 2H); <sup>13</sup>C NMR (100 MHz, CDCl<sub>3</sub>)  $\delta$  195.0, 160.8, 150.9, 139.1, 137.0, 135.2, 133.9, 133.1, 130.9, 130.1, 128.6, 127.2, 125.8, 123.1, 122.5, 121.8, 121.5, 119.8; HRMS calculated for C<sub>20</sub>H<sub>13</sub>O<sub>3</sub> (M + H<sup>+</sup>): 301.0865, found: 301.0860. (White solid, 10.8 mg, 49% isolated yield)

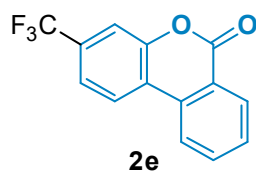

**3-(trifluoromethyl)-6H-benzo[c]chromen-6-one (2e):** <sup>1</sup>H NMR (400 MHz, CDCl<sub>3</sub>)  $\delta$  8.47-8.45 (dd,  $J_1 = 1.2$  Hz,  $J_2 = 8.0$  Hz, 1H), 8.22-8.18 (t,  $J = 8.0$  Hz, 2H), 7.93-7.89 (m, 1H), 7.72-7.59 (m, 3H), 7.46-7.43 (t,  $J = 7.6$  Hz, 1H); <sup>13</sup>C NMR (100 MHz, CDCl<sub>3</sub>)  $\delta$  160.4, 151.1, 135.3, 133.5, 132.5, 132.2, 131.0, 130.2, 124.7, 123.7, 122.3, 122.0, 121.8, 121.2, 121.1, 115.4, 115.3; <sup>19</sup>F NMR (376 MHz, CDCl<sub>3</sub>)  $\delta$  -62.68. These data are consistent with literature values, see: Y. Li, Y. Ding, J. Wang, Y. Su, X. Wang, *Org. Lett.*, 2013, **15**, 2574. (White solid, 11.3 mg, 50% isolated yield)

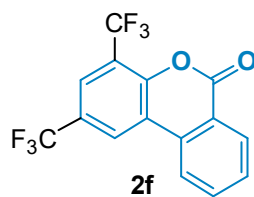

**2,4-bis(trifluoromethyl)-6H-benzo[c]chromen-6-one (2f):**  $^1\text{H}$  NMR (400 MHz,  $\text{CDCl}_3$ )  $\delta$  8.53-8.46 (m, 2H), 8.22-8.20 (d,  $J = 8.0$  Hz, 1H), 8.03 (s, 1H), 7.98-7.94 (m, 1H), 7.78-7.72 (m, 1H);  $^{13}\text{C}$  NMR (100 MHz,  $\text{CDCl}_3$ )  $\delta$  158.4, 150.7, 135.8, 133.8, 132.6, 131.6, 131.5, 131.2, 130.9, 128.9, 128.8, 126.7, 126.4, 124.7, 124.5, 124.2, 123.4, 122.2, 121.8, 121.1, 120.6, 120.5, 120.2, 120.1;  $^{19}\text{F}$  NMR (376 MHz,  $\text{CDCl}_3$ )  $\delta$  -62.04, -62.74. These data are consistent with literature values, see: Y. Wang, A. V. Gulevich, V. Gevorgyan, *Chem. Eur. J.*, 2013, **19**, 15836. (White solid, 11.3 mg, 53% isolated yield)

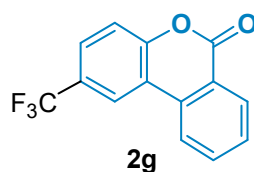

**2-(trifluoromethyl)-6H-benzo[c]chromen-6-one (2g):**  $^1\text{H}$  NMR (400 MHz,  $\text{CDCl}_3$ )  $\delta$  8.46-8.44 (dd,  $J_1 = 0.8$  Hz,  $J_2 = 8.0$  Hz, 1H), 8.30-8.28 (d,  $J = 8.4$  Hz, 1H), 8.17-8.15 (d,  $J = 8.0$  Hz, 1H), 7.91-7.87 (m, 1H), 7.80-7.79 (d,  $J = 7.6$  Hz, 1H), 7.69-7.65 (m, 1H), 7.46-7.42 (t,  $J = 8.0$  Hz, 1H);  $^{13}\text{C}$  NMR (100 MHz,  $\text{CDCl}_3$ )  $\delta$  160.4, 153.2, 135.4, 133.6, 130.9, 130.0, 127.2, 127.1, 126.9, 125.2, 122.5, 122.0, 121.3, 120.6, 120.5, 118.6, 118.5, 116.5;  $^{19}\text{F}$  NMR (376 MHz,  $\text{CDCl}_3$ )  $\delta$  -61.63. These data are consistent with literature values, see: Z. Luo, Z.-H. Gao, Z.-Y. Song, Y.-F. Han and S. Ye, *Org. Biomol. Chem.*, 2019, **17**, 4212. (White solid, 10.0 mg, 44% isolated yield)

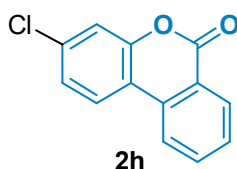

**3-chloro-6H-benzo[c]chromen-6-one (2h):**  $^1\text{H}$  NMR (400 MHz,  $\text{CDCl}_3$ )  $\delta$  8.38-8.36 (dd,  $J_1 = 0.8$  Hz,  $J_2 = 8.0$  Hz, 1H), 8.06-8.04 (d,  $J = 7.6$  Hz, 1H), 7.97-7.95 (d,  $J = 8.4$  Hz, 1H), 7.85-7.81 (m, 1H), 7.62-7.57 (m, 1H), 7.35-7.34 (d,  $J = 2.0$  Hz, 1H), 7.32-7.29 (m, 1H);  $^{13}\text{C}$  NMR (100 MHz,  $\text{CDCl}_3$ )  $\delta$  160.7, 151.6, 136.0, 135.2, 134.1, 130.8, 129.3, 125.1, 123.9, 121.8, 121.0, 118.1, 116.8. These data are consistent with literature values, see: Y. Li, Y. Ding, J. Wang, Y. Su, X. Wang, *Org. Lett.*, 2013, **15**, 2574. (White solid, 22.5 mg, 62% isolated yield)

**3-fluoro-6H-benzo[c]chromen-6-one (2i):**  $^1\text{H}$  NMR (400 MHz,  $\text{CDCl}_3$ )  $\delta$  8.41-8.39 (d,  $J = 7.6$  Hz, 1H), 8.07-8.03 (m, 2H), 7.86-7.82 (m, 1H), 7.61-7.57 (m, 1H), 7.11-7.07 (m, 2H);  $^{13}\text{C}$  NMR (100 MHz,  $\text{CDCl}_3$ )  $\delta$  164.8, 162.3, 161.0, 152.2, 135.2, 134.4, 130.8, 128.9, 124.5, 124.4, 121.6, 120.5, 114.7, 112.7, 112.4, 105.4, 105.1;  $^{19}\text{F}$  NMR (376 MHz,  $\text{CDCl}_3$ )  $\delta$  -108.26; These data are consistent with literature values, see: Y. Li, Y. Ding, J. Wang, Y. Su, X. Wang, *Org. Lett.*, 2013, **15**, 2574. (Yellow solid, 11.2 mg, 48% isolated yield)

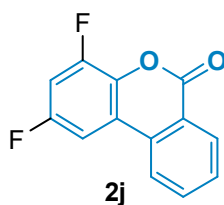

**2,4-difluoro-6H-benzo[c]chromen-6-one (2j):**  $^1\text{H}$  NMR (400 MHz,  $\text{CDCl}_3$ )  $\delta$

8.47-8.44 (dd,  $J_1 = 1.2$  Hz,  $J_2 = 8.0$  Hz, 1H), 8.05-8.03 (d,  $J = 8.0$  Hz, 1H), 7.91-7.87 (m, 1H), 7.71-7.67 (m, 1H), 7.56-7.53 (m, 1H), 7.10-7.04 (m, 1H);  $^{13}\text{C}$  NMR (100 MHz,  $\text{CDCl}_3$ )  $\delta$  159.5, 157.2, 157.1, 151.7, 149.3, 149.2, 135.3, 133.4, 131.1, 130.3, 122.3, 121.5, 120.5, 106.0, 105.8, 105.7, 105.5, 104.3, 104.2, 104.1, 104.0;  $^{19}\text{F}$  NMR (376 MHz,  $\text{CDCl}_3$ )  $\delta$  -114.18, -127.46. These data are consistent with literature values, see: X.-Z. Tao, J.-J. Dai, J. Z., J. X. and H.-J. Xu, *Chem. Eur. J.*, 2018, **24**, 6932. (White solid, 9.7 mg, 43% isolated yield)

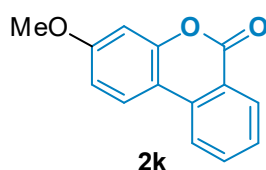

**3-methoxy-6H-benzo[c]chromen-6-one (2k):**  $^1\text{H}$  NMR (400 MHz,  $\text{CDCl}_3$ )  $\delta$  8.38-8.36 (m, 1H), 8.03-7.95 (m, 2H), 7.82-7.77 (m, 1H), 7.53-7.50 (m, 1H), 6.94-6.91 (m, 1H), 6.89-6.88 (d,  $J = 2.8$  Hz, 1H), 3.89 (s, 3H);  $^{13}\text{C}$  NMR (100 MHz,  $\text{CDCl}_3$ )  $\delta$  161.6, 152.7, 137.6, 130.3, 129.7, 128.4, 127.8, 127.6, 123.9, 120.8, 115.4, 112.6, 101.7, 55.8. These data are consistent with literature values, see: Y. Li, Y. Ding, J. Wang, Y. Su, X. Wang, *Org. Lett.*, 2013, **15**, 2574. (Orange solid, 14.3 mg, 63% isolated yield)

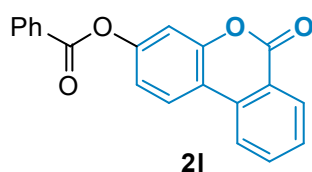

**6-oxo-6H-benzo[c]chromen-3-yl benzoate (2l):**  $^1\text{H}$  NMR (400 MHz,  $\text{CDCl}_3$ )  $\delta$  8.43-8.41 (m, 1H), 8.24-8.22 (d,  $J = 7.6$  Hz, 2H), 8.13-8.11 (m, 3H), 7.87-7.83 (m, 1H), 7.70-7.46 (m, 4H), 7.28-7.25 (m, 1H);  $^{13}\text{C}$  NMR (100 MHz,  $\text{CDCl}_3$ )  $\delta$  171.9, 164.8, 152.3, 151.9, 135.2, 134.4, 134.1, 133.9, 130.8, 130.4, 130.3, 129.4, 129.0, 128.8, 128.6, 123.8, 121.8, 120.9, 118.7, 116.1, 111.4; HRMS calculated for  $\text{C}_{20}\text{H}_{13}\text{O}_4$  ( $\text{M} + \text{H}^+$ ): 317.0814, found: 317.0808. (Yellow solid, 12.7 mg, 58% isolated yield)

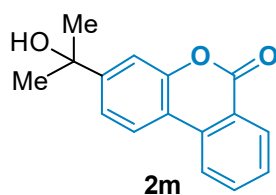

**3-(2-hydroxypropan-2-yl)-6H-benzo[c]chromen-6-one (2m):**  $^1\text{H}$  NMR (400 MHz,  $\text{CDCl}_3$ )  $\delta$  8.42-8.39 (dd,  $J_1 = 0.8$  Hz,  $J_2 = 8.4$  Hz, 1H), 8.12-8.10 (d,  $J = 8.0$  Hz, 1H), 8.04-8.02 (d,  $J = 8.0$  Hz, 1H), 7.85-7.81 (m, 1H), 7.60-7.56 (m, 1H), 7.50-7.47 (m, 2H), 1.64 (s, 6H);  $^{13}\text{C}$  NMR (100 MHz,  $\text{CDCl}_3$ )  $\delta$  161.5, 152.5, 151.3, 135.0, 134.8, 130.7, 128.8, 122.8, 121.7, 121.1, 119.2, 116.5, 113.9, 72.5, 31.8; HRMS calculated for  $\text{C}_{16}\text{H}_{15}\text{O}_3$  ( $\text{M} + \text{H}^+$ ): 255.1021, found: 255.1016. (Pale yellow solid, 6.5 mg, 29% isolated yield)

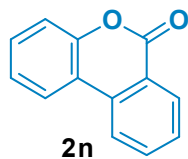

**6H-benzo[c]chromen-6-one (2n):**  $^1\text{H}$  NMR (400 MHz,  $\text{CDCl}_3$ )  $\delta$  8.42-8.39 (dd,  $J_1 = 1.2$  Hz,  $J_2 = 8.0$  Hz, 1H), 8.14-8.12 (d,  $J = 8.0$  Hz, 1H), 8.08-8.05 (dd,  $J_1 = 1.6$  Hz,  $J_2 = 8.0$  Hz, 1H), 7.85-7.81 (m, 1H), 7.61-7.57 (m, 1H), 7.51-7.46 (m, 1H), 7.38-7.32 (m, 2H);  $^{13}\text{C}$  NMR (100 MHz,  $\text{CDCl}_3$ )  $\delta$  161.3, 151.3, 136.1, 135.0, 130.7, 130.5, 129.0, 125.8, 124.7, 122.9, 121.8, 121.3, 117.9. These data are consistent with literature values, see: Y. Li, Y. Ding, J. Wang, Y. Su, X. Wang, *Org. Lett.*, 2013, **15**, 2574. (Yellow oil, 13.9 mg, 60% isolated yield)

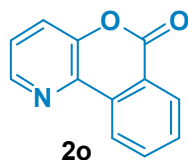

**6H-isochromeno[4,3-b]pyridin-6-one (2o):**  $^1\text{H}$  NMR (400 MHz,  $\text{CDCl}_3$ )  $\delta$  8.71-8.69

(d,  $J = 7.2$  Hz, 1H), 8.64-8.62 (m, 1H), 8.41-8.39 (m, 1H), 7.96-7.91 (m, 1H), 7.74-7.67 (m, 2H), 7.47-7.44 (, 1H);  $^{13}\text{C}$  NMR (100 MHz,  $\text{CDCl}_3$ )  $\delta$  160.3, 152.6, 147.8, 146.2, 136.9, 135.7, 135.4, 130.7, 130.2, 124.9, 123.5, 122.5. These data are consistent with literature values, see: X.-Z. Tao, J.-J. Dai, J. Z., J. X. and H.-J. Xu, *Chem. Eur. J.*, 2018, **24**, 6932. (White solid, 12.3 mg, 52% isolated yield)

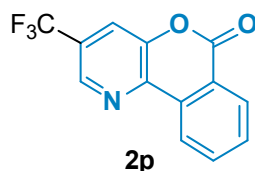

**3-(trifluoromethyl)-6H-isochromeno[4,3-b]pyridin-6-one (2p):**  $^1\text{H}$  NMR (400 MHz,  $\text{CDCl}_3$ )  $\delta$  8.86-8.85 (d,  $J = 1.2$  Hz, 1H), 8.74-8.72 (d,  $J = 8.0$  Hz, 1H), 8.43-8.41 (dd,  $J_1 = 1.2$  Hz,  $J_2 = 8.0$  Hz, 1H), 8.00-7.96 (m, 1H), 7.89-7.88 (d,  $J = 1.2$  Hz, 1H), 7.82-7.78 (m, 1H);  $^{13}\text{C}$  NMR (100 MHz,  $\text{CDCl}_3$ )  $\delta$  159.4, 147.0, 142.6, 142.5, 140.0, 135.7, 134.5, 131.9, 130.5, 127.7, 127.4, 124.2, 122.9, 122.3, 122.2;  $^{19}\text{F}$  NMR (376 MHz,  $\text{CDCl}_3$ )  $\delta$  -61.91; HRMS calculated for  $\text{C}_{13}\text{H}_7\text{F}_3\text{NO}_2$  ( $\text{M} + \text{H}^+$ ): 266.0429, found: 266.0423. (White solid, 16.5mg, 71% isolated yield)

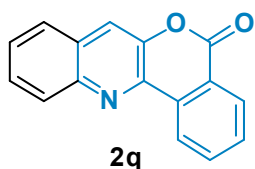

**5H-isochromeno[4,3-b]quinolin-5-one (2q):**  $^1\text{H}$  NMR (400 MHz,  $\text{CDCl}_3$ )  $\delta$  8.96-8.94 (d,  $J = 8.0$  Hz, 1H), 8.44-8.42 (m, 1H), 8.23-8.21 (d,  $J = 8.8$  Hz, 1H), 8.05 (s, 1H), 8.00-7.95 (m, 1H), 7.91-7.89 (d,  $J = 8.0$  Hz, 1H), 7.79-7.73 (m, 2H), 7.64-7.59 (m, 1H);  $^{13}\text{C}$  NMR (100 MHz,  $\text{CDCl}_3$ )  $\delta$  160.3, 145.7, 145.2, 138.7, 135.6, 135.3, 131.3, 130.4, 129.7, 129.3, 128.9, 127.9, 127.5, 124.4, 123.4, 121.1; HRMS calculated for  $\text{C}_{16}\text{H}_{10}\text{NO}_2$  ( $\text{M} + \text{H}^+$ ): 248.0712, found: 248.0706. (White solid, 14.5 mg, 62% isolated yield)

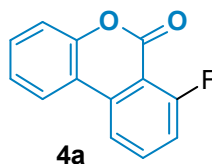

**7-fluoro-6H-benzo[c]chromen-6-one (4a):**  $^1\text{H}$  NMR (400 MHz,  $\text{CDCl}_3$ )  $\delta$  8.06-8.03 (m, 1H), 7.96-7.93 (d,  $J = 8.4$  Hz, 1H), 7.83-7.78 (m, 1H), 7.54-7.49 (m, 1H), 7.37-7.33 (m, 2H), 7.30-7.25 (m, 1H);  $^{13}\text{C}$  NMR (100 MHz,  $\text{CDCl}_3$ )  $\delta$  165.0, 162.4, 156.8, 151.6, 137.4, 136.3, 136.2, 131.3, 124.8, 123.3, 117.8, 117.7, 117.6, 117.1, 116.6, 116.4;  $^{19}\text{F}$  NMR (376 MHz,  $\text{CDCl}_3$ )  $\delta$  -105.75. These data are consistent with literature values, see: S. Xia, K. Hu, C. Lei and J. Jin. *Org. Lett.*, 2020, **22**, 1385. (Yellow solid, 17.5 mg, 72% isolated yield)

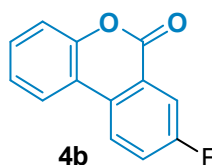

**8-fluoro-6H-benzo[c]chromen-6-one (4b):**  $^1\text{H}$  NMR (400 MHz,  $\text{CDCl}_3$ )  $\delta$  8.17-8.13 (m, 1H), 8.08-8.02 (m, 2H), 7.59-7.54 (m, 1H), 7.52-7.48 (m, 1H), 7.40-7.35 (m, 2H);  $^{13}\text{C}$  NMR (100 MHz,  $\text{CDCl}_3$ )  $\delta$  163.8, 161.3, 160.4, 150.9, 131.4, 130.5, 128.3, 124.9, 124.4, 124.3, 123.3, 123.1, 122.7, 118.0, 117.5, 116.4, 116.2;  $^{19}\text{F}$  NMR (376 MHz,  $\text{CDCl}_3$ )  $\delta$  -110.04. These data are consistent with literature values, see: Y. Wang, J.-Y. Gu and Z.-J. Shi, *Org. Lett.*, 2017, **19**, 1326. (White solid, 10.0 mg, 43% isolated yield)

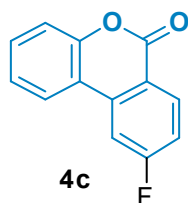

**9-fluoro-6H-benzo[c]chromen-6-one (4c):**  $^1\text{H}$  NMR (400 MHz,  $\text{CDCl}_3$ )  $\delta$  8.46-8.42 (m, 1H), 7.98-7.96 (m, 1H), 7.76-7.73 (m, 1H), 7.55-7.51 (m, 1H), 7.40-7.34 (m, 2H),

7.31-7.26 (m, 1H);  $^{13}\text{C}$  NMR (100 MHz,  $\text{CDCl}_3$ )  $\delta$  168.4, 165.8, 160.4, 151.7, 137.8, 134.1, 134.0, 131.4, 124.8, 123.1, 118.0, 117.8, 117.5, 117.3, 117.0, 108.4, 108.2;  $^{19}\text{F}$  NMR (376 MHz,  $\text{CDCl}_3$ )  $\delta$  -100.94. These data are consistent with literature values, see: S. Xia, K. Hu, C. Lei and J. Jin. *Org. Lett.*, 2020, **22**, 1385. (White solid, 12.0 mg, 51% isolated yield)

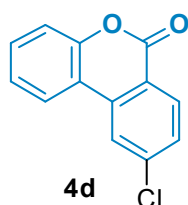

**9-chloro-6H-benzo[c]chromen-6-one (4d):**  $^1\text{H}$  NMR (400 MHz,  $\text{CDCl}_3$ )  $\delta$  8.34-8.32 (d,  $J = 8.0$  Hz, 1H), 8.07-8.06 (d,  $J = 2.0$  Hz, 1H), 8.00-7.98 (d,  $J = 7.6$  Hz, 1H), 7.55-7.50 (m, 2H), 7.38-7.34 (m, 2H);  $^{13}\text{C}$  NMR (100 MHz,  $\text{CDCl}_3$ )  $\delta$  160.5, 151.7, 141.9, 136.4, 132.3, 131.3, 129.4, 124.9, 123.0, 121.9, 119.6, 118.0, 117.1. These data are consistent with literature values, see: M. Chao, F. Wang, L. Xu, Y. Ju, Z. Chen, B. Wang, P. Gong, J. You, M. Jin and D. Shen. *J. Org. Chem.*, 2021, **86**, 13371. (White solid, 16.5 mg, 71% isolated yield)

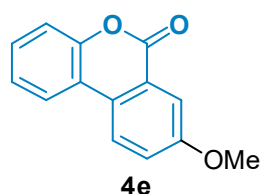

**8-methoxy-6H-benzo[c]chromen-6-one (4e):**  $^1\text{H}$  NMR (400 MHz,  $\text{CDCl}_3$ )  $\delta$  8.06-8.04 (d,  $J = 9.2$  Hz, 1H), 8.01-7.98 (m, 1H), 7.83-7.82 (d,  $J = 3.2$  Hz, 1H), 7.46-7.31 (m, 4H), 3.95 (s, 3H);  $^{13}\text{C}$  NMR (100 MHz,  $\text{CDCl}_3$ )  $\delta$  160.1, 150.5, 129.4, 128.2, 127.2, 124.7, 124.4, 123.5, 122.5, 122.3, 118.3, 117.7, 111.2, 55.9. These data are consistent with literature values, see: S. Xia, K. Hu, C. Lei and J. Jin. *Org. Lett.*, 2020, **22**, 1385. (Yellow solid, 10.9 mg, 48% isolated yield)



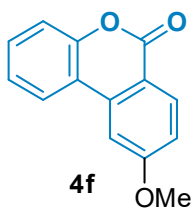

**9-methoxy-6H-benzo[c]chromen-6-one (4f):**  $^1\text{H}$  NMR (400 MHz,  $\text{CDCl}_3$ )  $\delta$  8.36-8.34 (d,  $J = 9.2$  Hz, 1H), 8.02-8.00 (m, 1H), 7.51-7.47 (m, 2H), 7.38-7.31 (m, 2H), 7.14-7.11 (m, 1H), 4.00 (s, 3H);  $^{13}\text{C}$  NMR (100 MHz,  $\text{CDCl}_3$ )  $\delta$  164.9, 151.7, 137.0, 133.0, 130.7, 129.7, 124.5, 122.8, 117.9, 115.4, 114.4, 105.2, 55.8. These data are consistent with literature values, see: S. Xia, K. Hu, C. Lei and J. Jin. *Org. Lett.*, 2020, **22**, 1385. (Yellow solid, 13.6 mg, 80% isolated yield)

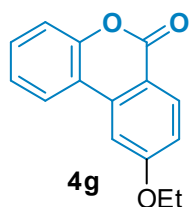

**9-ethoxy-6H-benzo[c]chromen-6-one (4g):**  $^1\text{H}$  NMR (400 MHz,  $\text{CDCl}_3$ )  $\delta$  8.33-8.31 (d,  $J = 8.8$  Hz, 1H), 8.00-7.98 (dd,  $J_1 = 1.6$  Hz,  $J_2 = 8.0$  Hz, 1H), 7.50-7.46 (m, 2H), 7.37-7.30 (m, 2H), 7.11-7.08 (m, 1H), 4.25-4.20 (q,  $J = 7.2$  Hz, 2H), 1.53-1.50 (t,  $J = 6.8$  Hz, 3H);  $^{13}\text{C}$  NMR (100 MHz,  $\text{CDCl}_3$ )  $\delta$  164.4, 161.2, 151.7, 137.0, 133.0, 130.6, 124.4, 122.8, 118.2, 117.9, 116.5, 114.2, 105.8, 64.2, 14.8; HRMS calculated for  $\text{C}_{15}\text{H}_{13}\text{O}_3$  ( $\text{M} + \text{H}^+$ ): 241.0865, found: 241.0859. (White solid, 16.9 mg, 72% isolated yield)

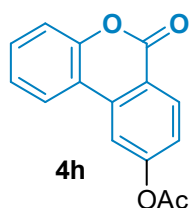

**6-oxo-6H-benzo[c]chromen-9-yl acetate (4h):**  $^1\text{H}$  NMR (400 MHz,  $\text{CDCl}_3$ )  $\delta$  8.45-8.43 (d,  $J = 8.4$  Hz, 1H), 7.99-7.97 (dd,  $J_1 = 1.2$  Hz,  $J_2 = 8.0$  Hz, 1H), 7.87-7.86 (d,  $J = 2.4$  Hz, 1H), 7.53-7.49 (m, 1H), 7.39-7.31 (m, 3H), 2.40 (s, 3H), 2.01 (s, 2H);

$^{13}\text{C}$  NMR (100 MHz,  $\text{CDCl}_3$ )  $\delta$  168.8, 160.6, 156.0, 151.6, 136.8, 132.7, 131.1, 124.7, 123.1, 122.8, 118.8, 118.0, 117.6, 114.7, 21.3; HRMS calculated for  $\text{C}_{15}\text{H}_{11}\text{O}_4$  ( $\text{M} + \text{H}^+$ ): 255.0657, found: 255.0652. (White solid, 10.9 mg, 47% isolated yield)

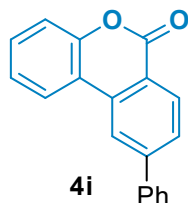

**9-phenyl-6H-benzo[c]chromen-6-one (4i):**  $^1\text{H}$  NMR (400 MHz,  $\text{CDCl}_3$ )  $\delta$  8.47-8.45 (d,  $J = 8.4$  Hz, 1H), 8.29-8.28 (d,  $J = 2.0$  Hz, 1H), 8.16-8.14 (dd,  $J_1 = 0.8$  Hz,  $J_2 = 8.0$  Hz, 1H), 7.81-7.78 (dd,  $J_1 = 1.2$  Hz,  $J_2 = 8.0$  Hz, 1H), 7.73-7.71 (m, 2H), 7.56-7.46 (m, 4H), 7.40-7.34 (m, 2H);  $^{13}\text{C}$  NMR (100 MHz,  $\text{CDCl}_3$ )  $\delta$  161.3, 151.6, 147.9, 139.7, 135.2, 131.3, 130.7, 129.3, 128.9, 128.0, 127.6, 124.7, 122.9, 120.2, 120.0, 118.2, 118.0. These data are consistent with literature values, see: C. Pan, L. Wang and J. Han, *Org. Lett.*, 2020, **22**, 4776. (Yellow solid, 9.7 mg, 43% isolated yield)

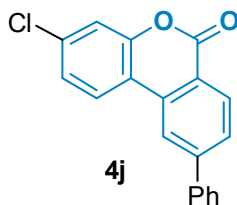

**3-chloro-9-phenyl-6H-benzo[c]chromen-6-one (4j):**  $^1\text{H}$  NMR (400 MHz,  $\text{CDCl}_3$ )  $\delta$  8.46-8.44 (d,  $J = 8.0$  Hz, 1H), 8.23-8.22 (d,  $J = 2.0$  Hz, 1H), 8.09-8.06 (d,  $J = 8.4$  Hz, 1H), 7.83-7.80 (dd,  $J_1 = 2.0$  Hz,  $J_2 = 8.4$  Hz, 1H), 7.72-7.70 (m, 2H), 7.57-7.53 (m, 2H), 7.51-7.48 (m, 1H), 7.40-7.39 (m, 1H), 7.35-7.33 (m, 1H);  $^{13}\text{C}$  NMR (100 MHz,  $\text{CDCl}_3$ )  $\delta$  160.7, 151.8, 148.2, 139.5, 136.1, 134.5, 131.4, 129.3, 129.1, 128.3, 127.6, 125.1, 123.9, 120.2, 119.6, 118.1, 116.9; HRMS calculated for  $\text{C}_{19}\text{H}_{11}\text{ClNaO}_2$  ( $\text{M} + \text{Na}^+$ ): 329.0345, found: 329.0340. (White solid, 12.8 mg, 58% isolated yield)

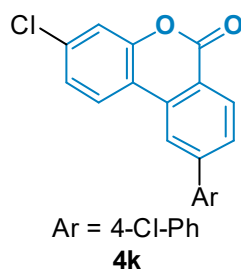

**3-chloro-9-(4-chlorophenyl)-6H-benzo[c]chromen-6-one (4k):**  $^1\text{H}$  NMR (400 MHz,  $\text{CDCl}_3$ )  $\delta$  8.46-8.44 (d,  $J = 8.4$  Hz, 1H), 8.19 (s, 1H), 8.08-8.06 (d,  $J = 8.4$  Hz, 1H), 7.78-7.76 (d,  $J = 8.0$  Hz, 1H), 7.65-7.63 (d,  $J = 8.0$  Hz, 2H), 7.52-7.50 (d,  $J = 8.4$  Hz, 2H), 7.41 (s, 1H), 7.36-7.34 (d,  $J = 8.8$  Hz, 1H);  $^{13}\text{C}$  NMR (100 MHz,  $\text{CDCl}_3$ )  $\delta$  160.5, 151.9, 146.9, 137.9, 136.3, 135.4, 134.6, 131.6, 129.5, 128.9, 128.1, 125.2, 123.9, 120.0, 119.9, 118.2, 116.7; HRMS calculated for  $\text{C}_{19}\text{H}_{11}\text{Cl}_2\text{O}_2$  ( $\text{M} + \text{H}^+$ ): 341.0136, found: 341.0131. (White solid, 10.0 mg, 46% isolated yield)

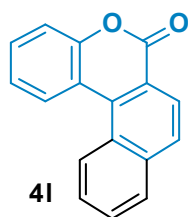

**6H-naphtho[2,1-c]chromen-6-one (4l):**  $^1\text{H}$  NMR (400 MHz,  $\text{CDCl}_3$ )  $\delta$  8.91-8.88 (m, 1H), 8.55-8.53 (m, 1H), 8.35-8.33 (d,  $J = 8.8$  Hz, 1H), 8.03-8.00 (m, 1H), 7.98-7.96 (d,  $J = 8.8$  Hz, 1H), 7.76-7.70 (m, 2H), 7.56-7.50 (m, 2H), 7.44-7.40 (m, 1H);  $^{13}\text{C}$  NMR (100 MHz,  $\text{CDCl}_3$ )  $\delta$  161.8, 151.7, 137.2, 134.5, 130.2, 129.7, 129.3, 129.1, 128.4, 128.0, 127.6, 127.3, 124.6, 124.3, 120.2, 118.9, 118.1. These data are consistent with literature values, see: S. Xia, K. Hu, C. Lei and J. Jin. *Org. Lett.*, 2020, **22**, 1385. (Yellow oil, 17.7 mg, 76% isolated yield)

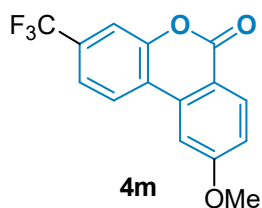

**9-methoxy-3-(trifluoromethyl)-6H-benzo[*c*]chromen-6-one (4m):**  $^1\text{H}$  NMR (400 MHz,  $\text{CDCl}_3$ )  $\delta$  8.36-8.34 (d,  $J = 8.8$  Hz, 1H), 8.12-8.10 (d,  $J = 8.4$  Hz, 1H), 7.60-7.55 (m, 2H), 7.51-7.50 (d,  $J = 2.4$  Hz, 1H), 7.19-7.16 (dd,  $J_1 = 2.4$  Hz,  $J_2 = 9.2$  Hz, 1H), 4.02 (s, 3H);  $^{13}\text{C}$  NMR (100 MHz,  $\text{CDCl}_3$ )  $\delta$  165.1, 160.2, 151.4, 135.6, 133.3, 132.6, 132.2, 123.7, 121.1, 120.9, 117.2, 115.4, 114.7, 110.3, 106.0, 56.0;  $^{19}\text{F}$  NMR (376 MHz,  $\text{CDCl}_3$ )  $\delta$  -63.31; HRMS calculated for  $\text{C}_{15}\text{H}_{10}\text{F}_3\text{O}_3$  ( $\text{M} + \text{H}^+$ ): 295.0582, found: 295.0577. (Yellow solid, 19.8mg, 85% isolated yield)

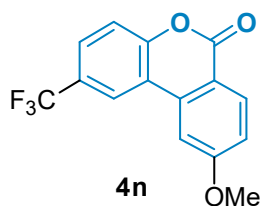

**9-methoxy-2-(trifluoromethyl)-6H-benzo[*c*]chromen-6-one (4n):**  $^1\text{H}$  NMR (400 MHz,  $\text{CDCl}_3$ )  $\delta$  8.37-8.35 (d,  $J = 8.8$  Hz, 1H), 8.25-8.24 (d,  $J = 1.2$  Hz, 1H), 7.75-7.72 (dd,  $J_1 = 1.6$  Hz,  $J_2 = 8.8$  Hz, 1H), 7.51-7.46 (m, 2H), 7.20-7.17 (dd,  $J_1 = 2.4$  Hz,  $J_2 = 9.2$  Hz, 1H), 4.01 (s, 3H);  $^{13}\text{C}$  NMR (100 MHz,  $\text{CDCl}_3$ )  $\delta$  165.3, 160.3, 153.6, 135.8, 133.3, 127.3, 127.2, 127.0, 120.6, 120.5, 118.7, 118.5, 117.2, 114.3, 105.4, 56.1;  $^{19}\text{F}$  NMR (376 MHz,  $\text{CDCl}_3$ )  $\delta$  -61.81. These data are consistent with literature values, see: L. Pan, J. Dong, D. Xie, Y. Li and Q. Liu, *Adv. Synth. Catal.*, 2018, **360**, 958. (Yellow solid, 10.9 mg, 56% isolated yield)

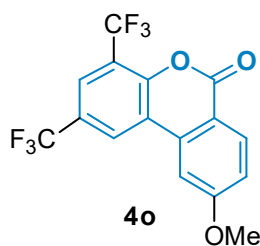

**9-methoxy-2,4-bis(trifluoromethyl)-6H-benzo[*c*]chromen-6-one (4o):**  $^1\text{H}$  NMR (400 MHz,  $\text{CDCl}_3$ )  $\delta$  8.43-8.37 (m, 2H), 8.02 (s, 1H), 7.52-7.51 (d,  $J = 2.0$  Hz, 1H), 7.25-7.22 (m, 1H), 4.05 (s, 3H);  $^{13}\text{C}$  NMR (100 MHz,  $\text{CDCl}_3$ )  $\delta$  165.5, 158.2, 134.7, 133.6, 126.1, 124.8, 124.1, 120.0, 117.8, 113.9, 106.0, 56.2;  $^{19}\text{F}$  NMR (376 MHz,

CDCl<sub>3</sub>)  $\delta$  -62.04, -62.07; HRMS calculated for C<sub>16</sub>H<sub>9</sub>F<sub>6</sub>O<sub>3</sub> (M + H<sup>+</sup>): 363.0456, found: 363.0450. (Yellow solid, 15.7 mg, 72% isolated yield)

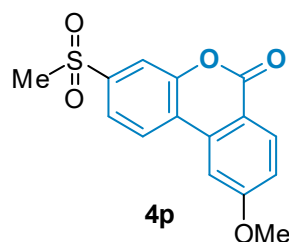

**9-methoxy-3-(methylsulfonyl)-6H-benzo[c]chromen-6-one (4p):** <sup>1</sup>H NMR (400 MHz, CDCl<sub>3</sub>)  $\delta$  8.40-8.38 (d, *J* = 8.8 Hz, 1H), 8.22-8.20 (d, *J* = 8.0 Hz, 1H), 7.93-7.87 (m, 2H), 7.55 (s, 1H), 7.27-7.23 (m, 1H), 4.03 (s, 3H), 3.14 (s, 3H); <sup>13</sup>C NMR (100 MHz, CDCl<sub>3</sub>)  $\delta$  165.2, 159.9, 151.6, 142.0, 135.1, 133.5, 127.2, 124.3, 122.7, 117.7, 117.5, 114.8, 106.4, 56.1, 44.5; HRMS calculated for C<sub>15</sub>H<sub>12</sub>NaO<sub>5</sub>S (M + Na<sup>+</sup>): 327.0303, found: 327.0298. (Pale yellow solid, 15.6 mg, 70% isolated yield)

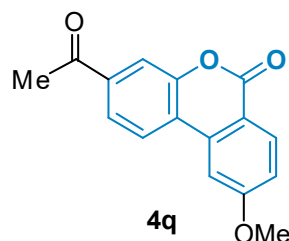

**3-acetyl-9-methoxy-6H-benzo[c]chromen-6-one (4q):** <sup>1</sup>H NMR (400 MHz, CDCl<sub>3</sub>)  $\delta$  8.34-8.32 (d, *J* = 8.8 Hz, 1H), 8.07-8.04 (m, 1H), 7.90-7.86 (m, 2H), 7.50-7.49 (d, *J* = 2.4 Hz, 1H), 7.18-7.16 (dd, *J*<sub>1</sub> = 2.4 Hz, *J*<sub>2</sub> = 8.8 Hz, 1H), 4.02 (s, 3H), 2.67 (s, 3H); <sup>13</sup>C NMR (100 MHz, CDCl<sub>3</sub>)  $\delta$  196.8, 165.1, 160.0, 151.5, 138.5, 135.8, 133.2, 123.7, 123.2, 122.0, 118.0, 117.3, 114.7, 106.0, 56.0, 26.8; HRMS calculated for C<sub>16</sub>H<sub>13</sub>O<sub>4</sub> (M + H<sup>+</sup>): 269.0814, found: 269.0808. (Yellow solid, 18.6 mg, 81% isolated yield)

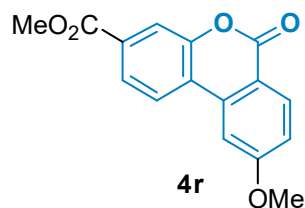

**methyl 9-methoxy-6-oxo-6*H*-benzo[*c*]chromene-3-carboxylate (4r):**  $^1\text{H}$  NMR (400 MHz,  $\text{CDCl}_3$ )  $\delta$  8.38-8.36 (d,  $J = 8.8$  Hz, 1H), 8.09-8.07 (d,  $J = 8.0$  Hz, 1H), 8.01-7.97 (m, 2H), 7.54-7.53 (d,  $J = 2.8$  Hz, 1H), 7.20-7.17 (dd,  $J_1 = 2.4$  Hz,  $J_2 = 8.8$  Hz, 1H), 4.02 (s, 3H), 3.98 (s, 3H);  $^{13}\text{C}$  NMR (100 MHz,  $\text{CDCl}_3$ )  $\delta$  165.9, 165.0, 160.6, 151.4, 135.9, 133.2, 132.0, 125.2, 123.0, 122.0, 119.2, 117.2, 114.8, 106.0, 55.9, 52.7; HRMS calculated for  $\text{C}_{16}\text{H}_{13}\text{O}_5$  ( $\text{M} + \text{H}^+$ ): 285.0763, found: 285.0760. (White solid, 13.8 mg, 62% isolated yield)

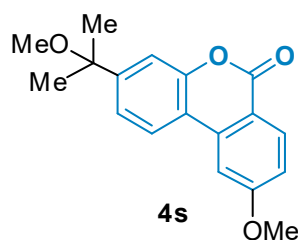

**9-methoxy-3-(2-methoxypropan-2-yl)-6*H*-benzo[*c*]chromen-6-one (4s):**  $^1\text{H}$  NMR (400 MHz,  $\text{CDCl}_3$ )  $\delta$  8.34-8.32 (d,  $J = 8.8$  Hz, 1H), 8.09-8.05 (m, 1H), 7.96-7.94 (d,  $J = 9.2$  Hz, 1H), 7.61-7.58 (d,  $J = 8.8$  Hz, 1H), 7.48-7.45 (m, 3H), 7.12-7.09 (dd,  $J_1 = 2.8$  Hz,  $J_2 = 9.2$  Hz, 1H), 4.00 (s, 3H), 1.64 (s, 6H);  $^{13}\text{C}$  NMR (100 MHz,  $\text{CDCl}_3$ )  $\delta$  164.9, 152.6, 151.6, 136.9, 133.0, 130.3, 124.7, 122.8, 120.9, 116.5, 116.1, 114.0, 105.1, 56.9, 31.7; HRMS calculated for  $\text{C}_{18}\text{H}_{19}\text{O}_4$  ( $\text{M} + \text{H}^+$ ): 299.1283, found: 299.1278. (Pale yellow solid, 10.7 mg, 48% isolated yield)

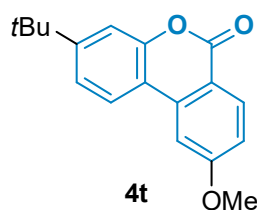

**3-(*tert*-butyl)-9-methoxy-6*H*-benzo[*c*]chromen-6-one (4t):**  $^1\text{H}$  NMR (400 MHz,  $\text{CDCl}_3$ )  $\delta$  8.34-8.32 (d,  $J = 8.8$  Hz, 1H), 7.93-7.91 (d,  $J = 9.2$  Hz, 1H), 7.47-7.46 (d,  $J = 2.4$  Hz, 1H), 7.38-7.35 (m, 2H), 7.10-7.08 (dd,  $J_1 = 2.4$  Hz,  $J_2 = 8.8$  Hz, 1H), 4.00 (s, 3H), 1.37 (s, 9H);  $^{13}\text{C}$  NMR (100 MHz,  $\text{CDCl}_3$ )  $\delta$  164.9, 161.5, 154.9, 151.7, 137.2, 133.0, 130.2, 127.2, 125.6, 122.5, 121.9, 115.8, 105.0, 55.8, 35.1, 31.2; HRMS

calculated for  $C_{18}H_{19}O_3$  ( $M + H^+$ ): 283.1334, found: 283.1329. (Orange solid, 13.1 mg, 59% isolated yield)

## Late-stage functionalization of substances derived from natural products

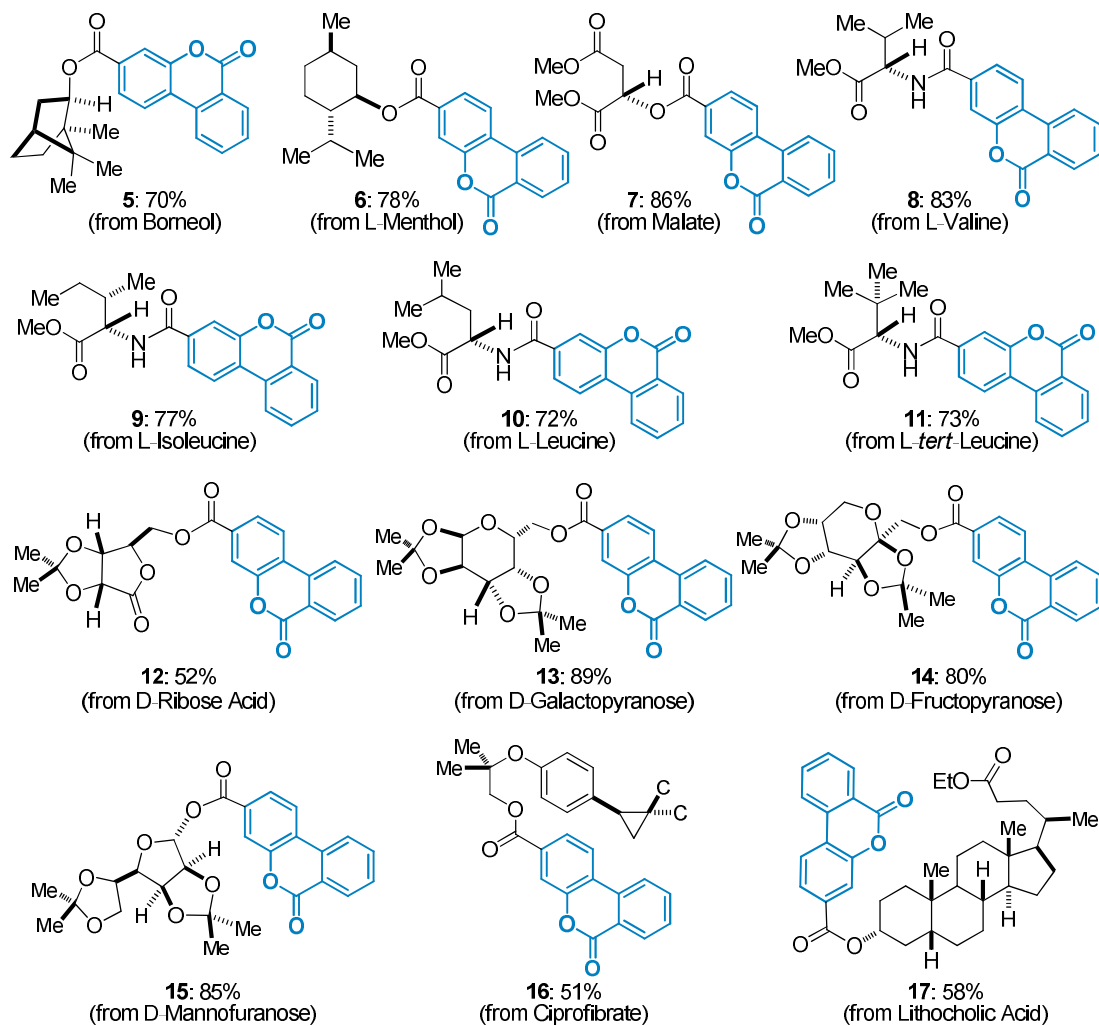

These reactions were conducted in the solvent of MeCN/DCE (1:1) under otherwise identical reaction conditions

### $^1\text{H}$ and $^{13}\text{C}$ spectra data of compounds 5-17

**4,7,7-trimethylbicyclo[2.2.1]heptan-2-yl-6-oxo-6*H*-benzo[*c*]chromene-3-carboxylate (5):**  $^1\text{H}$  NMR (400 MHz,  $\text{CDCl}_3$ )  $\delta$  8.46-8.44 (m, 1H), 8.20-8.15 (m, 2H), 8.06-8.01 (m, 2H), 7.92-7.87 (m, 1H), 7.70-7.66 (t,  $J = 7.2$  Hz, 1H), 5.17-5.14 (m,



1H), 2.55-2.47 (m, 1H), 2.17-2.11 (m, 1H), 1.88-1.76 (m, 2H), 1.49-1.42 (m, 1H), 1.35-1.31 (m, 1H), 1.18-1.14 (m, 1H), 0.99 (s, 3H), 0.94 (s, 6H); <sup>13</sup>C NMR (100 MHz, CDCl<sub>3</sub>) δ 176.2, 165.6, 160.8, 151.0, 135.2, 133.9, 132.7, 130.9, 130.1, 125.4, 123.0, 122.5, 121.8, 119.1, 81.4, 49.3, 48.0, 45.1, 37.0, 28.2, 27.5, 19.8, 19.0, 13.7; HRMS calculated for C<sub>24</sub>H<sub>24</sub>NaO<sub>4</sub> (M + Na<sup>+</sup>): 399.1572, found: 399.1567. (Yellow solid, 15.2 mg, 70% isolated yield)

**2-isopropyl-5-methylcyclohexyl 6-oxo-6*H*-benzo[*c*]chromene-3-carboxylate (6):**

<sup>1</sup>H NMR (400 MHz, CDCl<sub>3</sub>) δ 8.46-8.44 (d, *J* = 7.6 Hz, 1H), 8.20-8.18 (d, *J* = 8.4 Hz, 1H), 8.15-8.13 (d, *J* = 8.0 Hz, 1H), 8.03-8.00 (m, 2H), 7.91-7.87 (m, 1H), 7.69-7.65 (t, *J* = 8.0 Hz, 1H), 4.99-4.93 (m, 1H), 2.18-2.15 (d, *J* = 12.0 Hz, 1H), 1.99-1.97 (m, 1H), 1.78-1.74 (m, 2H), 1.63-1.60 (m, 3H), 1.25 (s, 1H), 1.18-1.13 (m, 1H), 0.96-0.94 (dd, *J*<sub>1</sub> = 1.6 Hz, *J*<sub>2</sub> = 7.2 Hz, 6H), 0.82-0.80 (d, *J* = 6.8 Hz, 3H); <sup>13</sup>C NMR (100 MHz, CDCl<sub>3</sub>) δ 164.9, 160.8, 151.0, 135.2, 133.9, 132.7, 130.9, 130.0, 125.4, 122.9, 122.4, 121.8, 119.1, 75.8, 47.3, 41.0, 34.3, 31.6, 26.7, 23.7, 22.1, 20.9, 16.6; HRMS calculated for C<sub>24</sub>H<sub>26</sub>NaO<sub>4</sub> (M + Na<sup>+</sup>): 401.1729, found: 401.1723. (Yellow solid, 17.3 mg, 78% isolated yield)

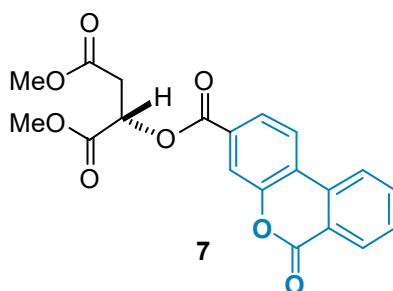

**dimethyl 2-((6-oxo-6*H*-benzo[*c*]chromene-3-carbonyl)oxy)succinate (7):** <sup>1</sup>H NMR (400 MHz, CDCl<sub>3</sub>) δ 8.45-8.43 (d, *J* = 8.0 Hz, 1H), 8.20-8.14 (m, 2H), 8.03-8.00 (m, 2H), 7.92-7.88 (t, *J* = 8.0 Hz, 1H), 7.71-7.67 (t, *J* = 7.6 Hz, 1H), 5.77-5.74 (m, 1H), 3.82 (s, 3H), 3.77 (s, 3H), 3.10-3.07 (m, 2H); <sup>13</sup>C NMR (100 MHz, CDCl<sub>3</sub>) δ 169.6, 169.2, 164.3, 160.6, 151.0, 135.2, 133.7, 130.9, 130.8, 130.3, 125.7, 123.1, 122.6, 121.9, 119.6, 69.2, 53.0, 52.5, 36.1; HRMS calculated for C<sub>20</sub>H<sub>16</sub>NaO<sub>8</sub> (M + Na<sup>+</sup>): 407.0743, found: 407.0737. (Yellow solid, 20.1mg, 86% isolated yield)

**methyl (6-oxo-6*H*-benzo[*c*]chromene-3-carbonyl)valinate (8):** <sup>1</sup>H NMR (400 MHz, CDCl<sub>3</sub>) δ 8.45-8.43 (d, *J* = 8.0 Hz, 1H), 8.18-8.13 (d, *J* = 8.8 Hz, 2H), 7.90-7.86 (d, *J* = 7.6 Hz, 1H), 7.80-7.78 (m, 2H), 7.70-7.64 (m, 1H), 6.80-6.78 (d, *J* = 8.4 Hz, 1H), 4.82-4.79 (m, 1H), 3.81 (s, 3H), 1.06-1.02 (t, *J* = 7.6 Hz, 6H); <sup>13</sup>C NMR (100 MHz, CDCl<sub>3</sub>) δ 172.6, 165.9, 160.7, 151.1, 135.9, 135.2, 133.8, 130.9, 130.0, 123.4, 123.3, 122.3, 121.7, 121.0, 116.7, 57.8, 52.5, 31.7, 19.1, 18.0; HRMS calculated for C<sub>20</sub>H<sub>19</sub>NNaO<sub>5</sub> (M + Na<sup>+</sup>): 376.1161, found: 376.1155. (White solid, 19.1 mg, 83% isolated yield)

**methyl (6-oxo-6*H*-benzo[*c*]chromene-3-carbonyl)-*L*-isoleucinate (9):** <sup>1</sup>H NMR (400 MHz, CDCl<sub>3</sub>) δ 8.45-8.42 (d, *J* = 8.4 Hz, 1H), 8.17-8.12 (m, 2H), 7.90-7.86 (m, 1H), 7.79-7.78 (m, 2H), 7.68-7.64 (m, 1H), 6.83-6.81 (d, *J* = 8.4 Hz, 1H), 4.86-4.82

(m, 1H), 3.81 (s, 3H), 2.10-2.01 (m, 1H), 1.60-1.53 (m, 1H), 1.32-1.23 (m, 1H), 1.02-1.00 (m, 5H);  $^{13}\text{C}$  NMR (100 MHz,  $\text{CDCl}_3$ )  $\delta$  172.6, 165.7, 160.8, 151.1, 136.0, 135.2, 133.8, 130.9, 130.0, 123.3, 123.2, 122.3, 121.6, 121.0, 116.6, 57.1, 52.5, 38.3, 25.5, 15.6, 11.7; HRMS calculated for  $\text{C}_{21}\text{H}_{21}\text{NNaO}_5$  ( $\text{M} + \text{Na}^+$ ): 390.1317, found: 390.1312. (Yellow solid, 17.4 mg, 77% isolated yield)

**methyl (6-oxo-6*H*-benzo[*c*]chromene-3-carbonyl)-*L*-leucinate (10):**  $^1\text{H}$  NMR (400 MHz,  $\text{CDCl}_3$ )  $\delta$  8.43-8.41 (m, 1H), 8.16-8.10 (m, 2H), 7.90-7.86 (m, 1H), 7.78-7.76 (m, 2H), 7.68-7.64 (t,  $J = 7.6$  Hz, 1H), 6.78-6.76 (d,  $J = 8.4$  Hz, 1H), 4.91-4.86 (m, 1H), 3.81 (s, 3H), 1.82-1.71 (m, 2H), 1.03-1.00 (t,  $J = 5.6$  Hz, 6H);  $^{13}\text{C}$  NMR (100 MHz,  $\text{CDCl}_3$ )  $\delta$  173.7, 165.7, 160.7, 151.1, 135.8, 135.2, 133.8, 130.9, 129.9, 124.8, 123.3, 122.3, 121.6, 121.0, 116.7, 52.7, 51.5, 41.8, 25.1, 22.9, 22.1; HRMS calculated for  $\text{C}_{21}\text{H}_{21}\text{NNaO}_5$  ( $\text{M} + \text{Na}^+$ ): 390.1317, found: 390.1312. (Yellow oil, 16.0 mg, 72% isolated yield)

**Methyl-3,3-dimethyl-2-(6-oxo-6*H*-benzo[*c*]chromene-3-carboxamido) butan-oate (11):**  $^1\text{H}$  NMR (400 MHz,  $\text{CDCl}_3$ )  $\delta$  8.42-8.40 (m, 1H), 8.15-8.11 (t,  $J = 9.2$  Hz, 2H), 7.88-7.84 (m, 1H), 7.76-7.74 (m, 2H), 7.66-7.63 (m, 1H), 4.71-4.69 (d,  $J = 9.6$  Hz, 1H), 3.77 (s, 3H), 3.71 (s, 1H), 1.07 (s, 9H);  $^{13}\text{C}$  NMR (100 MHz,  $\text{CDCl}_3$ )  $\delta$  172.1, 165.7, 160.7, 151.1, 136.1, 135.2, 133.8, 130.9, 130.0, 123.4, 123.2, 122.3, 121.6, 121.0, 116.6, 60.6, 52.2, 43.5, 35.3, 26.8; HRMS calculated for  $\text{C}_{21}\text{H}_{21}\text{NNaO}_5$  ( $\text{M} +$

Na<sup>+</sup>): 390.1317, found: 390.1312. (Yellow solid, 16.6 mg, 73% isolated yield)

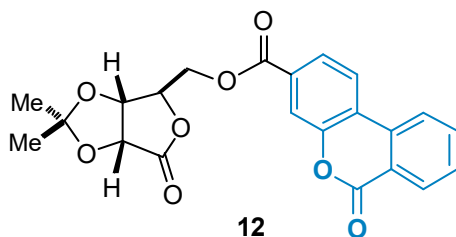

**2,2-dimethyl-6-oxotetrahydrofuro[3,4-*d*][1,3]dioxol-4-yl)methyl-6-oxo-6*H*-benzo[*c*]chromene-3-carboxylate (12):** <sup>1</sup>H NMR (400 MHz, CDCl<sub>3</sub>) δ 8.44-8.41 (dd, *J*<sub>1</sub> = 1.2 Hz, *J*<sub>2</sub> = 8.0 Hz, 1H), 8.18-8.14 (m, 2H), 7.92-7.88 (m, 2H), 7.86-7.84 (dd, *J*<sub>1</sub> = 1.2 Hz, *J*<sub>2</sub> = 8.0 Hz, 1H), 7.71-7.67 (m, 1H), 4.95-4.93 (t, *J* = 2.8 Hz, 1H), 4.90-4.89 (d, *J* = 5.2 Hz, 1H), 4.87-4.85 (d, *J* = 5.6 Hz, 1H), 4.65-4.64 (d, *J* = 2.4 Hz, 2H); <sup>13</sup>C NMR (100 MHz, CDCl<sub>3</sub>) δ 173.4, 164.5, 160.4, 151.1, 135.3, 133.4, 130.9, 130.5, 125.1, 123.5, 122.8, 122.6, 121.9, 119.2, 114.2, 79.9, 77.8, 75.3, 64.4, 26.8, 25.7; HRMS calculated for C<sub>22</sub>H<sub>18</sub>NaO<sub>8</sub> (M + Na<sup>+</sup>): 433.0899, found: 433.0894. (White solid, 17.6 mg, 82% isolated yield)

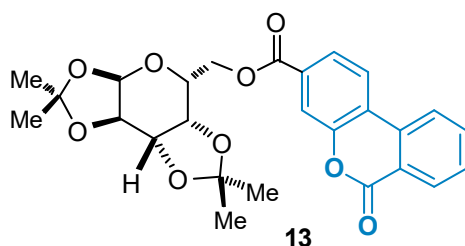

**2,2,7,7-tetramethyltetrahydro-5*H*-bis([1,3]dioxolo)[4,5-*b*:4',5'-*d*]pyran-5-yl)methyl 6-oxo-6*H*-benzo[*c*]chromene-3-carboxylate (13):** <sup>1</sup>H NMR (400 MHz, CDCl<sub>3</sub>) δ 8.46-8.44 (d, *J* = 7.6 Hz, 1H), 8.20-8.13 (q, *J* = 8.0 Hz, 2H), 8.03-8.01 (m, 2H), 7.91-7.87 (m, 1H), 7.69-7.66 (t, *J* = 7.2 Hz, 1H), 5.59-5.58 (d, *J* = 4.4 Hz, 1H), 4.69-4.67 (m, 1H), 4.56-4.52 (m, 2H), 4.38-4.34 (m, 2H), 4.23-4.20 (m, 1H), 1.55-1.50 (d, *J* = 22.0 Hz, 6H), 1.38-1.35 (d, *J* = 10.0 Hz, 6H); <sup>13</sup>C NMR (100 MHz, CDCl<sub>3</sub>) δ 165.2, 160.8, 151.0, 135.2, 133.8, 131.9, 130.9, 130.1, 125.5, 123.0, 122.5, 122.1, 121.9, 119.3, 109.9, 109.0, 96.4, 71.2, 70.8, 70.6, 66.1, 64.5, 26.2, 26.1, 25.1,

24.6; HRMS calculated for C<sub>26</sub>H<sub>26</sub>NaO<sub>9</sub> (M + Na<sup>+</sup>): 505.1475, found: 505.1469.  
(Yellow solid, 18.9 mg, 89% isolated yield)

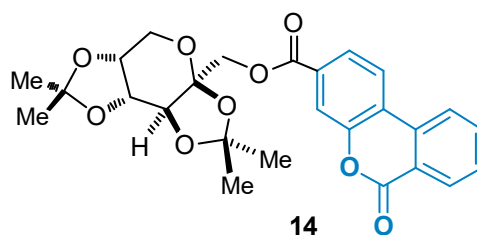

**2,2,7,7-tetramethyltetrahydro-3aH-bis([1,3]dioxolo)[4,5-b:4',5'-d]pyran-3a-yl methyl 6-oxo-6H-benzo[c]chromene-3-carboxylate (14):** <sup>1</sup>H NMR (400 MHz, CDCl<sub>3</sub>) δ 8.46-8.44 (m, 1H), 8.20-8.15 (m, 2H), 8.08-8.04 (m, 2H), 7.92-7.87 (m, 1H), 7.70-7.66 (m, 1H), 4.75-4.72 (d, *J* = 12.0 Hz, 1H), 4.69-4.66 (m, 1H), 4.49-4.48 (d, *J* = 2.8 Hz, 1H), 4.39-4.36 (d, *J* = 11.6 Hz, 1H), 4.30-4.27 (m, 1H), 4.00-3.96 (m, 1H), 3.84-3.81 (d, *J* = 13.4 Hz, 1H), 1.57 (s, 3H), 1.49 (s, 3H), 1.40 (s, 3H), 1.37 (s, 3H); <sup>13</sup>C NMR (100 MHz, CDCl<sub>3</sub>) δ 164.8, 160.7, 151.0, 137.5, 135.2, 130.9, 130.3, 130.2, 125.6, 123.1, 122.5, 122.2, 121.9, 119.3, 109.3, 109.0, 101.6, 70.8, 70.7, 70.2, 65.9, 61.5, 26.6, 26.0, 25.7, 24.1; HRMS calculated for C<sub>26</sub>H<sub>26</sub>NaO<sub>9</sub> (M + Na<sup>+</sup>): 505.1475, found: 505.1469. (Yellow oil, 19.0 mg, 80% isolated yield)

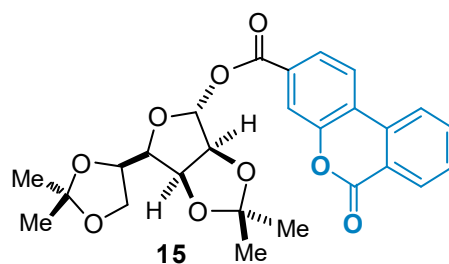

**2,2-dimethyl-1,3-dioxolan-4-yl-2,2-dimethyltetrahydro-furo[3,4-d][1,3]dioxol-4-yl 6-oxo-6H-benzo[c]chromene-3-carboxylate (15):** <sup>1</sup>H NMR (400 MHz, CDCl<sub>3</sub>) δ 8.47-8.45 (d, *J* = 7.6 Hz, 1H), 8.21-8.15 (m, 2H), 8.00-7.98 (m, 2H), 7.92-7.89 (t, *J* = 7.6 Hz, 1H), 7.71-7.68 (t, *J* = 7.2 Hz, 1H), 6.41 (s, 1H), 5.00-4.98 (m, 1H), 4.92-4.91 (m, 1H), 4.47-4.46 (m, 1H), 4.18-4.06 (m, 3H), 1.55-1.48 (d, *J* = 24.8 Hz, 6H), 1.40 (s, 6H); <sup>13</sup>C NMR (100 MHz, CDCl<sub>3</sub>) δ 163.8, 160.6, 151.0, 137.6, 135.2, 133.6, 131.2,

130.9, 130.3, 125.6, 123.2, 122.6, 121.9, 119.4, 113.6, 109.5, 102.0, 85.3, 82.8, 79.4, 72.9, 66.9, 27.1, 26.1, 25.2, 24.8; HRMS calculated for C<sub>26</sub>H<sub>26</sub>NaO<sub>9</sub> (M + Na<sup>+</sup>): 505.1475, found: 505.1469. (Yellow solid, 18.1 mg, 85% isolated yield)

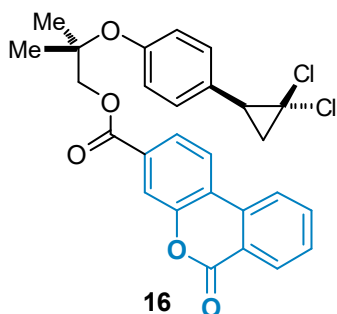

**2-(4-(2,2-dichlorocyclopropyl)phenoxy)-2-methylpropyl-6-oxo-6H-benzo[c]chromene-3-carboxylate (16):** <sup>1</sup>H NMR (400 MHz, CDCl<sub>3</sub>) δ 8.47-8.45 (dd, *J*<sub>1</sub> = 1.6 Hz, *J*<sub>2</sub> = 8.0 Hz, 1H), 8.21-8.16 (m, 2H), 8.04-8.02 (m, 2H), 7.92-7.88 (m, 1H), 7.71-7.67 (m, 1H), 7.18-7.16 (m, 2H), 7.05-7.02 (m, 2H), 4.40 (s, 2H), 2.90-2.86 (m, 1H), 2.00-1.94 (m, 1H), 1.83-1.79 (m, 1H), 1.45 (s, 6H); <sup>13</sup>C NMR (100 MHz, CDCl<sub>3</sub>) δ 165.1, 160.7, 154.1, 151.0, 135.2, 133.8, 131.8, 130.9, 130.4, 130.2, 129.7, 125.5, 124.1, 123.1, 122.5, 122.2, 121.9, 119.2, 78.9, 70.7, 60.9, 35.0, 26.0, 24.3; HRMS calculated for C<sub>27</sub>H<sub>22</sub>Cl<sub>2</sub>NaO<sub>5</sub> (M + Na<sup>+</sup>): 519.0742, found: 519.0737. (Pale yellow solid, 11.0 mg, 51% isolated yield)

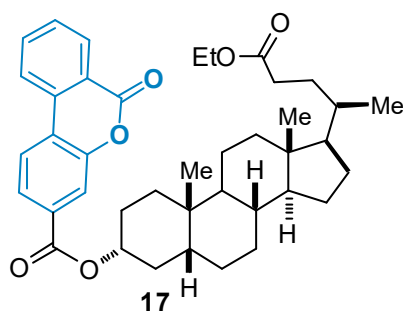

**17-(5-ethoxy-5-oxopentan-2-yl)-10,13-dimethylhexadecahydro-1H-cyclopenta[a]phenanthren-3-yl 6-oxo-6H-benzo[c]chromene-3-carboxylate (17):** <sup>1</sup>H NMR (400 MHz, CDCl<sub>3</sub>) δ 8.46-8.44 (dd, *J*<sub>1</sub> = 1.2 Hz, *J*<sub>2</sub> = 8.0 Hz, 1H), 8.20-8.18 (d, *J* = 8.4 Hz, 1H), 8.14-8.12 (d, *J* = 8.4 Hz, 1H), 8.04-8.00 (m, 2H), 7.91-7.86 (m, 1H), 7.69-7.65

(m, 1H), 5.04-4.98 (m, 1H), 4.15-4.10 (q,  $J = 7.2$  Hz, 2H), 2.37-2.31 (m, 1H), 2.25-2.17 (m, 1H), 2.06-1.97 (m, 2H), 1.92-1.78 (m, 3H), 1.61 (s, 3H), 1.49-1.38 (m, 4H), 1.28-1.22 (m, 11H), 1.18-1.07 (m, 6H), 0.98 (s, 3H), 0.94-0.92 (d,  $J = 6.4$  Hz, 1H), 0.67 (s, 3H);  $^{13}\text{C}$  NMR (100 MHz,  $\text{CDCl}_3$ )  $\delta$  174.5, 174.5, 164.9, 160.8, 151.0, 135.1, 133.9, 132.8, 130.9, 130.0, 125.4, 122.9, 122.5, 121.9, 121.8, 119.2, 75.9, 60.3, 56.6, 56.1, 42.8, 42.1, 40.6, 40.2, 35.9, 35.4, 35.1, 34.7, 32.4, 31.4, 31.1, 28.3, 27.1, 26.8, 26.4, 24.3, 23.5, 21.0, 18.4, 14.4, 12.1; HRMS calculated for  $\text{C}_{40}\text{H}_{50}\text{NaO}_6$  ( $\text{M} + \text{Na}^+$ ): 649.3505, found: 649.3500. (Pale yellow solid, 12.4 mg, 58% isolated yield)

## Synthetic applications

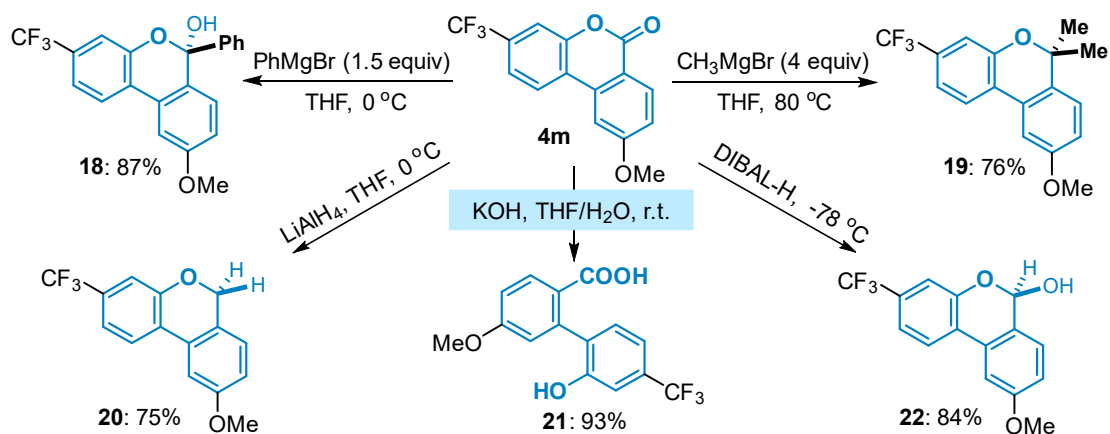

### <sup>1</sup>H, <sup>13</sup>C and <sup>19</sup>F spectra data of compounds 18-22

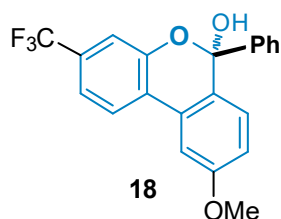

**9-methoxy-6-phenyl-3-(trifluoromethyl)-6H-benzo[c]chromen-6-ol (18):** <sup>1</sup>H NMR (400 MHz, CDCl<sub>3</sub>) δ 7.32-7.29 (m, 2H), 7.27-7.25 (m, 1H), 7.19-7.14 (m, 1H), 7.07 (s, 1H), 6.98-6.96 (m, 1H), 6.84-6.82 (d, *J* = 8.4 Hz, 1H), 6.79-6.72 (m, 2H), 6.61-6.60 (d, *J* = 2.4 Hz, 1H), 6.32-6.30 (d, *J* = 8.0 Hz, 1H), 3.76 (s, 3H); <sup>13</sup>C NMR (100 MHz, CDCl<sub>3</sub>) δ 158.9, 153.2, 146.3, 145.6, 138.4, 137.2, 134.3, 131.4, 131.3, 130.7, 130.4, 128.3, 128.2, 127.9, 127.8, 127.2, 125.3, 122.6, 118.3, 116.4, 116.3, 113.5, 113.4, 112.7, 82.9, 55.4; <sup>19</sup>F NMR (376 MHz, CDCl<sub>3</sub>) δ -62.53; HRMS calculated for C<sub>21</sub>H<sub>16</sub>F<sub>3</sub>O<sub>3</sub> (M + H<sup>+</sup>): 373.1052, found: 373.1046. (Pale yellow solid, 33.0 mg, 87% isolated yield)



**9-methoxy-6,6-dimethyl-3-(trifluoromethyl)-6*H*-benzo[*c*]chromene (19):** <sup>1</sup>H NMR (400 MHz, CDCl<sub>3</sub>) δ 7.51-7.49 (d, *J* = 8.4 Hz, 1H), 7.26-7.20 (m, 3H), 6.92-6.89 (dd, *J*<sub>1</sub> = 2.8 Hz, *J*<sub>2</sub> = 8.4 Hz, 1H), 6.58-6.57 (d, *J* = 2.4 Hz, 1H), 3.78 (s, 3H), 1.62 (s, 3H), 1.34 (s, 3H); <sup>13</sup>C NMR (100 MHz, CDCl<sub>3</sub>) δ 158.5, 153.4, 137.9, 135.8, 131.4, 131.1, 127.5, 125.3, 122.6, 118.0, 117.1, 117.0, 114.2, 113.9, 73.7, 55.4, 32.0, 31.4; <sup>19</sup>F NMR (376 MHz, CDCl<sub>3</sub>) δ -62.45; HRMS calculated for C<sub>17</sub>H<sub>16</sub>F<sub>3</sub>O<sub>2</sub> (M + H<sup>+</sup>): 309.1102, found: 309.1097. (White solid, 41.0 mg, 76% isolated yield)

**9-methoxy-3-(trifluoromethyl)-6*H*-benzo[*c*]chromene (20):** <sup>1</sup>H NMR (400 MHz, CDCl<sub>3</sub>) δ 7.40-7.38 (d, *J* = 8.8 Hz, 1H), 7.25-7.17 (m, 3H), 6.95-6.92 (dd, *J*<sub>1</sub> = 2.4 Hz, *J*<sub>2</sub> = 8.4 Hz, 1H), 6.74-6.73 (d, *J* = 2.4 Hz, 1H), 4.36 (s, 2H), 3.80 (s, 3H); <sup>13</sup>C NMR (100 MHz, CDCl<sub>3</sub>) δ 159.8, 153.6, 137.6, 131.9, 131.5, 131.4, 130.4, 129.1, 128.3, 125.4, 117.5, 116.0, 114.5, 113.8, 63.3, 55.5; <sup>19</sup>F NMR (376 MHz, CDCl<sub>3</sub>) δ -62.57; HRMS calculated for C<sub>15</sub>H<sub>12</sub>F<sub>3</sub>O<sub>2</sub> (M + H<sup>+</sup>): 281.0789, found: 281.0784. (Brown solid, 38.0 mg, 75% isolated yield)

**2'-hydroxy-5-methoxy-4'-(trifluoromethyl)-[1,1'-biphenyl]-2-carboxylic acid (21):**

$^1\text{H}$  NMR (400 MHz,  $\text{CDCl}_3$ )  $\delta$  8.37-8.35 (d,  $J = 8.8$  Hz, 1H), 8.12-8.10 (d,  $J = 8.4$  Hz, 1H), 7.60-7.55 (m, 2H), 7.51 (s, 1H), 7.19-7.17 (d,  $J = 9.2$  Hz, 1H), 4.02 (s, 3H);  $^{13}\text{C}$  NMR (100 MHz,  $\text{CDCl}_3$ )  $\delta$  165.1, 160.2, 151.4, 135.6, 133.3, 123.7, 121.1, 120.9, 117.2, 115.4, 114.7, 106.0, 56.0;  $^{19}\text{F}$  NMR (376 MHz,  $\text{CDCl}_3$ )  $\delta$  -62.69; HRMS calculated for  $\text{C}_{15}\text{H}_{12}\text{F}_3\text{O}_4$  ( $\text{M} + \text{H}^+$ ): 313.0688, found: 313.0682. (White solid, 22.2 mg, 75% isolated yield)

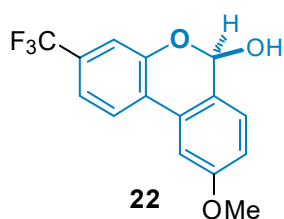

**(*R*)-9-methoxy-3-(trifluoromethyl)-6*H*-benzo[*c*]chromen-6-ol (22):**  $^1\text{H}$  NMR (400 MHz,  $\text{CDCl}_3$ )  $\delta$  7.43-7.42 (d,  $J = 8.8$  Hz, 1H), 7.24 (s, 3H), 6.99-6.96 (dd,  $J_1 = 2.8$  Hz,  $J_2 = 8.8$  Hz, 1H), 6.75-6.74 (d,  $J = 2.8$  Hz, 1H), 4.42-4.41 (d,  $J = 6.4$  Hz, 1H), 3.82 (s, 3H);  $^{13}\text{C}$  NMR (100 MHz,  $\text{CDCl}_3$ )  $\delta$  159.9, 153.6, 137.3, 131.9, 131.5, 131.4, 130.4, 117.5, 116.0, 114.7, 114.2, 63.4, 55.5;  $^{19}\text{F}$  NMR (376 MHz,  $\text{CDCl}_3$ )  $\delta$  -62.57; HRMS calculated for  $\text{C}_{15}\text{H}_{12}\text{F}_3\text{O}_3$  ( $\text{M} + \text{H}^+$ ): 297.0739, found: 297.0734. (Yellow oil, 43.0 mg, 84% isolated yield)

## Synthesis of benzocoumarins from peroxide, alcohol aldehyde, and carbonyl acid.

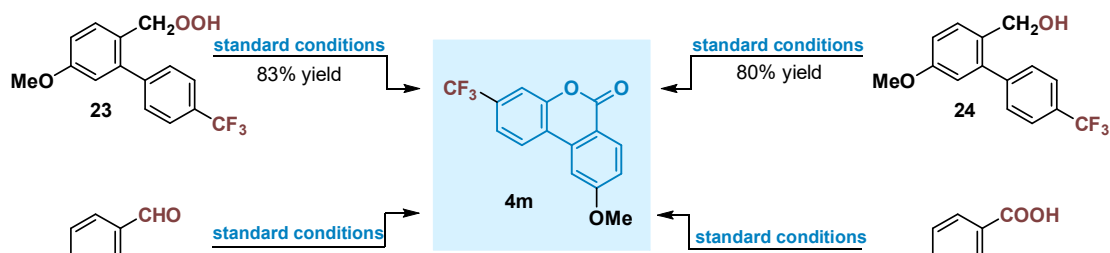

### $^1\text{H}$ , $^{13}\text{C}$ and $^{19}\text{F}$ spectra data of compounds 23-26

**2-(hydroperoxymethyl)-5-methoxy-4'-(trifluoromethyl)-1,1'-biphenyl (23):**  $^1\text{H}$  NMR (400 MHz,  $\text{CDCl}_3$ )  $\delta$  8.02 (s, 1H), 7.70-7.68 (d,  $J = 8.0$  Hz, 2H), 7.54-7.52 (d,  $J = 7.6$  Hz, 2H), 7.49-7.46 (d,  $J = 8.8$  Hz, 1H), 6.98-6.95 (dd,  $J_1 = 2.8$  Hz,  $J_2 = 8.4$  Hz, 1H), 6.84-6.83 (d,  $J = 2.8$  Hz, 1H), 4.83 (s, 2H), 3.85 (s, 3H);  $^{13}\text{C}$  NMR (100 MHz,  $\text{CDCl}_3$ )  $\delta$  159.8, 144.1, 143.5, 133.1, 129.9, 129.8, 129.6, 125.2, 125.1, 124.6, 122.9, 115.6, 113.7, 76.4, 55.5;  $^{19}\text{F}$  NMR (376 MHz,  $\text{CDCl}_3$ )  $\delta$  -62.99; HRMS calculated for  $\text{C}_{15}\text{H}_{13}\text{F}_3\text{O}_3$  ( $\text{M} + \text{H}^+$ ): 299.0895, found: 299.0890. (Yellow oil)

**(5-methoxy-4'-(trifluoromethyl)-[1,1'-biphenyl]-2-yl)methanol (24):**  $^1\text{H}$  NMR (400 MHz,  $\text{CDCl}_3$ )  $\delta$  7.70-7.68 (d,  $J = 8.0$  Hz, 2H), 7.55-7.53 (d,  $J = 8.0$  Hz, 2H), 7.47-7.45 (d,  $J = 8.0$  Hz, 1H), 6.98-6.95 (dd,  $J_1 = 2.8$  Hz,  $J_2 = 8.8$  Hz, 1H), 6.82-6.81 (d,  $J = 2.8$  Hz, 1H), 4.50 (s, 2H), 3.84 (s, 3H);  $^{13}\text{C}$  NMR (100 MHz,  $\text{CDCl}_3$ )  $\delta$  159.2,

144.4, 141.8, 130.9, 130.3, 129.6, 129.5, 125.3, 125.2, 115.5, 113.8, 62.7, 55.5;  $^{19}\text{F}$  NMR (376 MHz,  $\text{CDCl}_3$ )  $\delta$  -62.63; HRMS calculated for  $\text{C}_{15}\text{H}_{14}\text{F}_3\text{O}_2$  ( $\text{M} + \text{H}^+$ ): 283.0946, found: 283.0941. (Yellow oil)

**5-methoxy-4'-(trifluoromethyl)-[1,1'-biphenyl]-2-carbaldehyde (25):**  $^1\text{H}$  NMR (400 MHz,  $\text{CDCl}_3$ )  $\delta$  9.80 (s, 1H), 8.06-8.04 (d,  $J = 9.2$  Hz, 1H), 7.75-7.73 (d,  $J = 8.4$  Hz, 2H), 7.53-7.51 (d,  $J = 7.6$  Hz, 2H), 7.07-7.04 (m, 1H), 6.86-6.85 (d,  $J = 2.0$  Hz, 1H), 3.92 (s, 3H);  $^{13}\text{C}$  NMR (100 MHz,  $\text{CDCl}_3$ )  $\delta$  190.3, 163.7, 146.8, 141.7, 130.7, 130.3, 127.3, 125.5, 125.4, 115.5, 114.4, 55.8;  $^{19}\text{F}$  NMR (376 MHz,  $\text{CDCl}_3$ )  $\delta$  -63.06; HRMS calculated for  $\text{C}_{15}\text{H}_{12}\text{F}_3\text{O}_2$  ( $\text{M} + \text{H}^+$ ): 281.0789, found: 281.0784. (Yellow solid)

**5-methoxy-4'-(trifluoromethyl)-[1,1'-biphenyl]-2-carboxylic acid (26):**  $^1\text{H}$  NMR (400 MHz,  $\text{CDCl}_3$ )  $\delta$  8.07-8.05 (d,  $J = 8.8$  Hz, 1H), 7.64-7.62 (d,  $J = 7.6$  Hz, 2H), 7.42-7.40 (d,  $J = 8.4$  Hz, 2H), 6.97-6.95 (dd,  $J_1 = 2.4$  Hz,  $J_2 = 8.8$  Hz, 1H), 6.78-6.77 (d,  $J = 2.8$  Hz, 1H), 3.88 (s, 3H);  $^{13}\text{C}$  NMR (100 MHz,  $\text{CDCl}_3$ )  $\delta$  171.5, 162.7, 145.3, 134.0, 128.8, 128.7, 124.9, 120.5, 117.0, 113.2, 55.7;  $^{19}\text{F}$  NMR (376 MHz,  $\text{CDCl}_3$ )  $\delta$  -62.85; HRMS calculated for  $\text{C}_{15}\text{H}_{12}\text{F}_3\text{O}_3$  ( $\text{M} + \text{H}^+$ ): 297.0739, found: 297.0733. (Yellow solid)

## UV-Vis absorption experiments

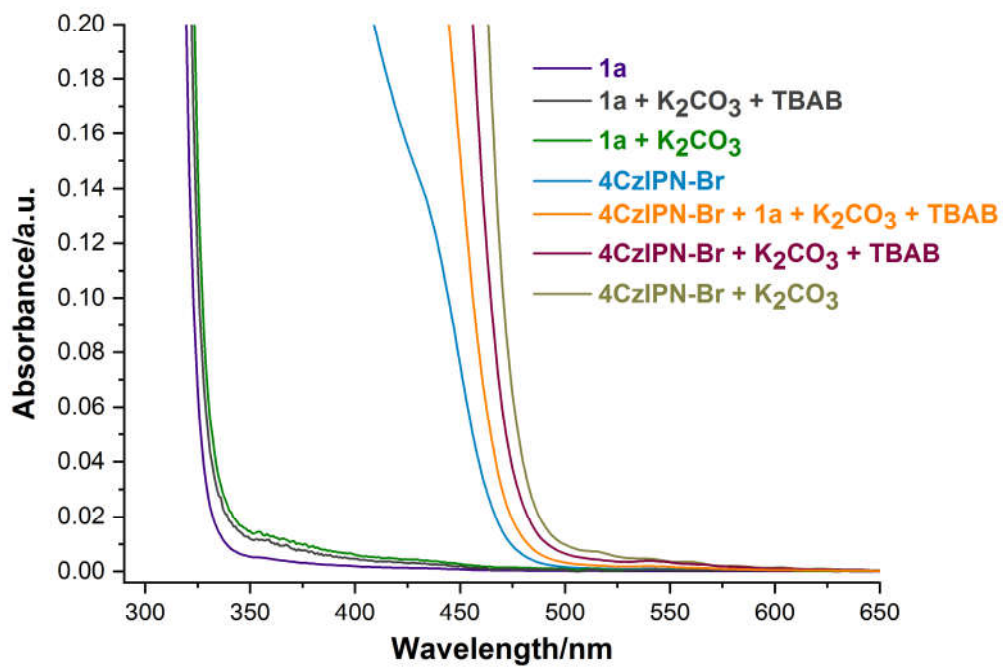

**Figure 1.** UV-Vis absorption spectra of the individual reaction components and the reaction mixtures

## Fluorescence quenching experiments

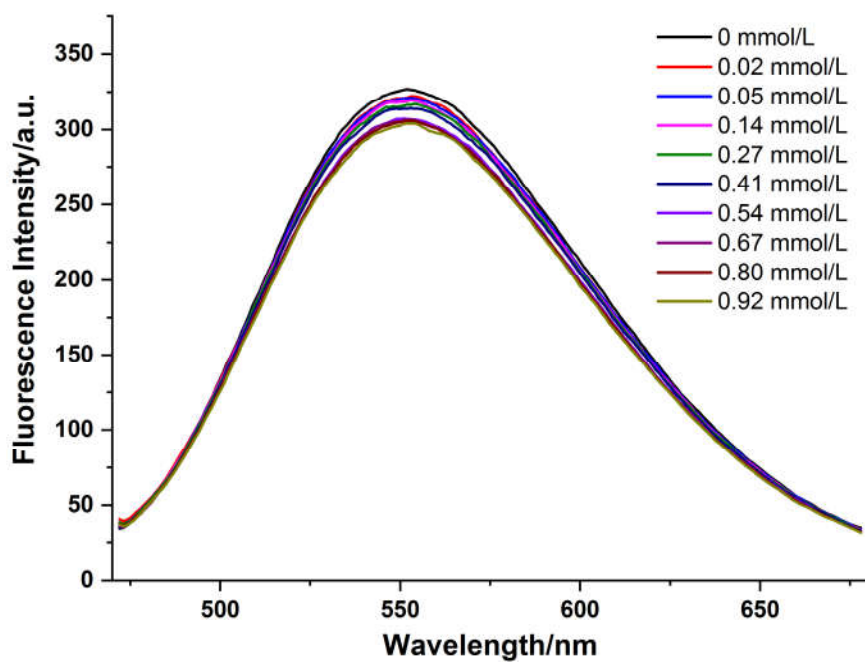

Figure 2. Fluorescence spectra of 4-BrCZIPN with different concentrations of substrate **1a**

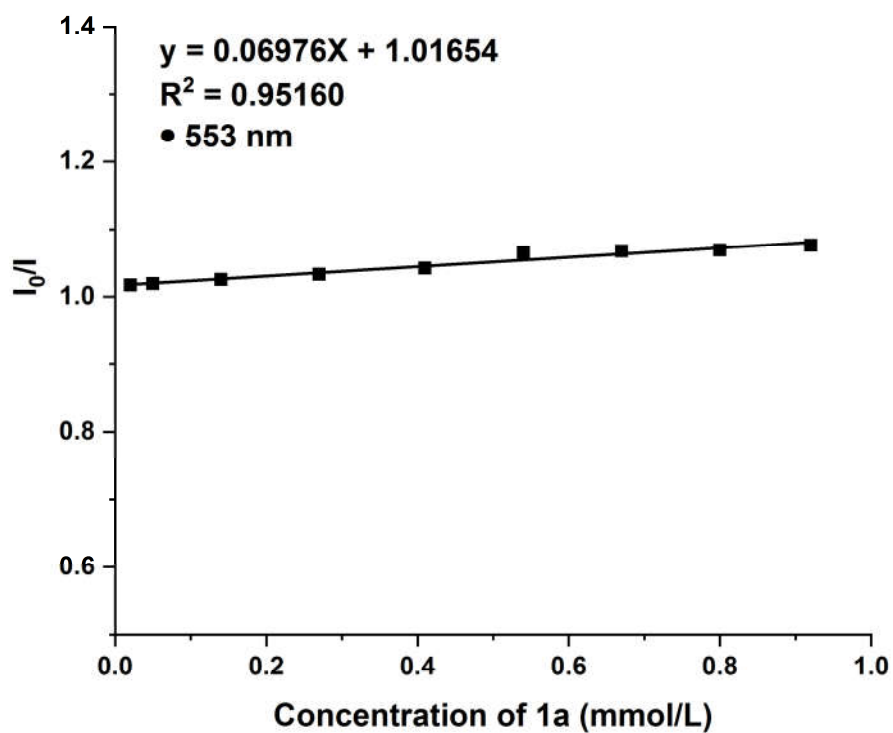

Figure 3. Stern Volmer plots of the substrate **1a**

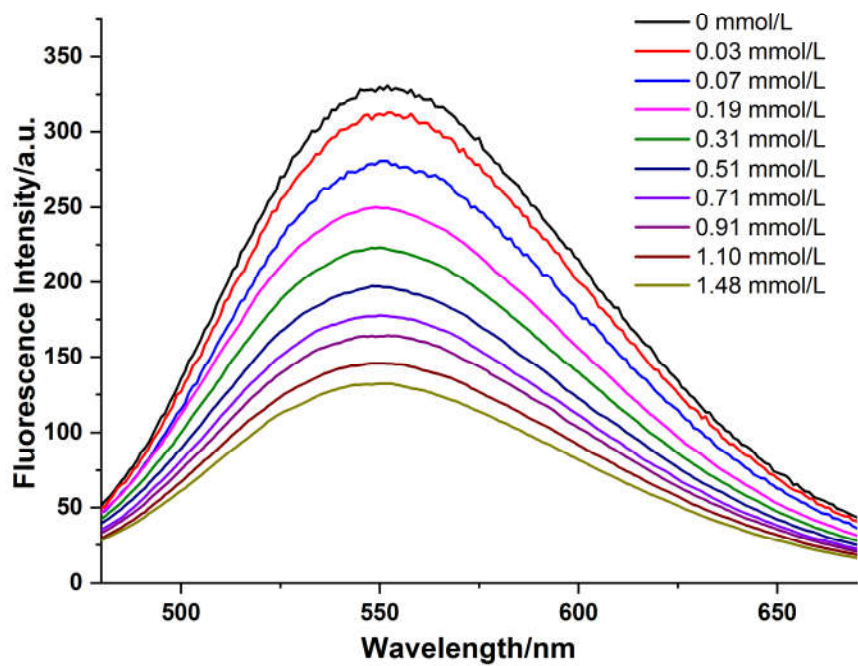

Figure 4. Fluorescence spectra of 4-BrCZIPN with different concentrations of substrate TBAB

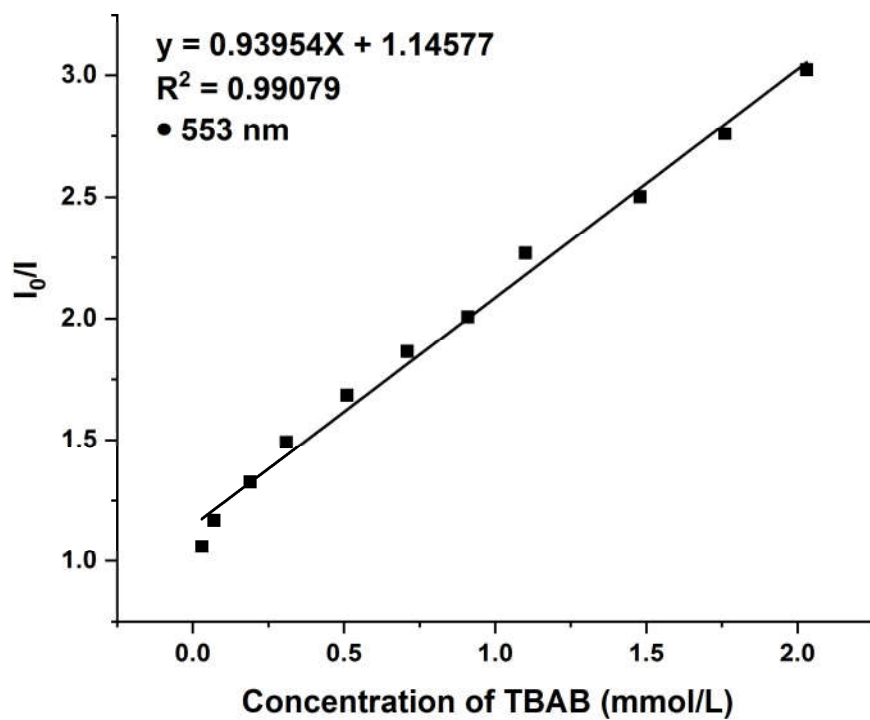

Figure 5. Stern Volmer plots of the TBAB

### CV curve of the substrate 1a

Cyclic voltammetry (CV) was performed using an Epsilon electrochemical workstation (a BASi three-electrode cell system): glassy carbon electrode as the working electrode, Pt wire as the counter electrode, Ag/AgCl (KCl, 3 M) electrode as the reference electrode, and ferrocenium/ferrocene ( $\text{Fc}^+/\text{Fc}$ ) as the internal standard. Scan rate:  $100 \text{ mV s}^{-1}$  (in the range  $-1.7$  to  $+2.4 \text{ V}$ ).  $n\text{Bu}_4\text{NPF}_6$  (0.1 M MeCN) was used as the supporting electrolyte.

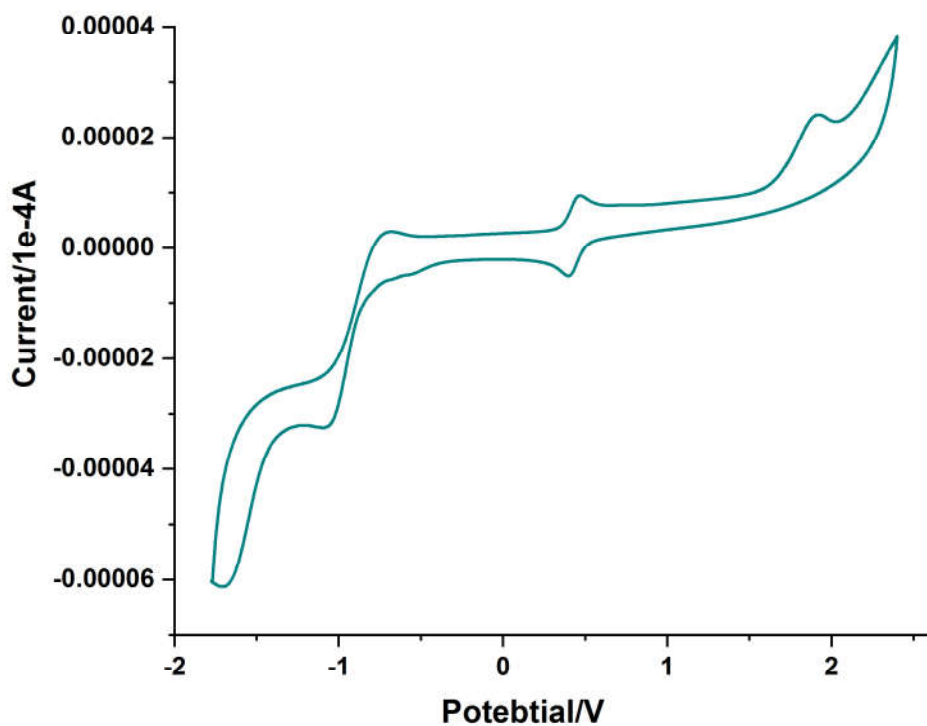

**Figure 6.** Cyclic voltammetry of the substrate **1a**



## In-situ NMR spectroscopic experiments

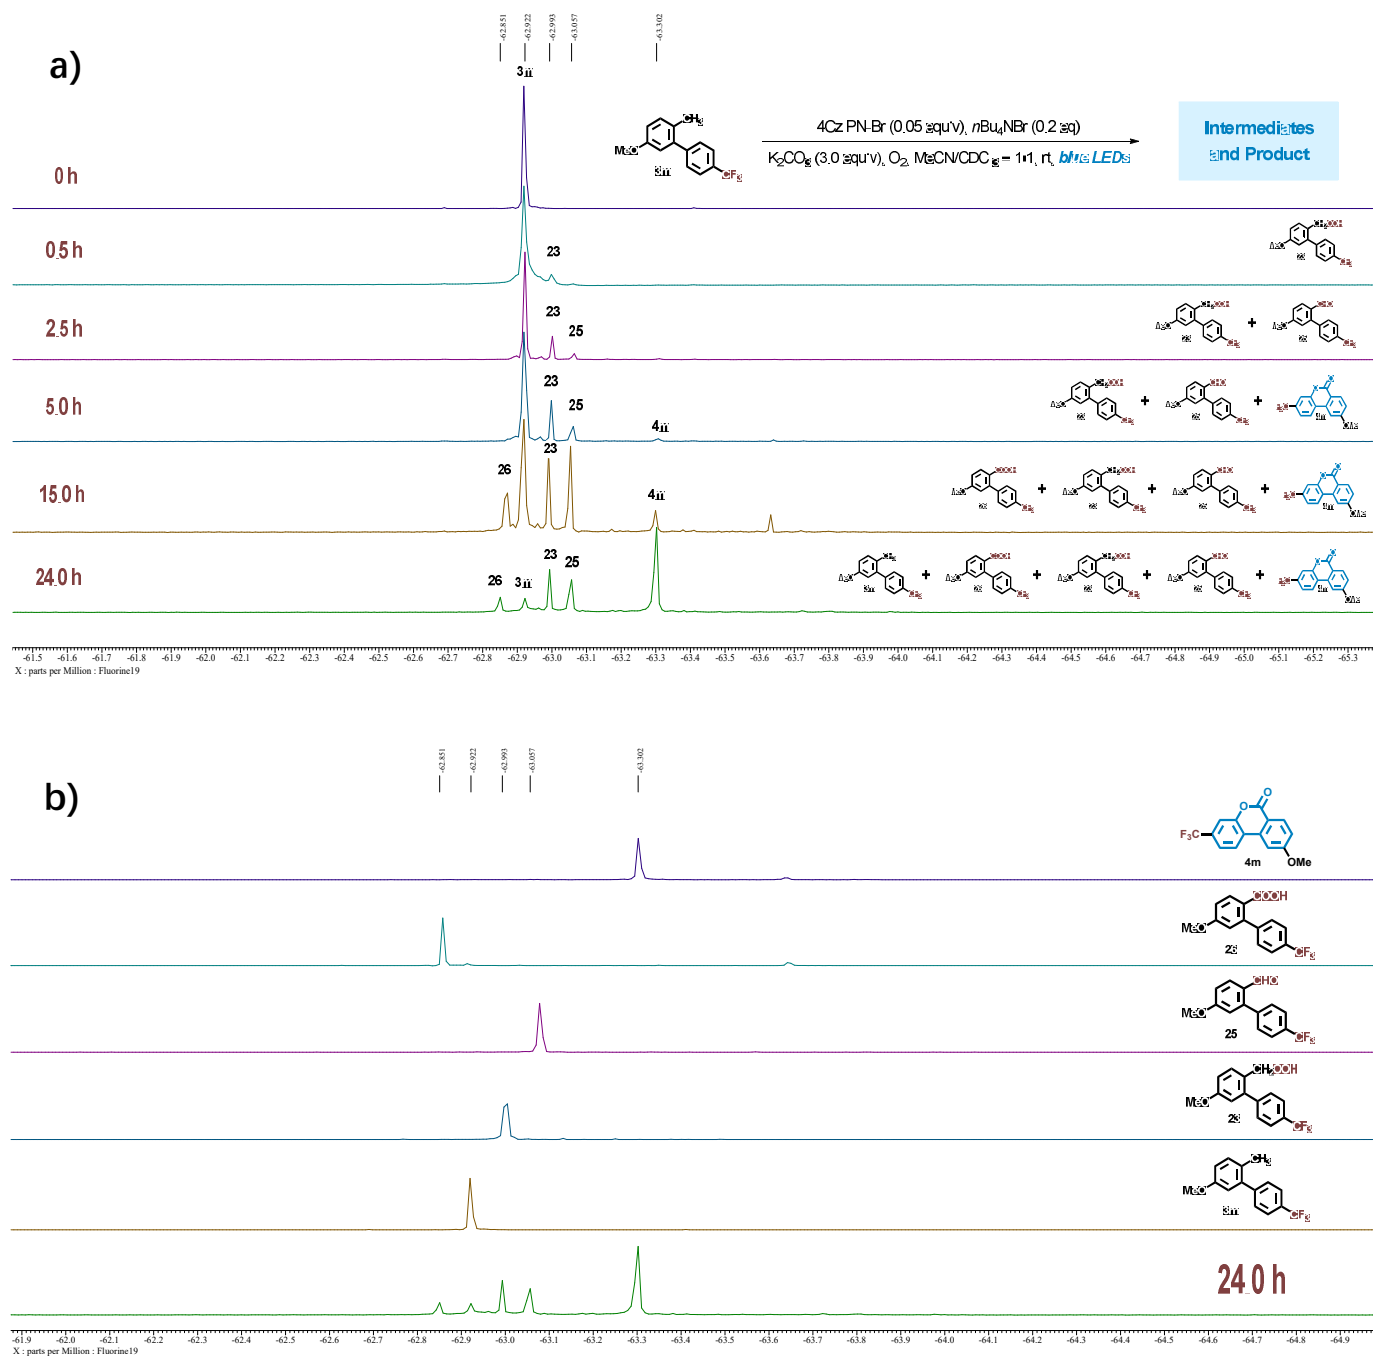

Figure 6. Reaction progress of **3m** monitored by in-situ <sup>19</sup>F-NMR

# High-resolution mass spectrum analysis of the reaction mixture (3m)

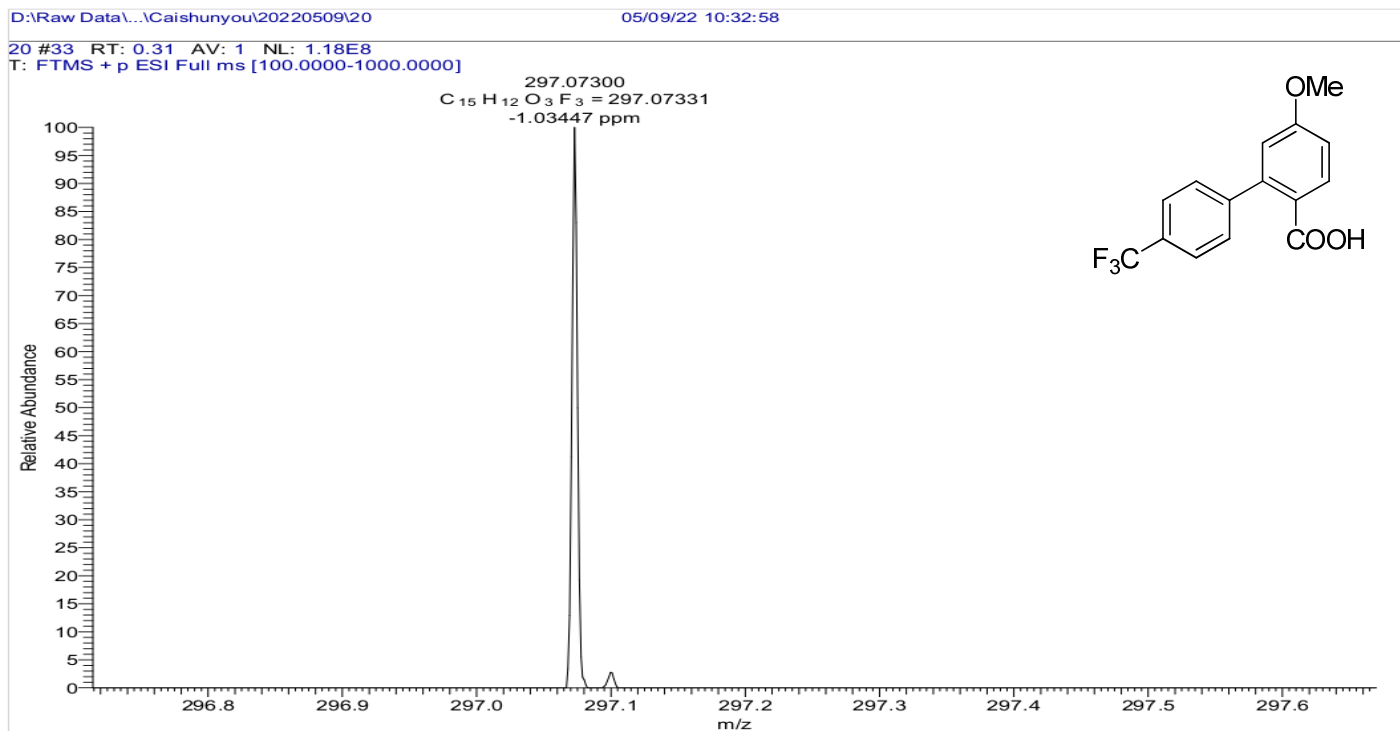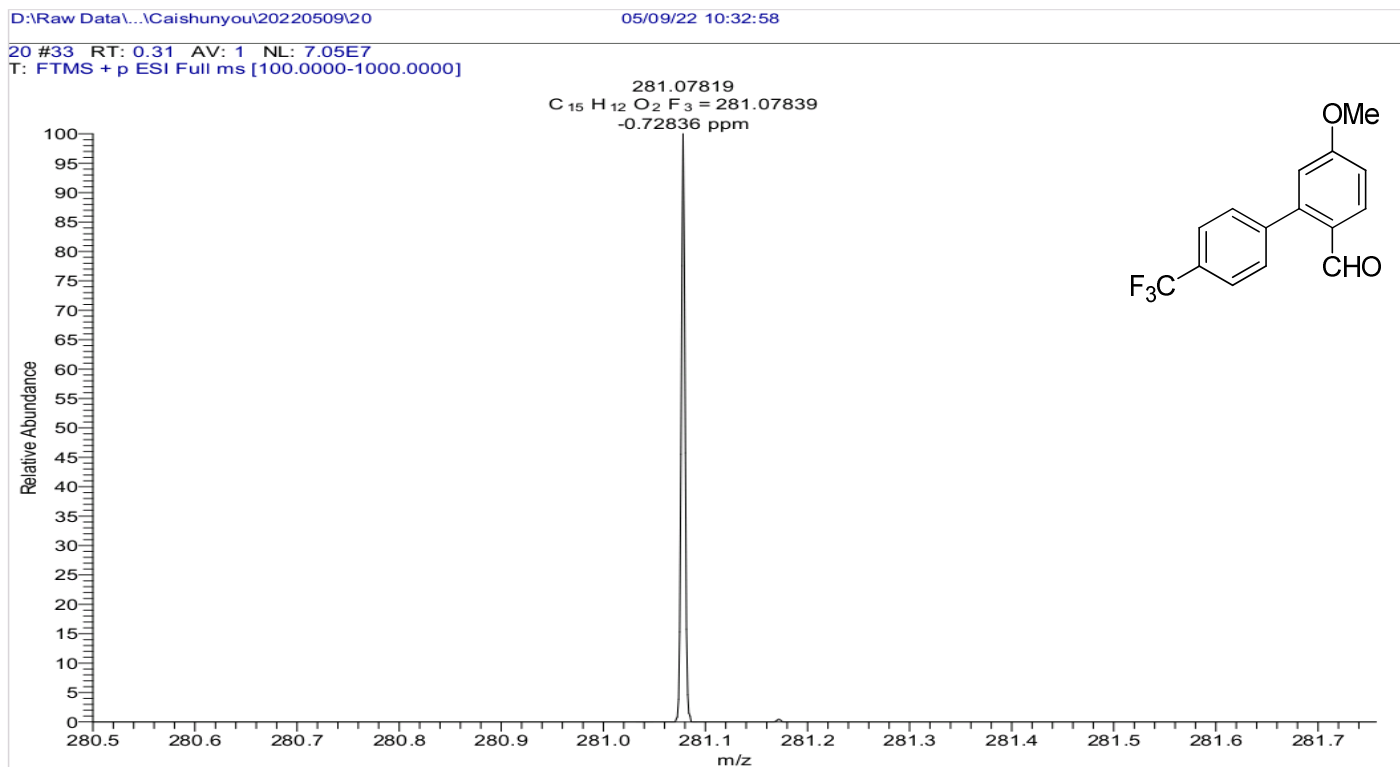

20 #33 RT: 0.31 AV: 1 NL: 2.08E6  
T: FTMS + p ESI Full ms [100.0000-1000.0000]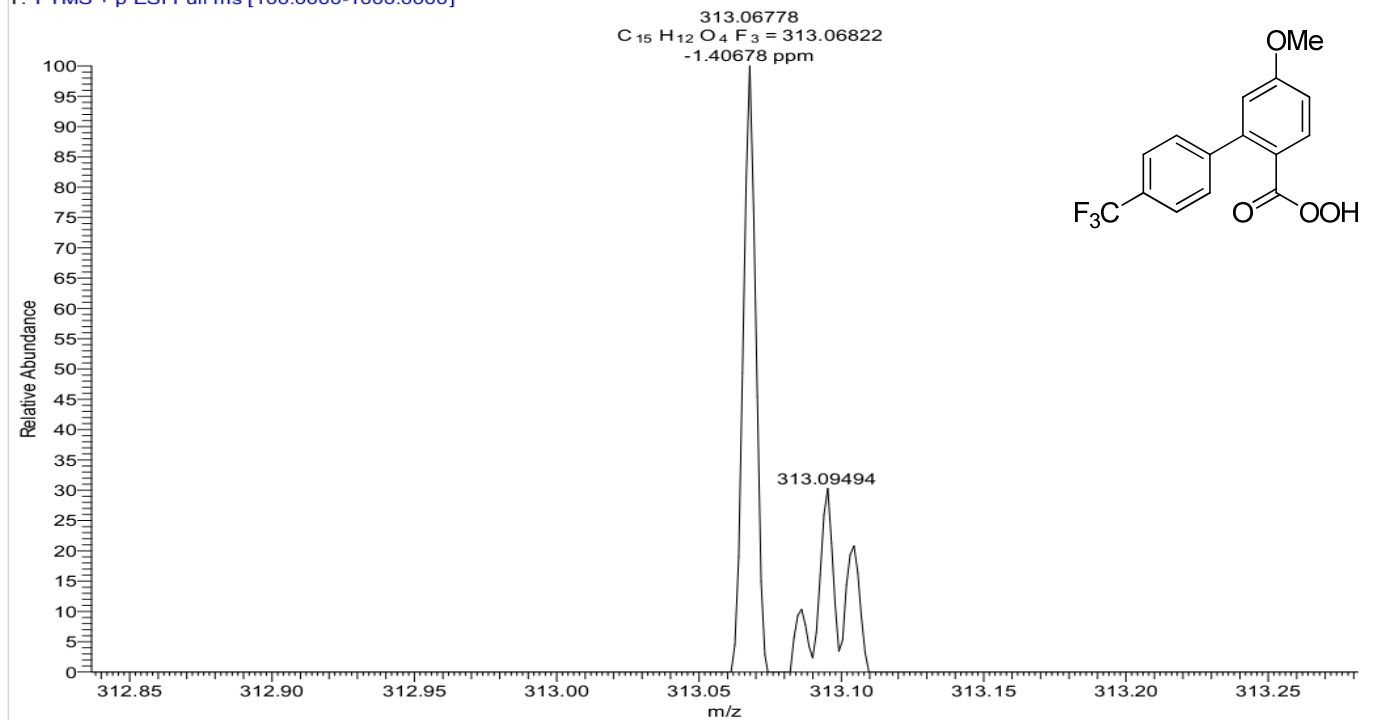20 #33 RT: 0.31 AV: 1 NL: 1.70E6  
T: FTMS + p ESI Full ms [100.0000-1000.0000]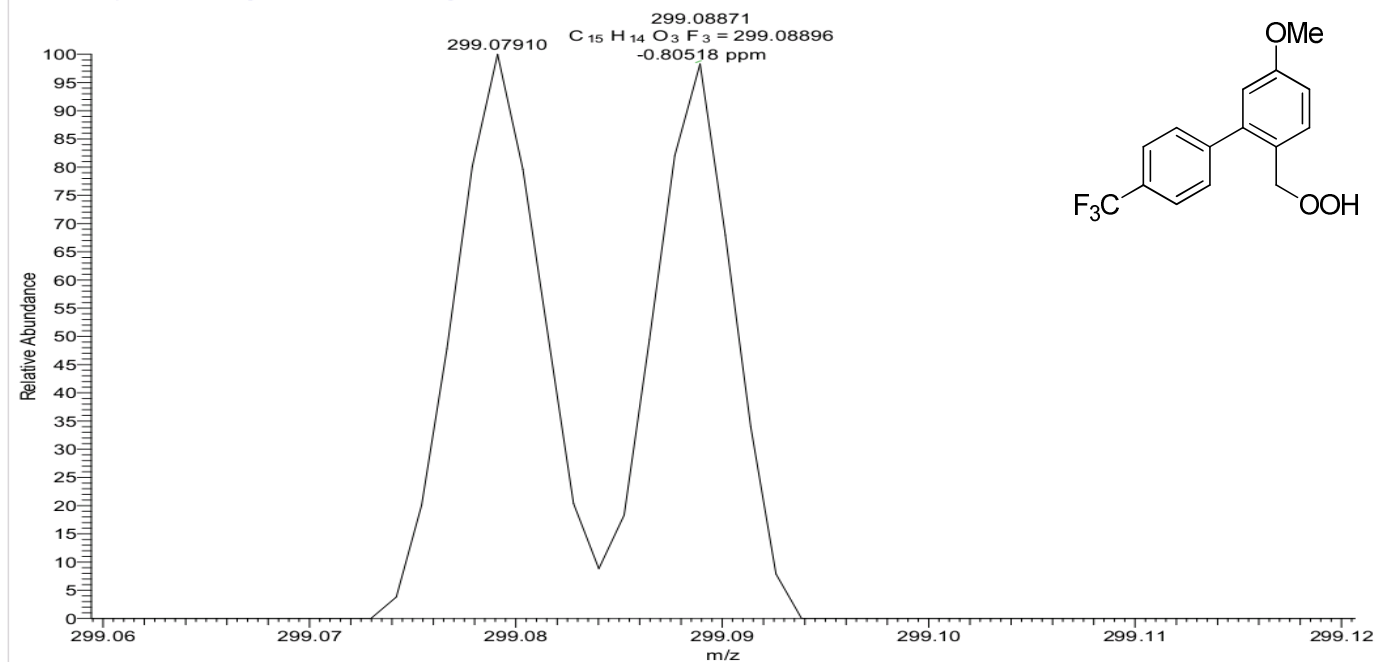

# Copies of $^1\text{H}$ NMR, $^{13}\text{C}$ NMR and $^{19}\text{F}$ NMR spectr

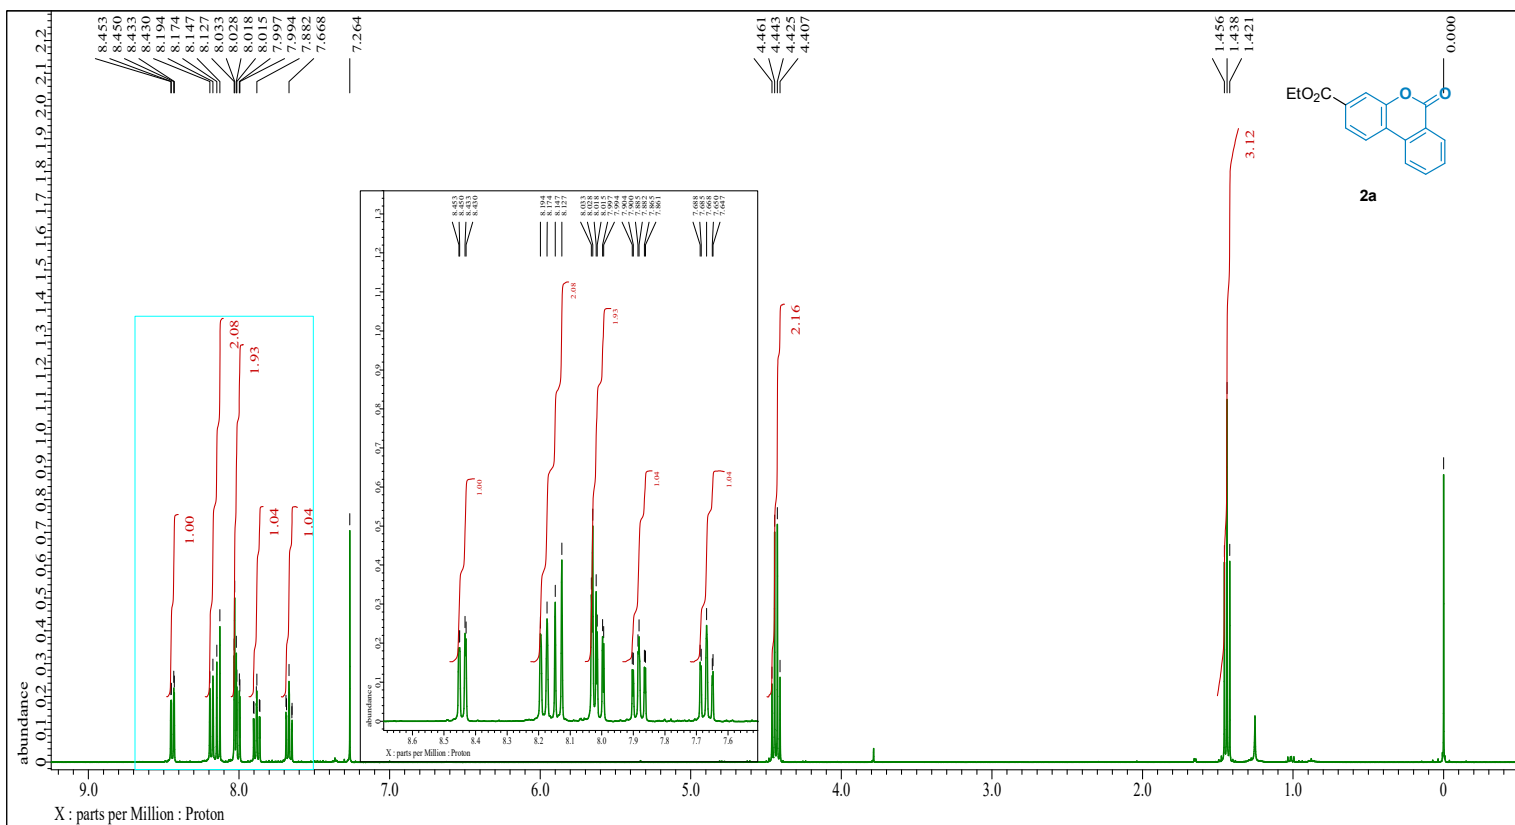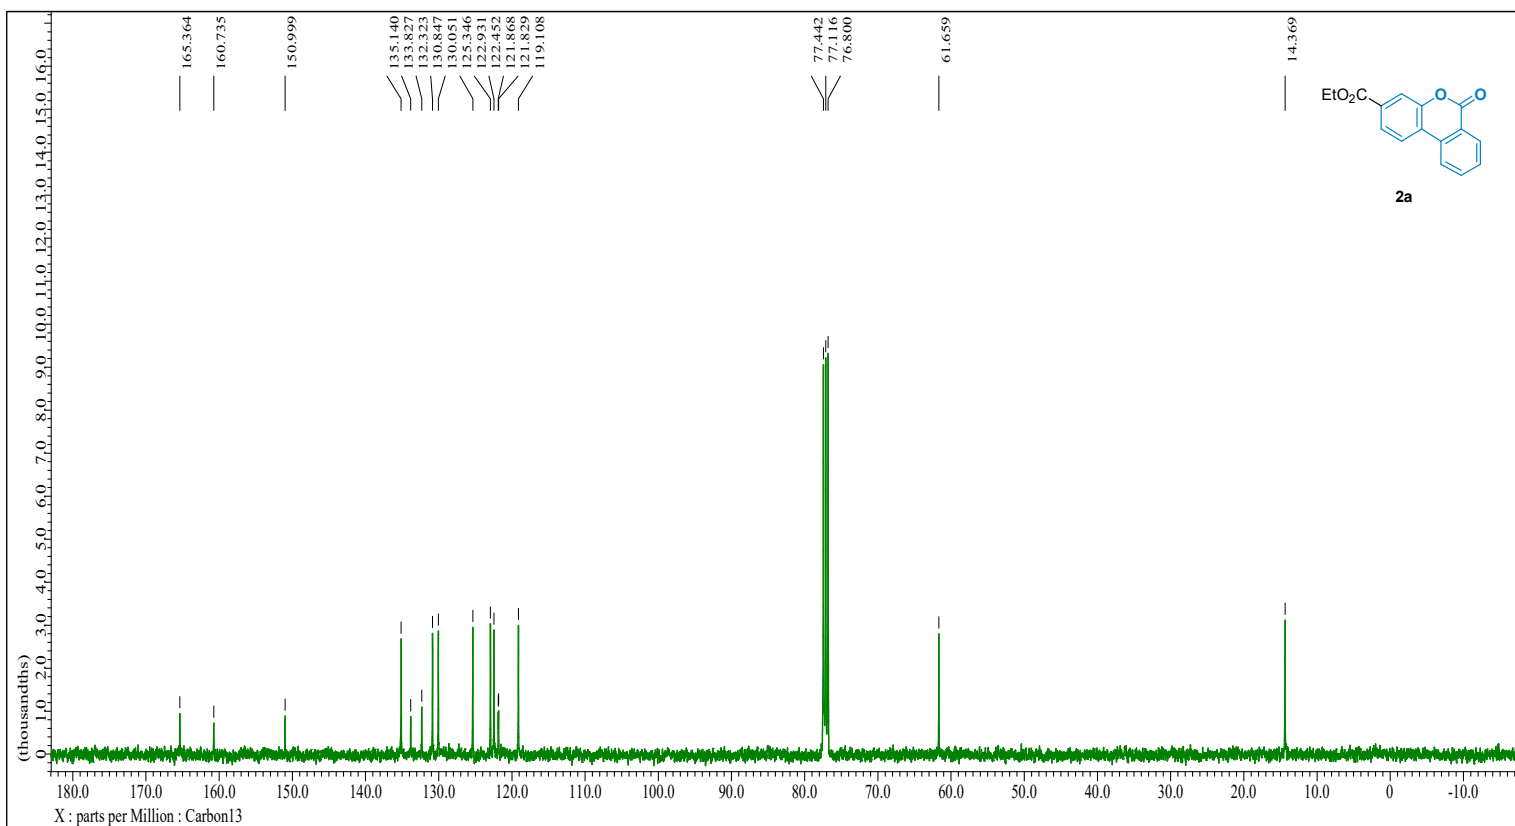

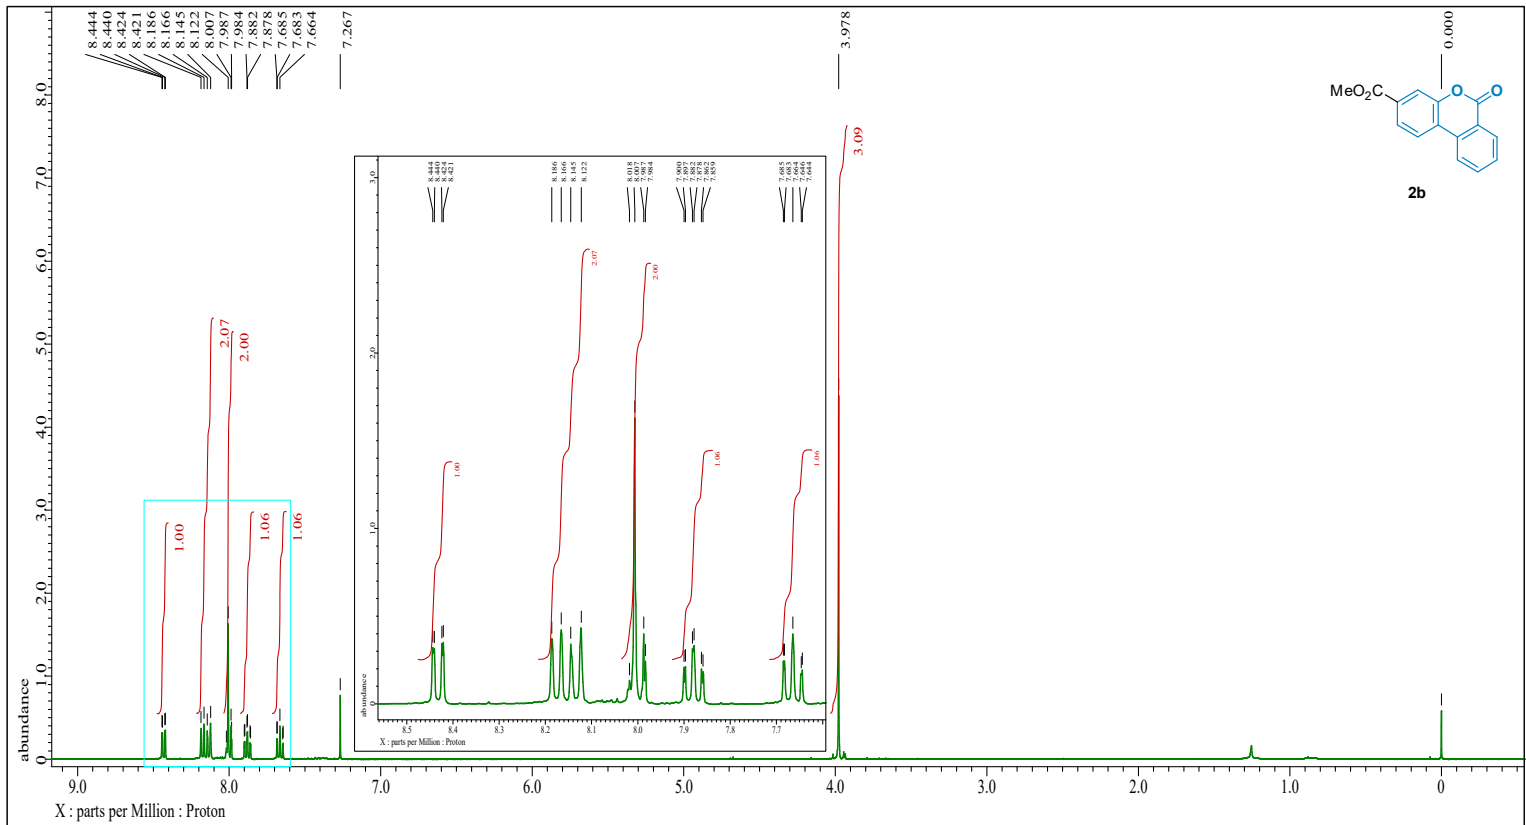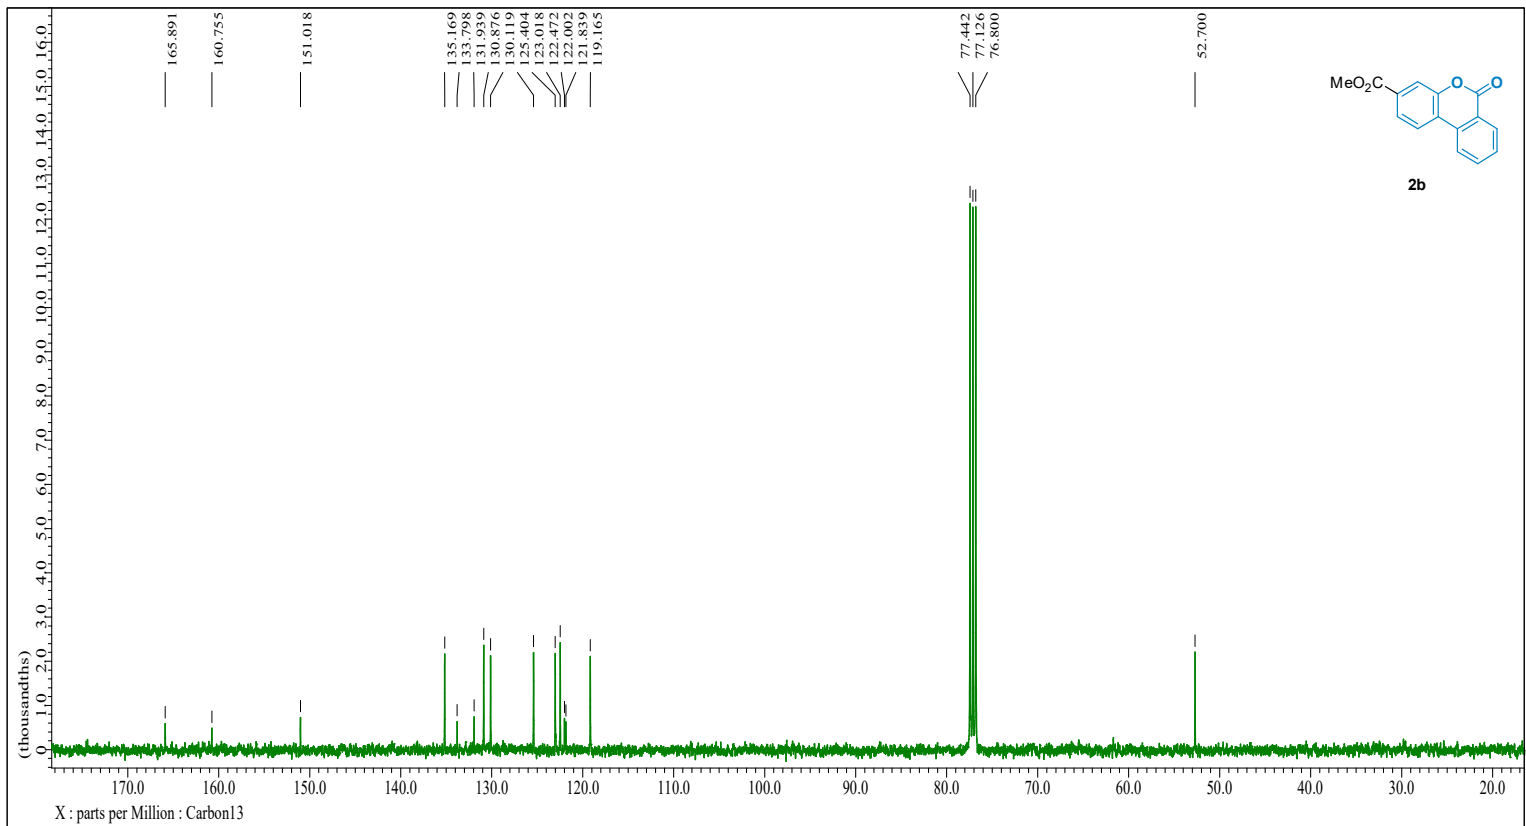

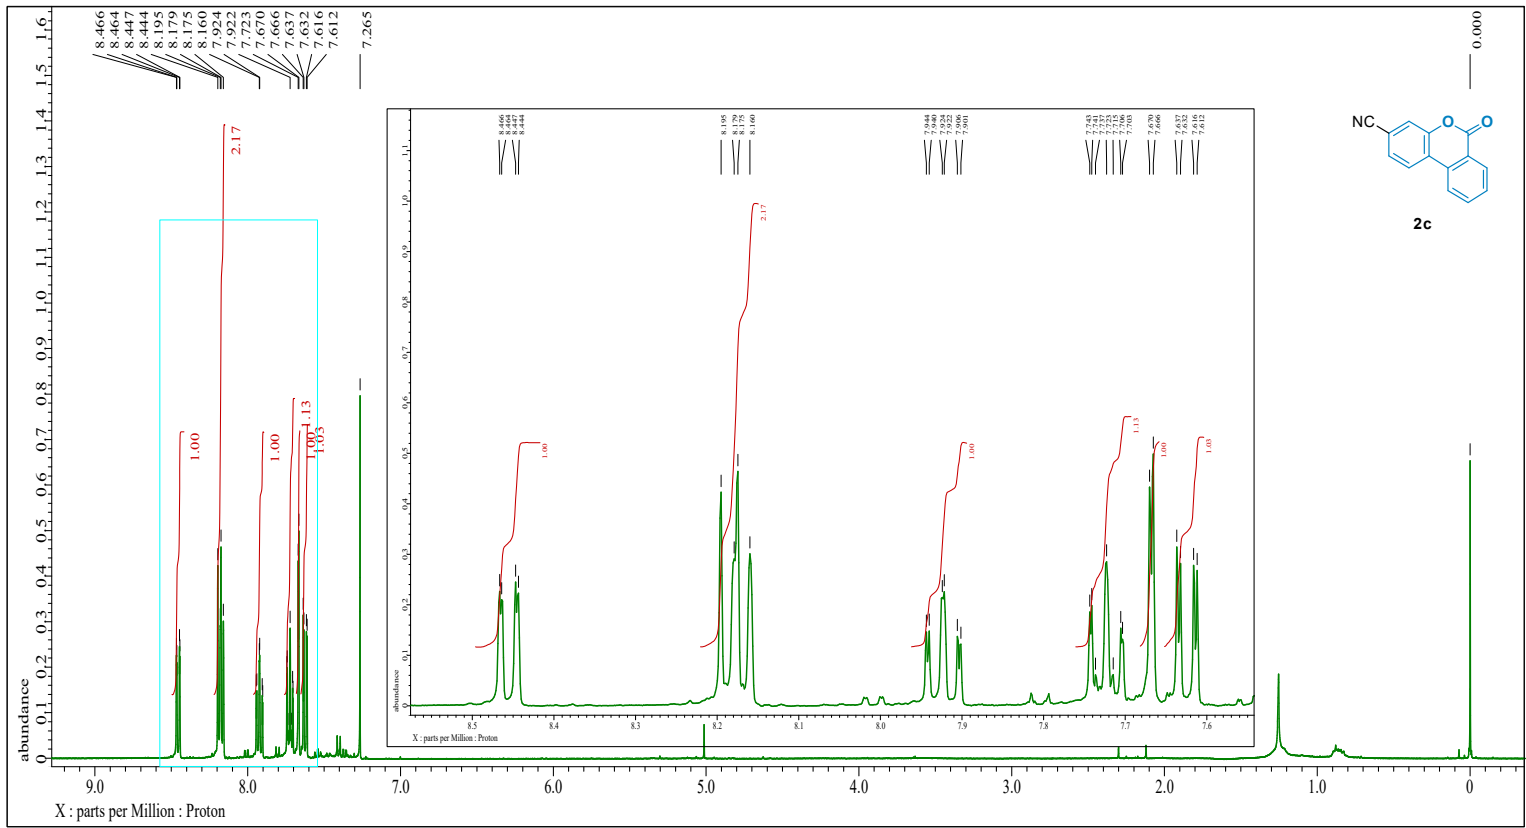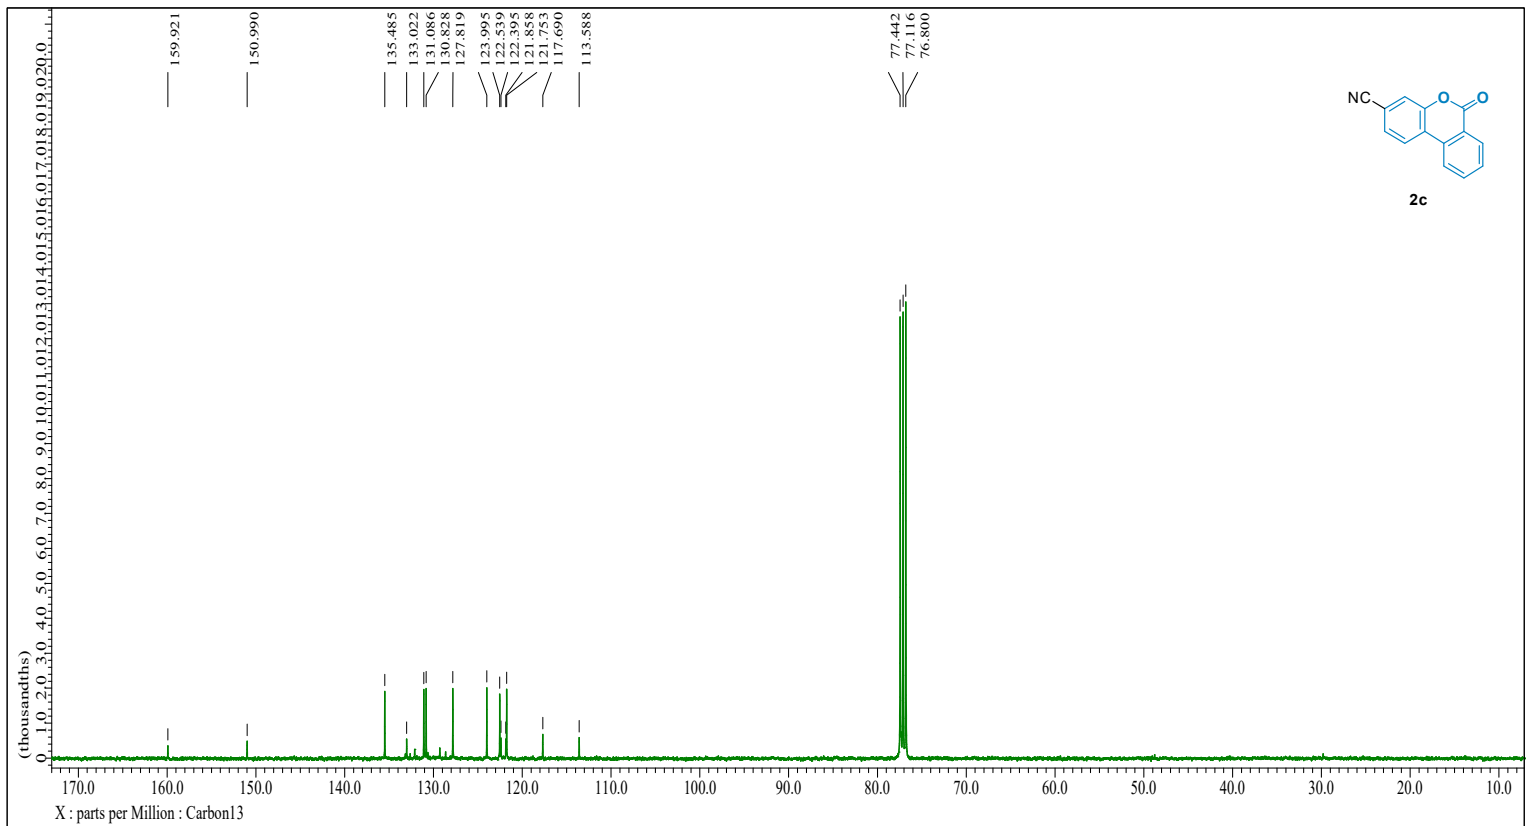

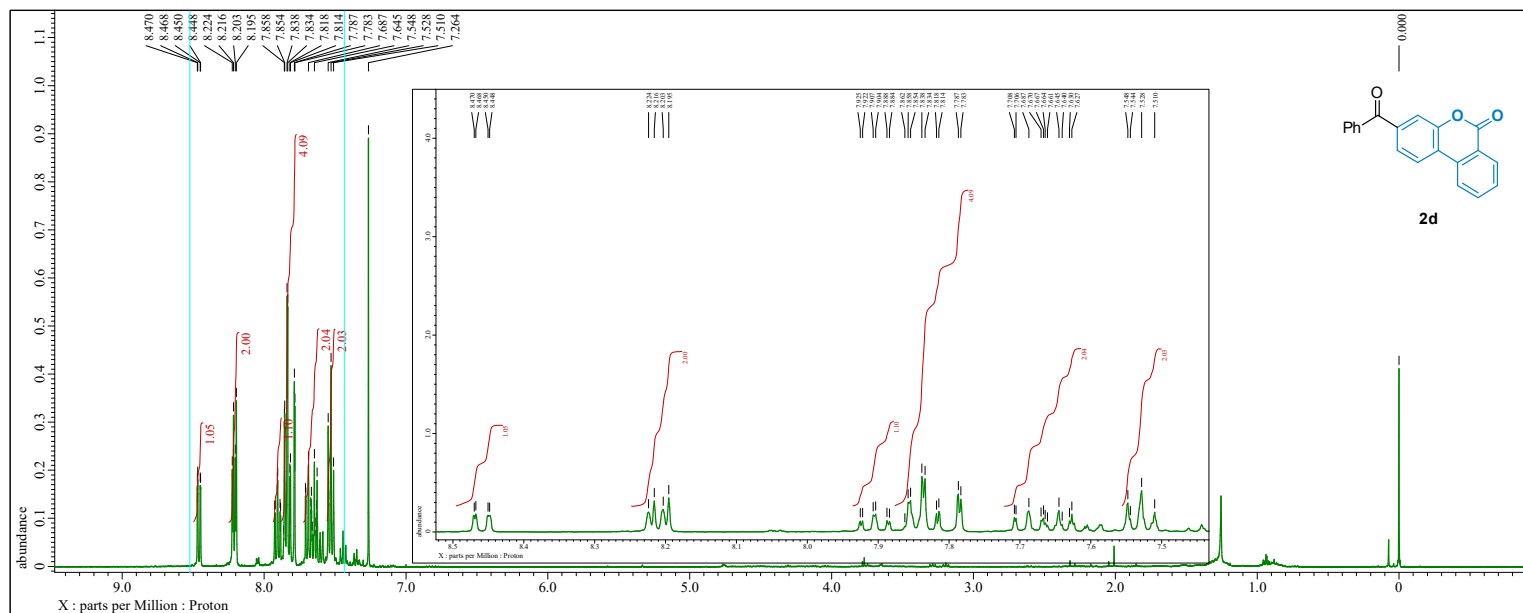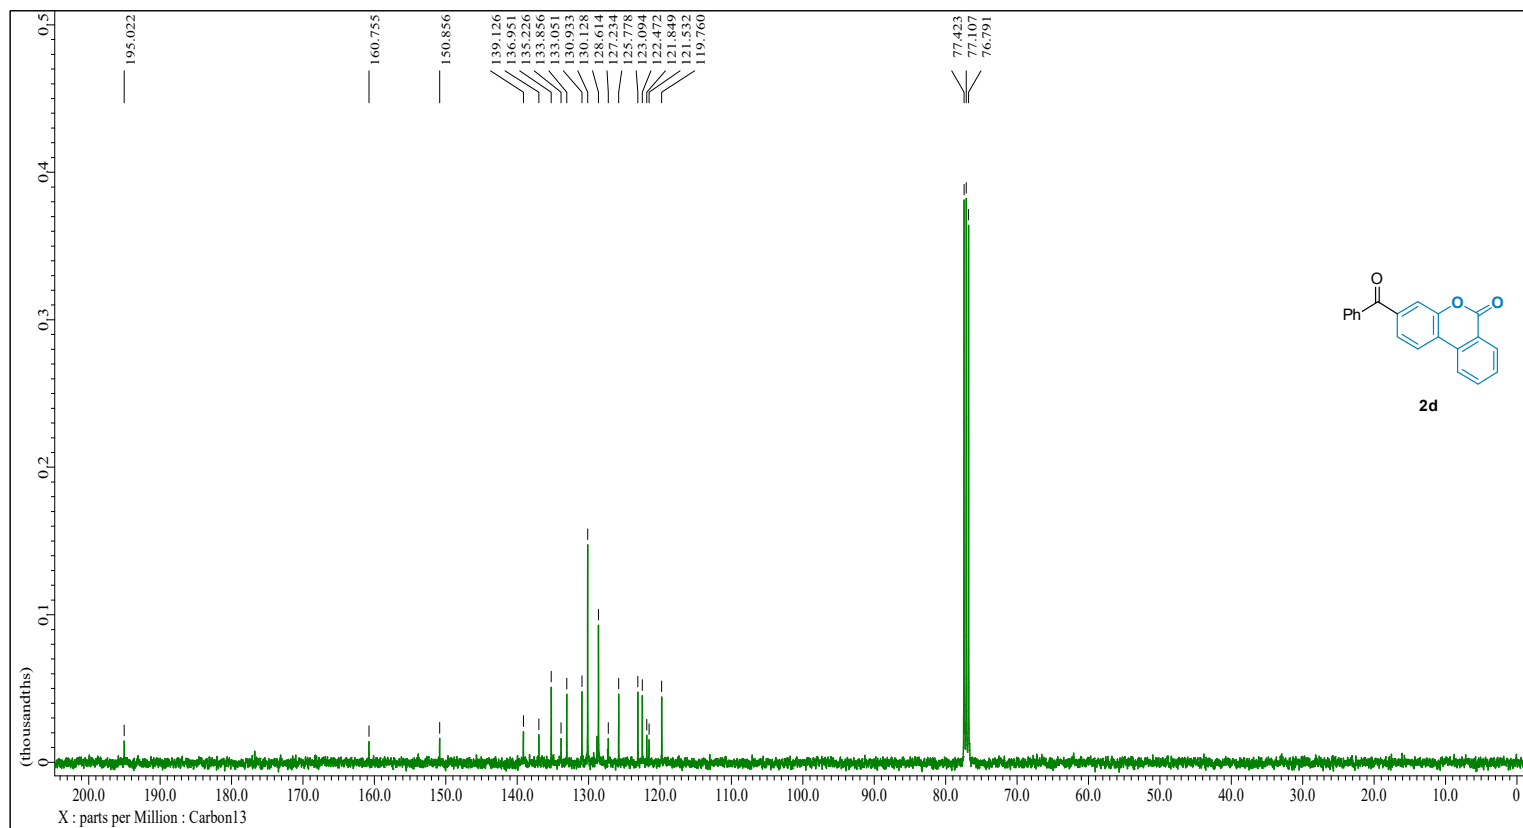

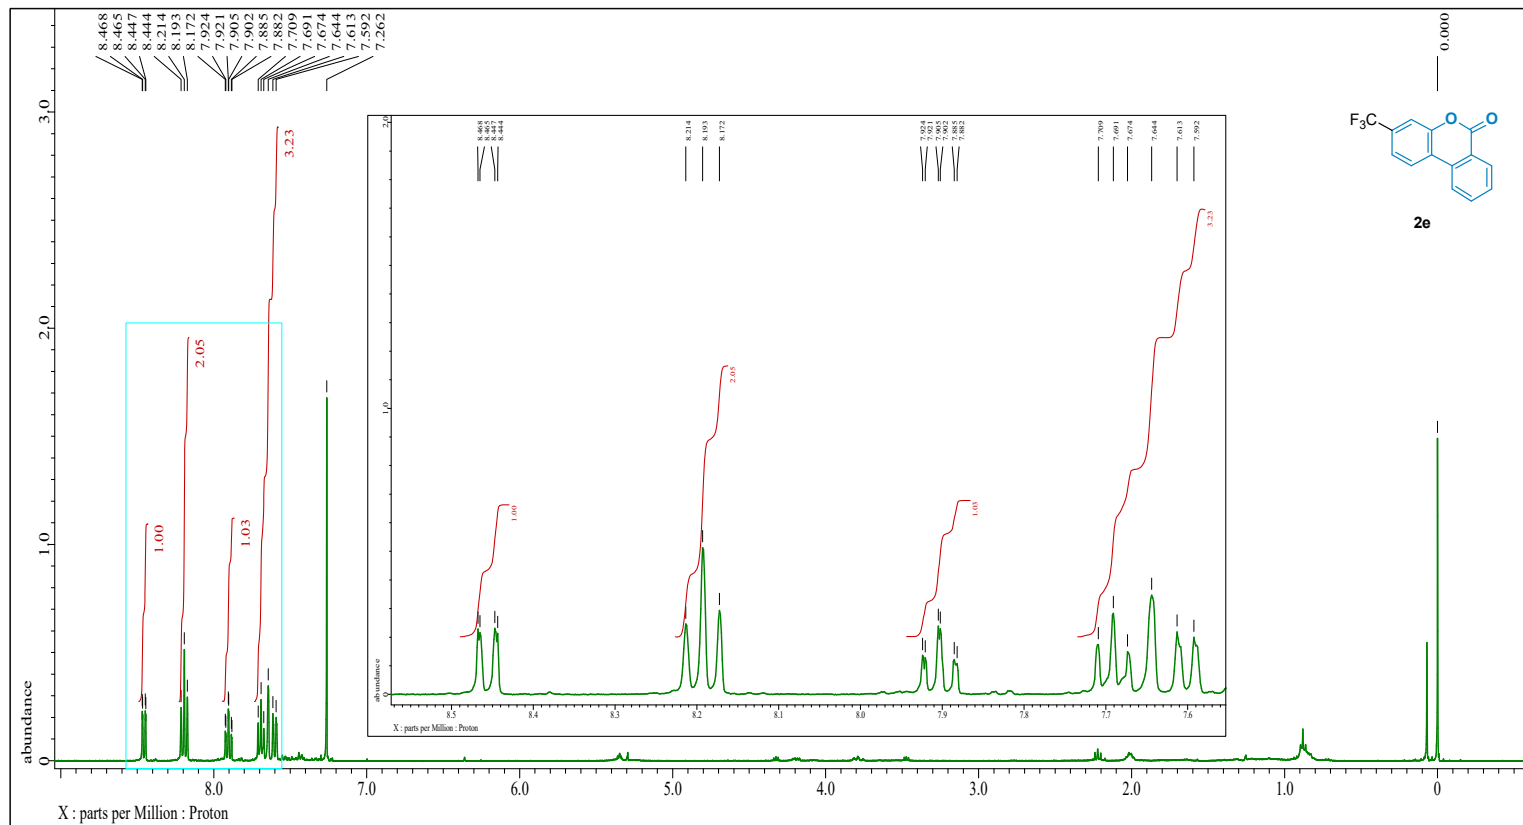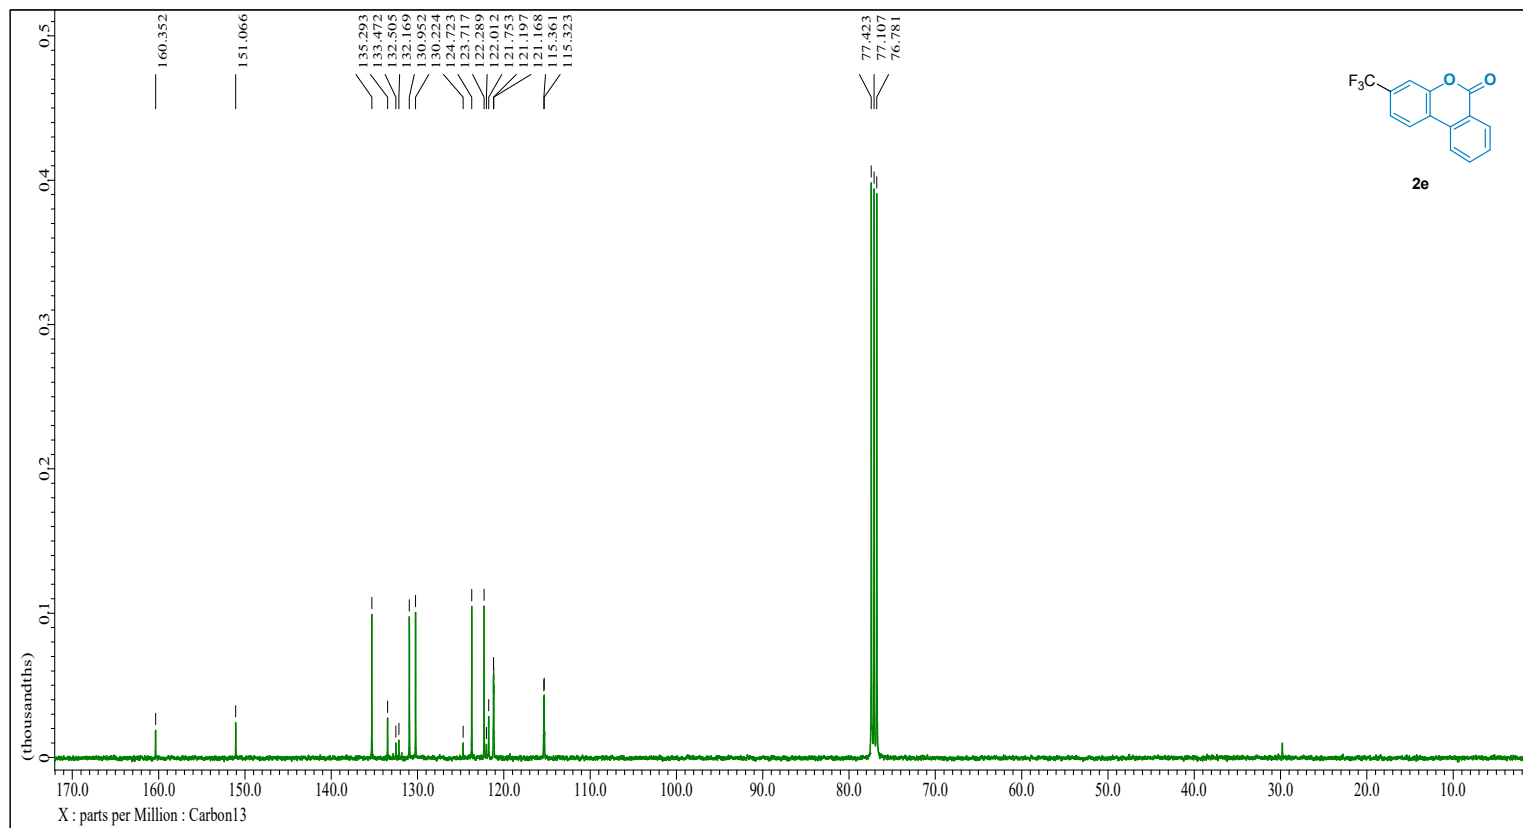



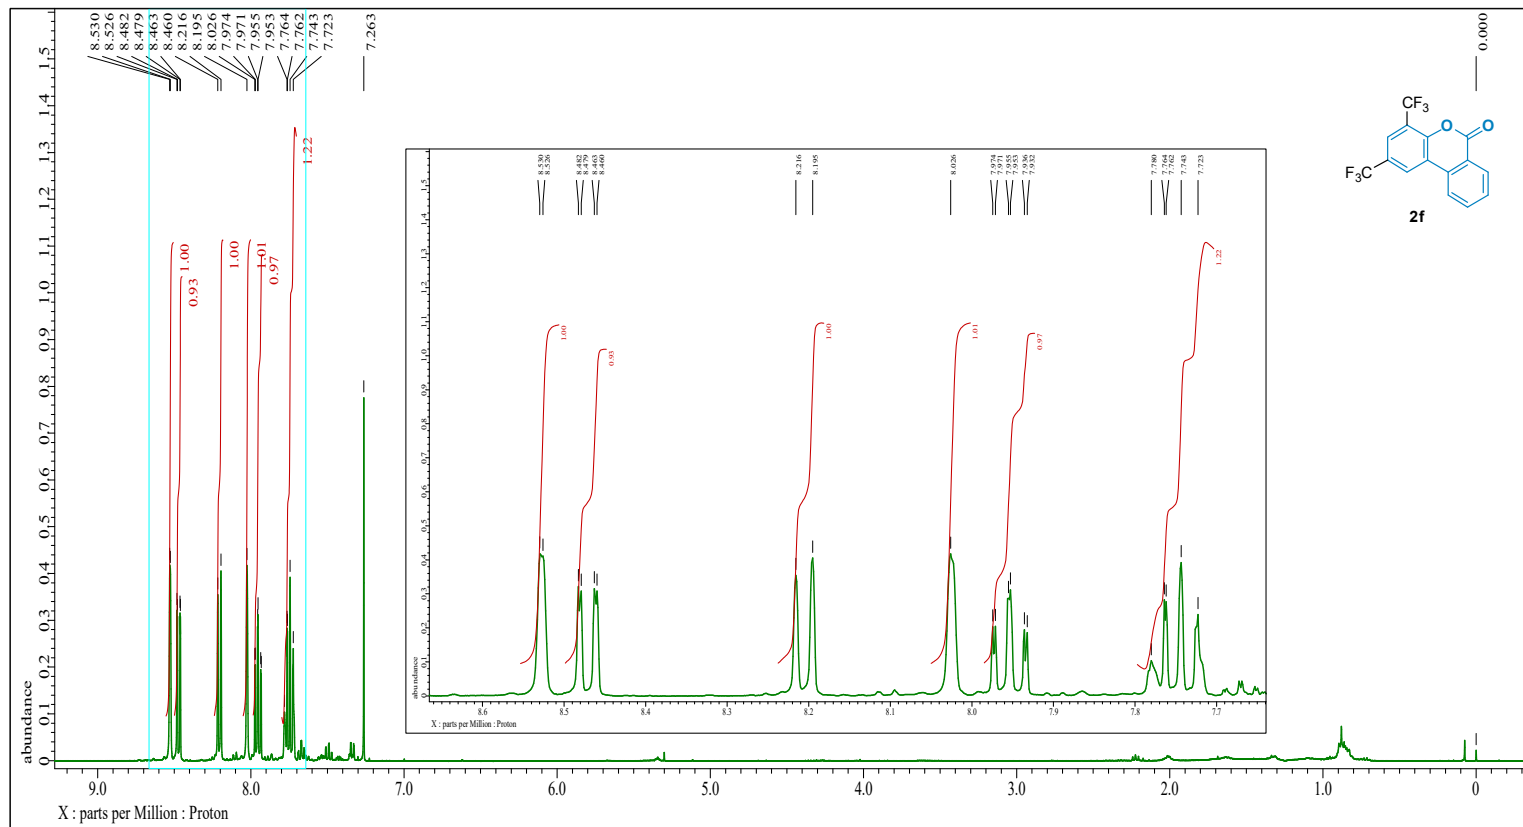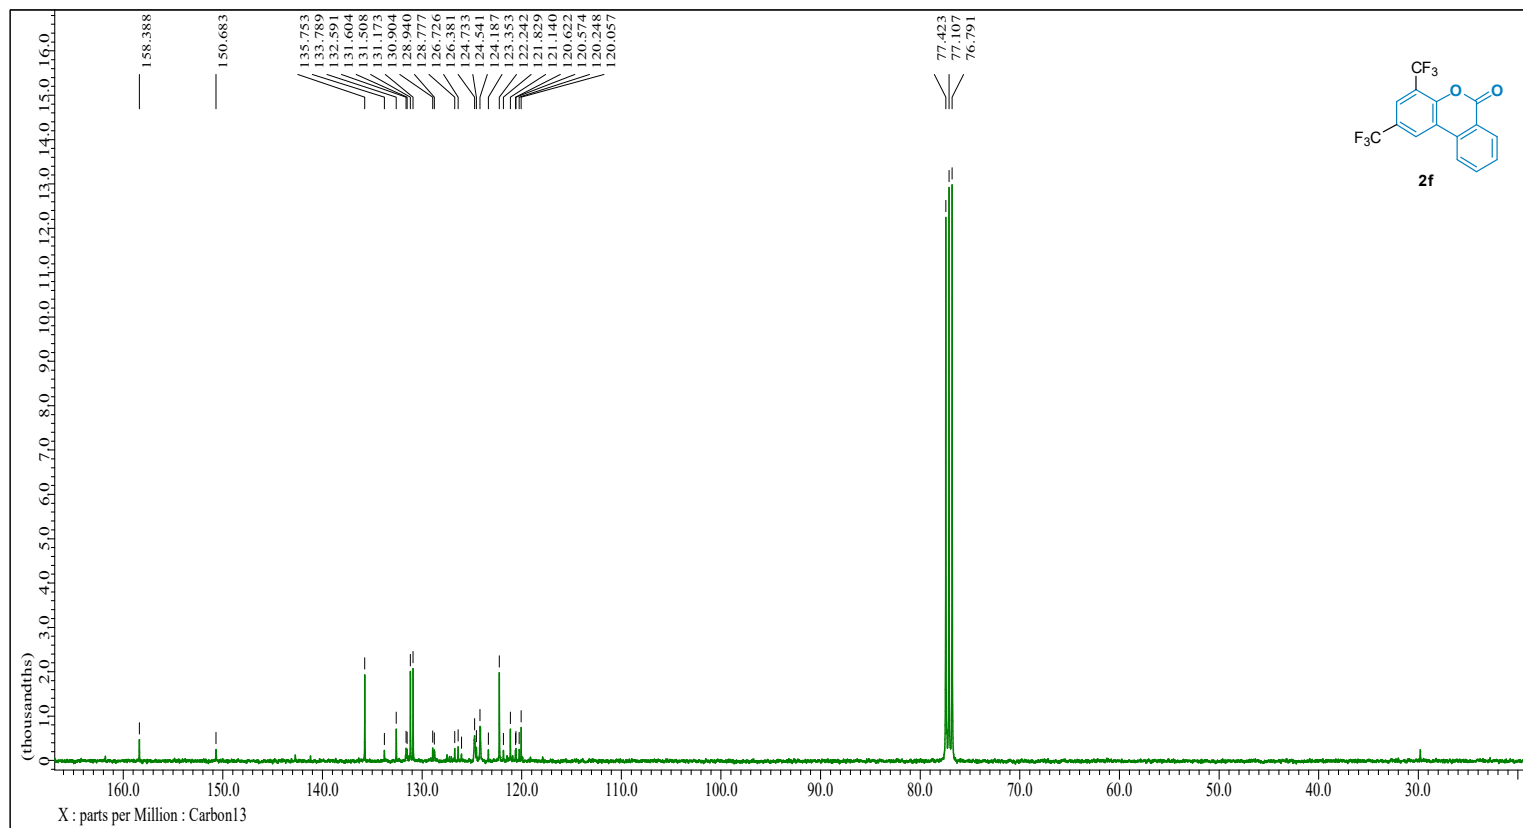

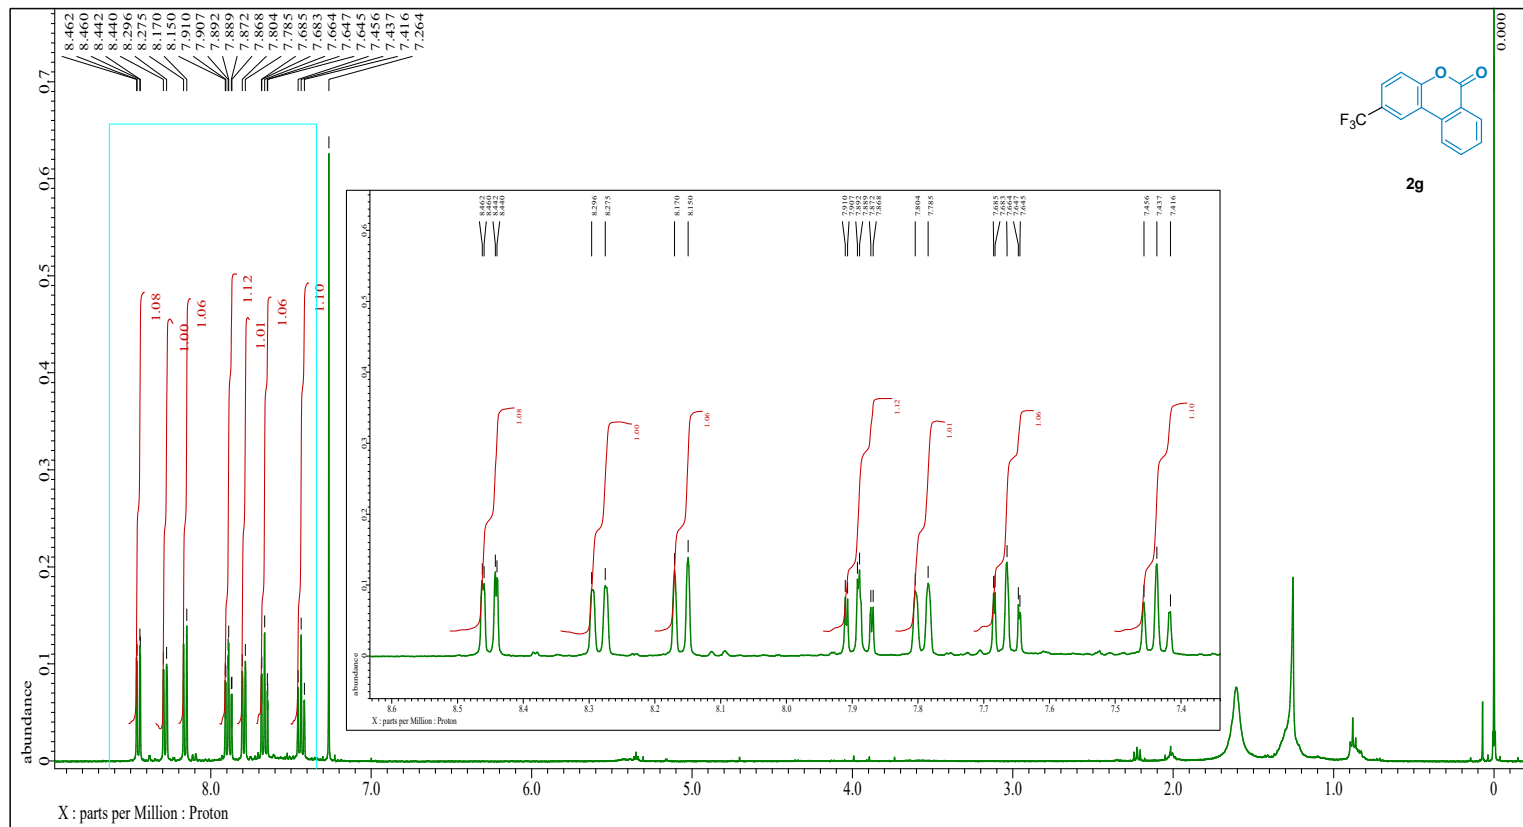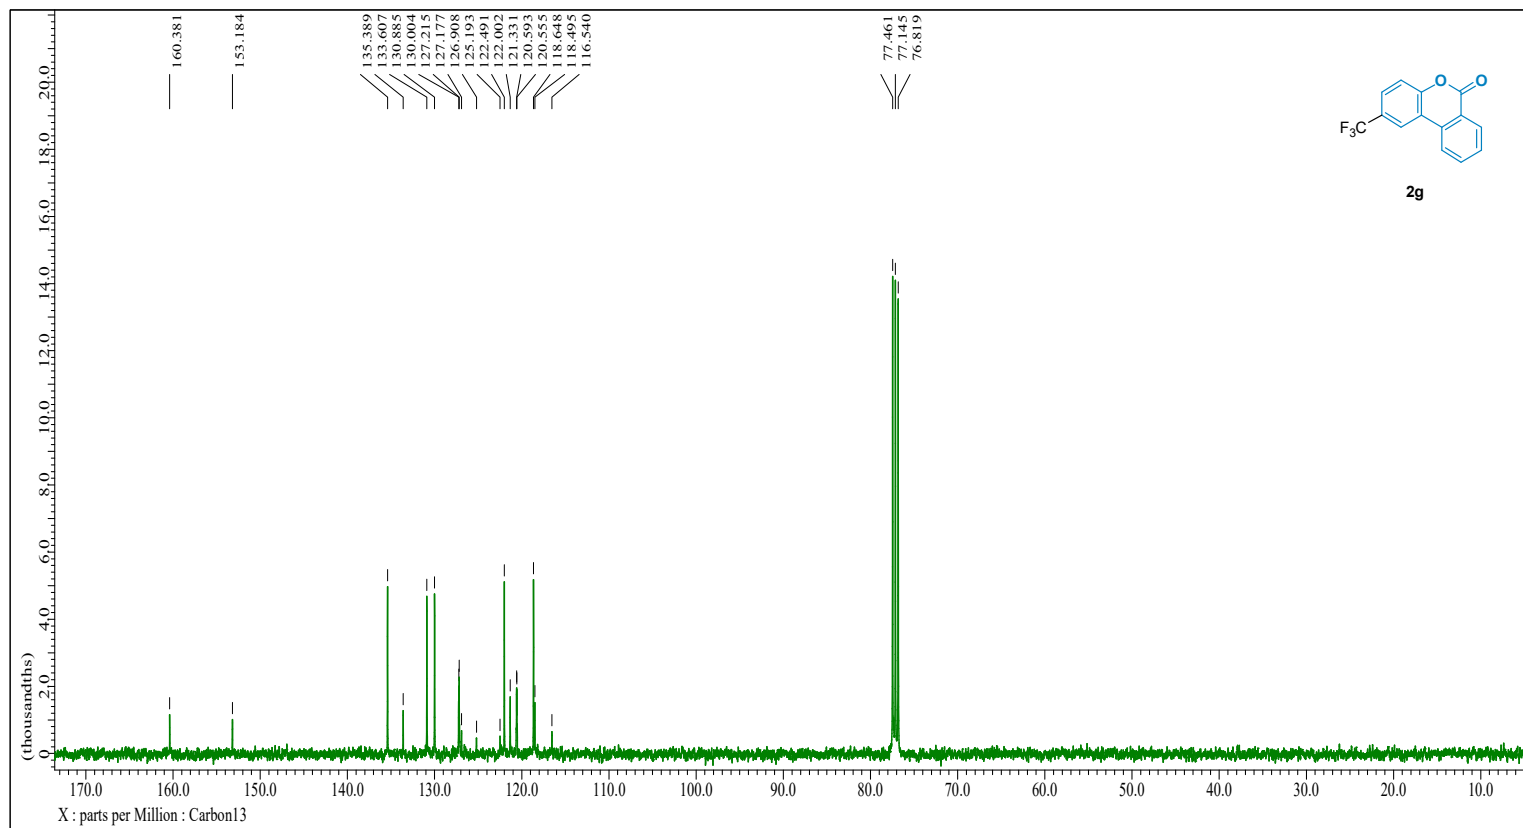

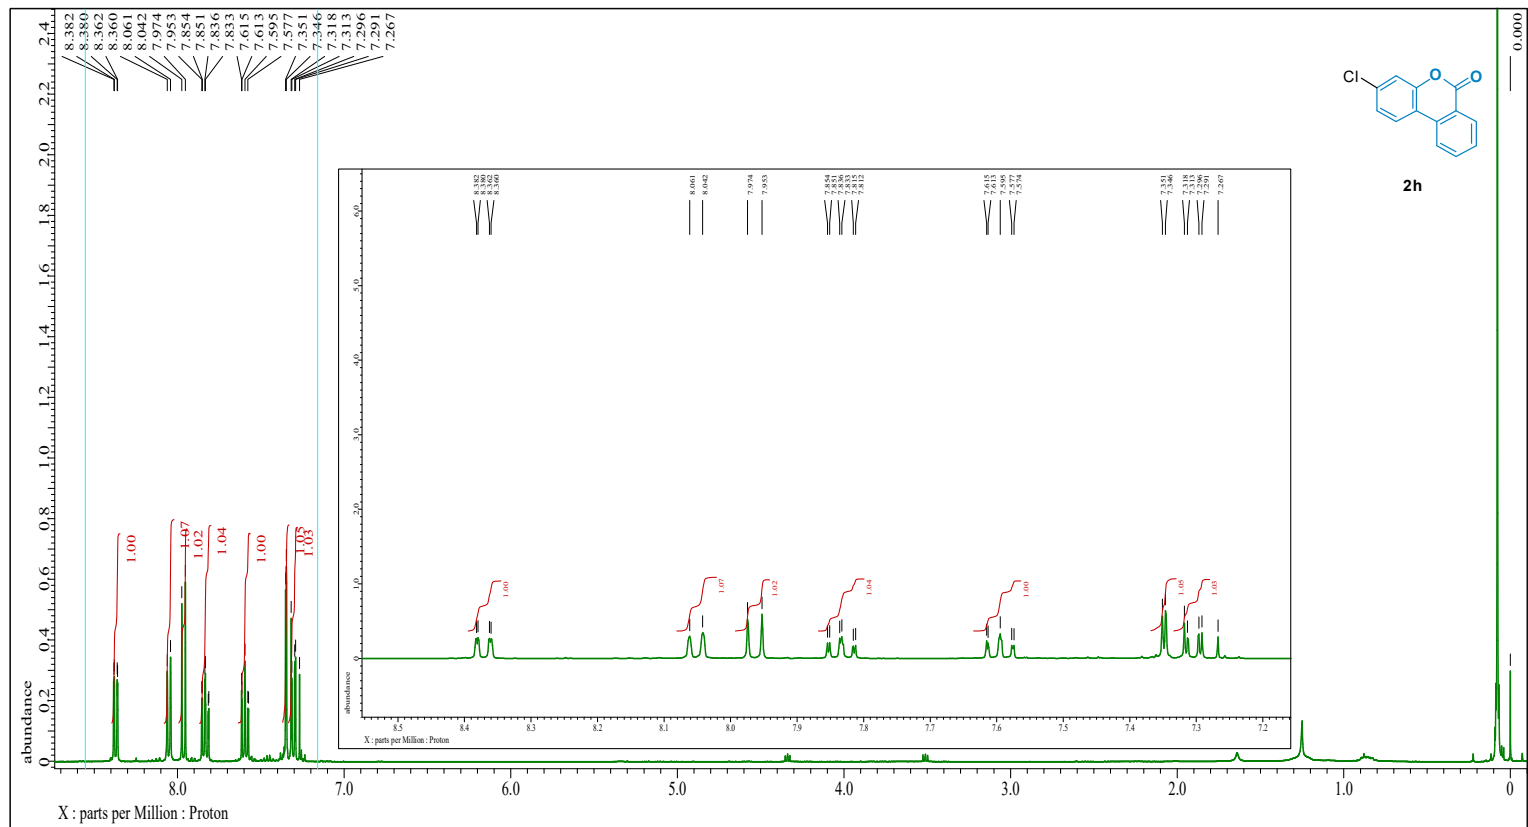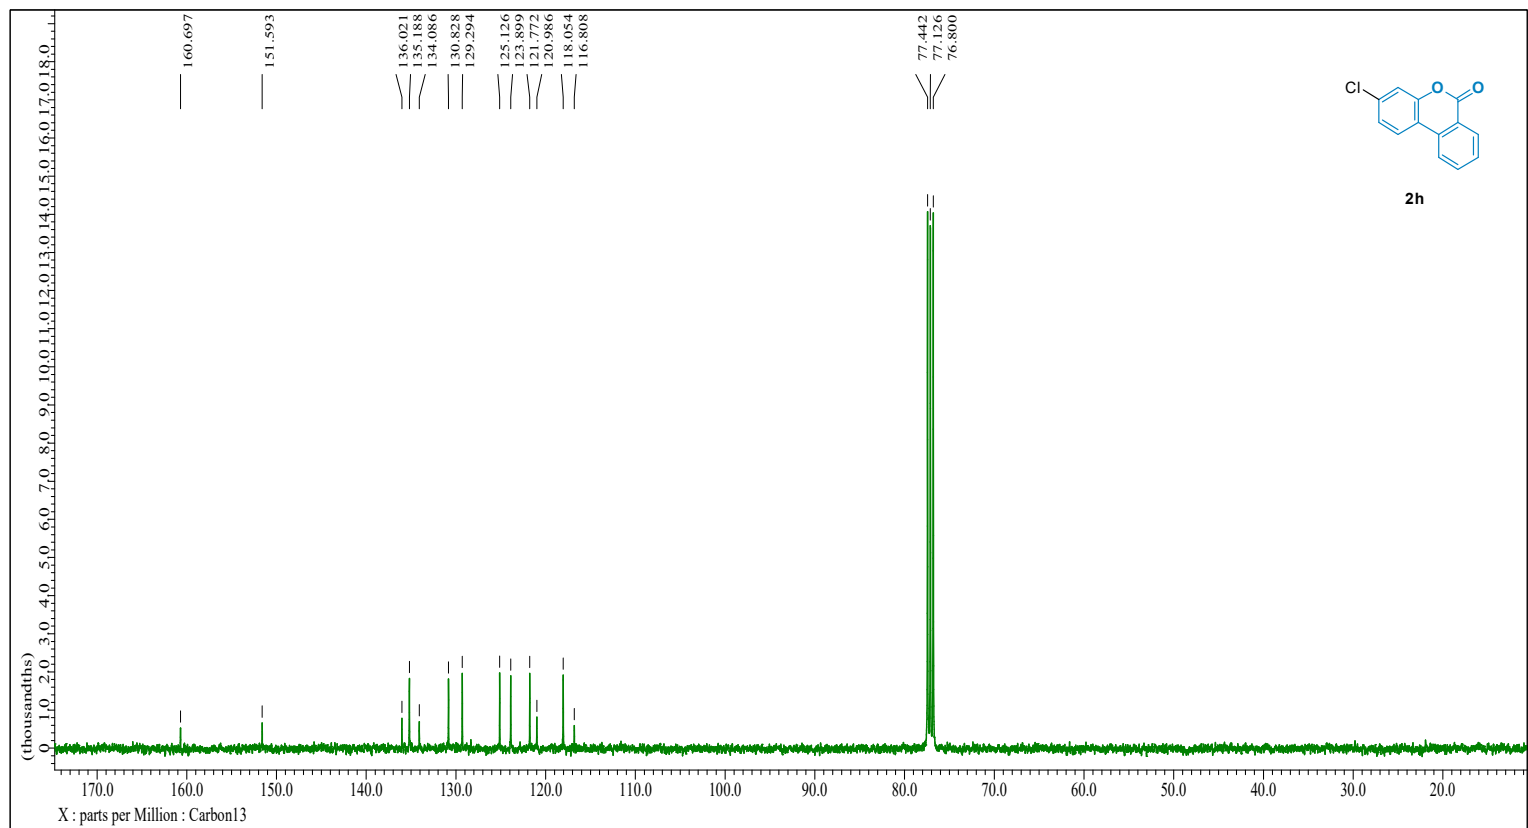

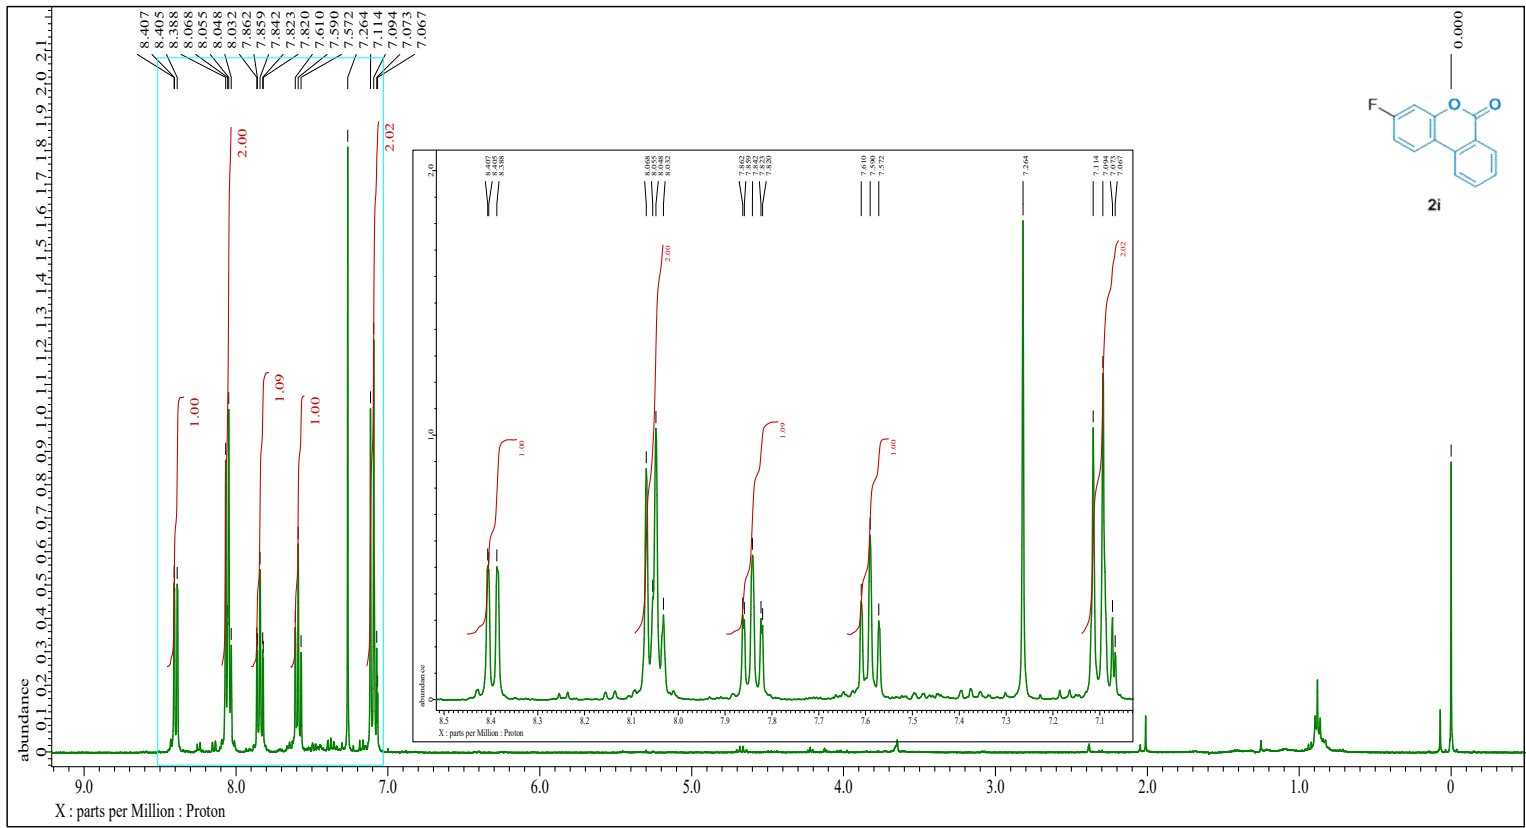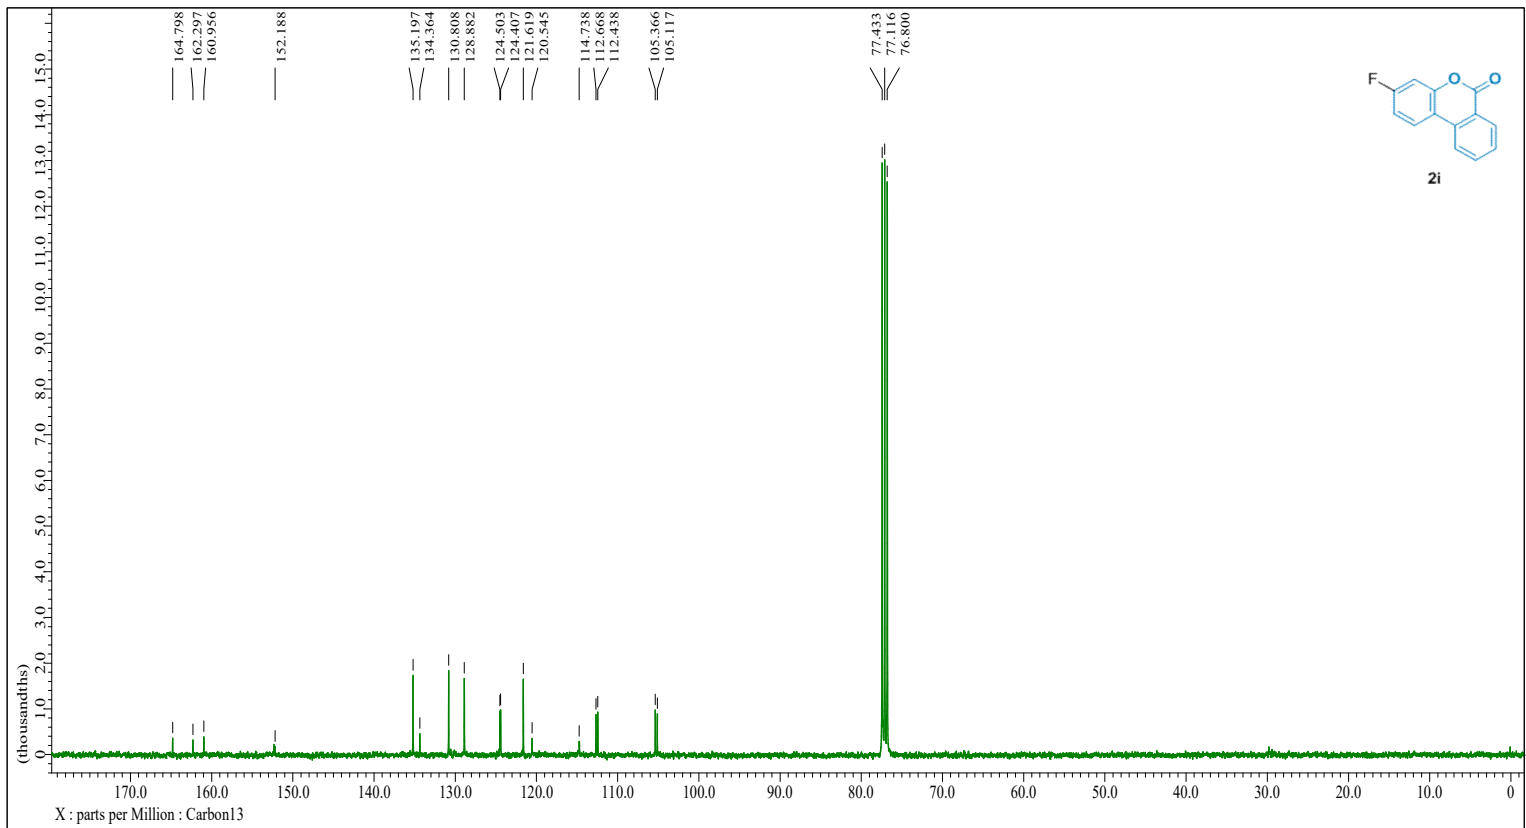

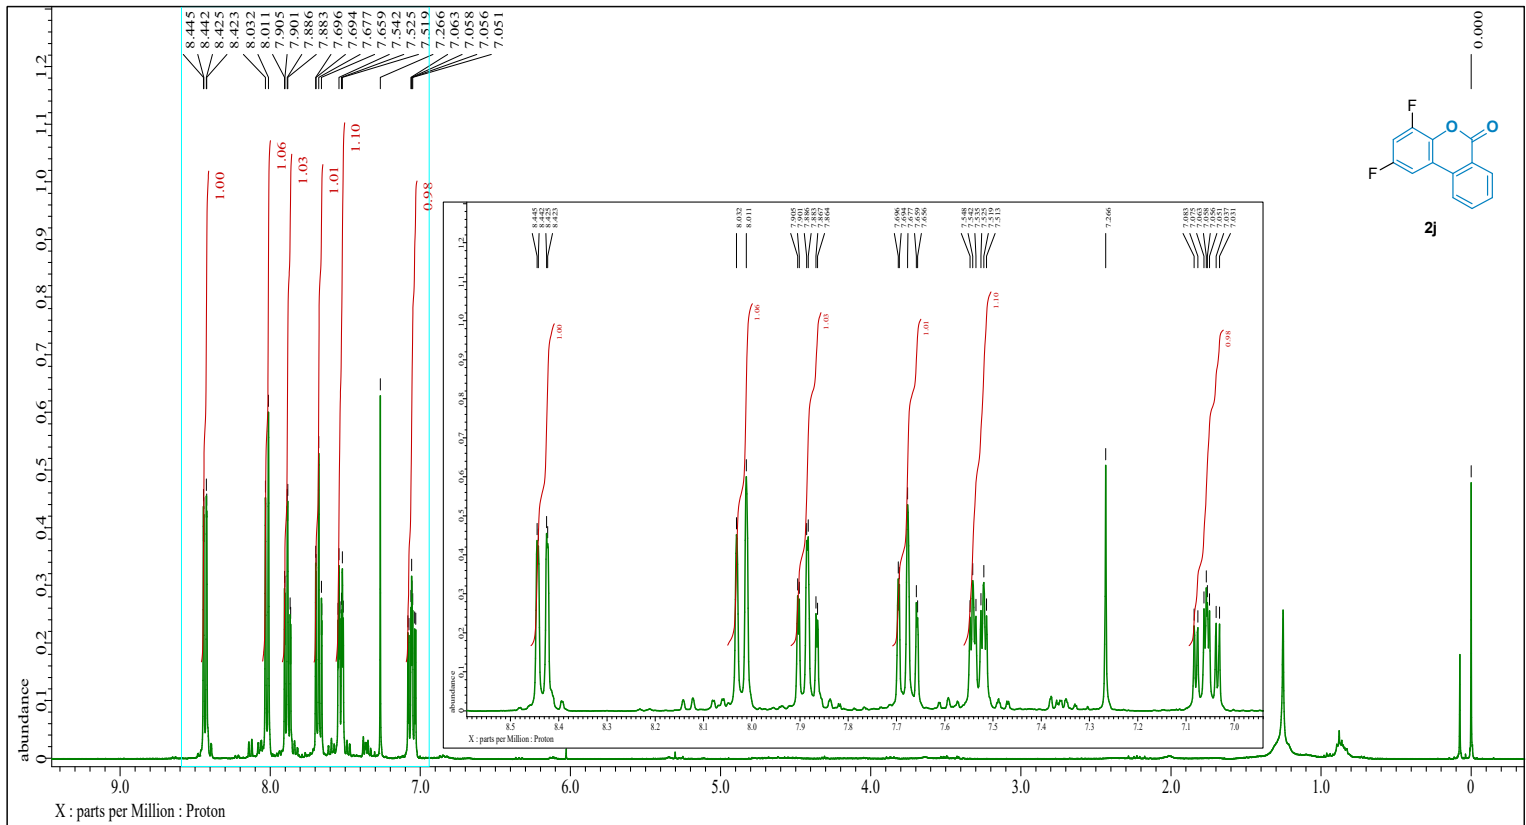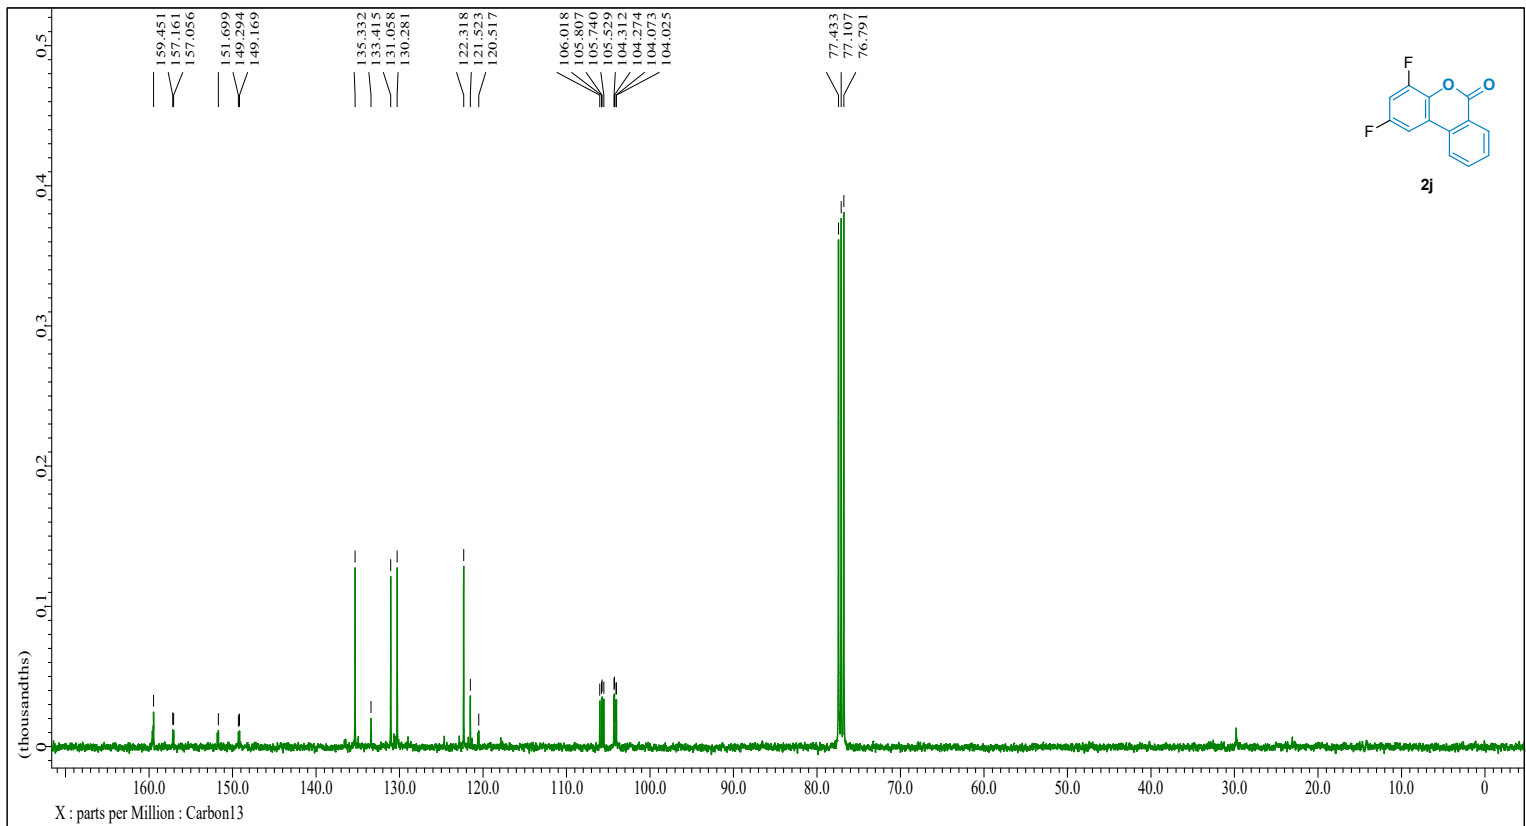

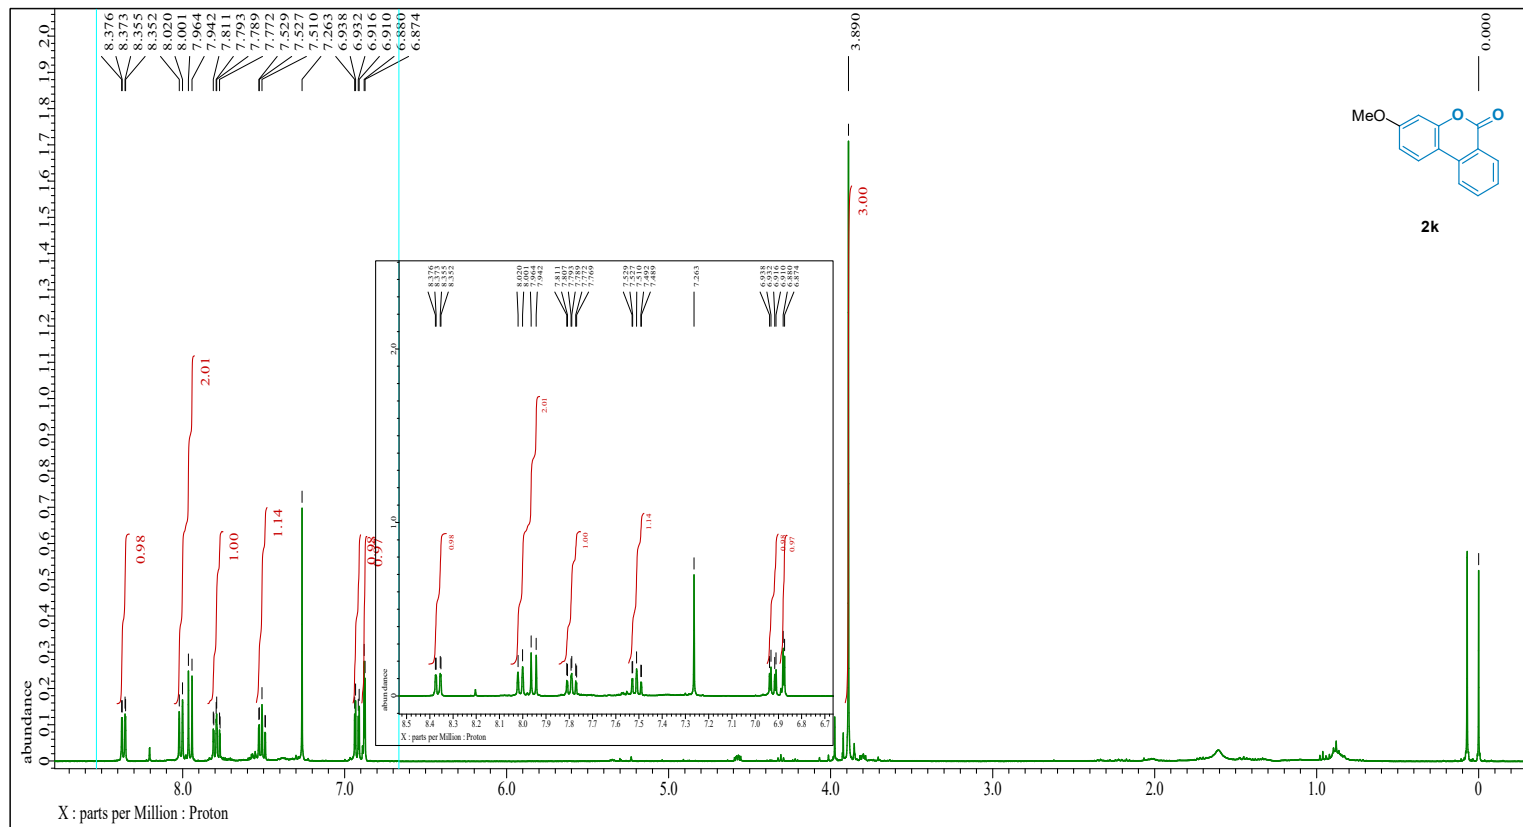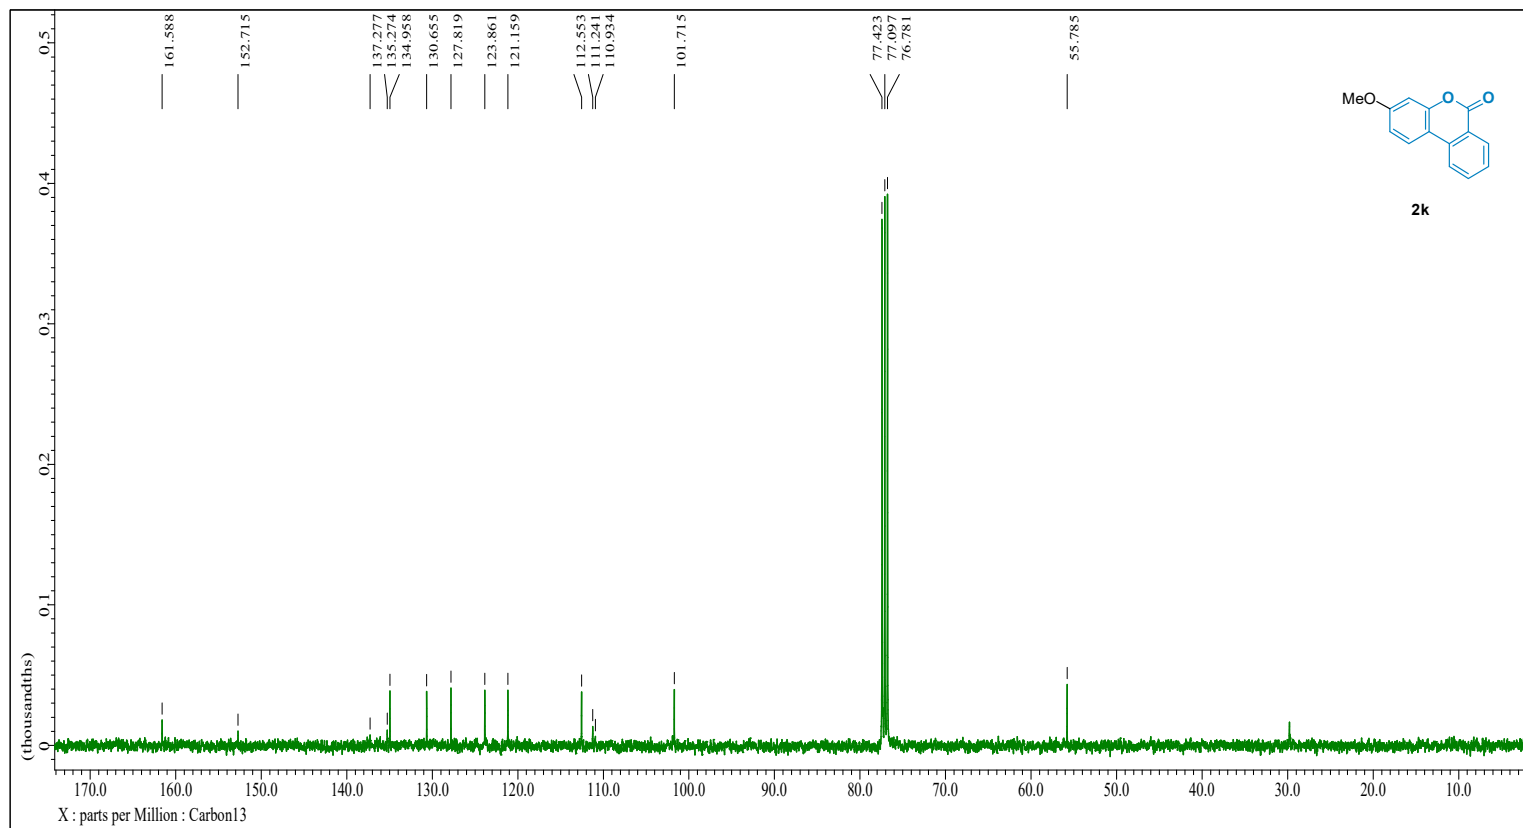

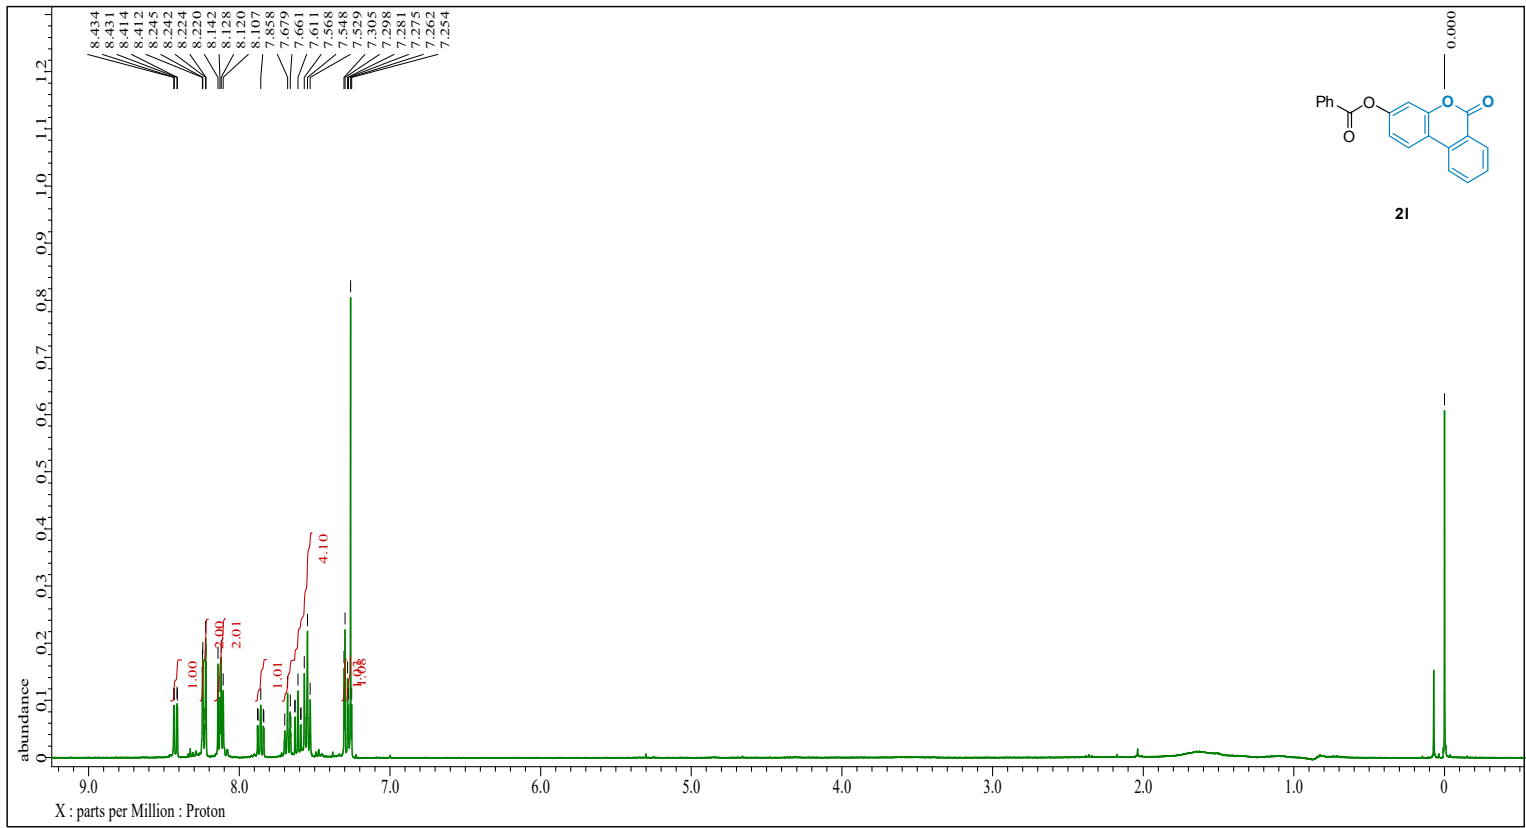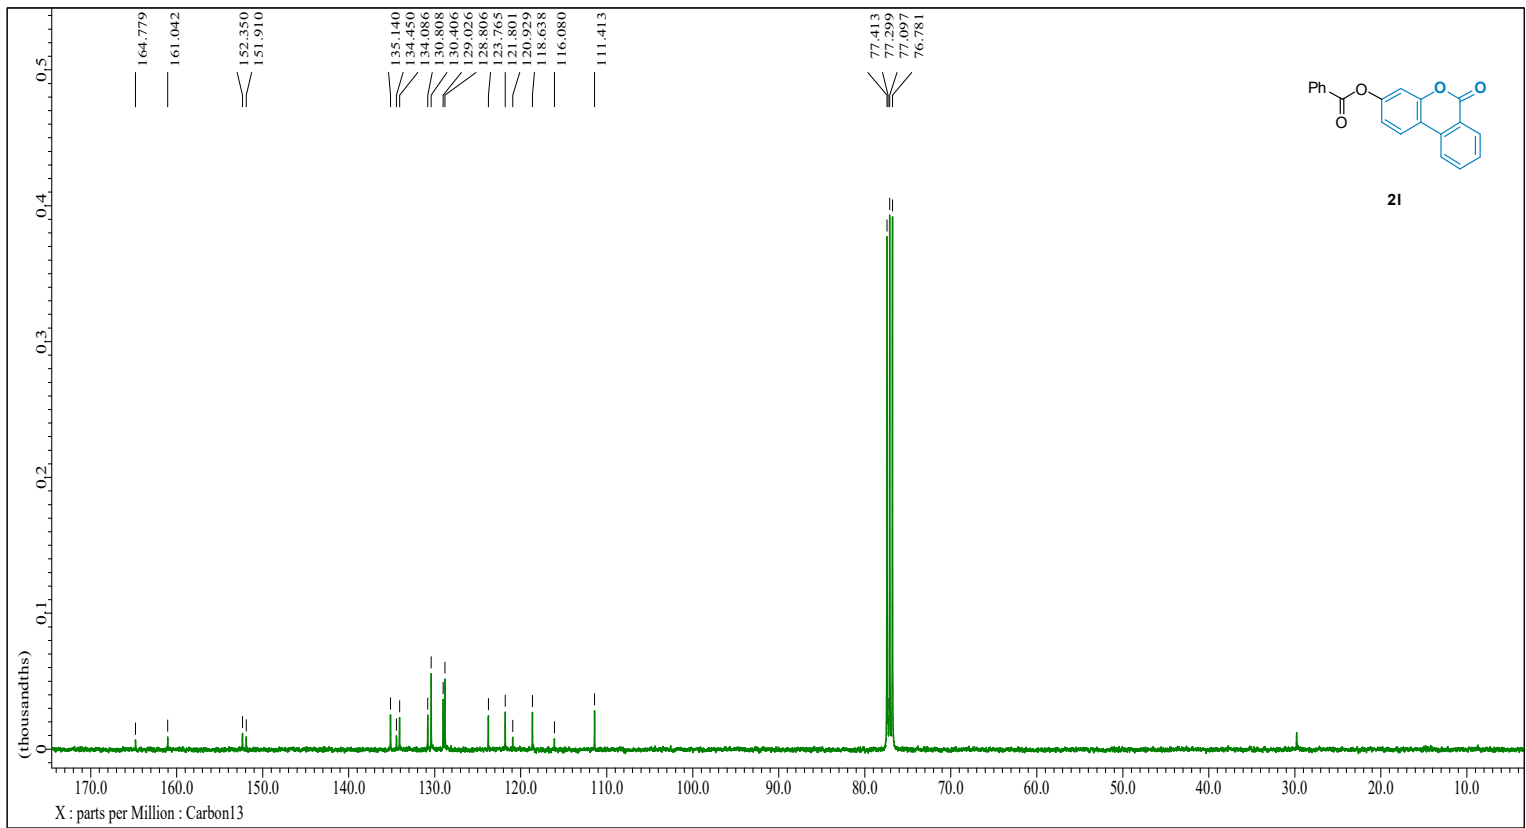

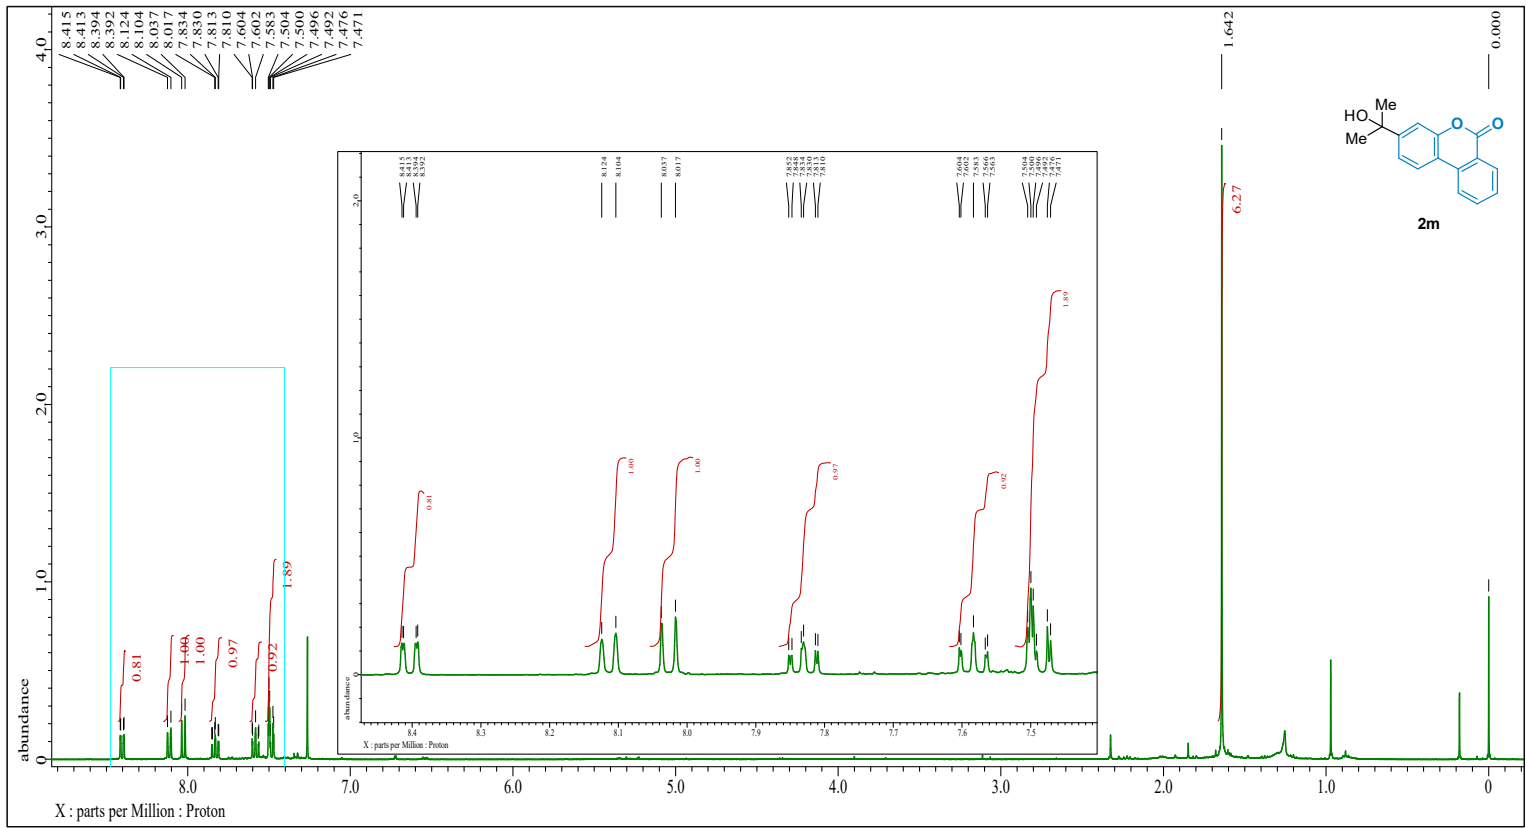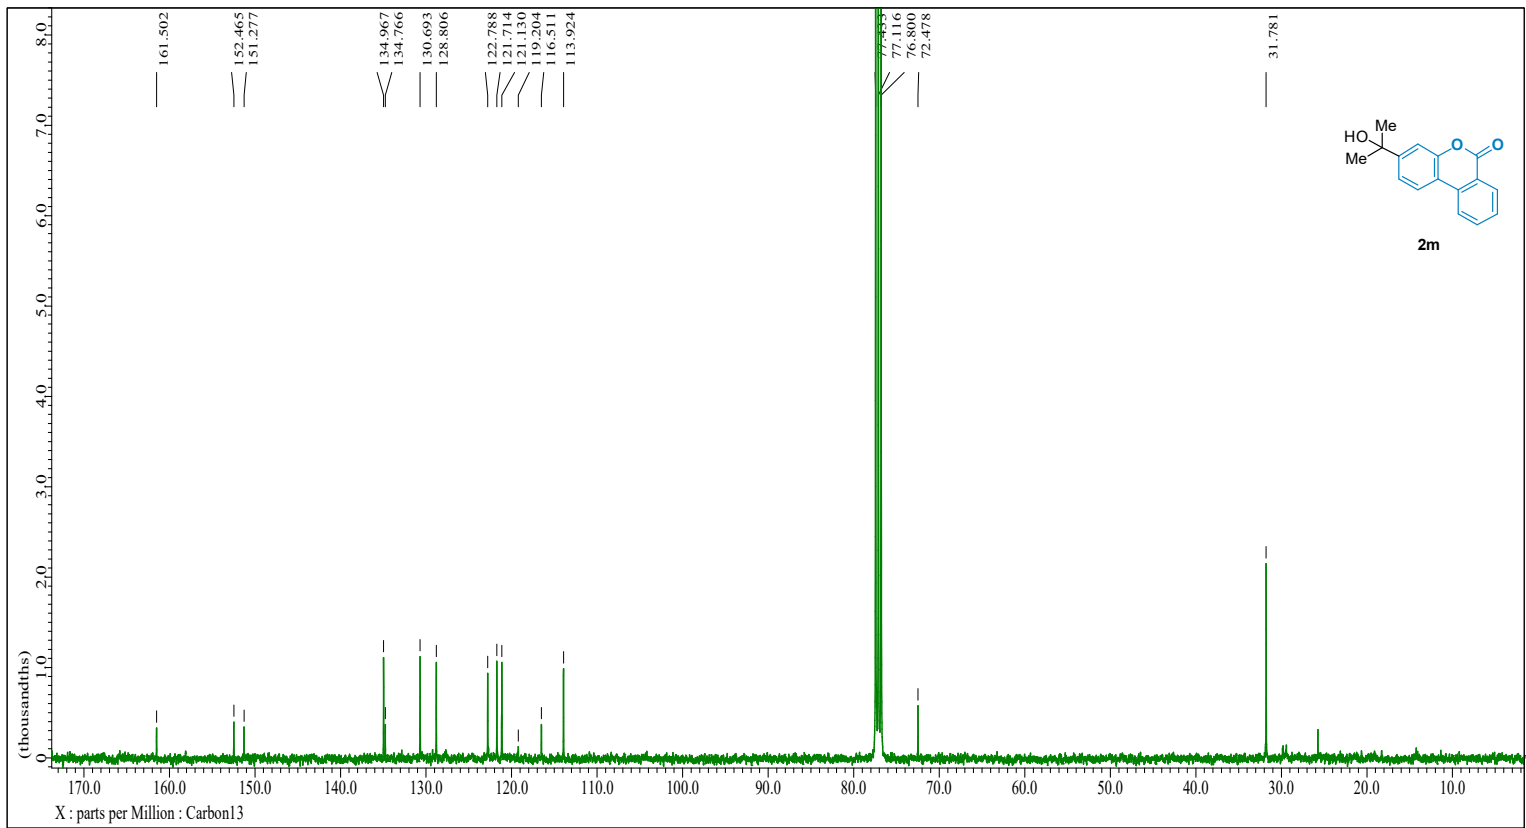



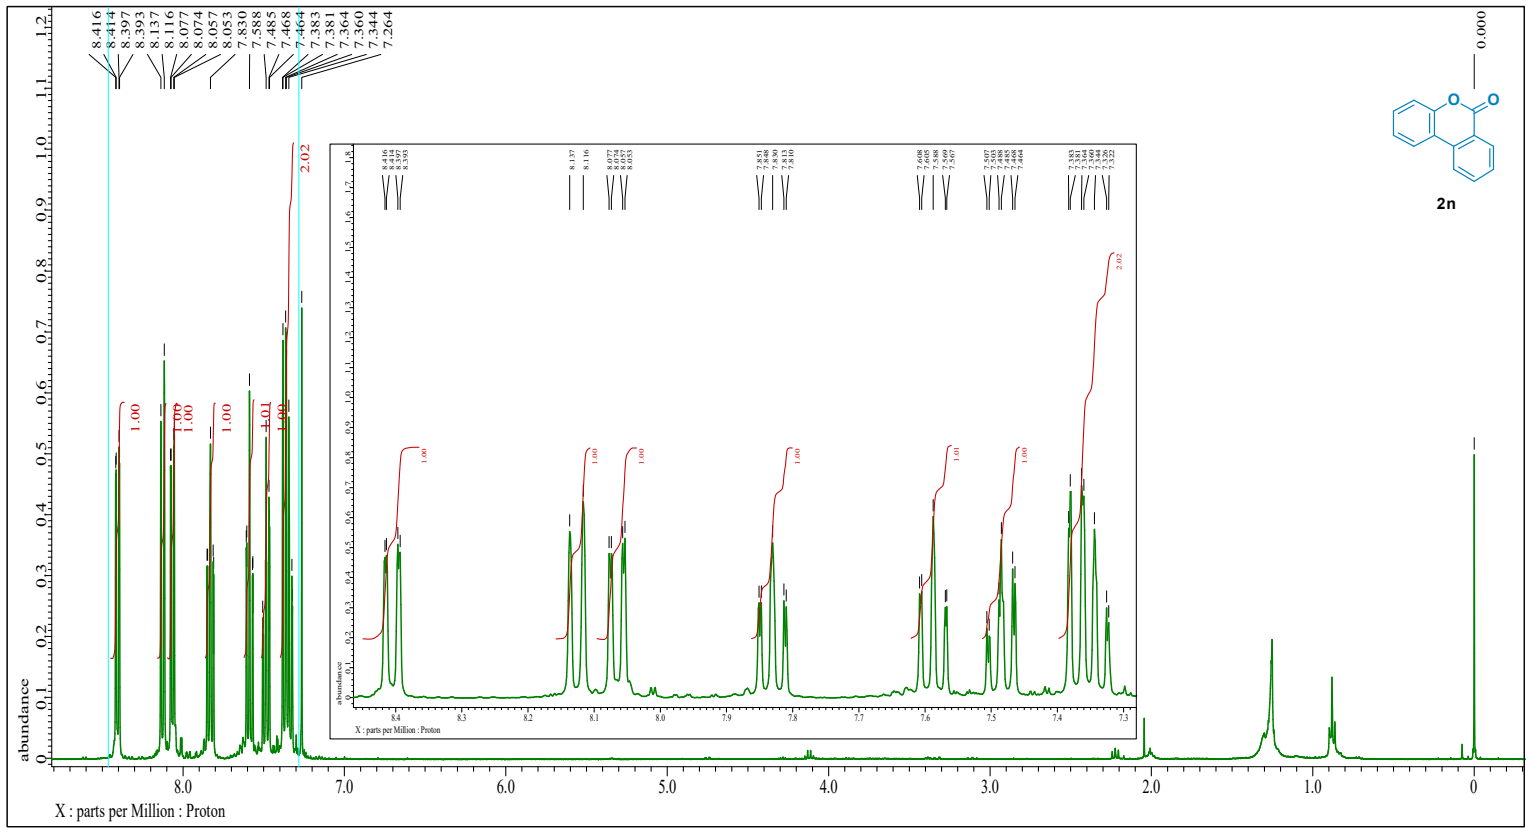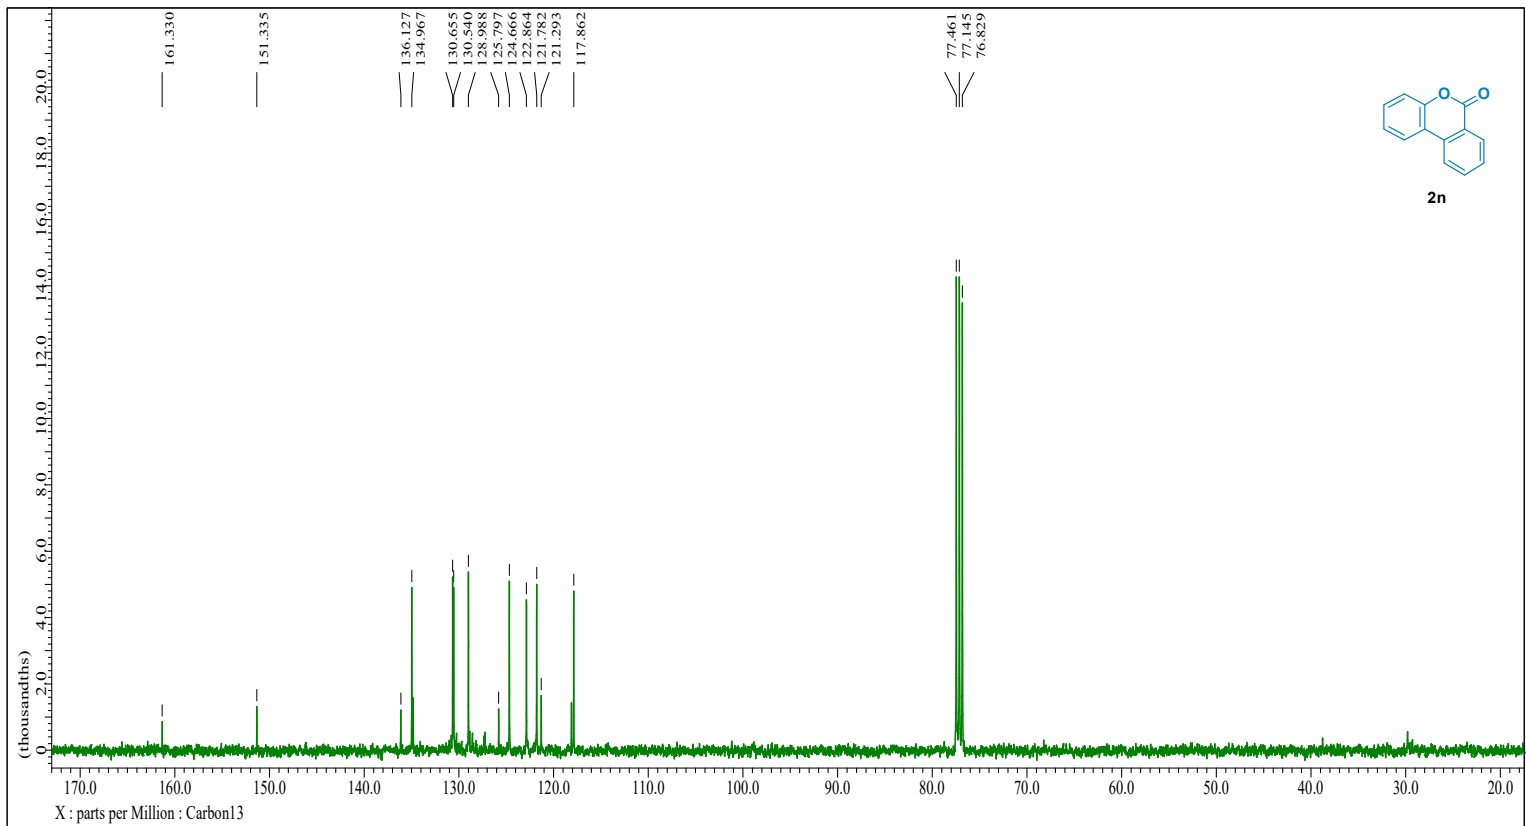

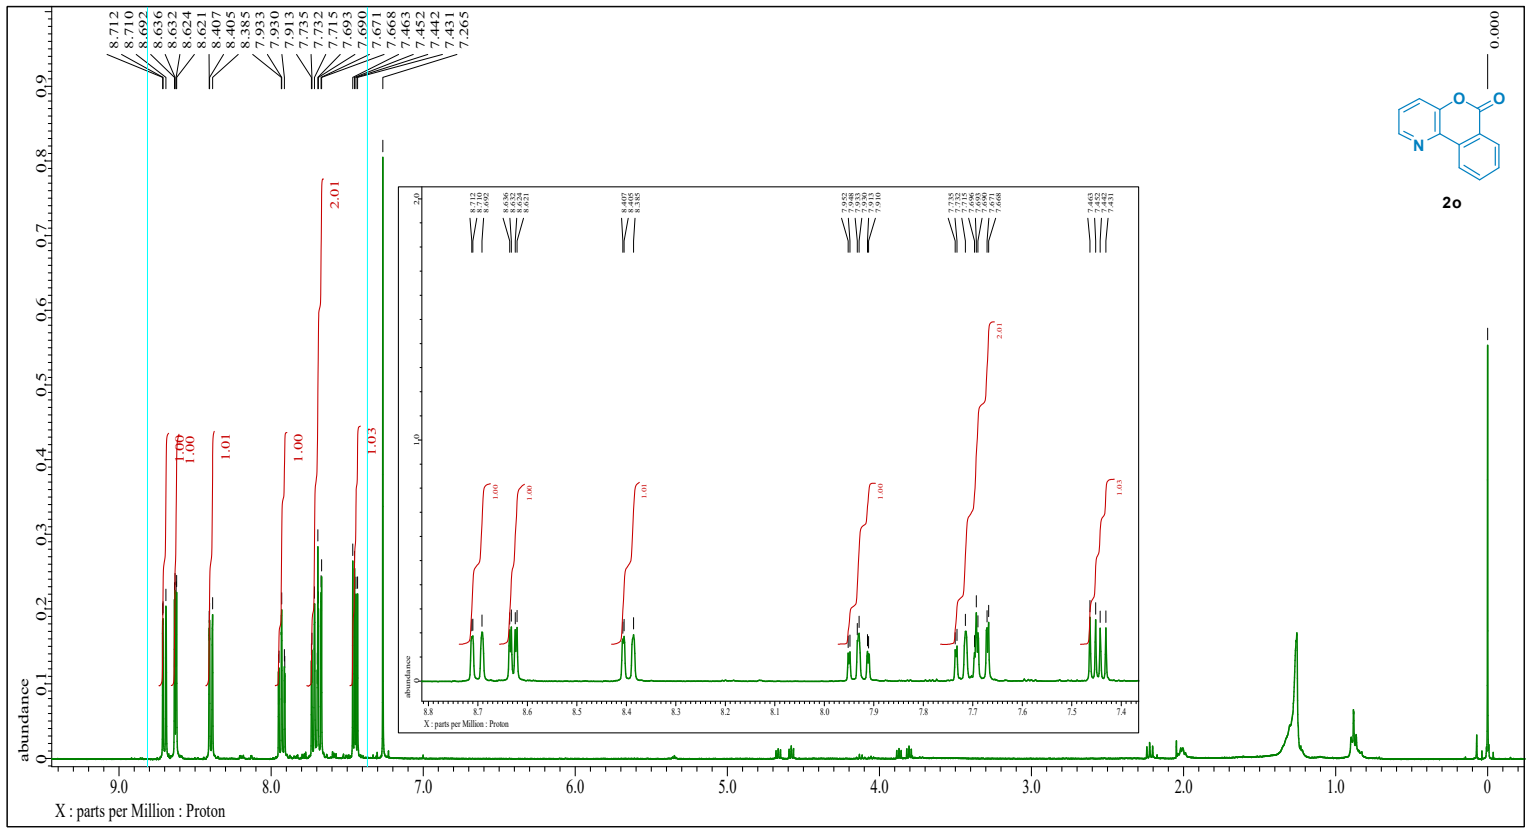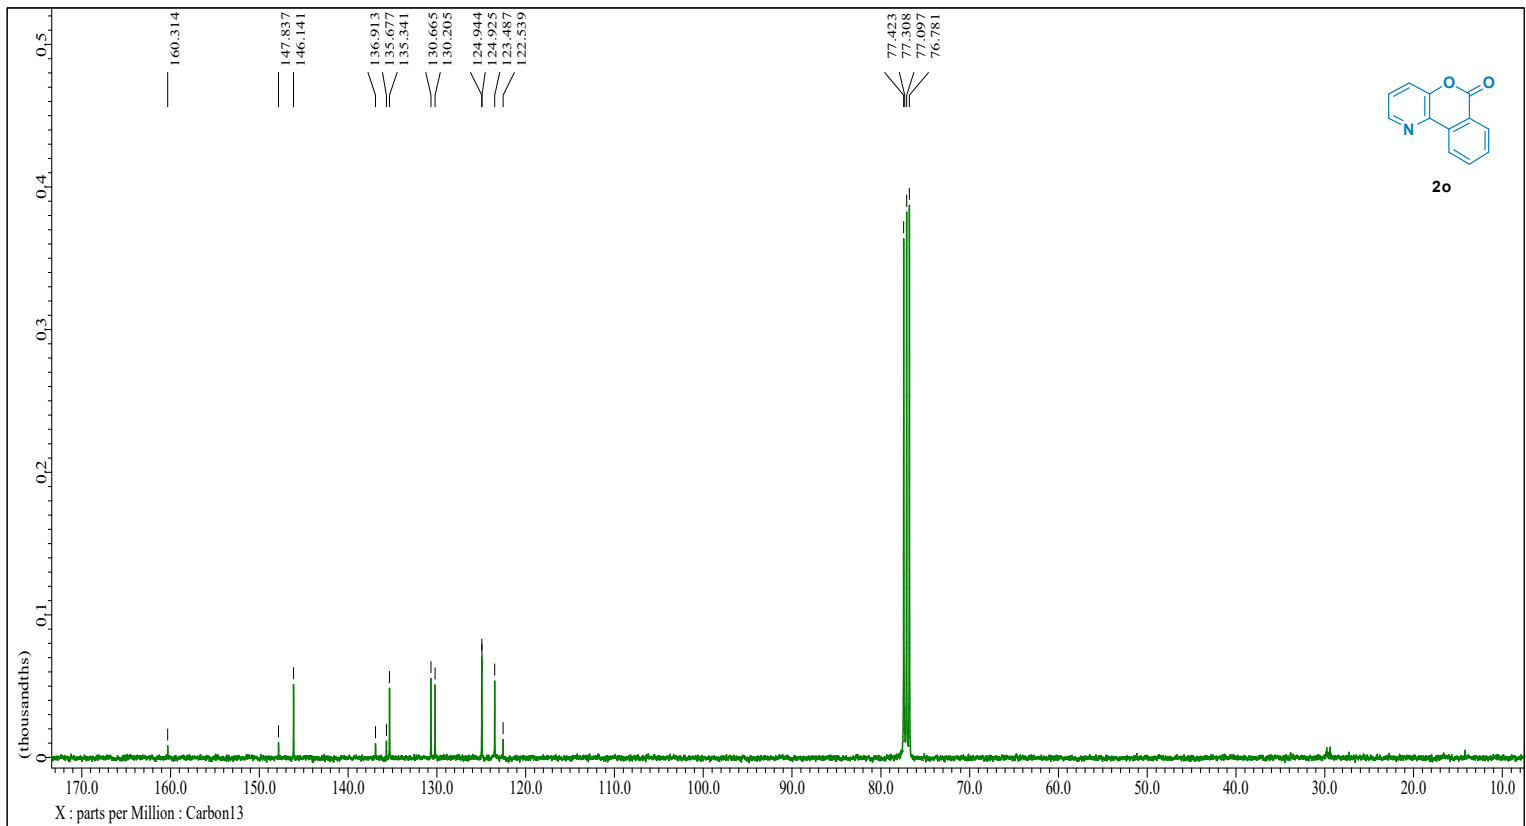

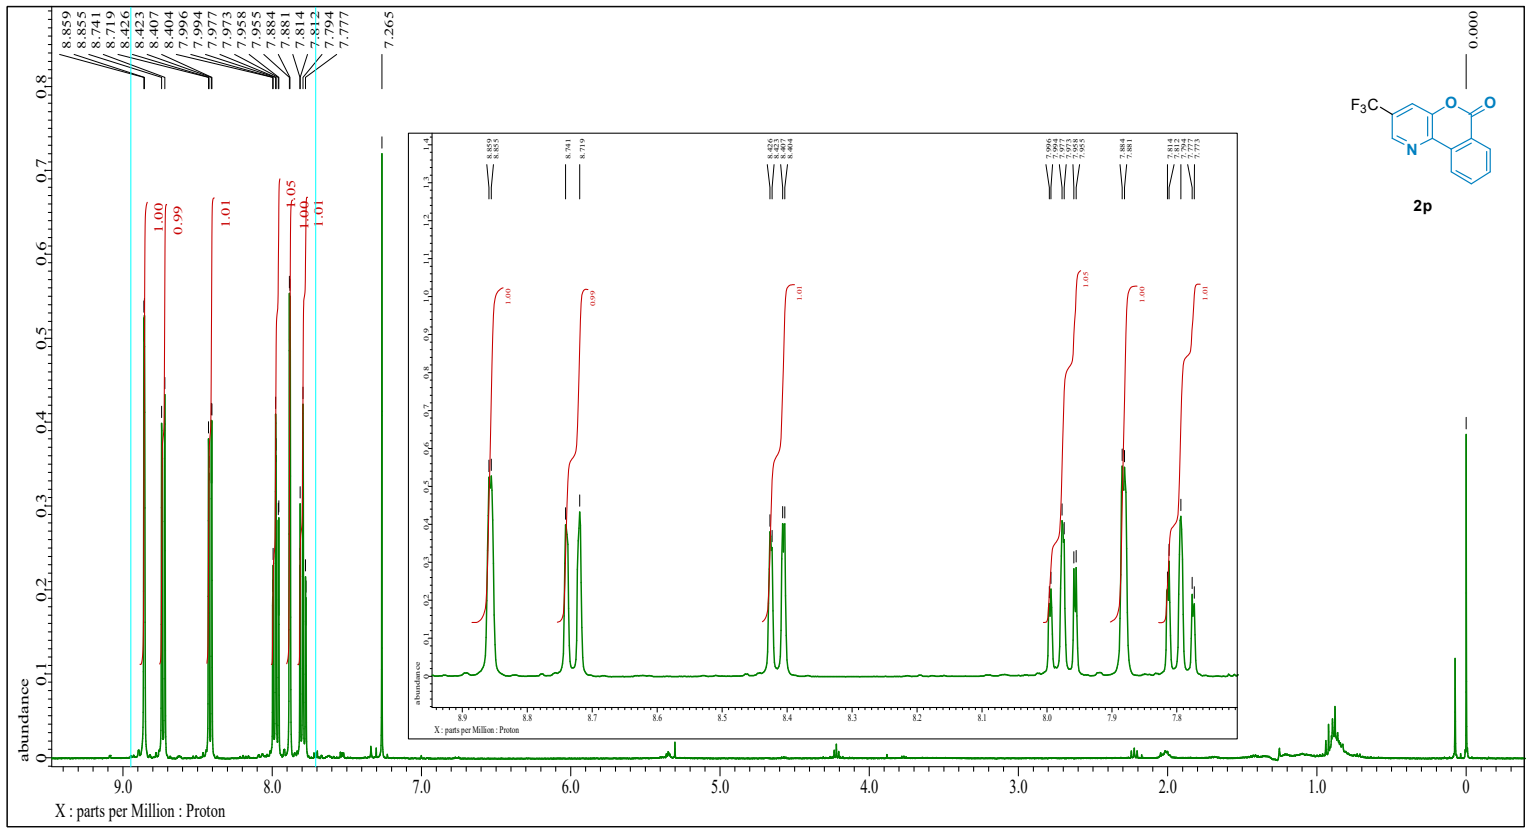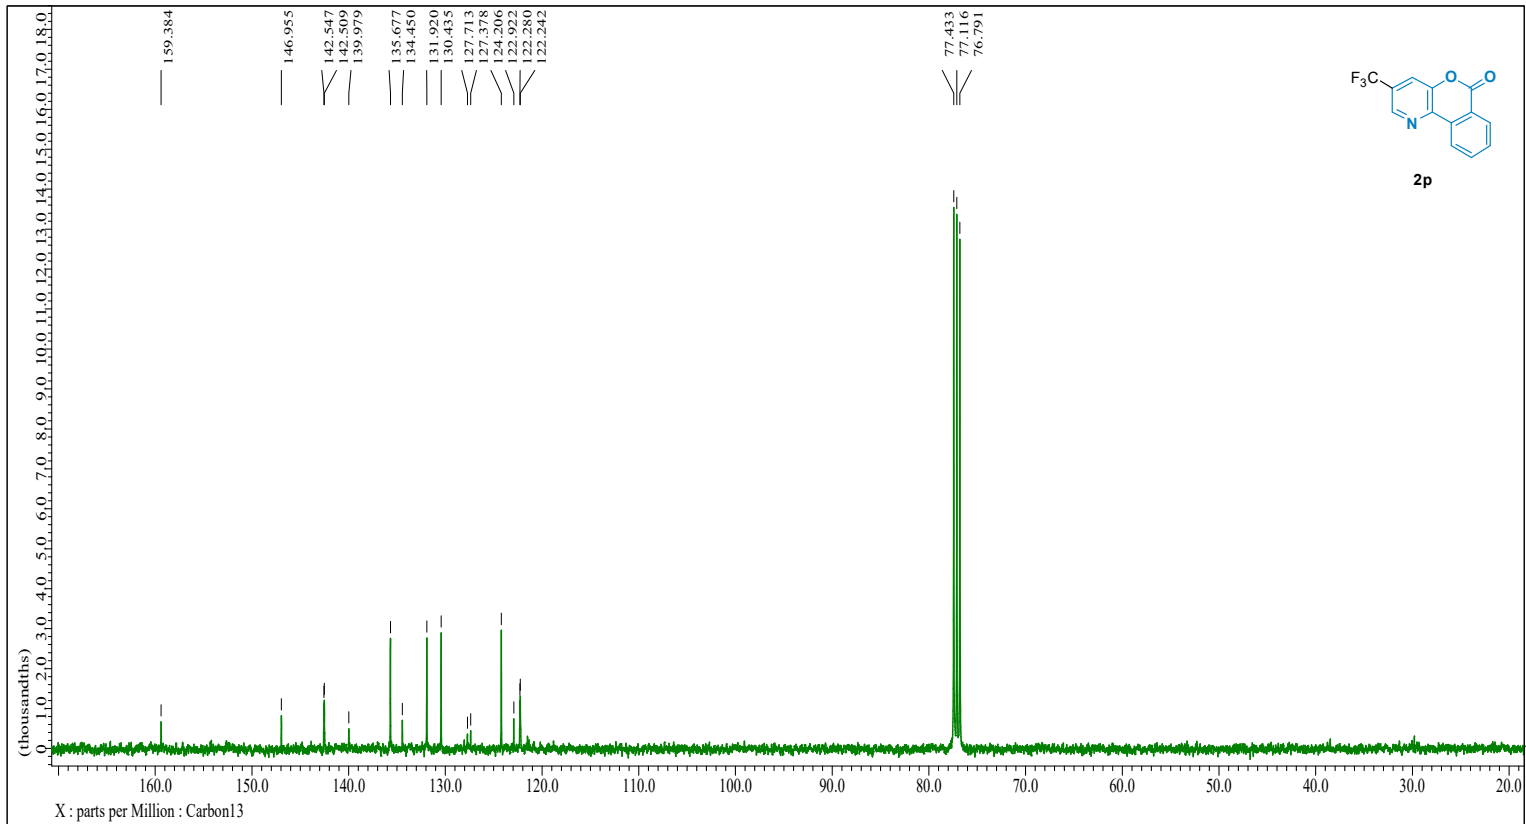

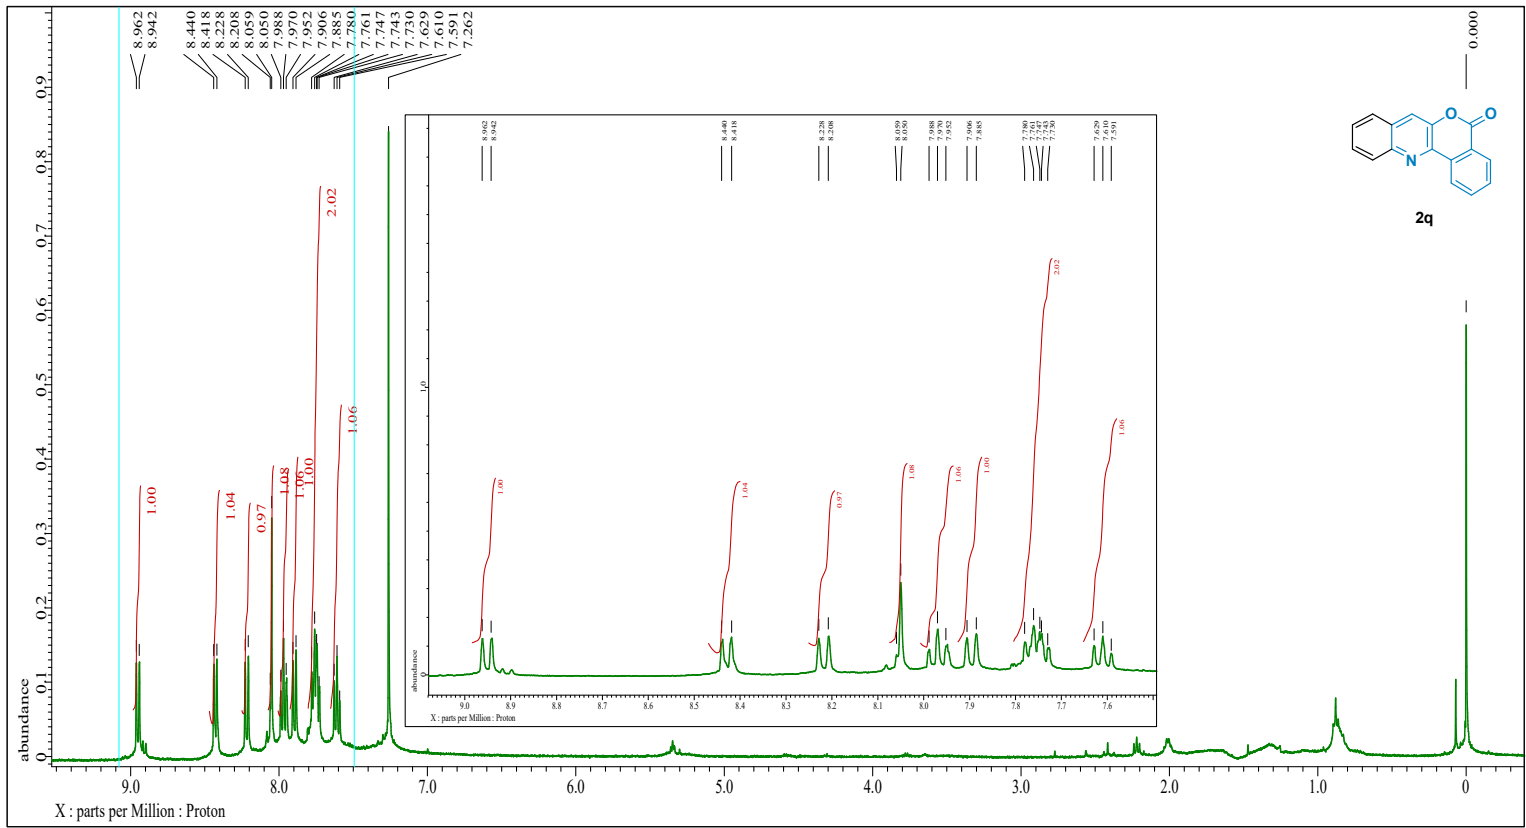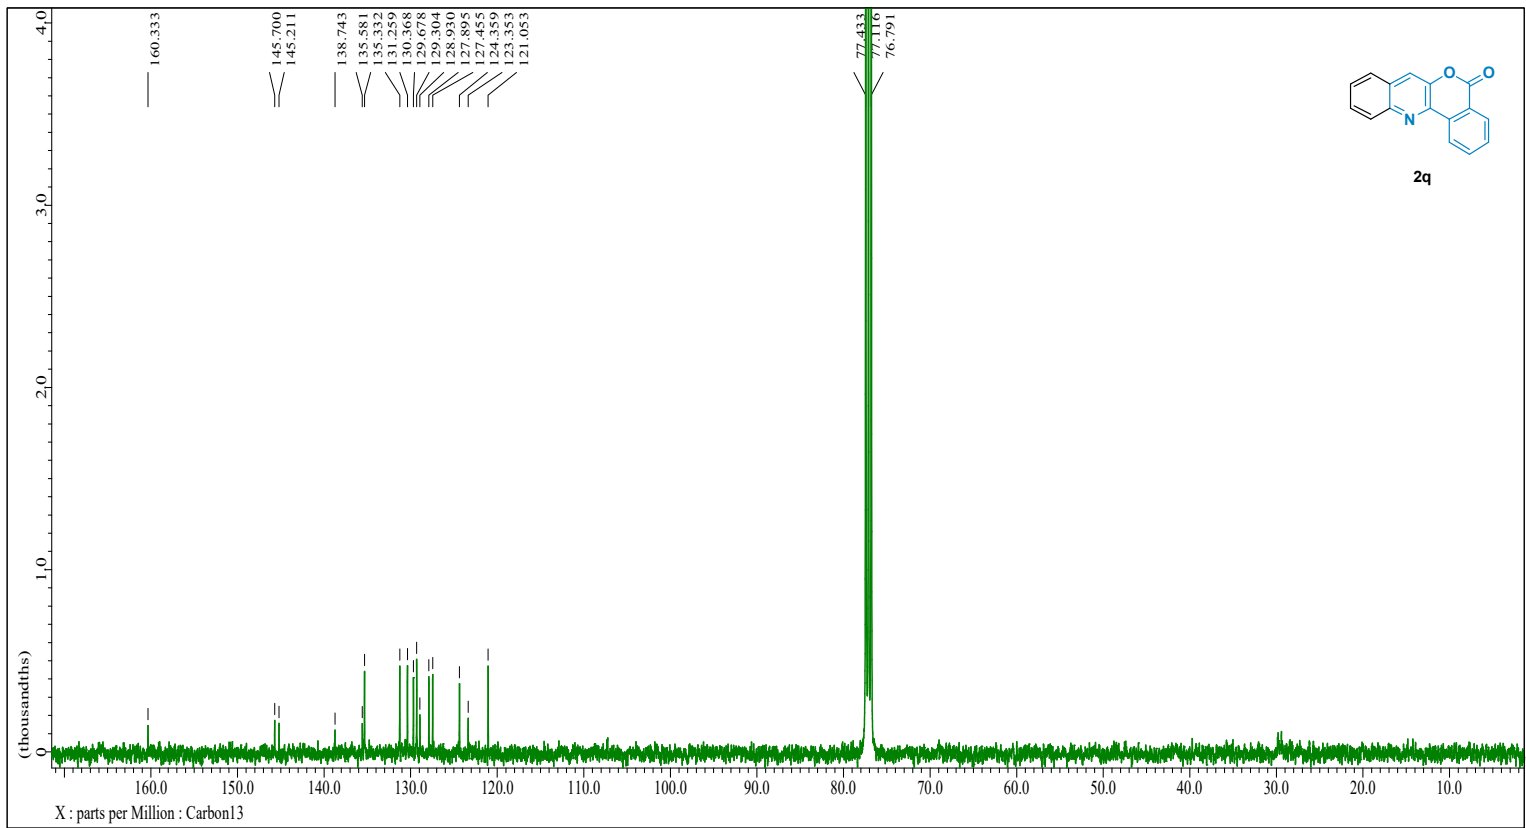

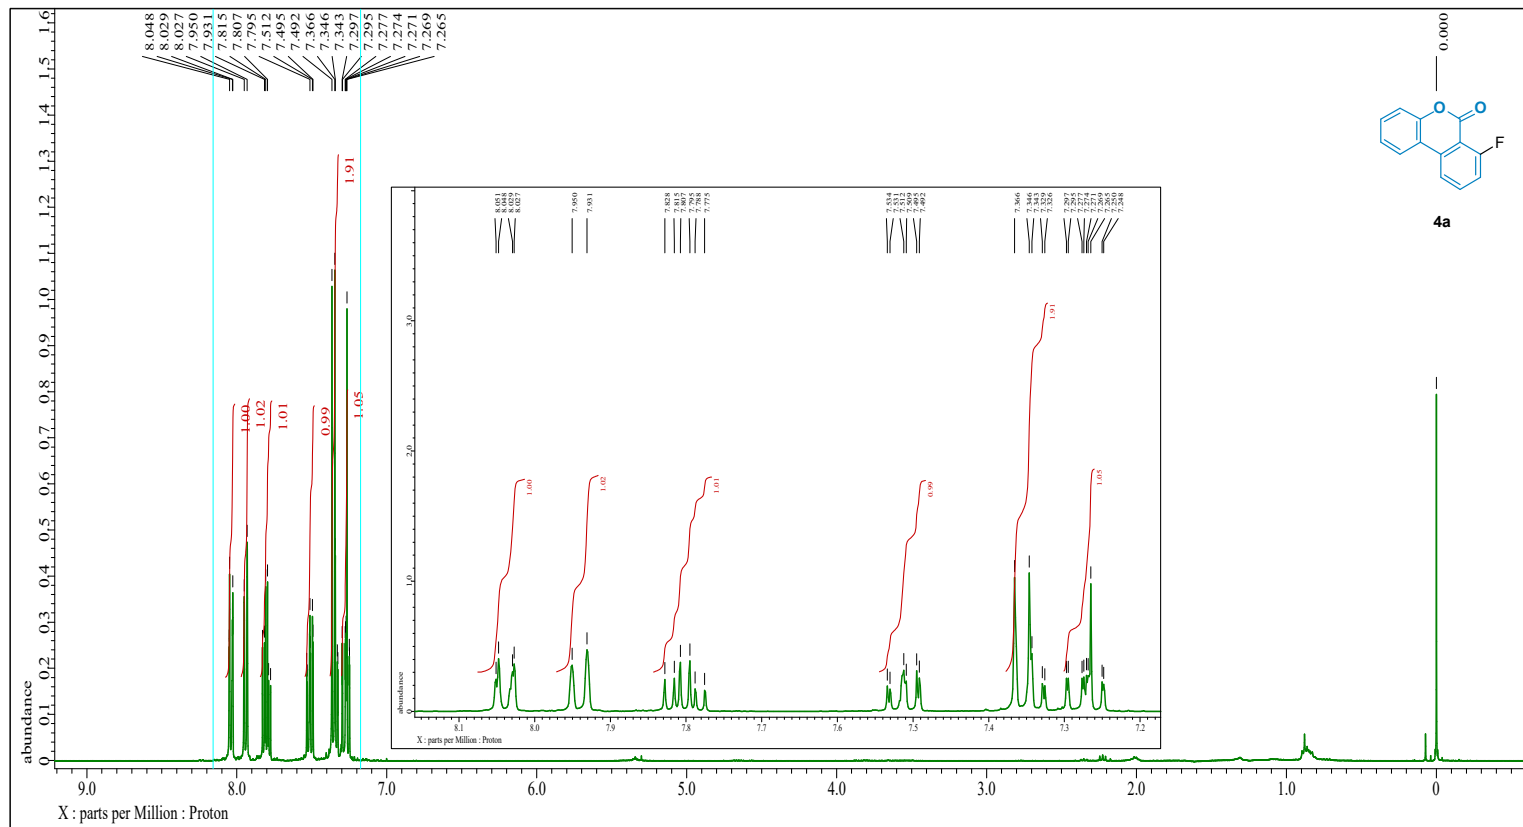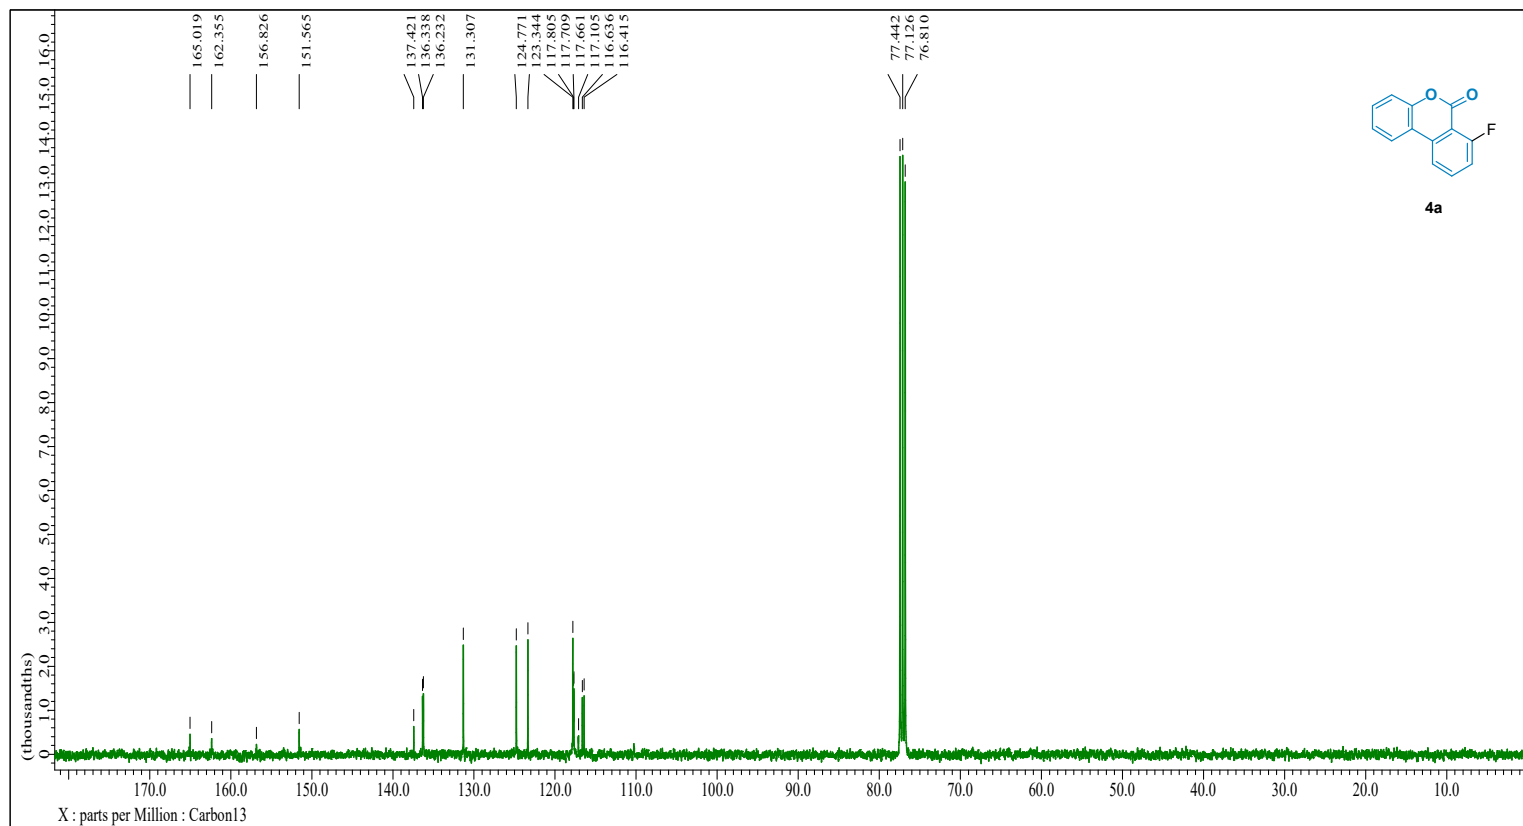

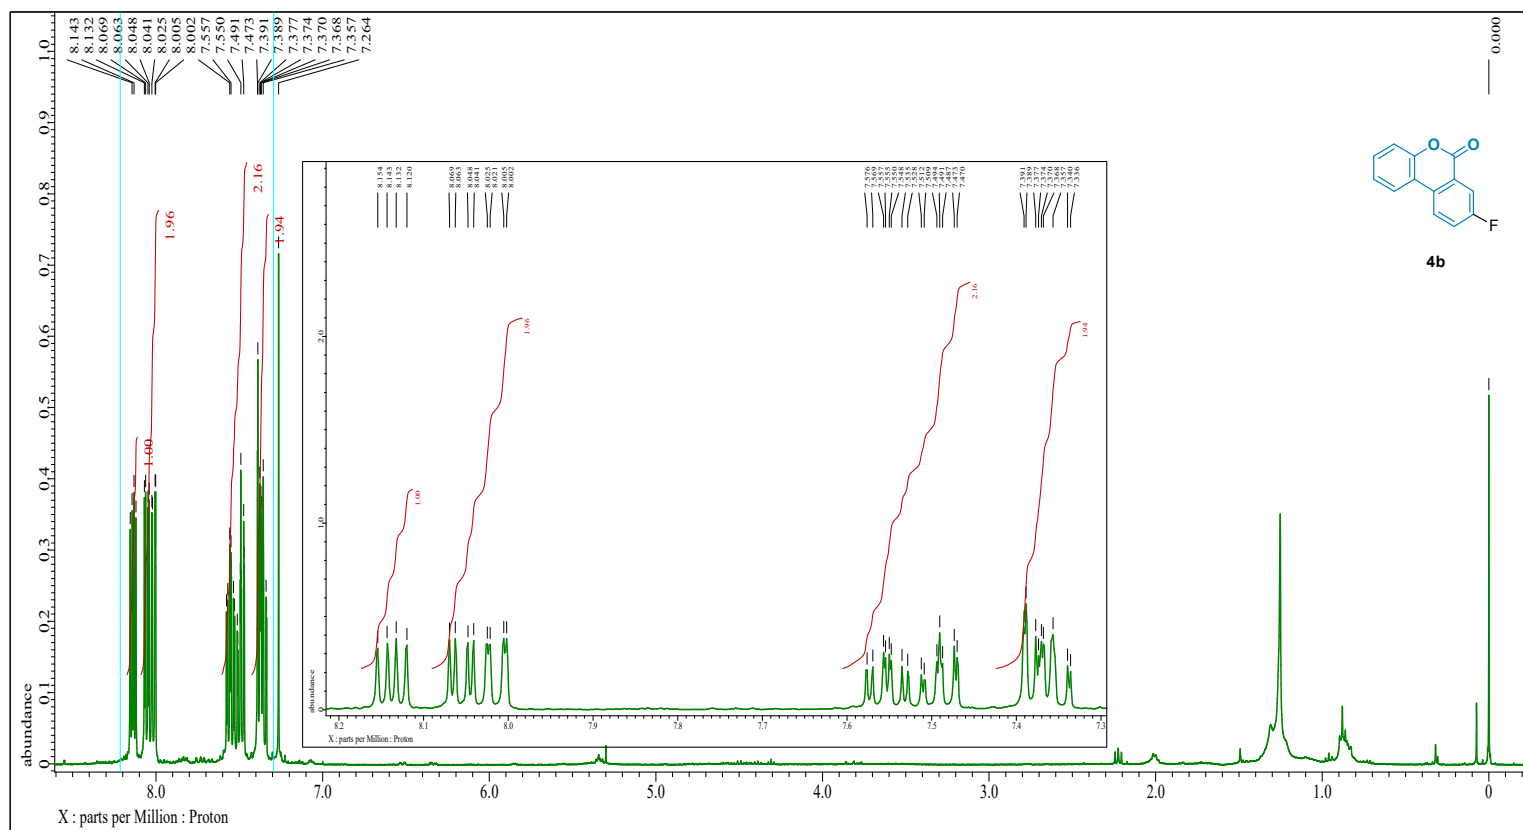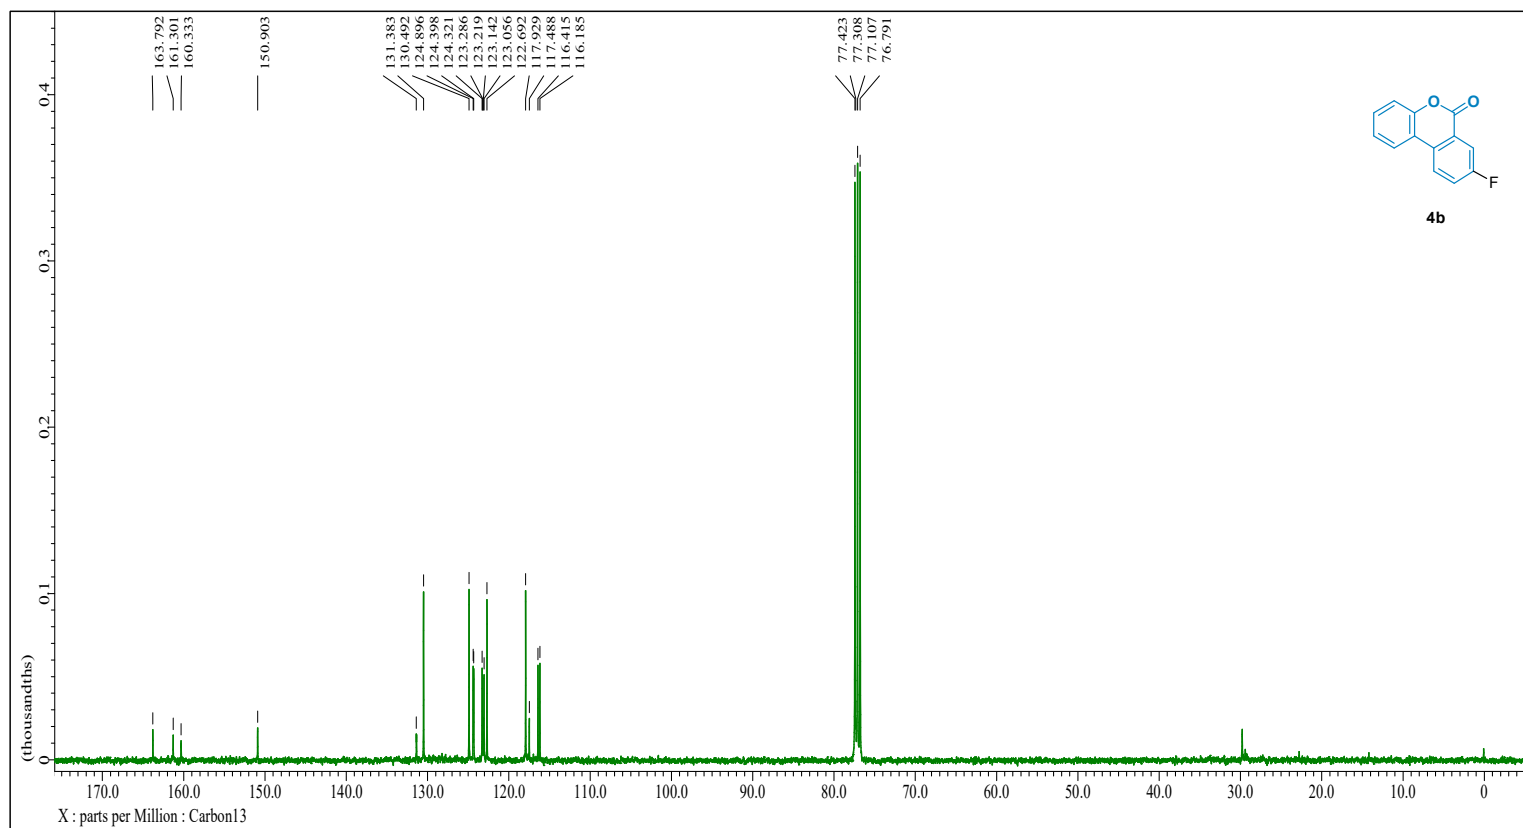

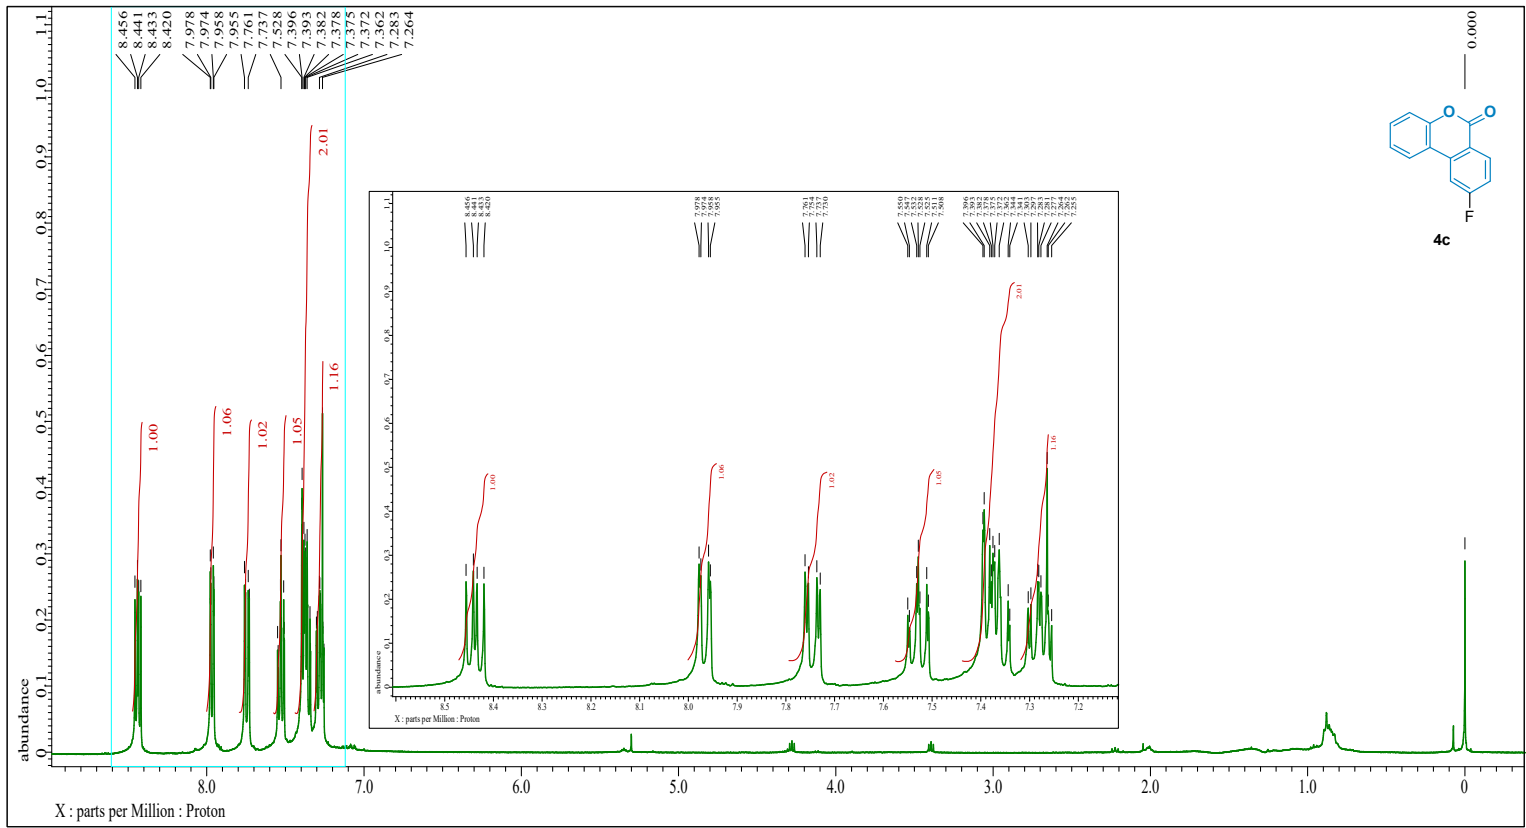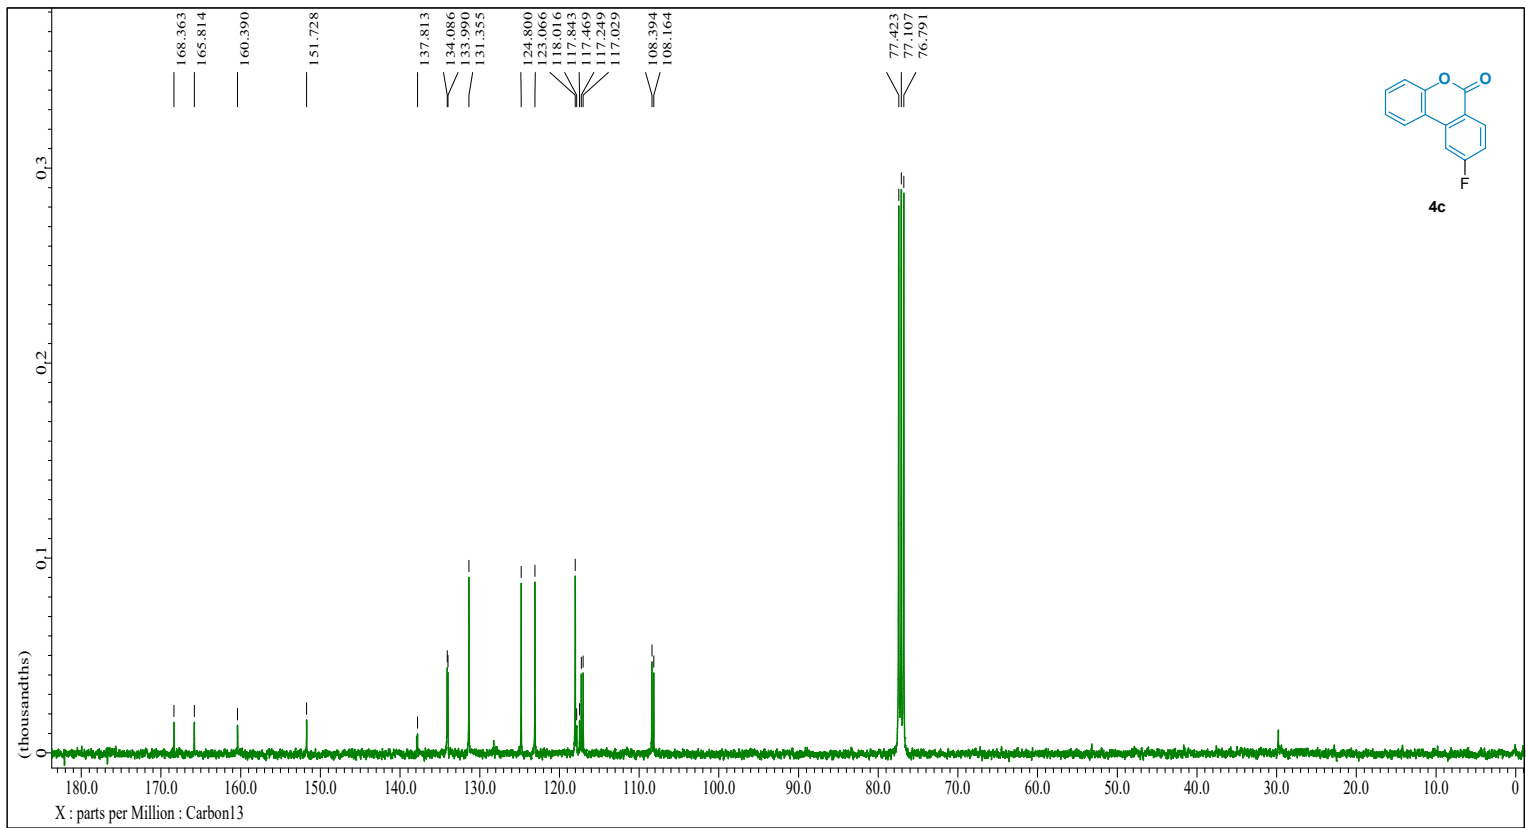

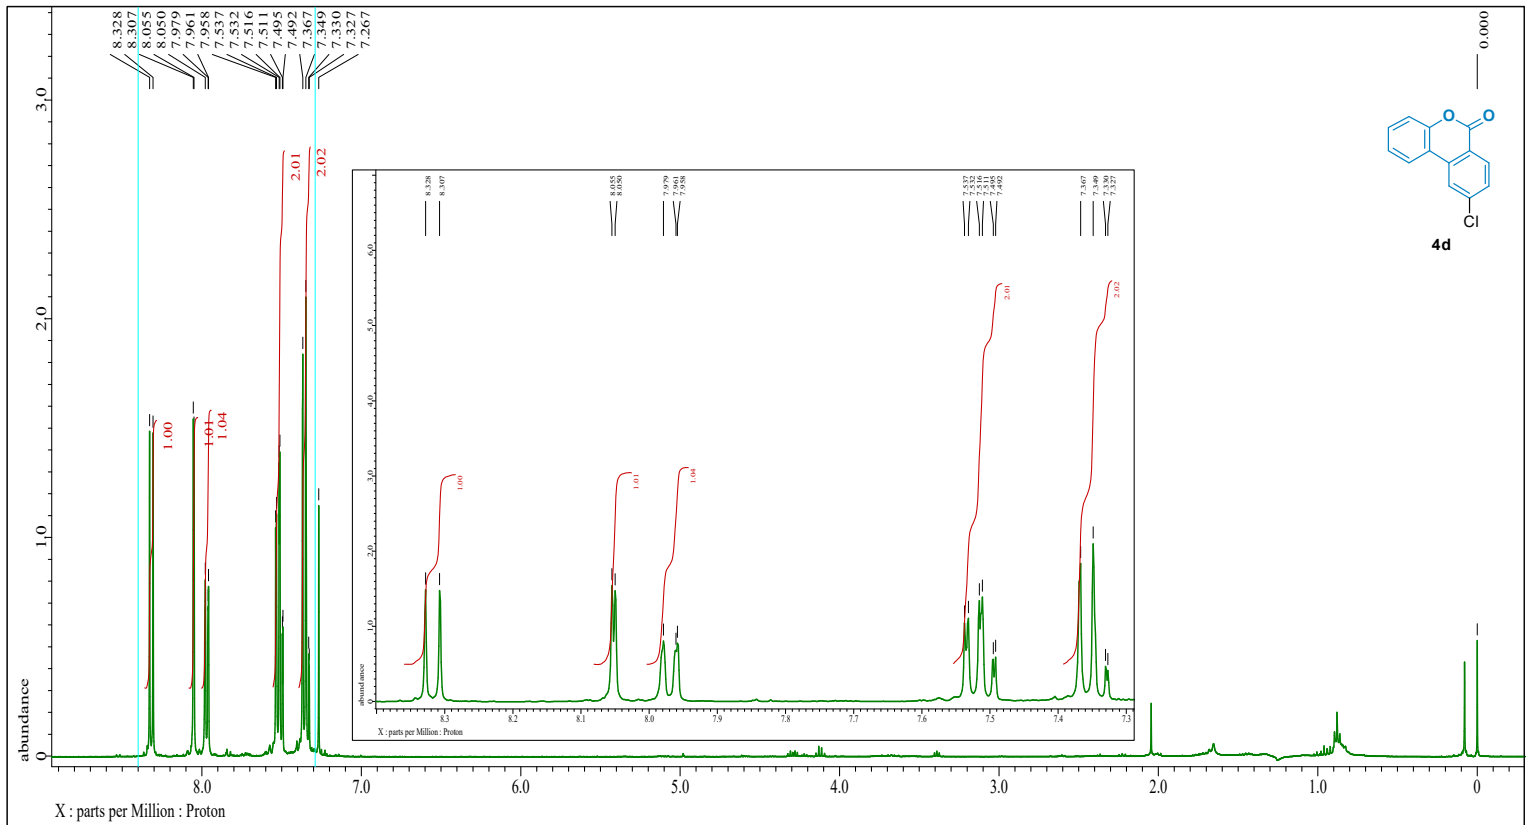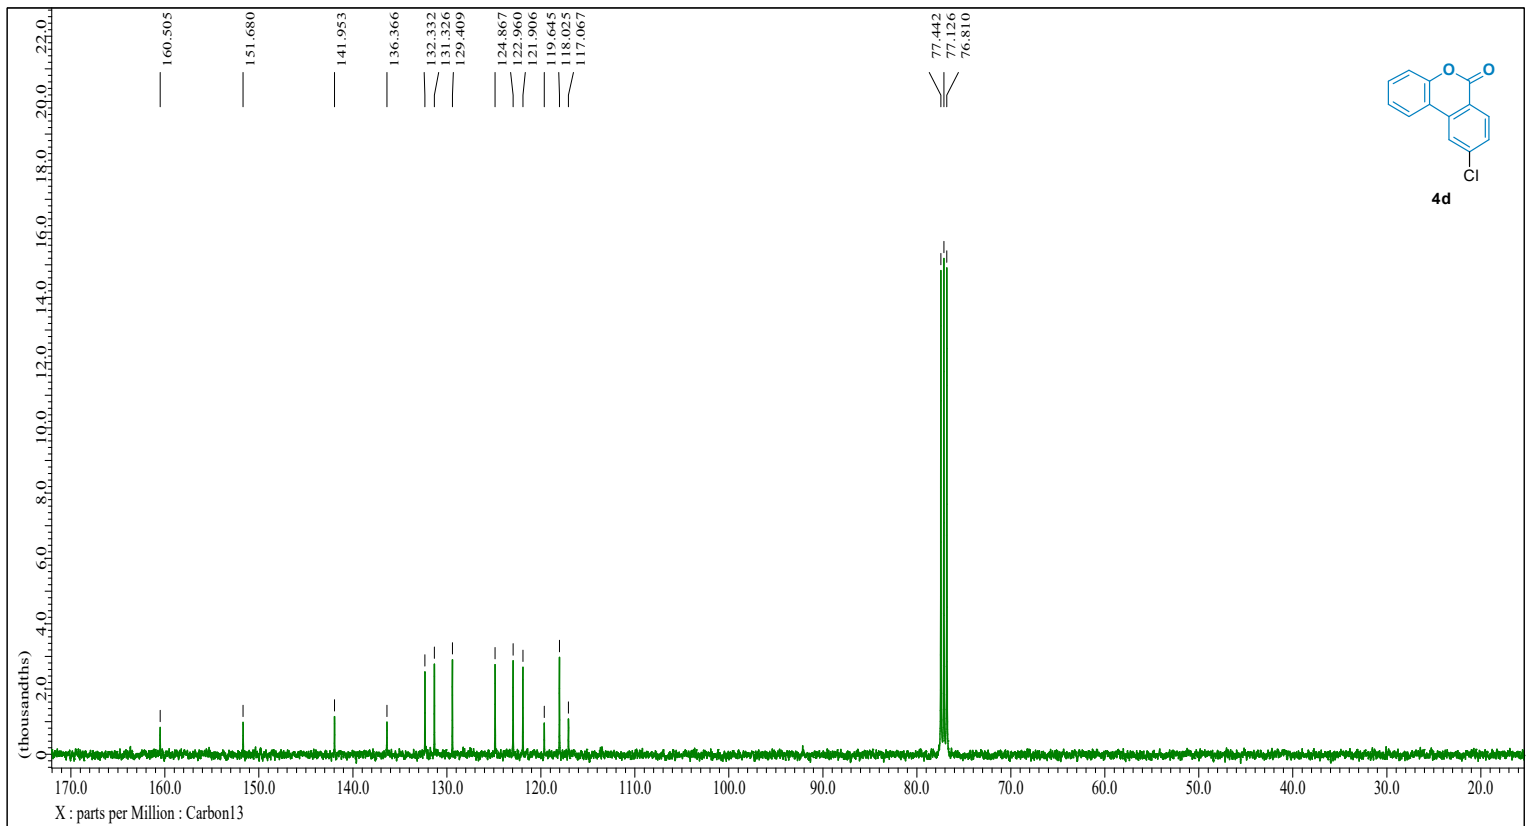



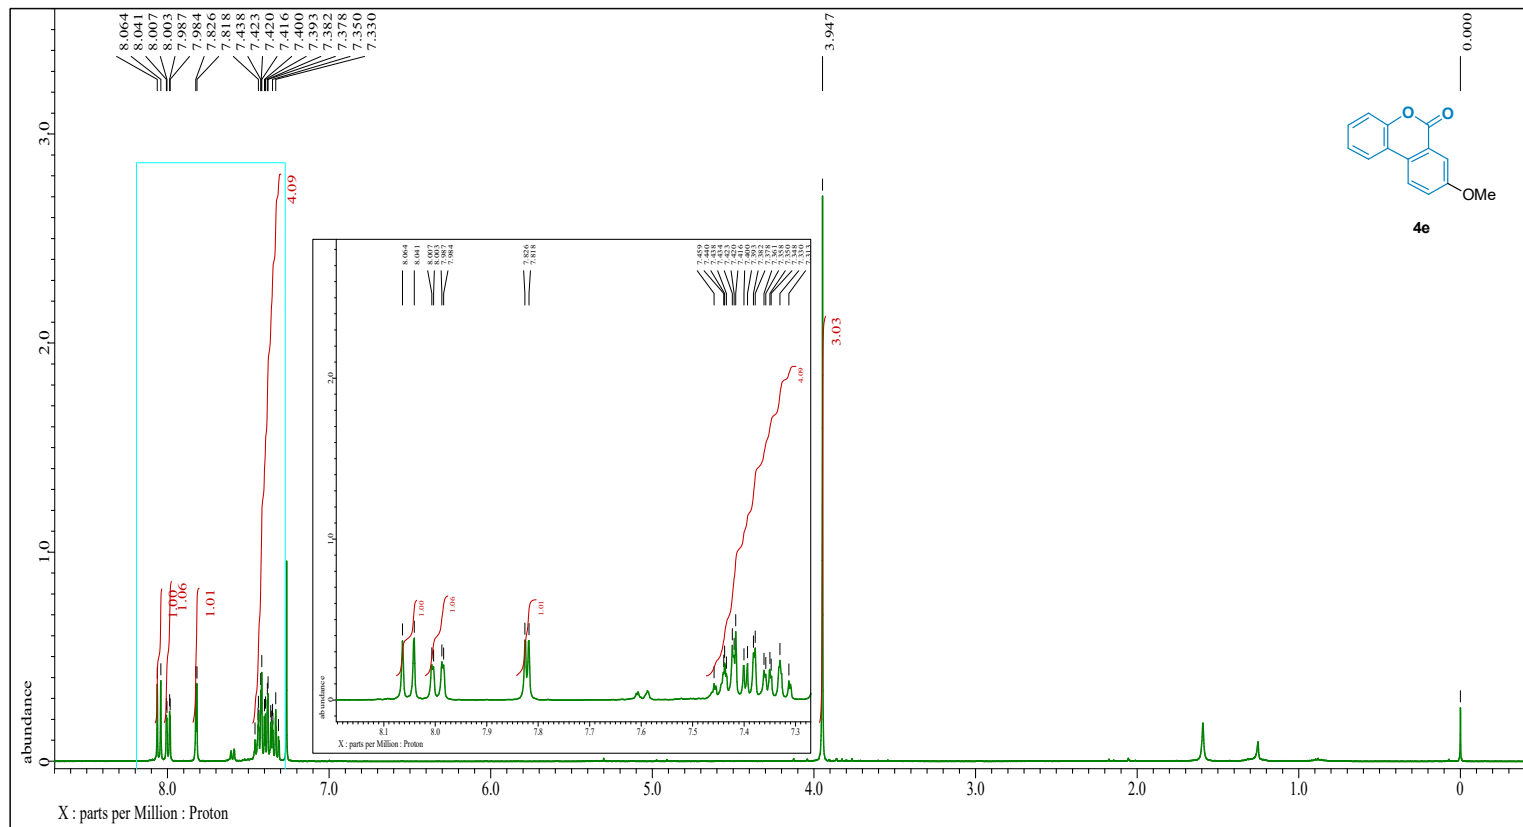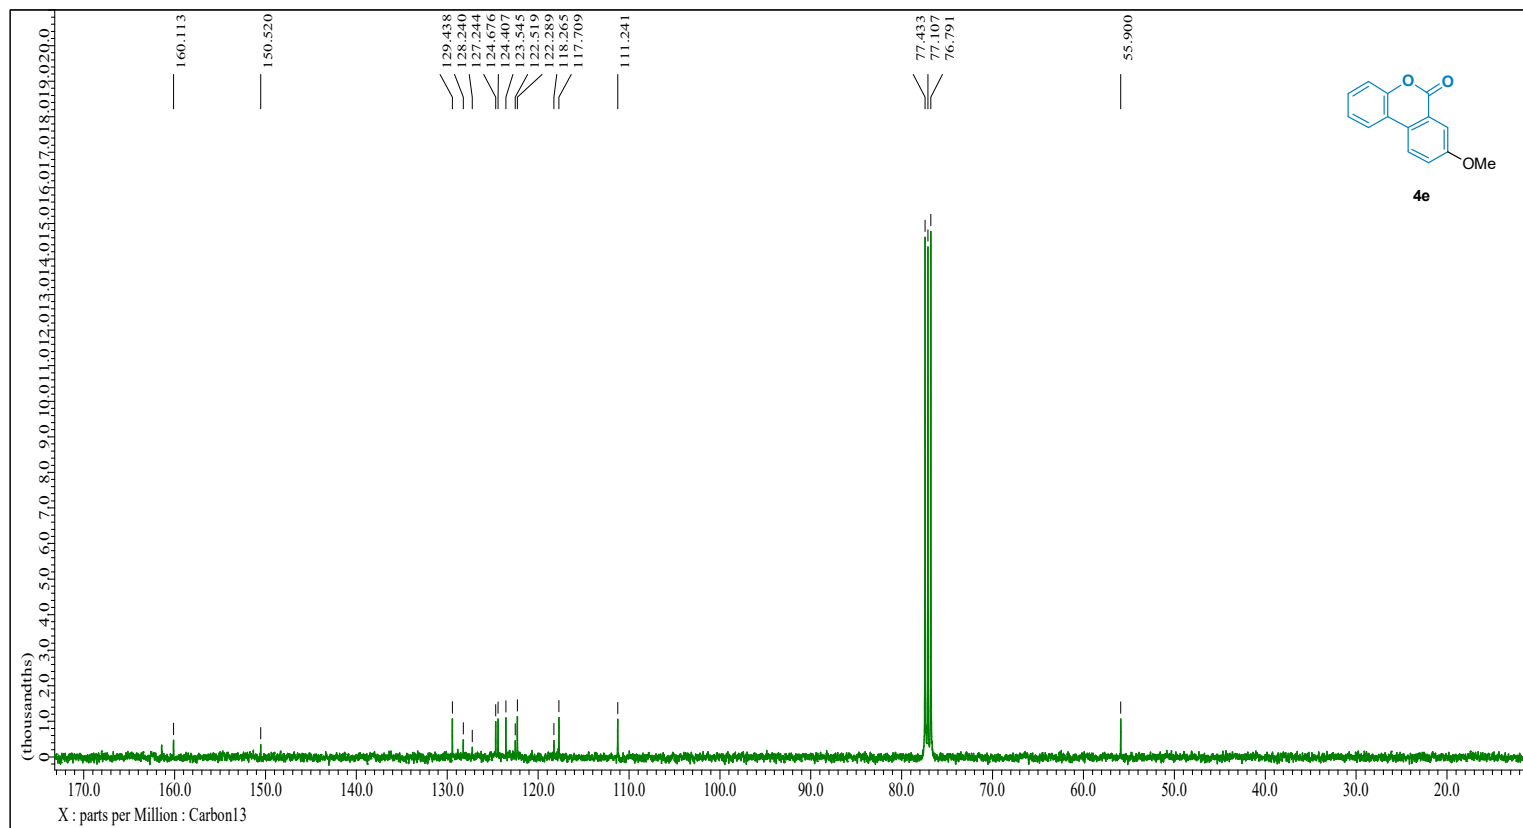

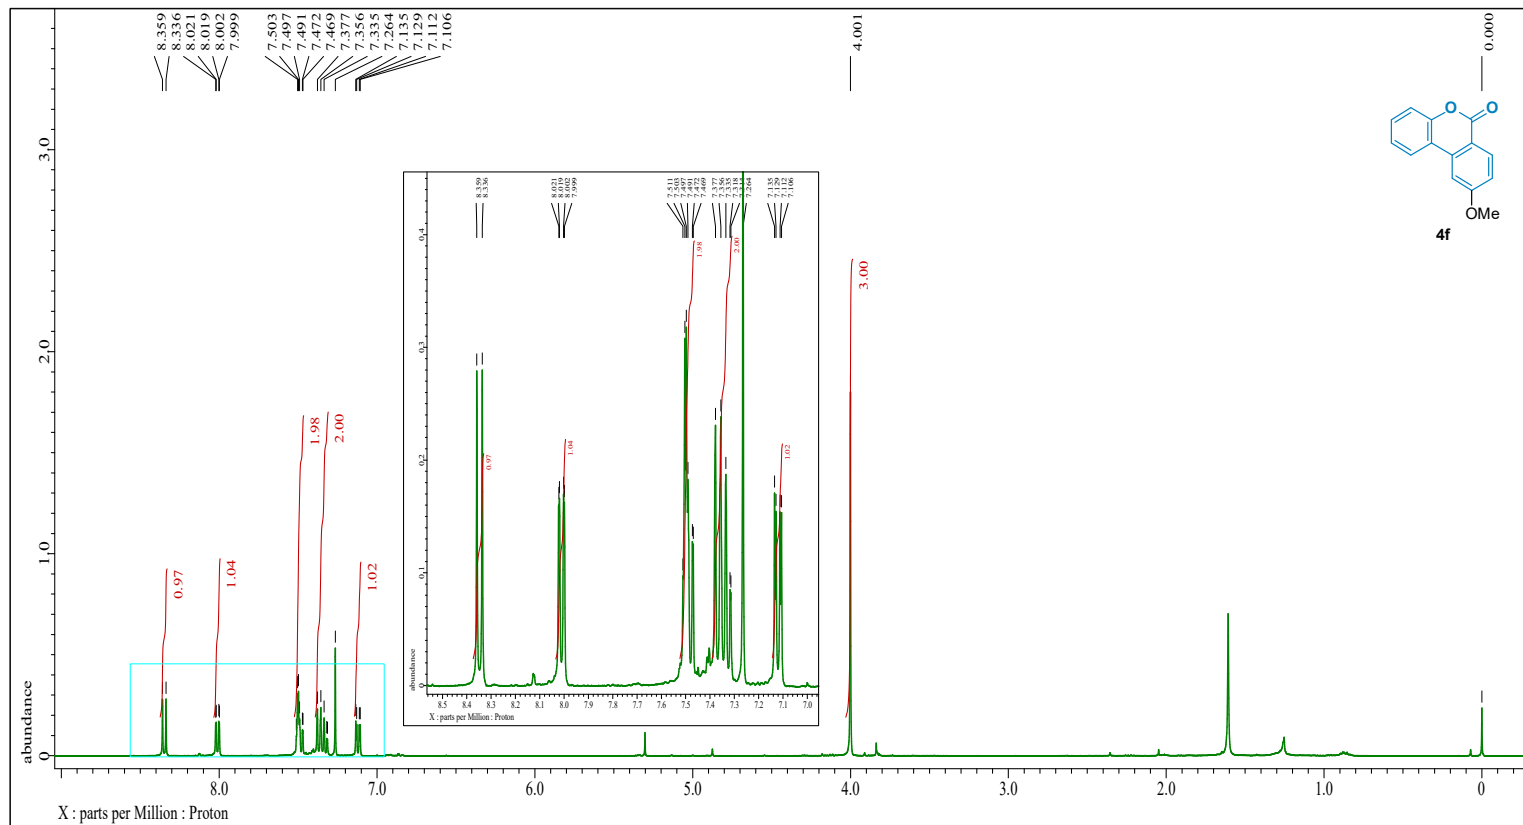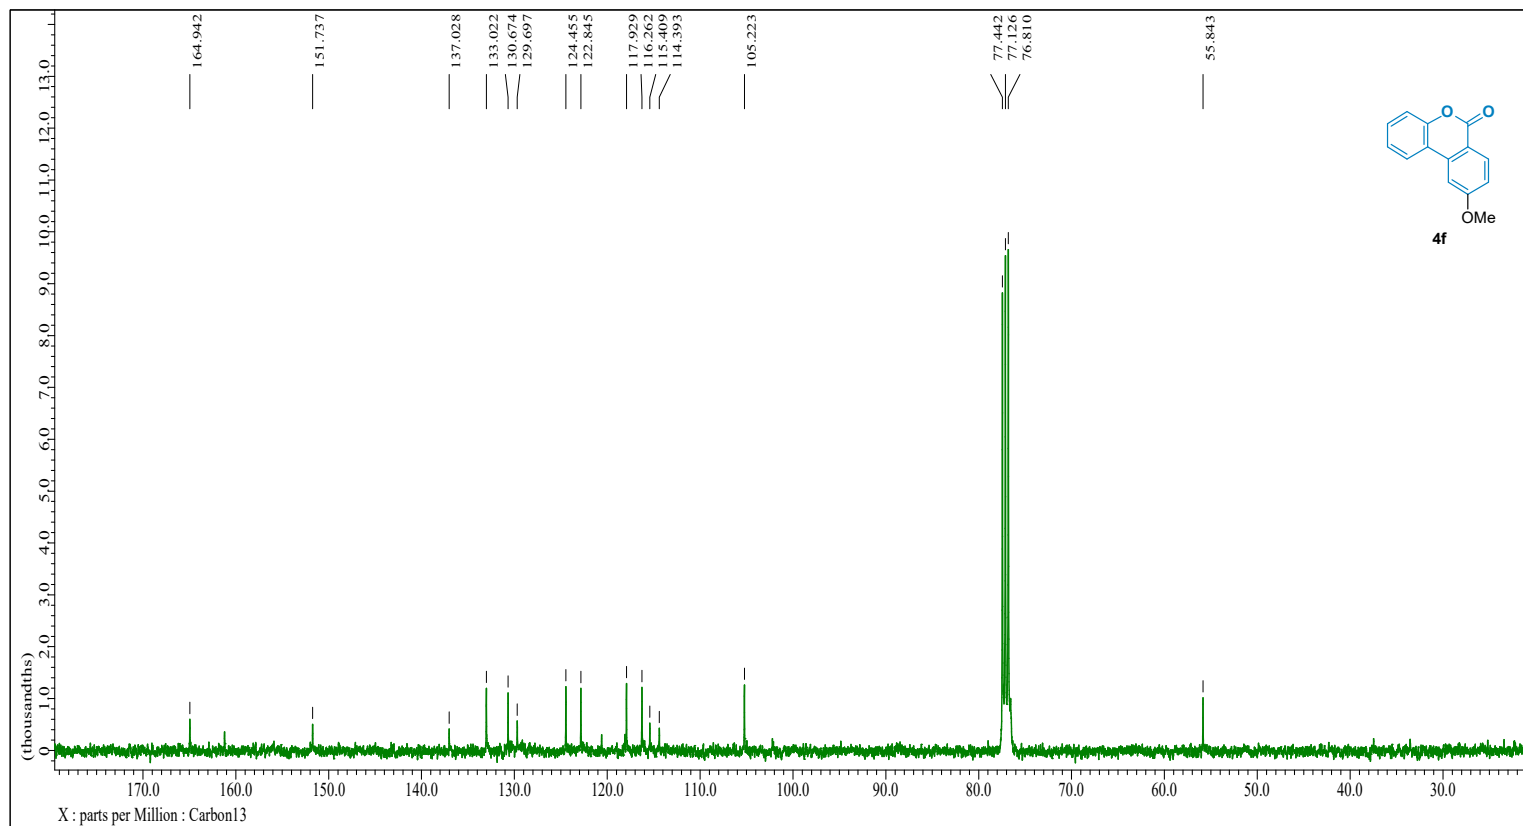

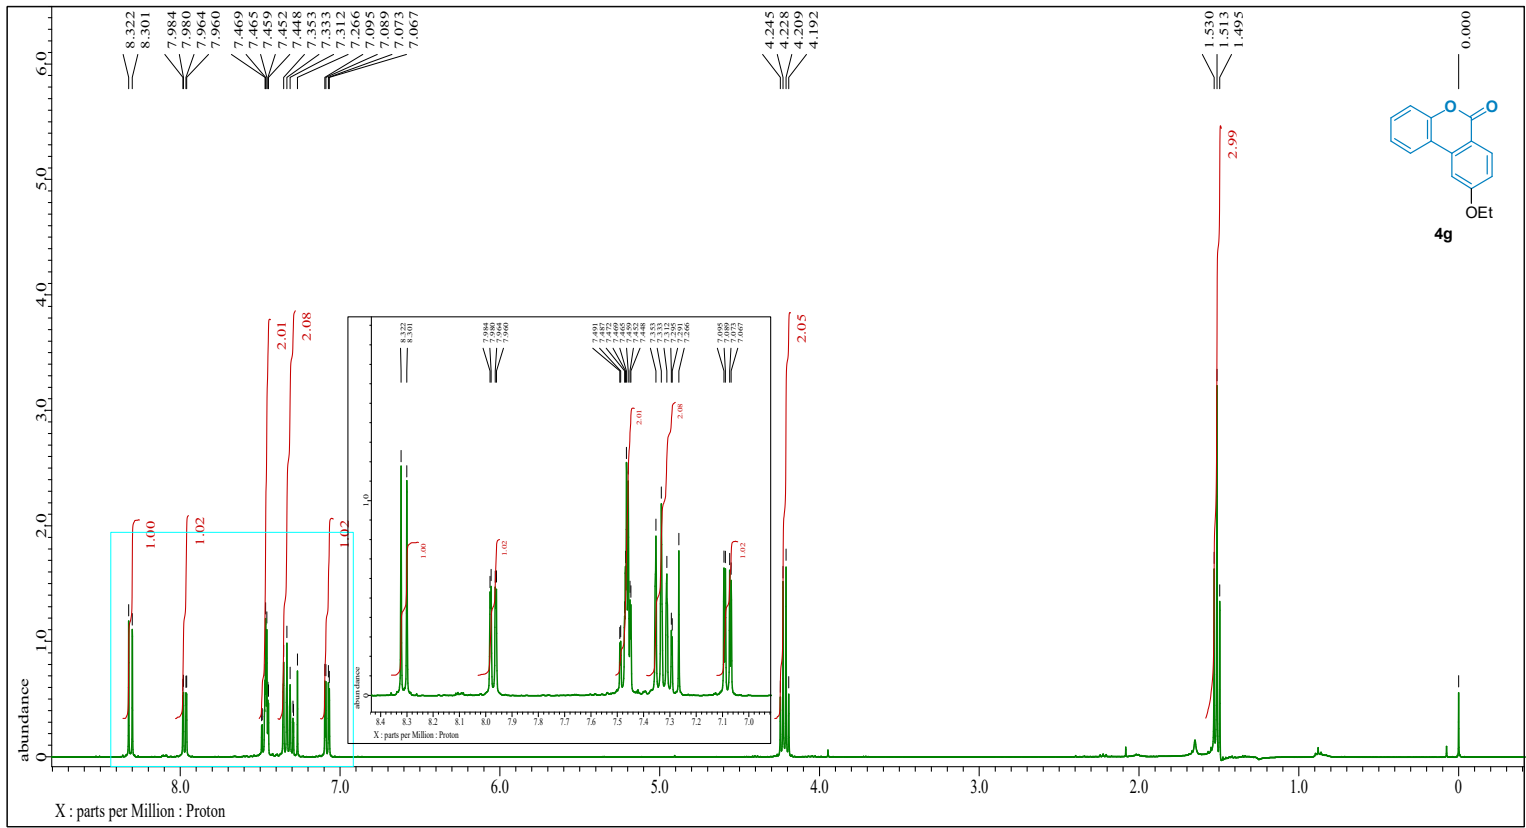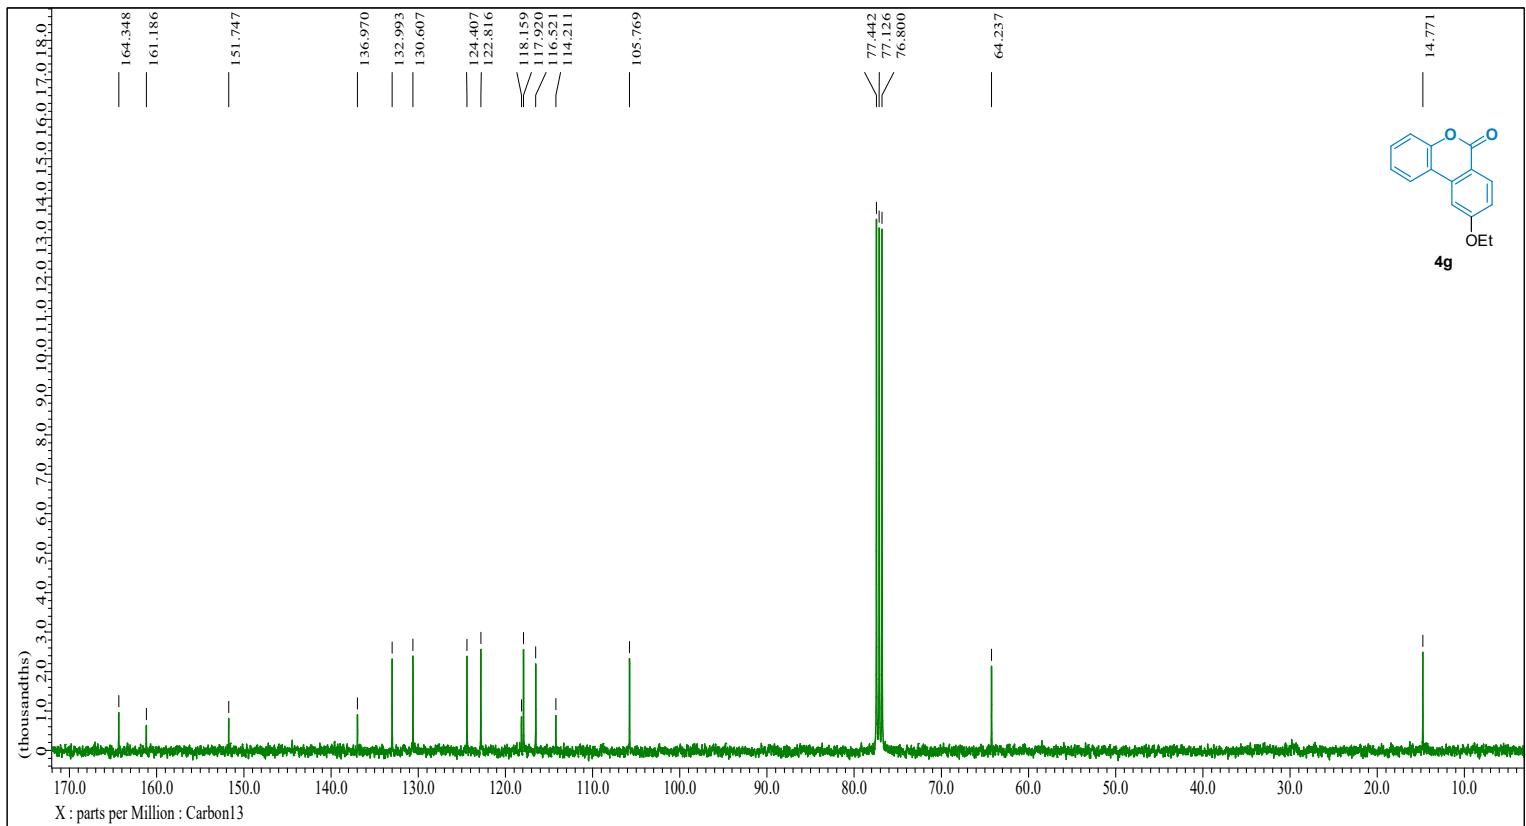

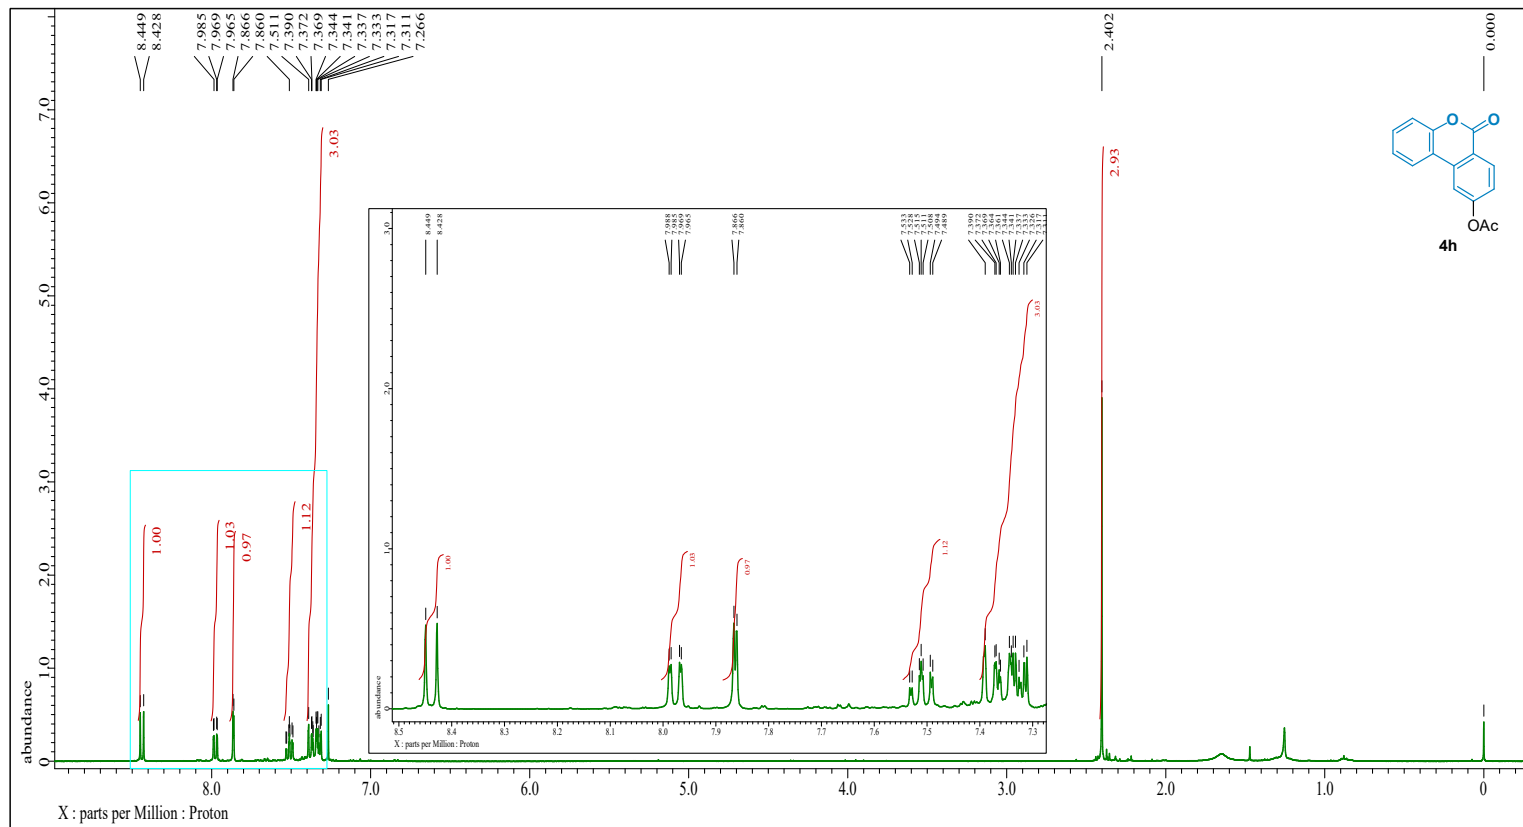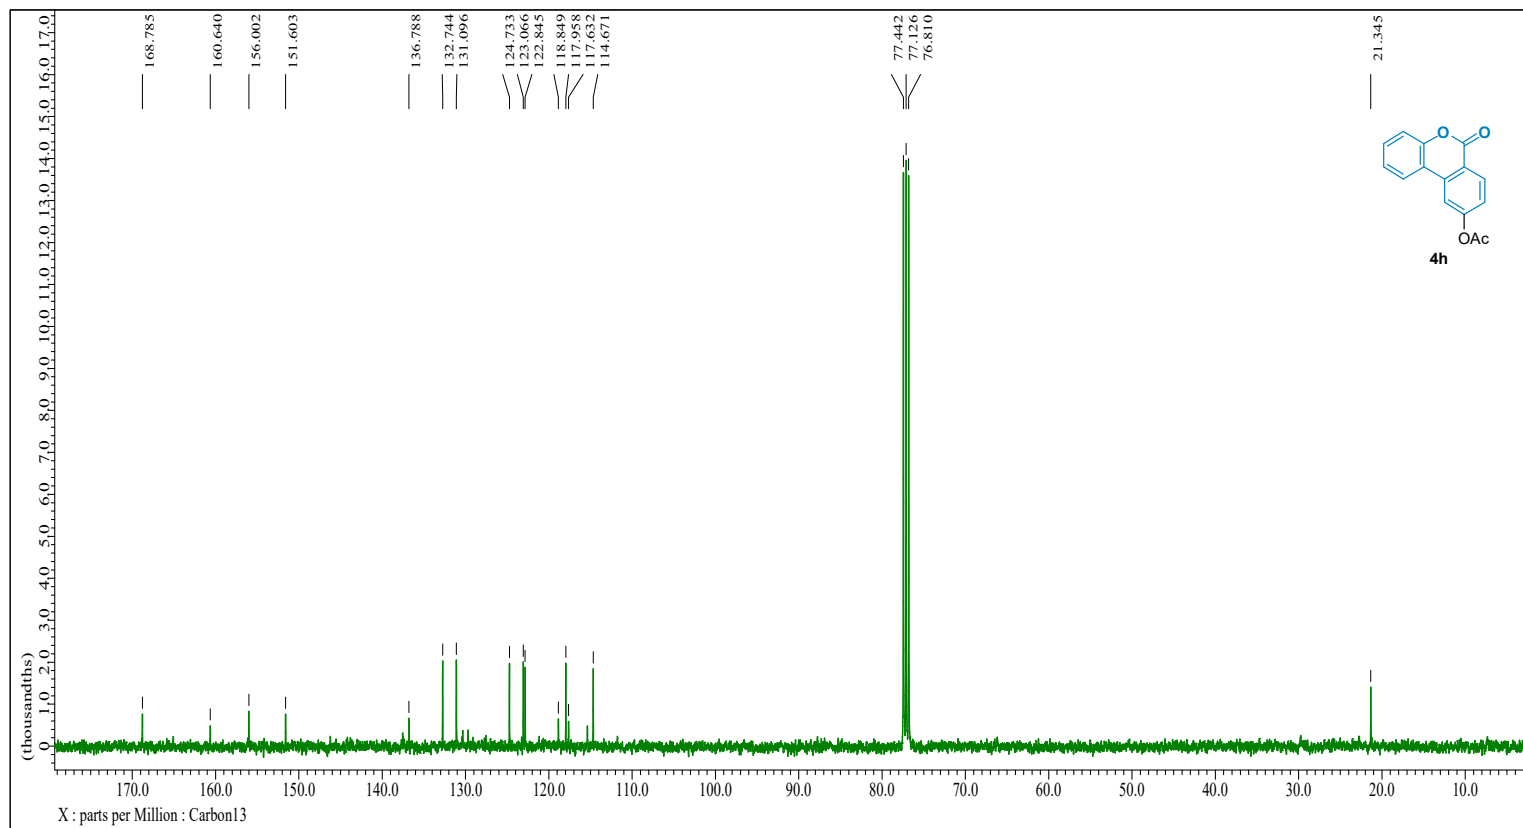

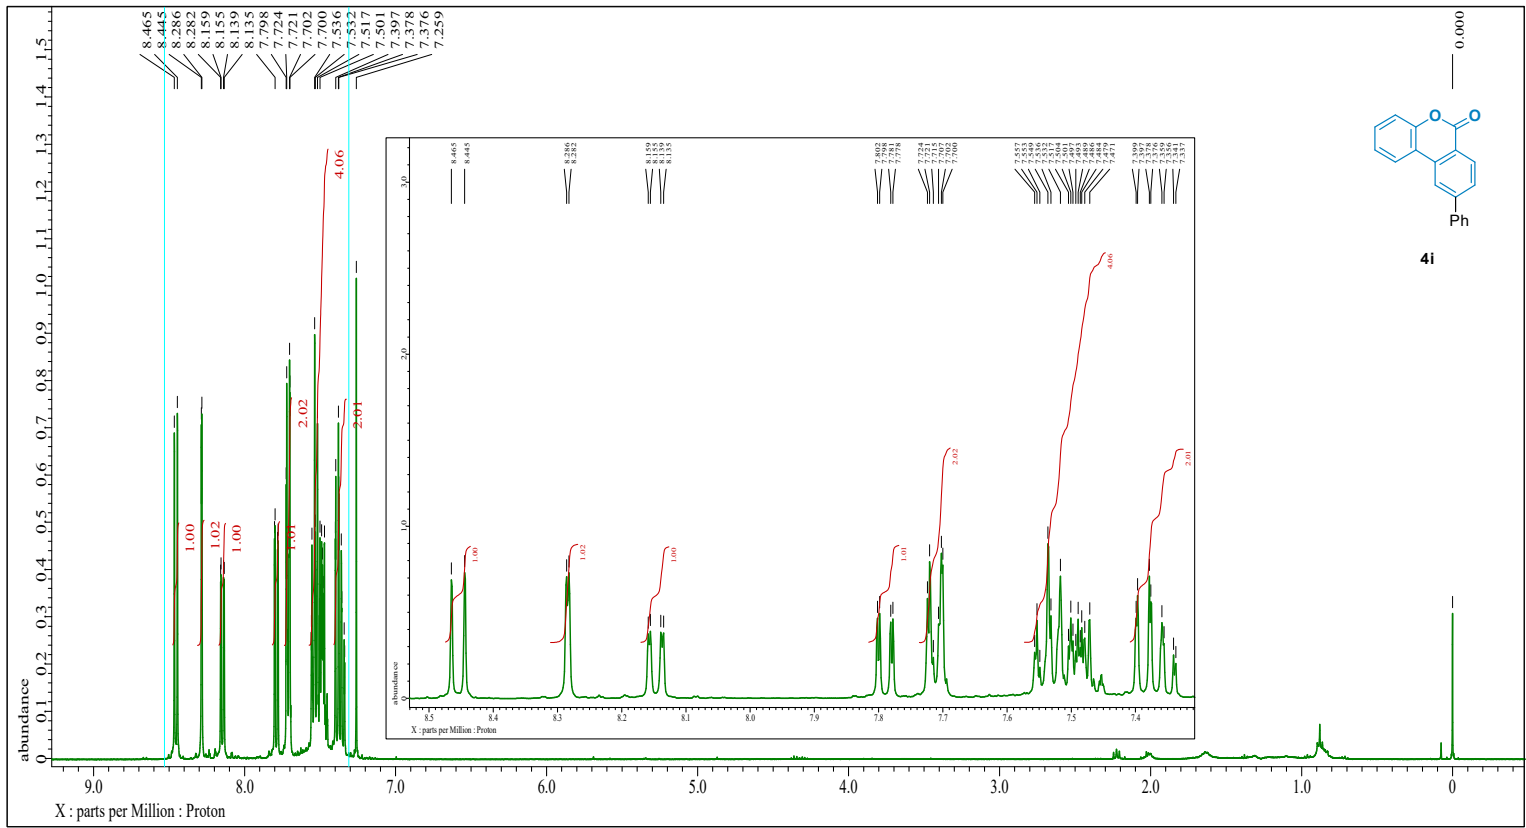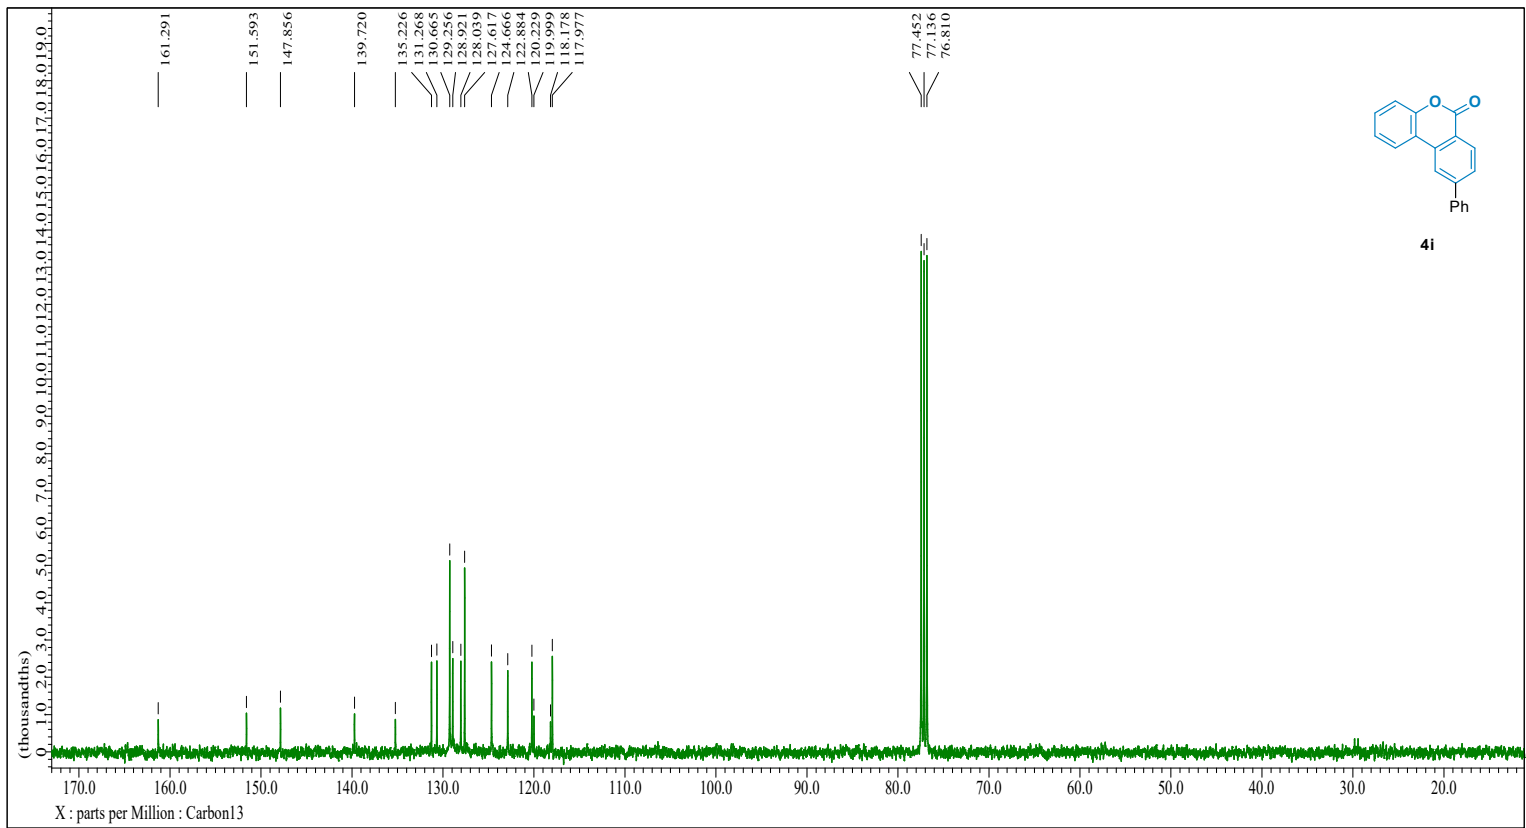

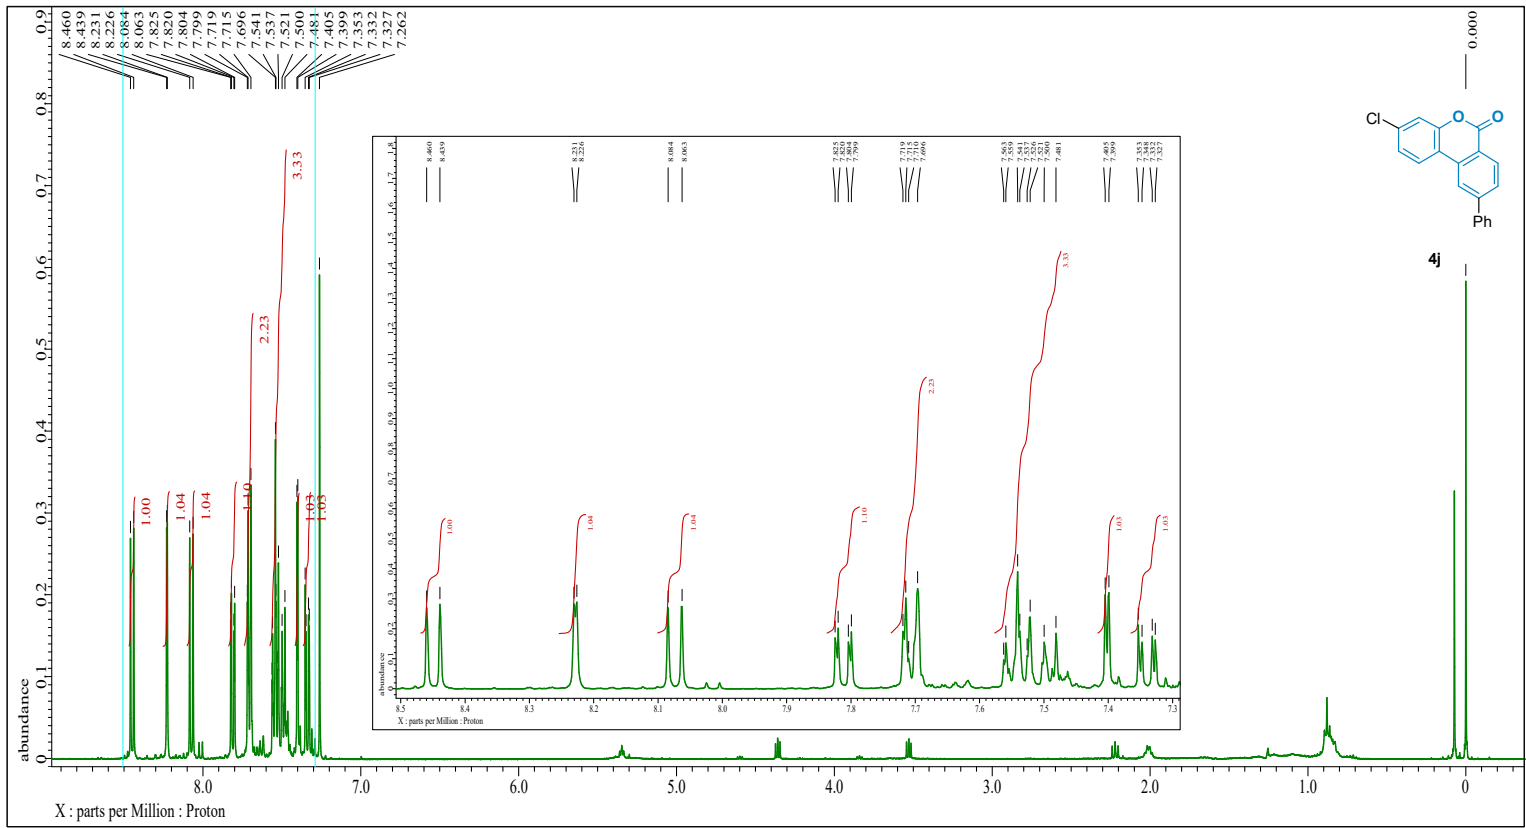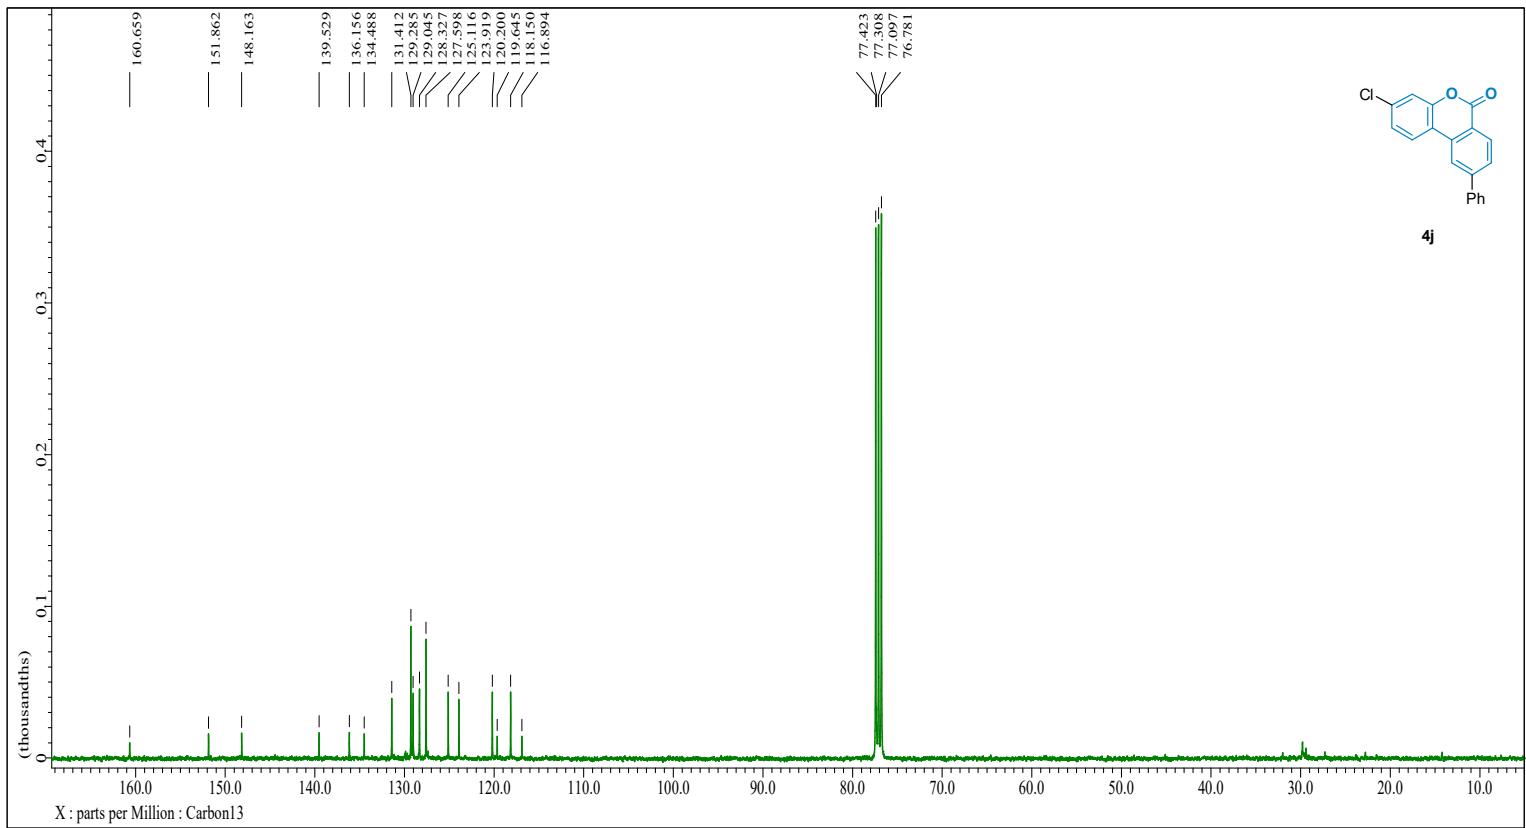

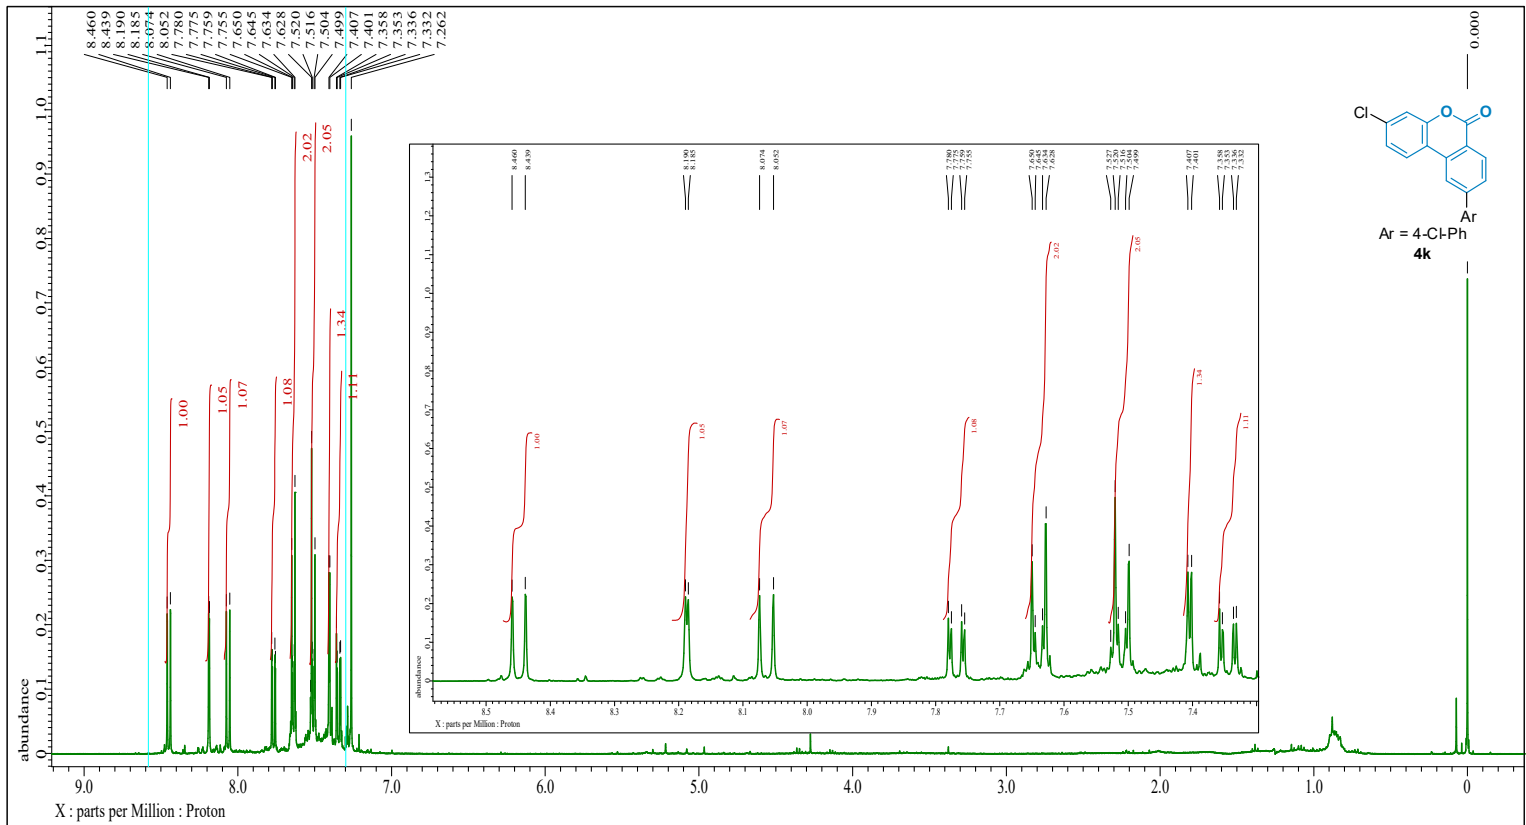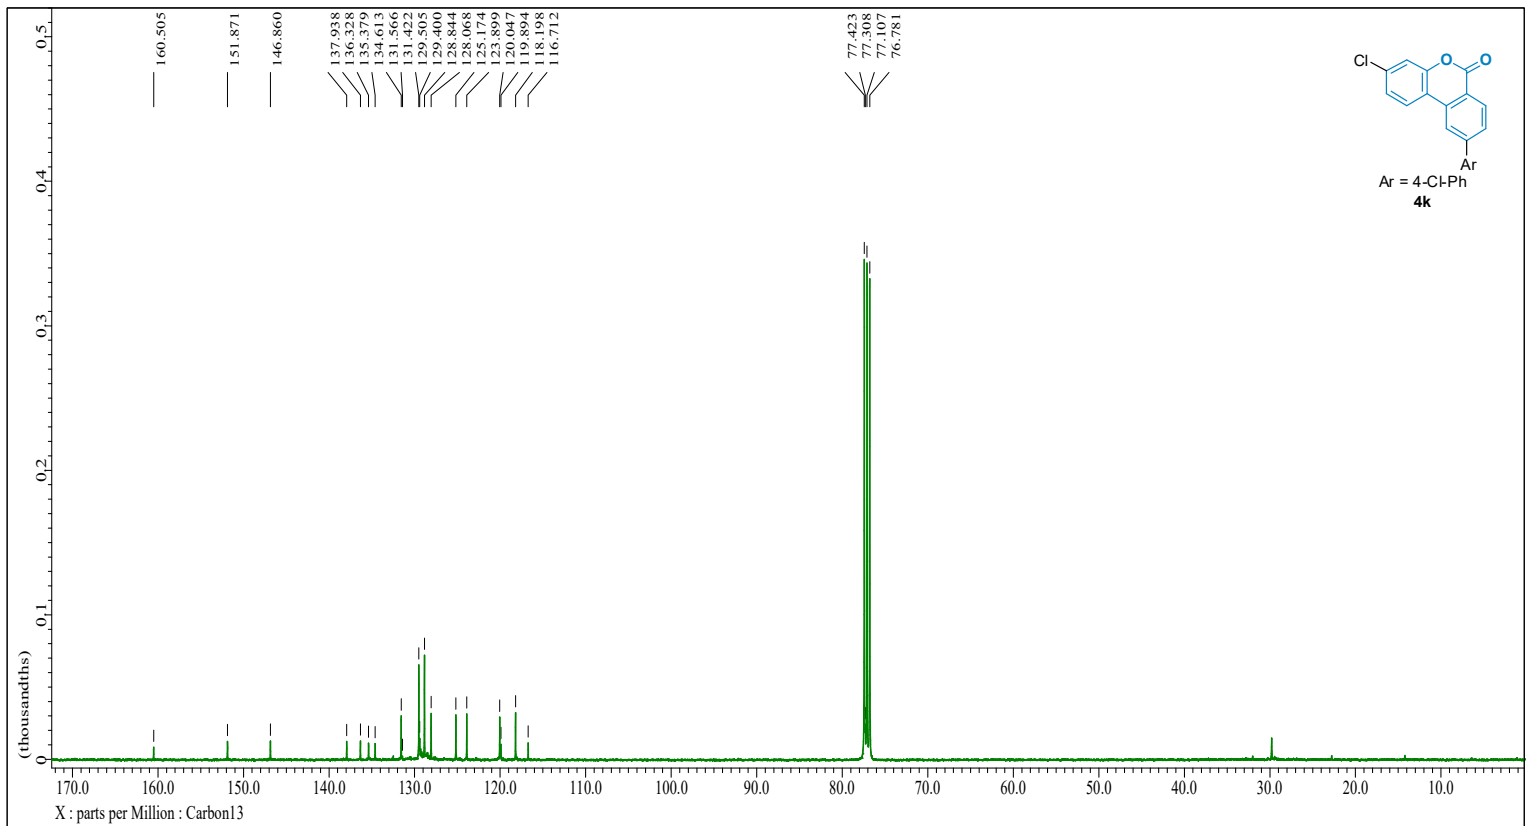

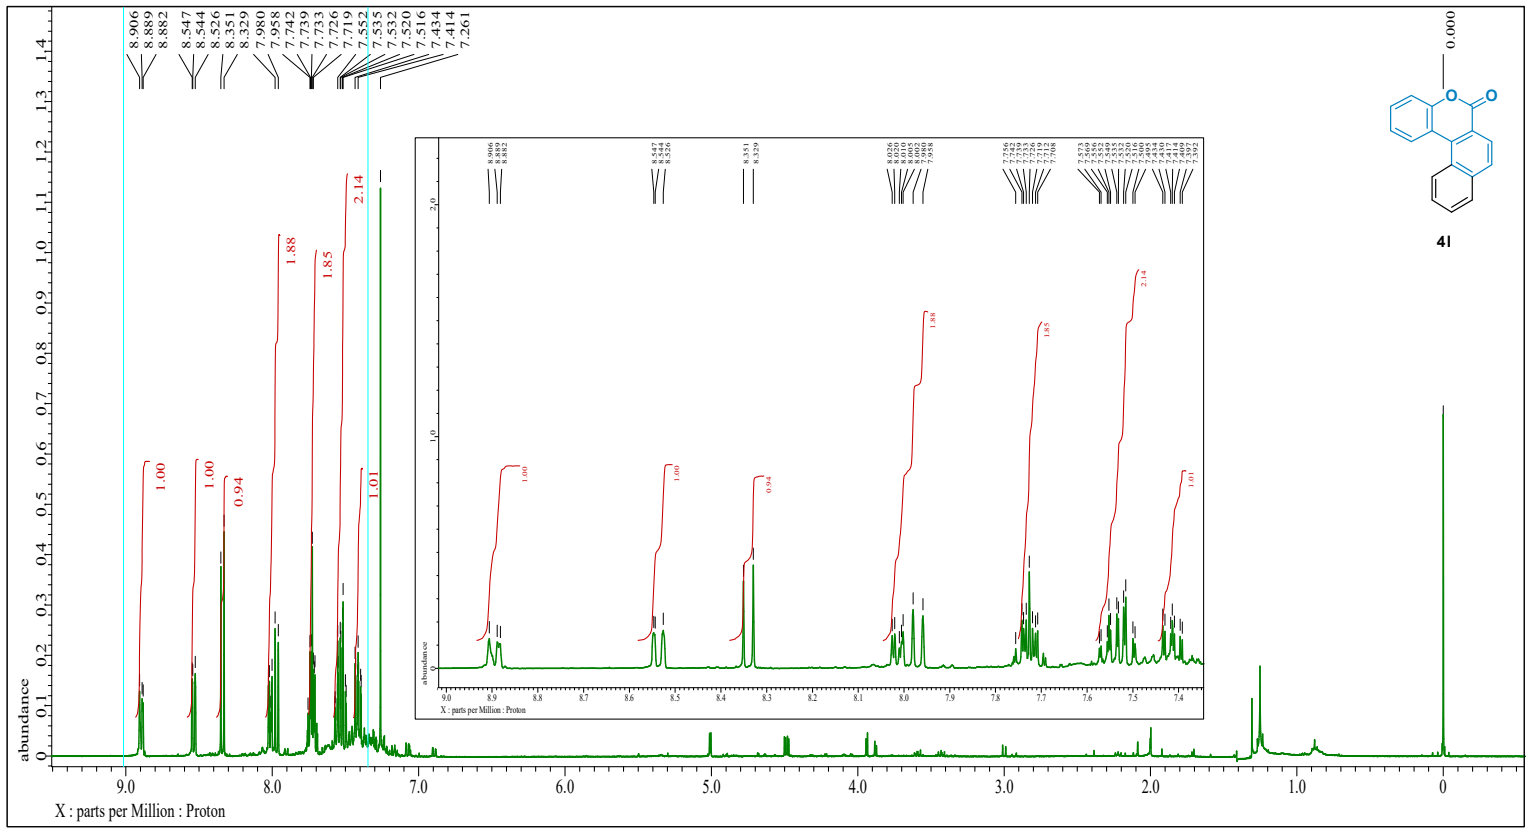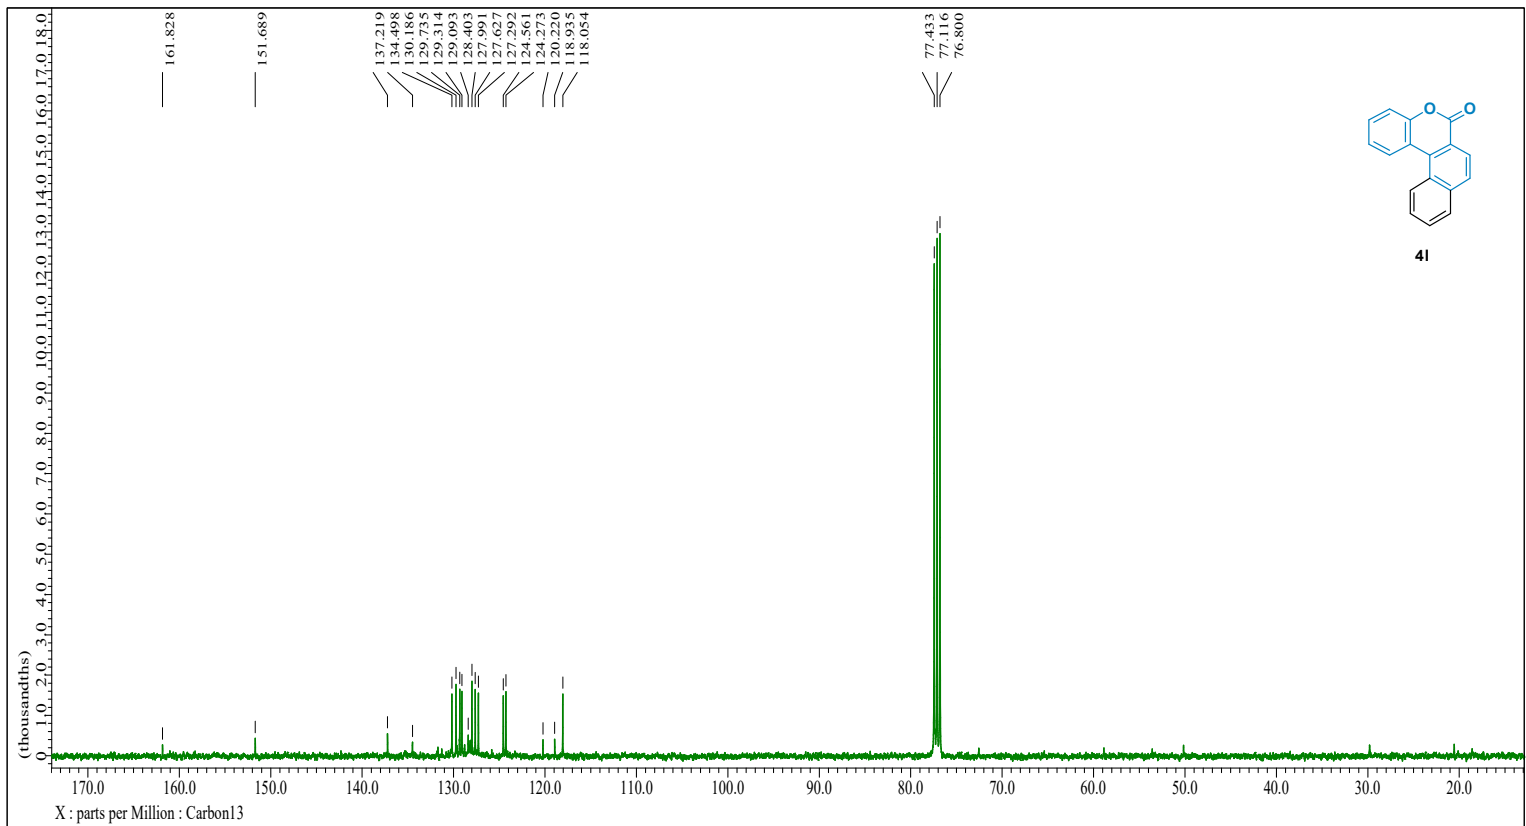



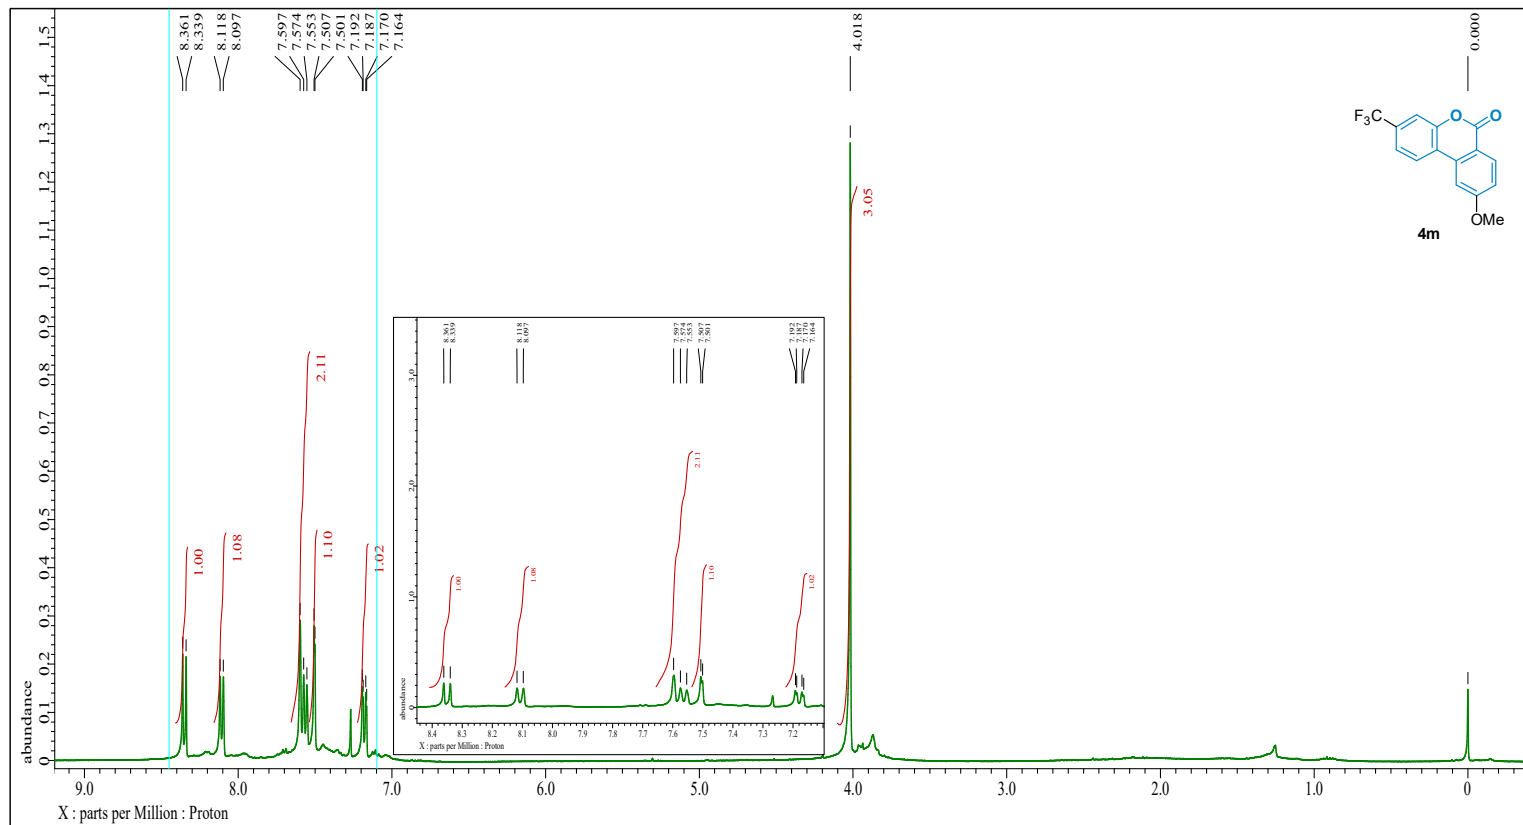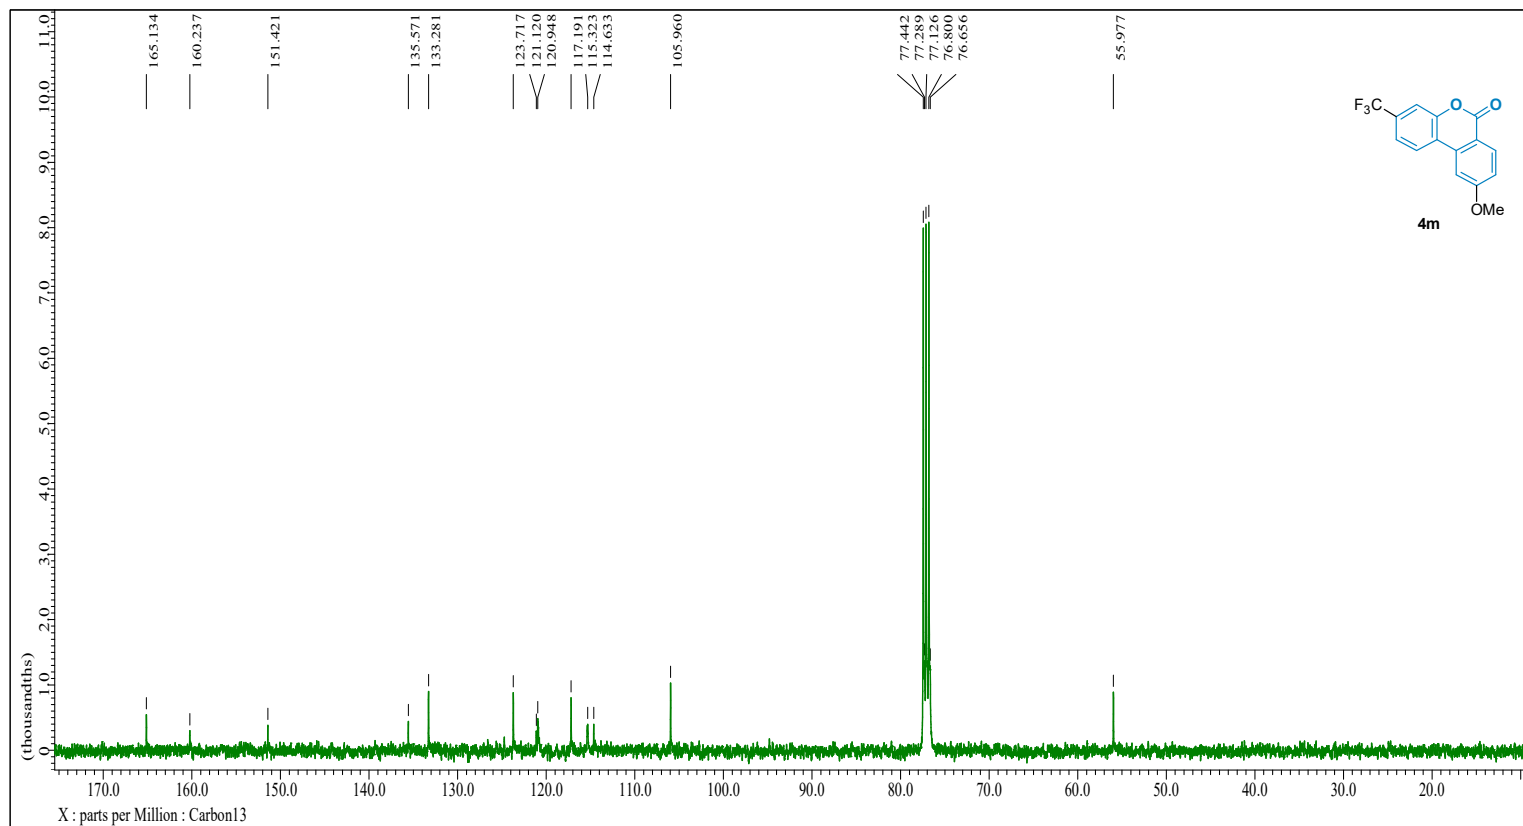

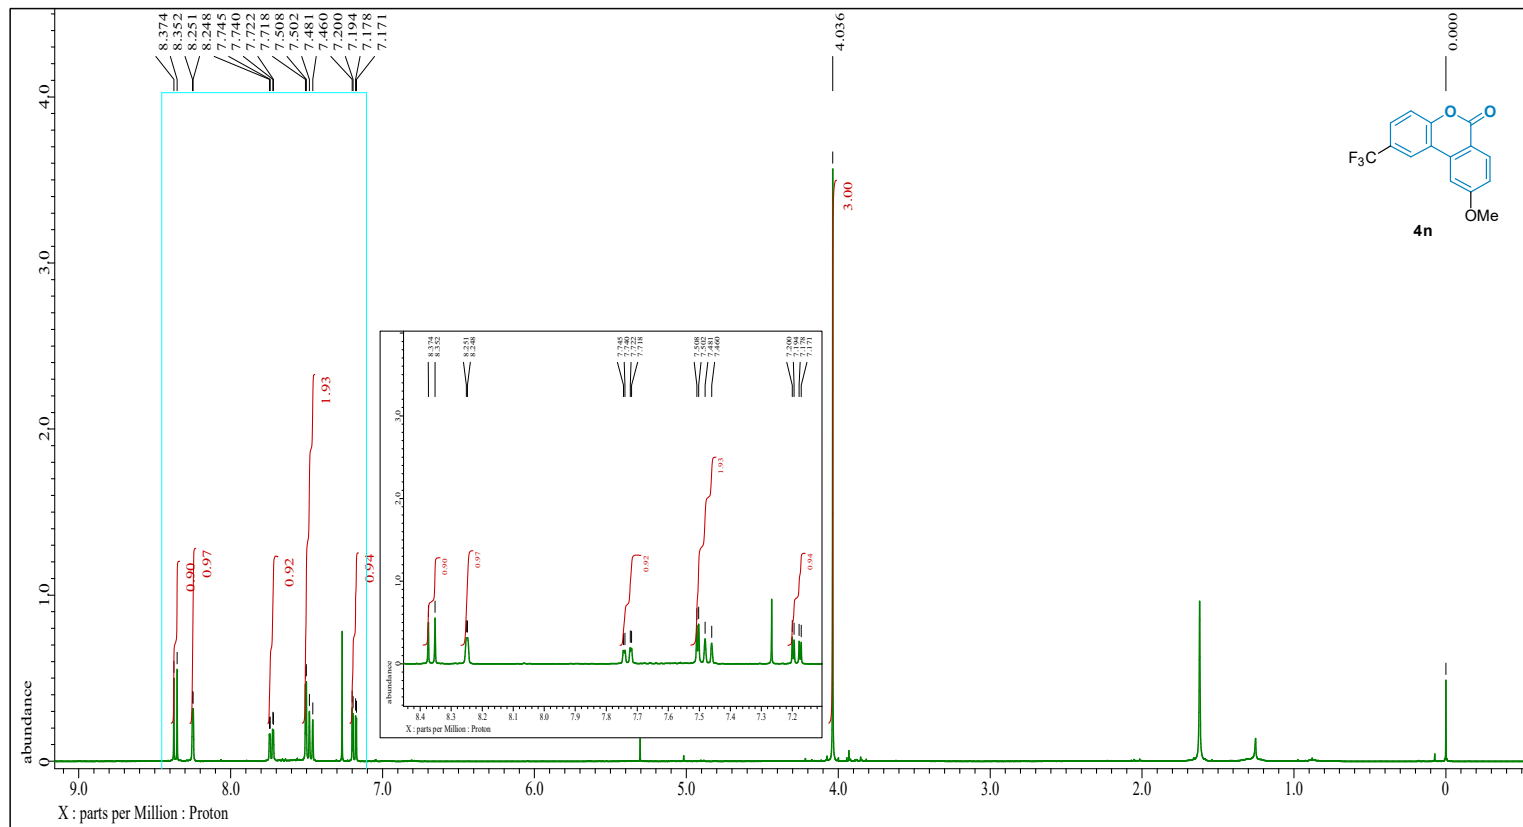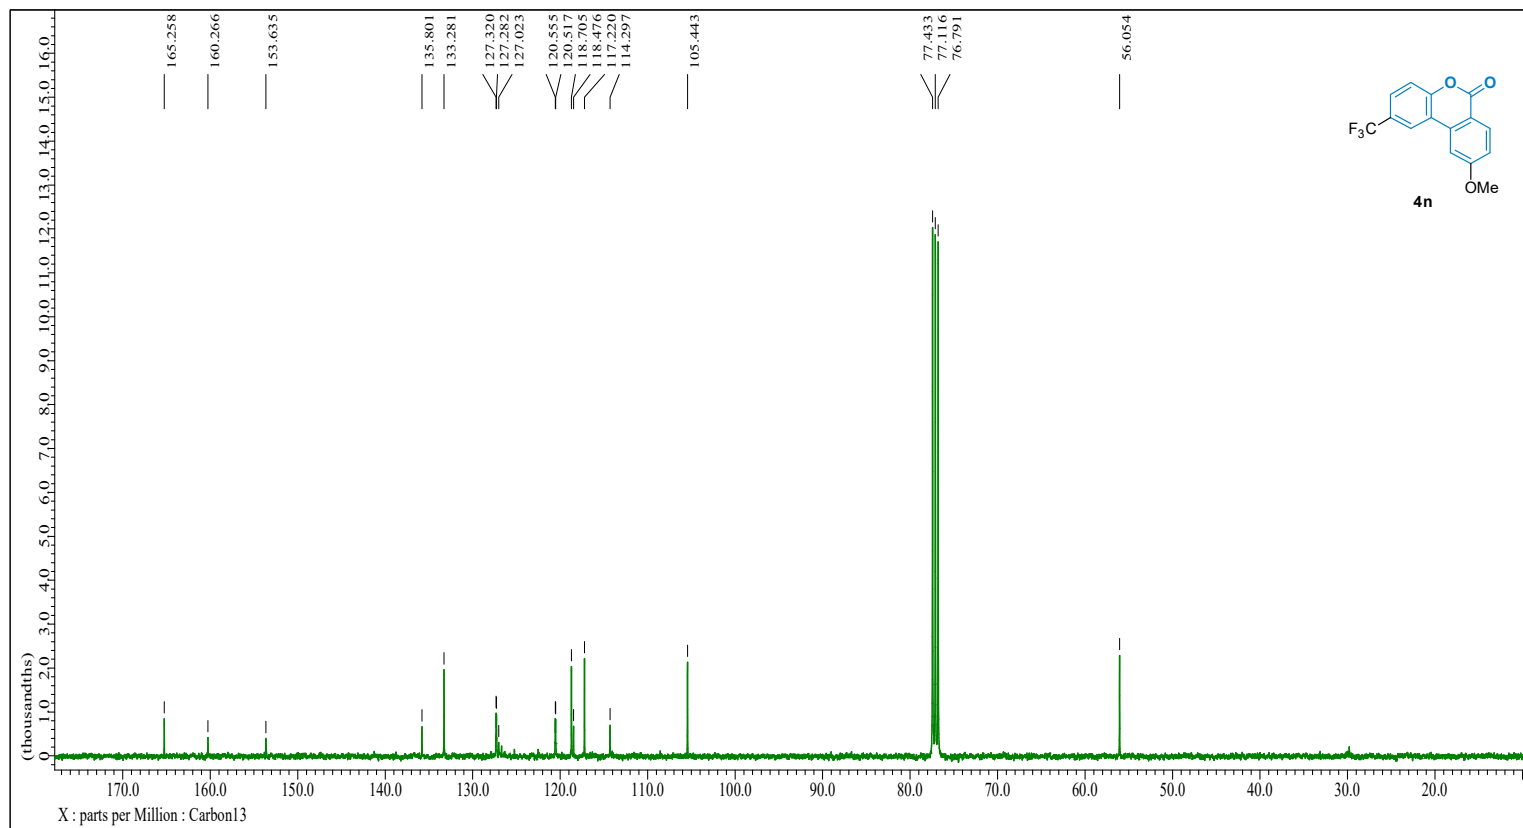

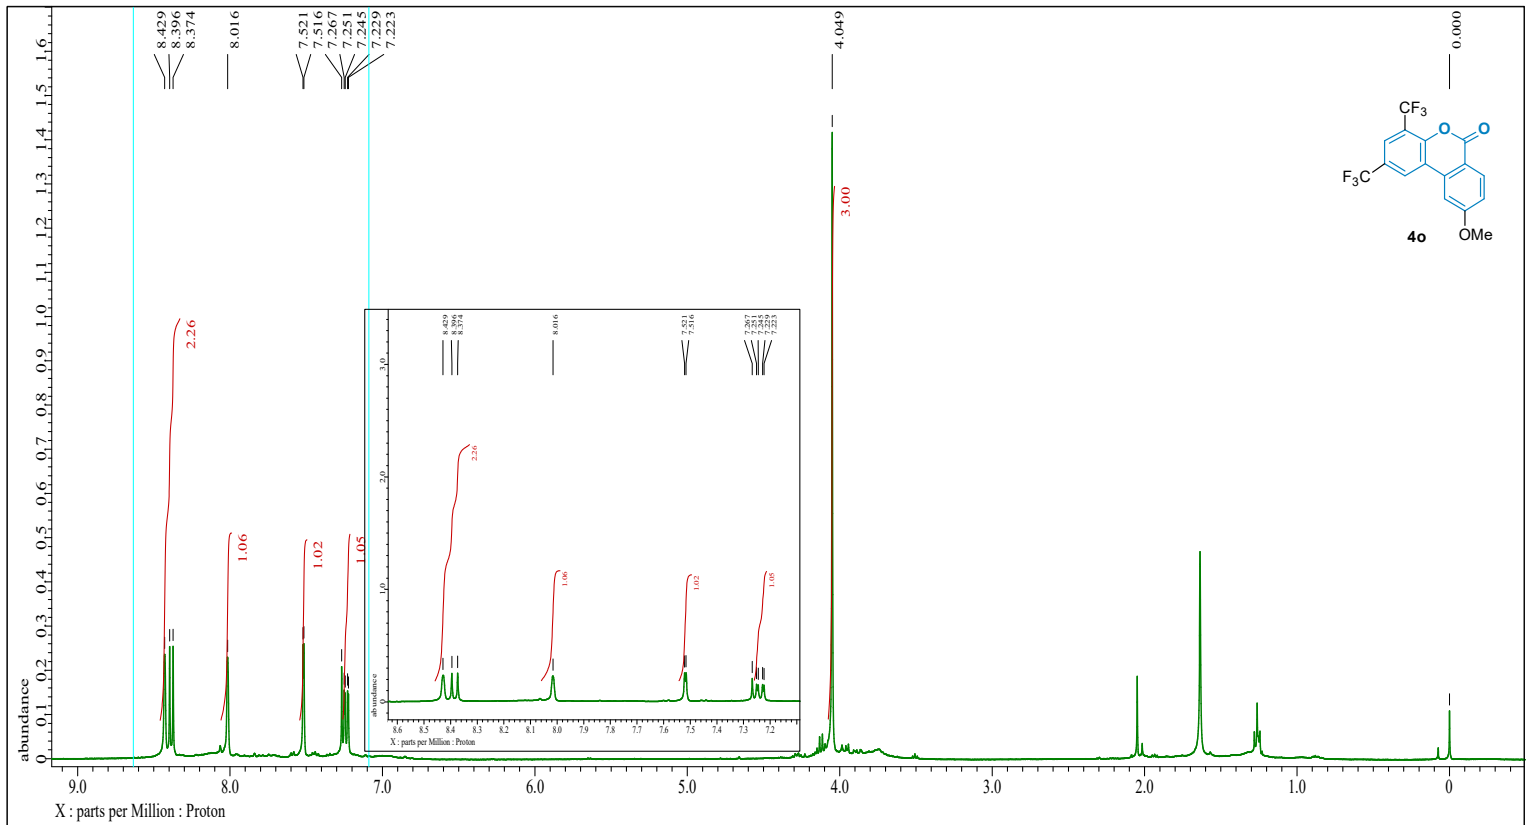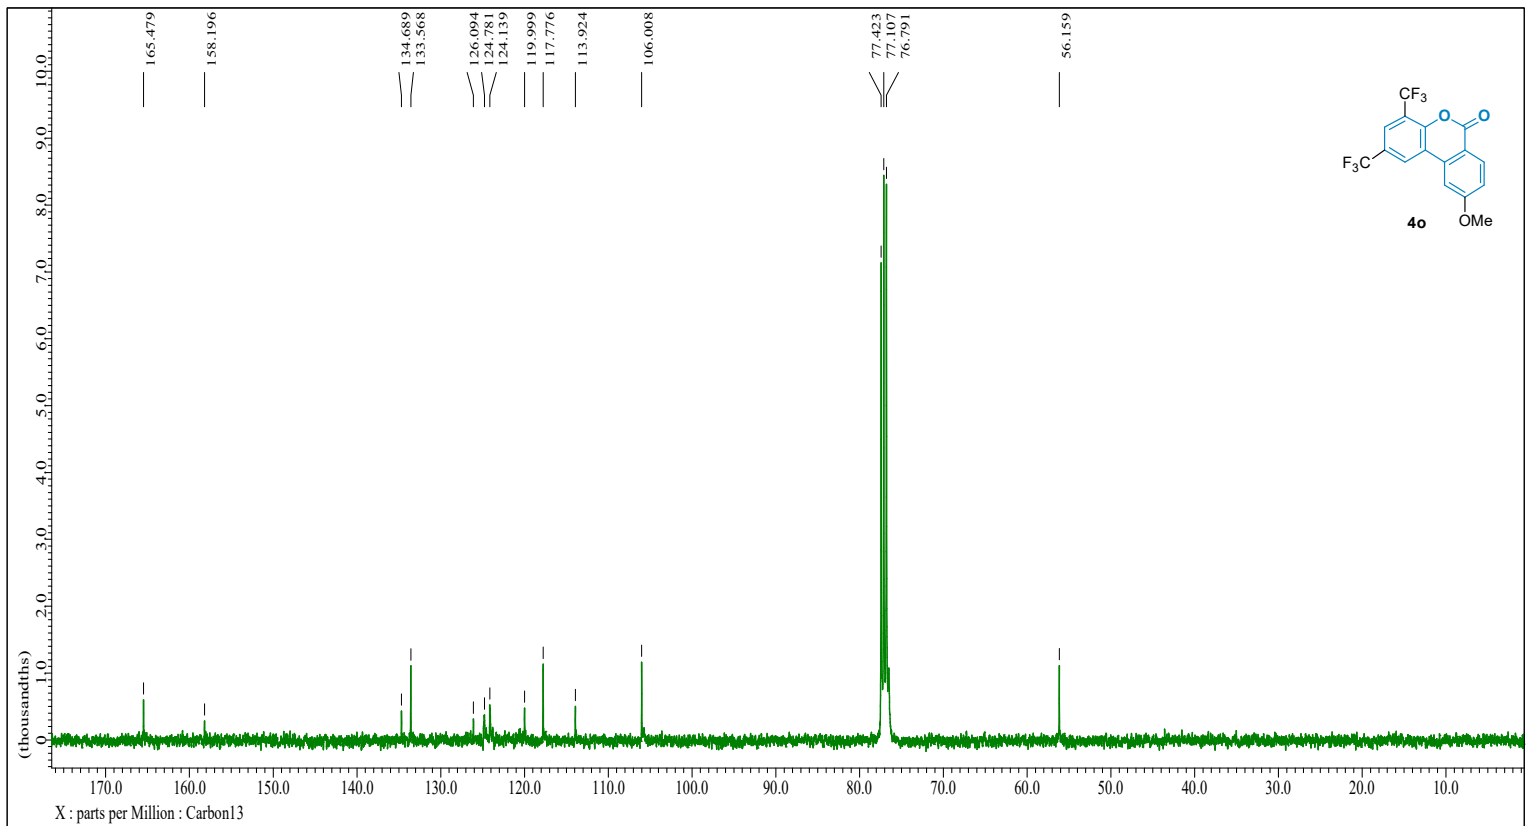

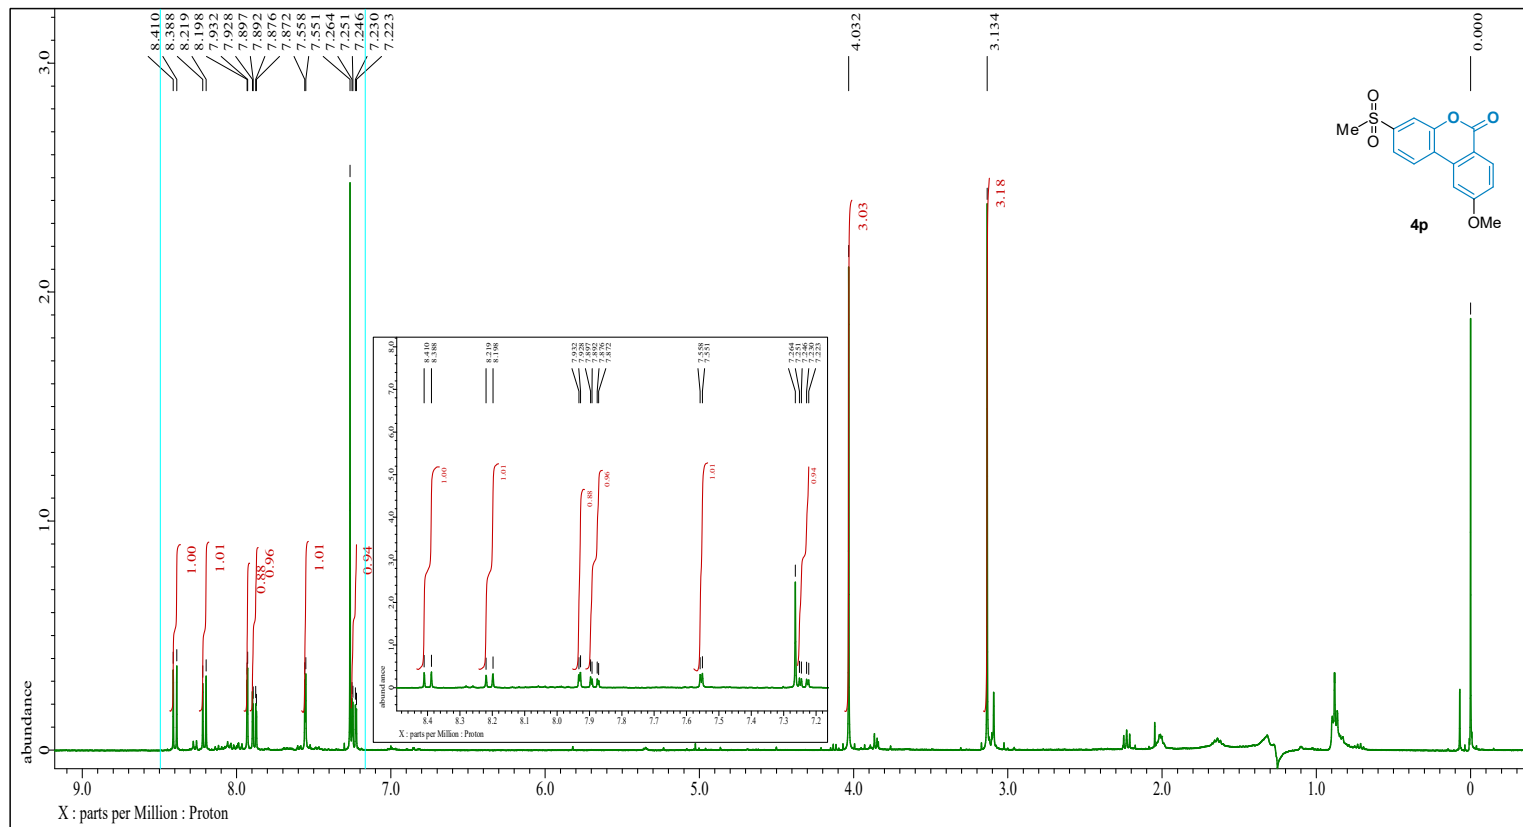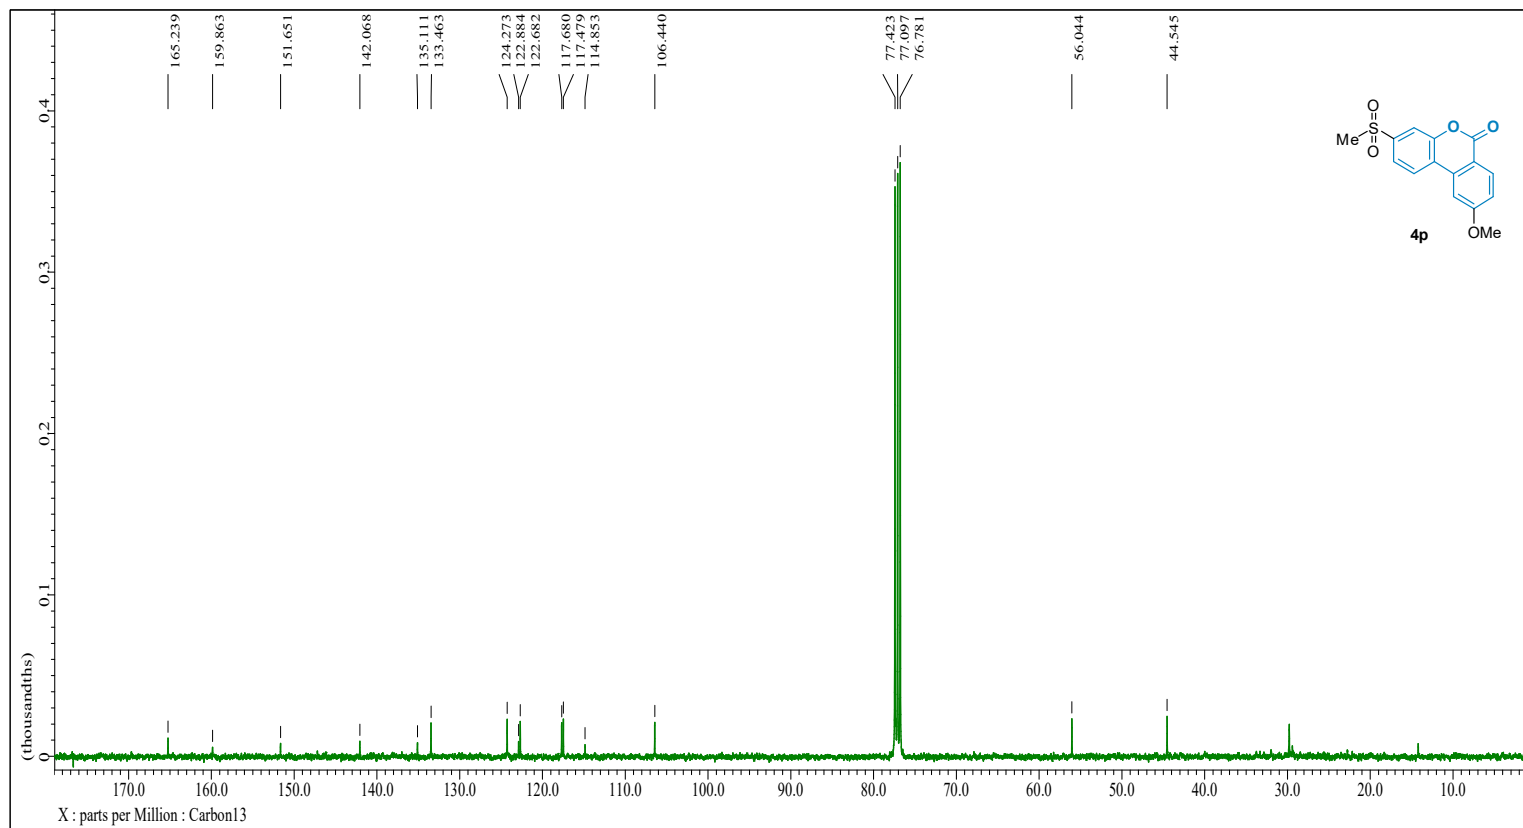

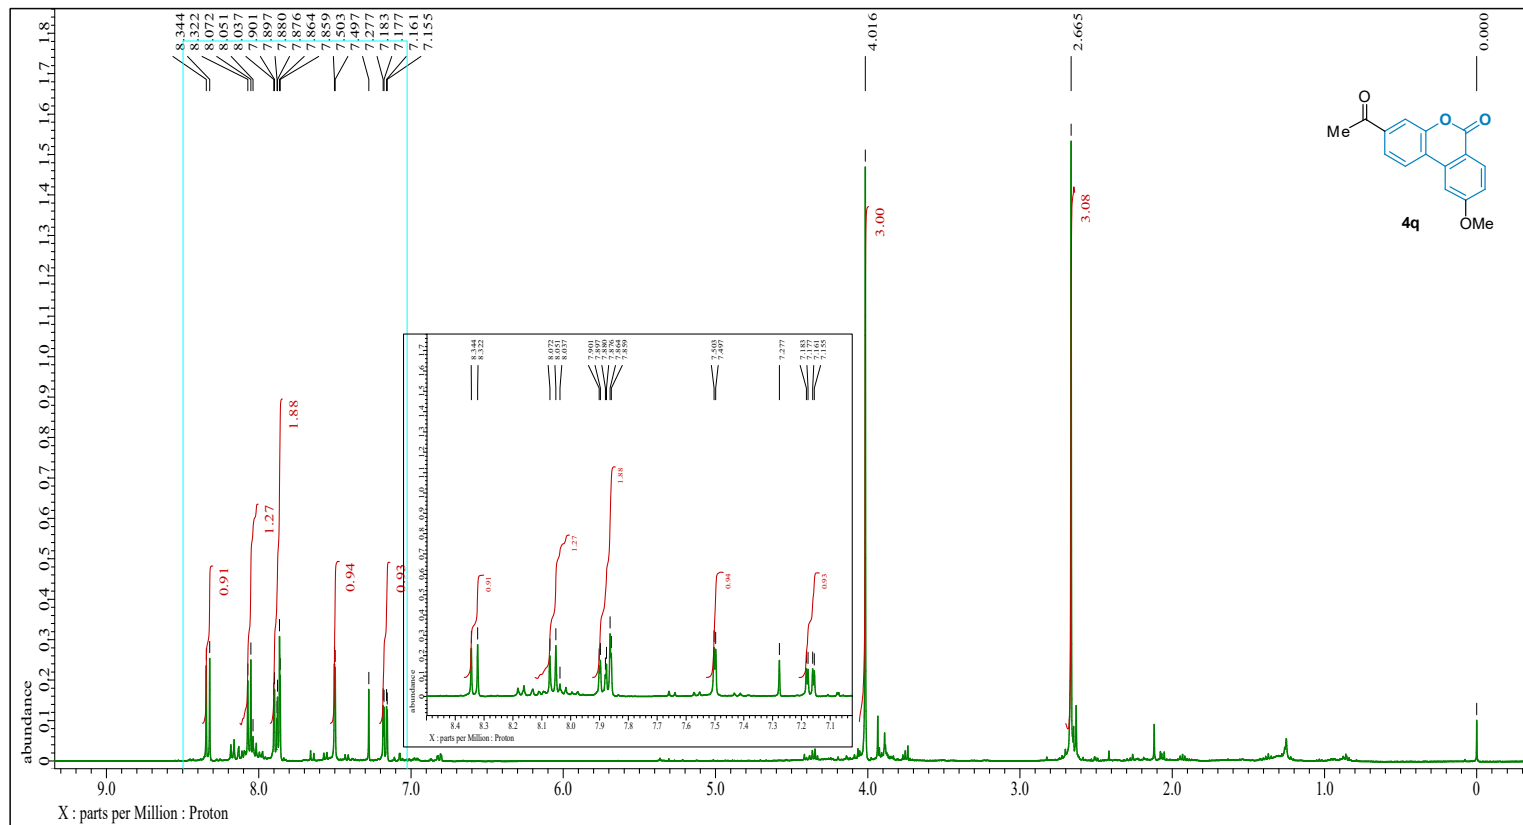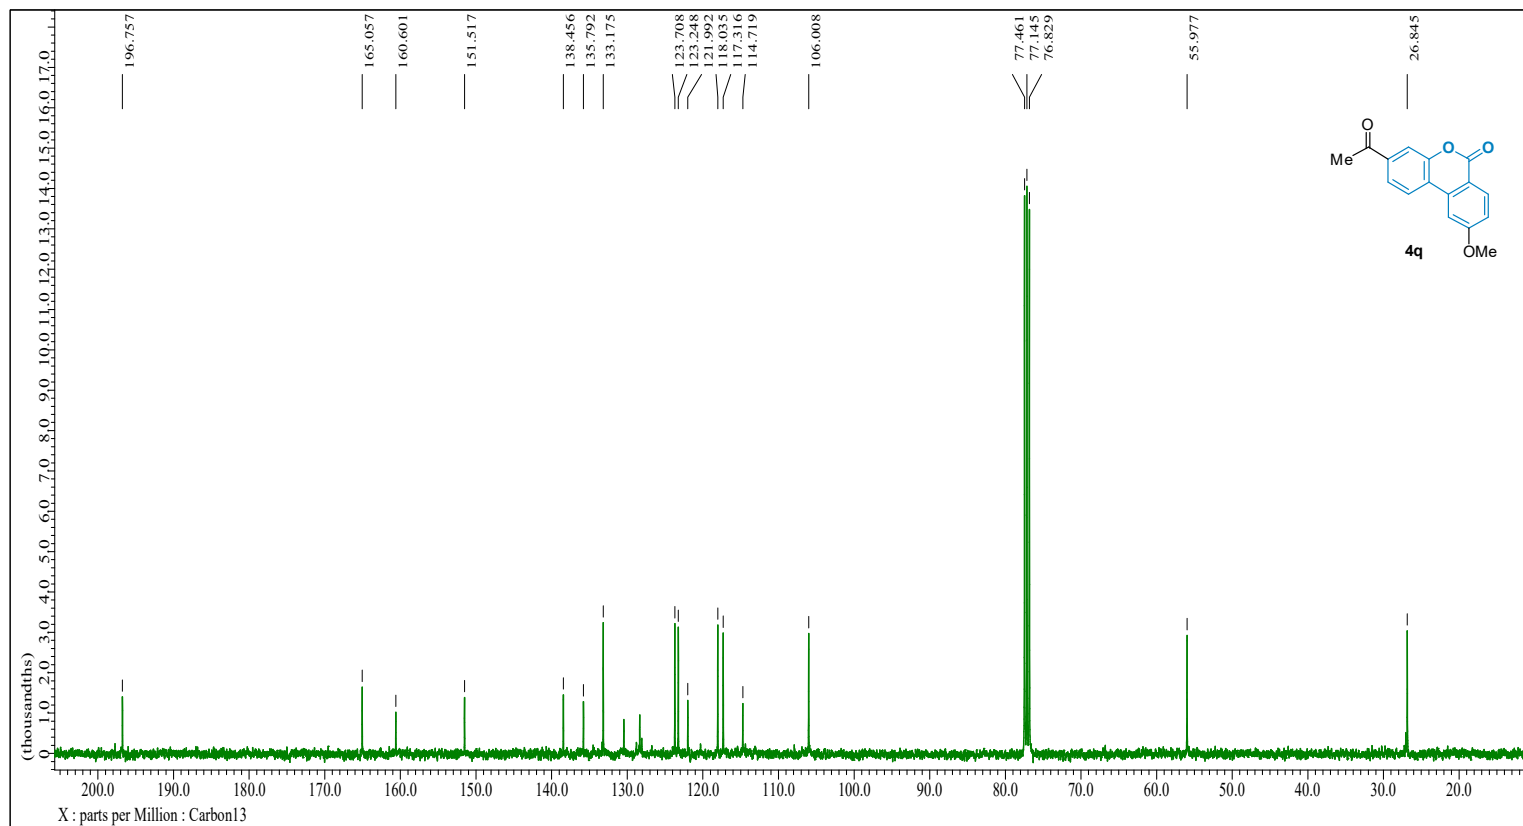

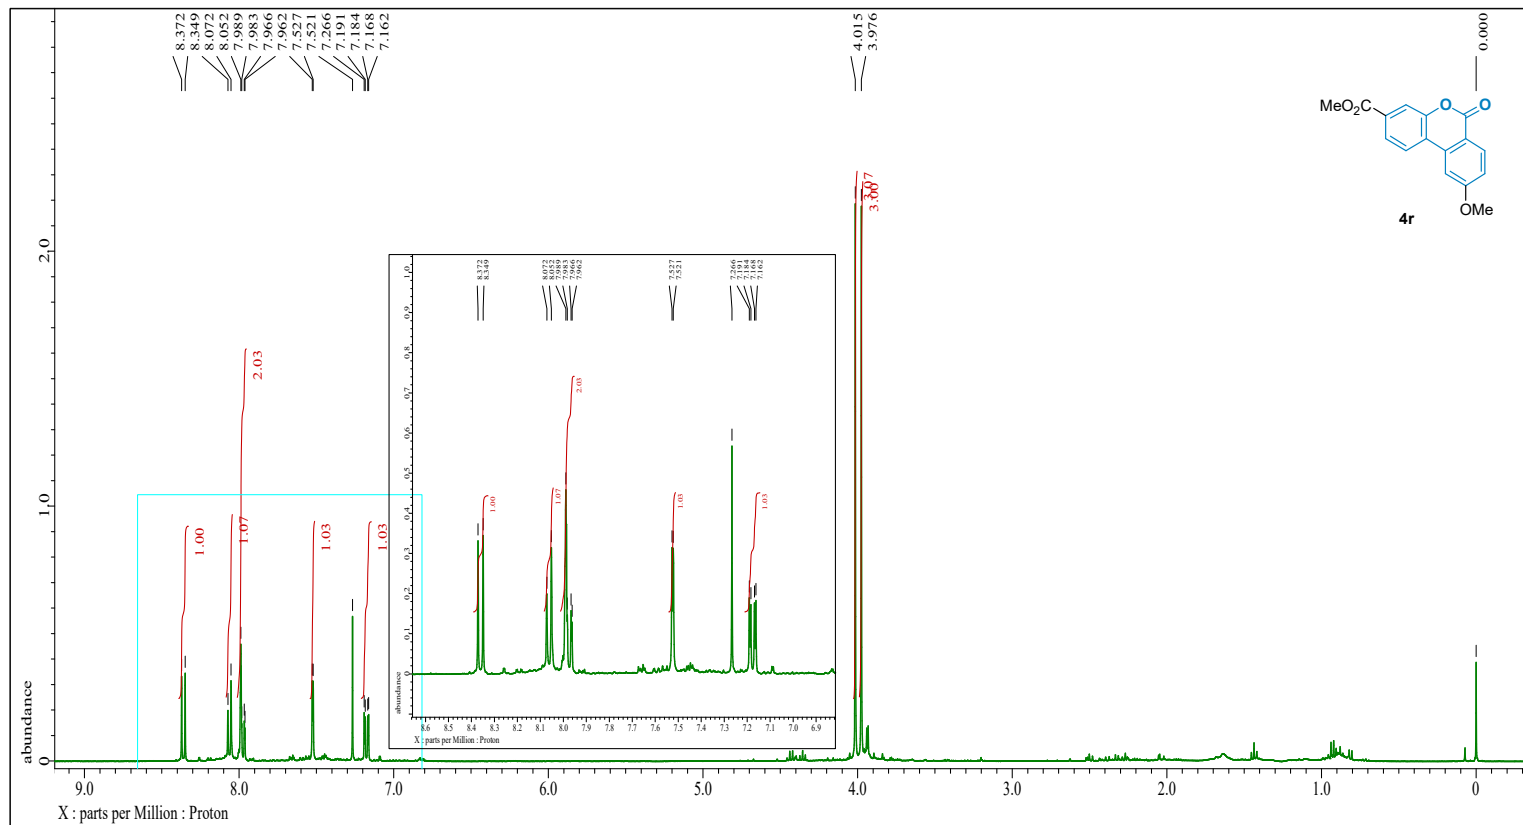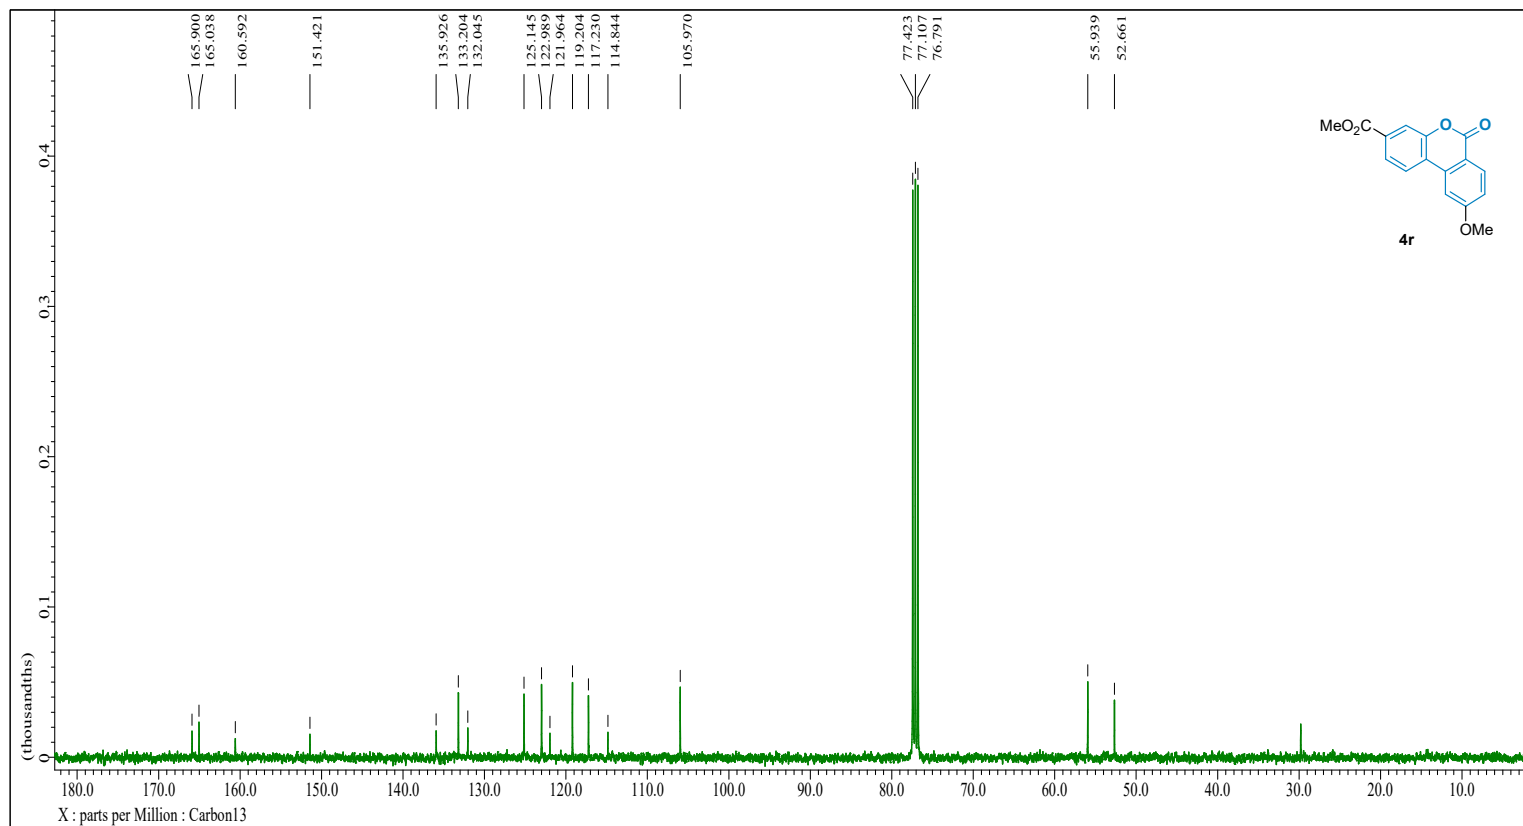

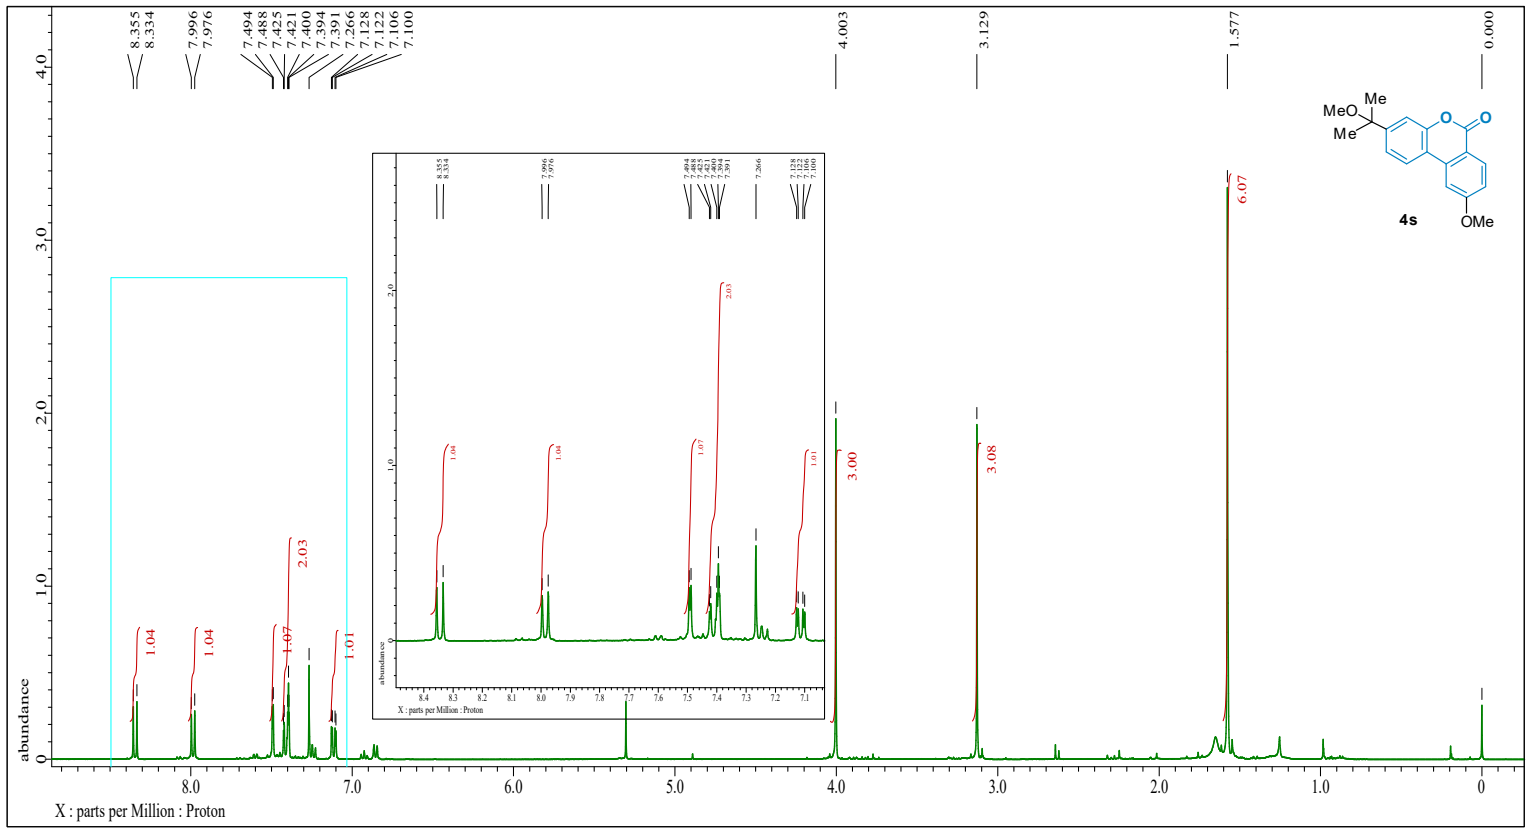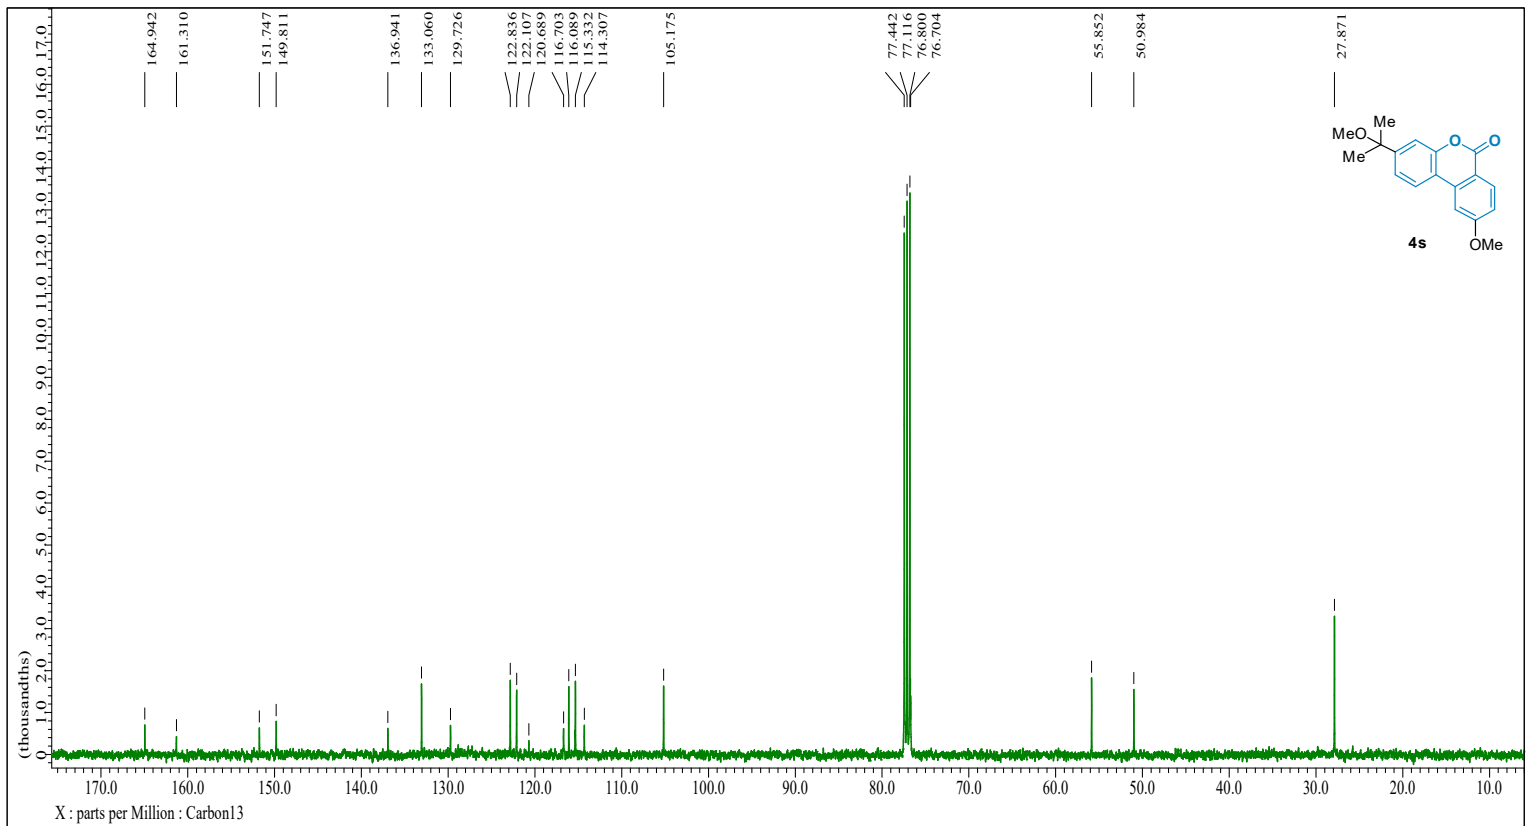

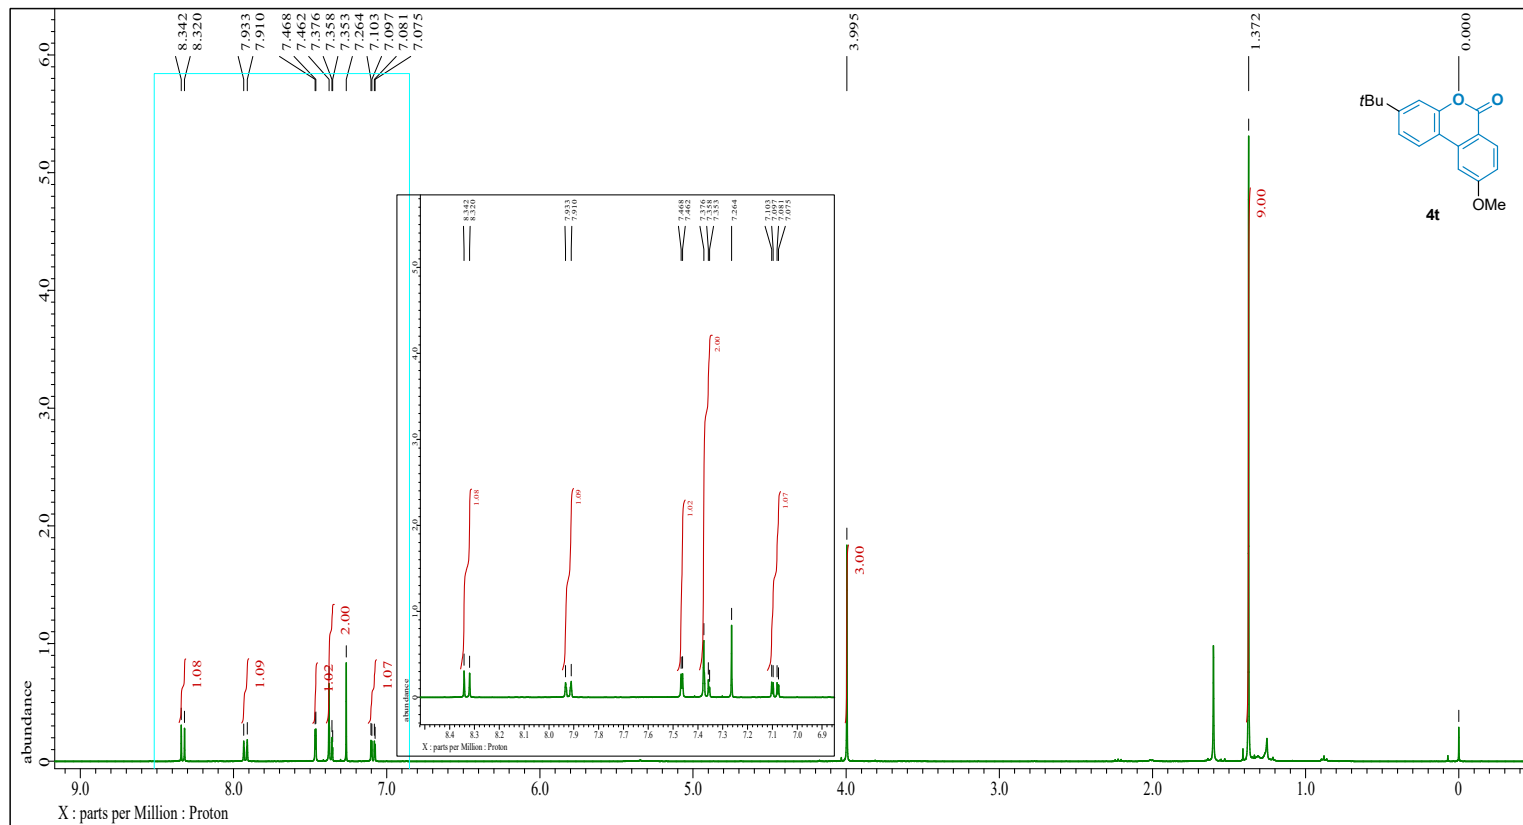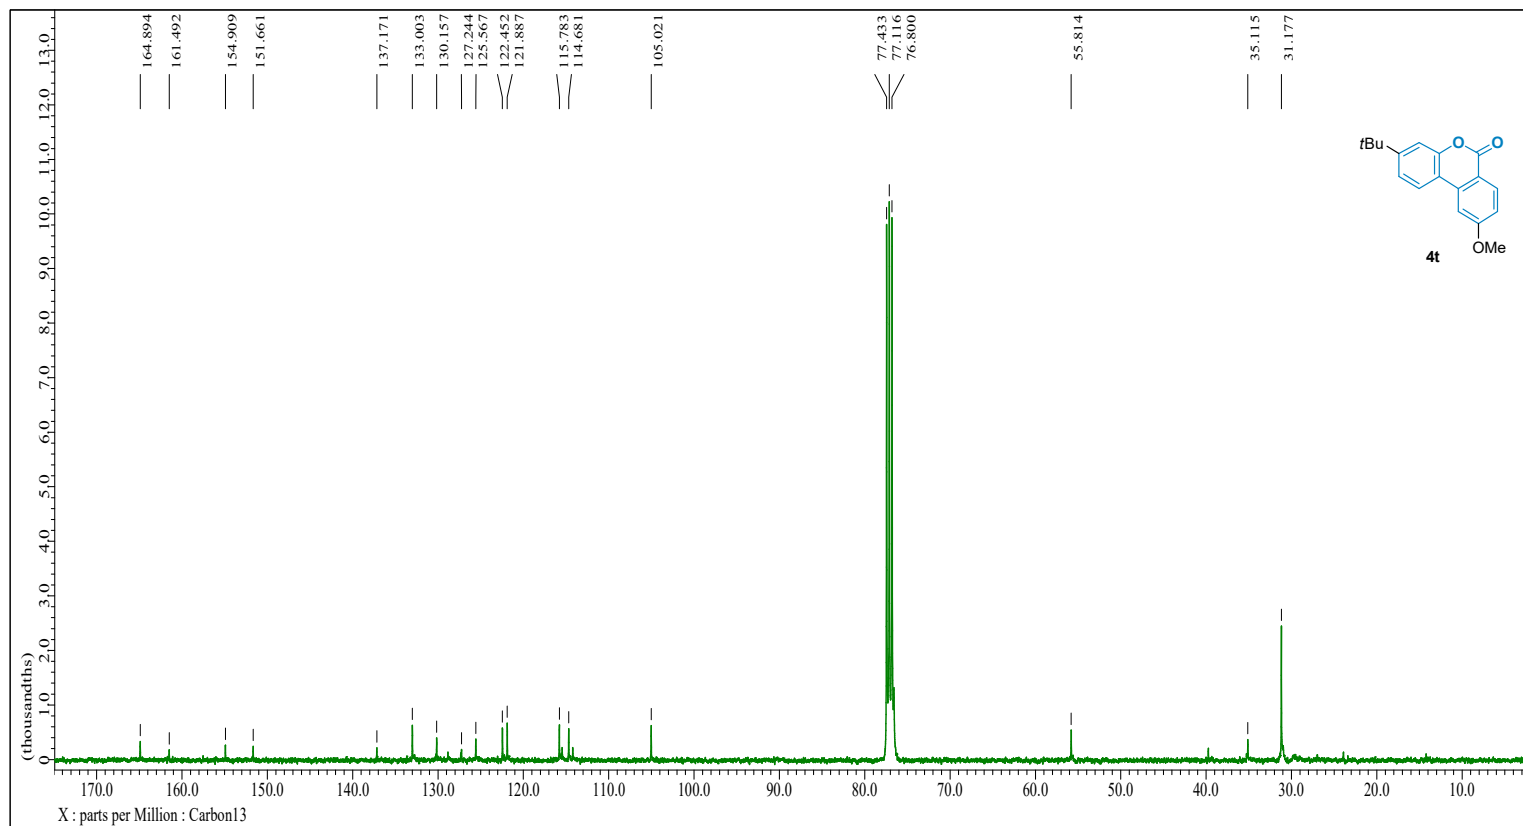



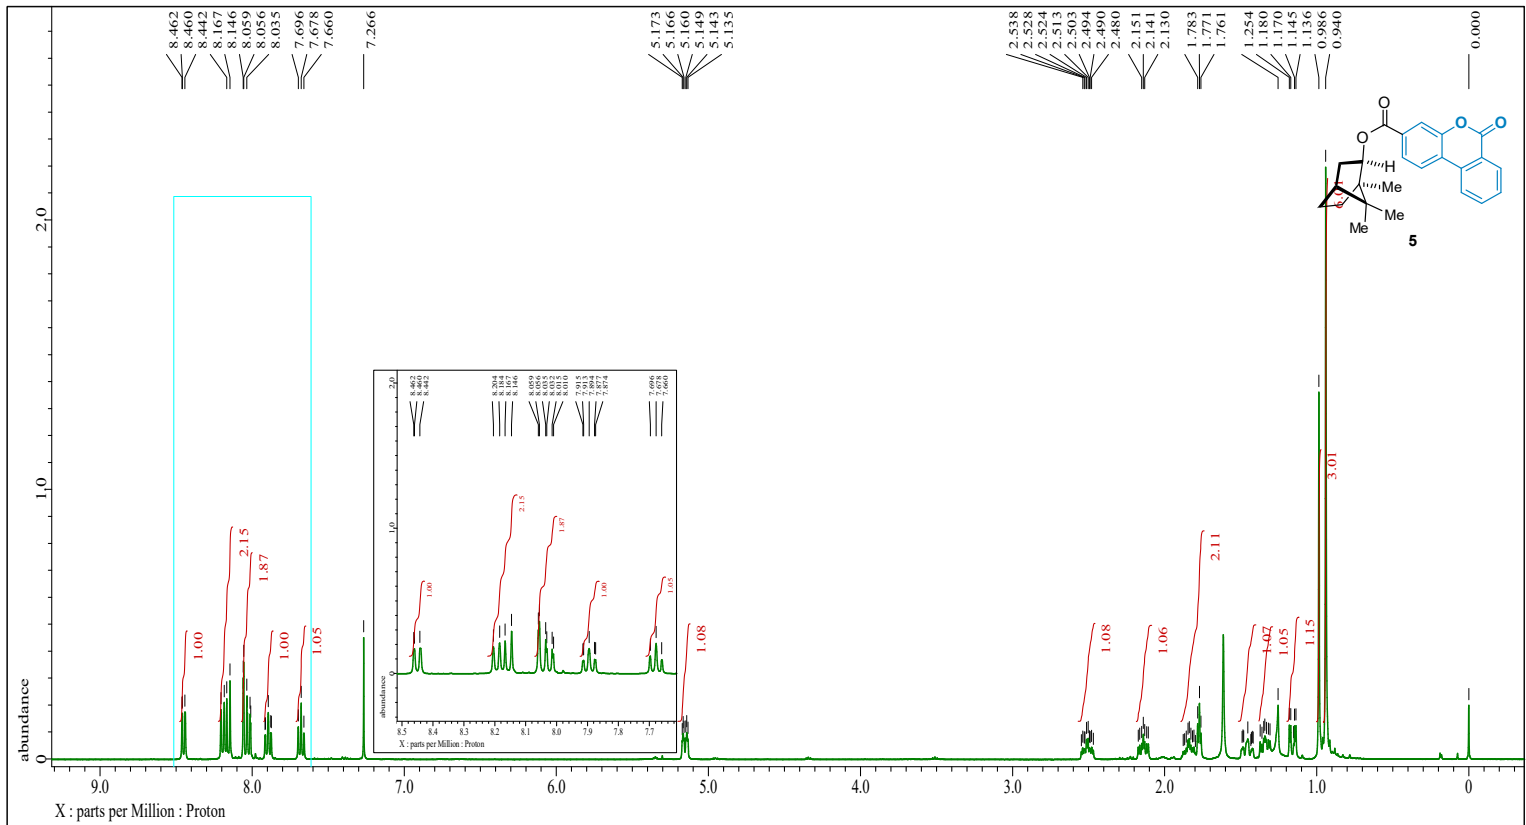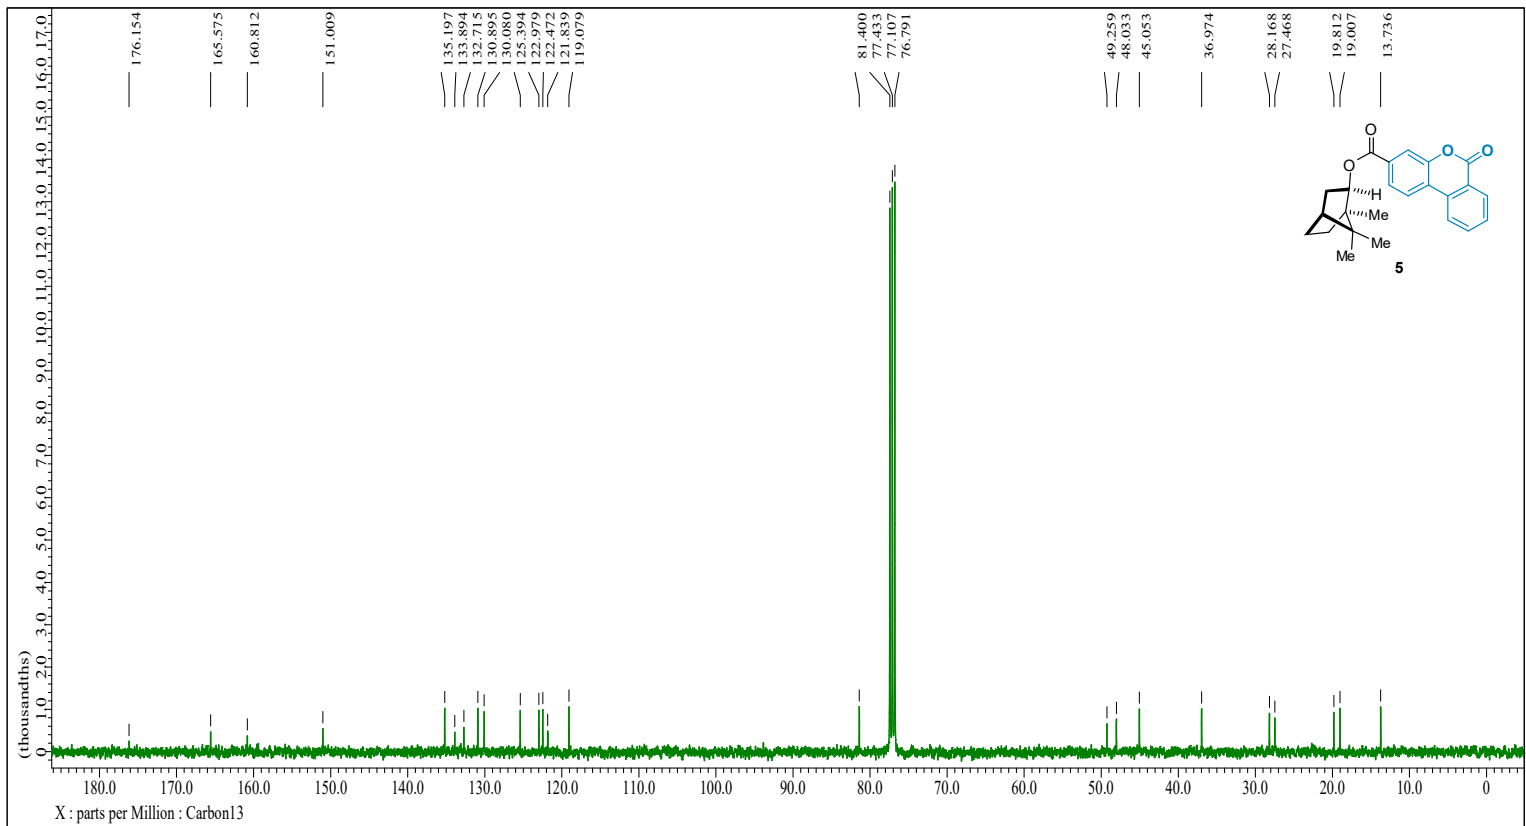

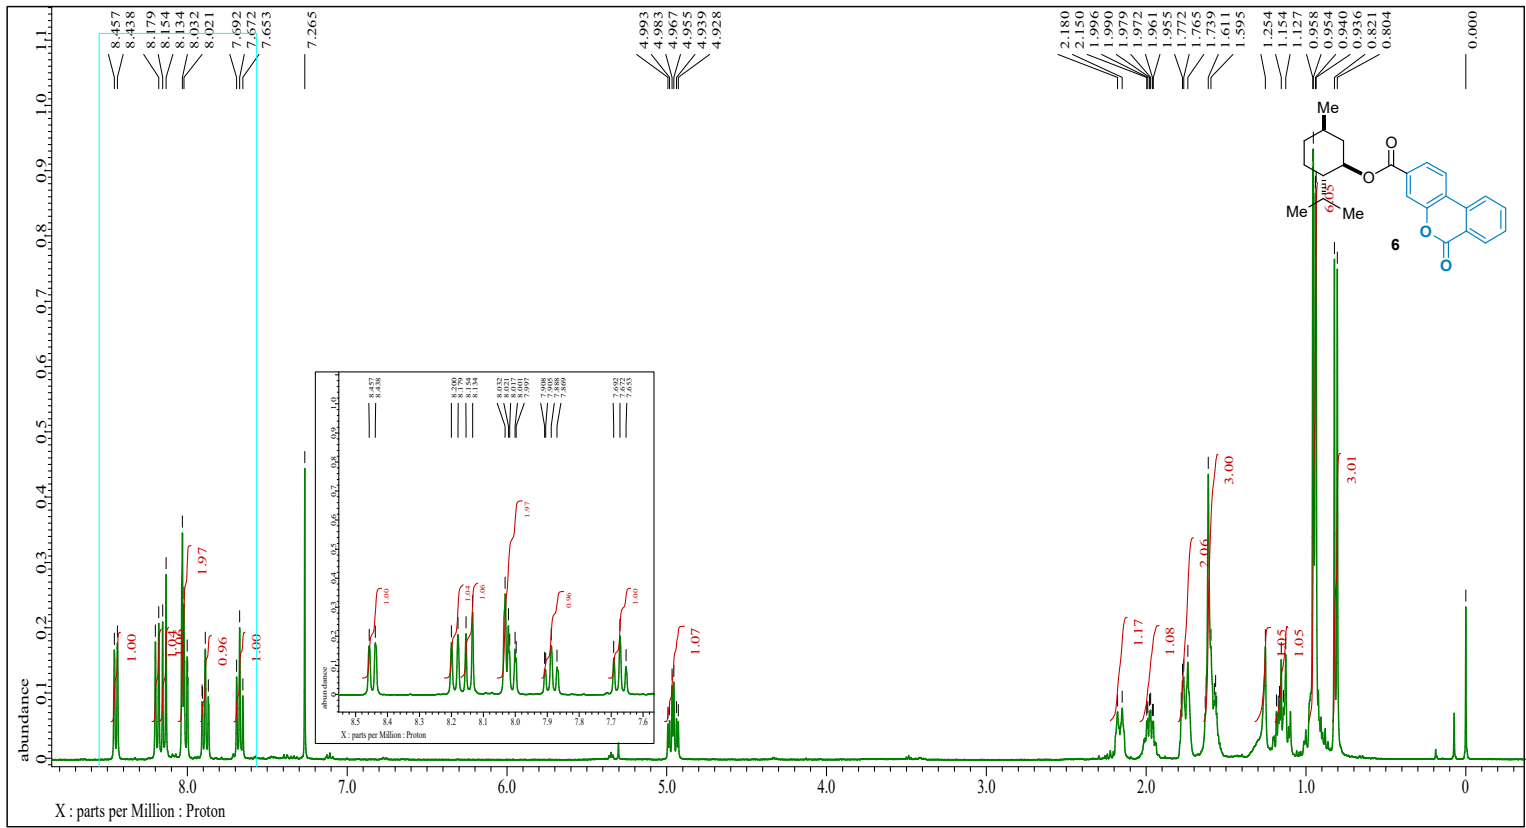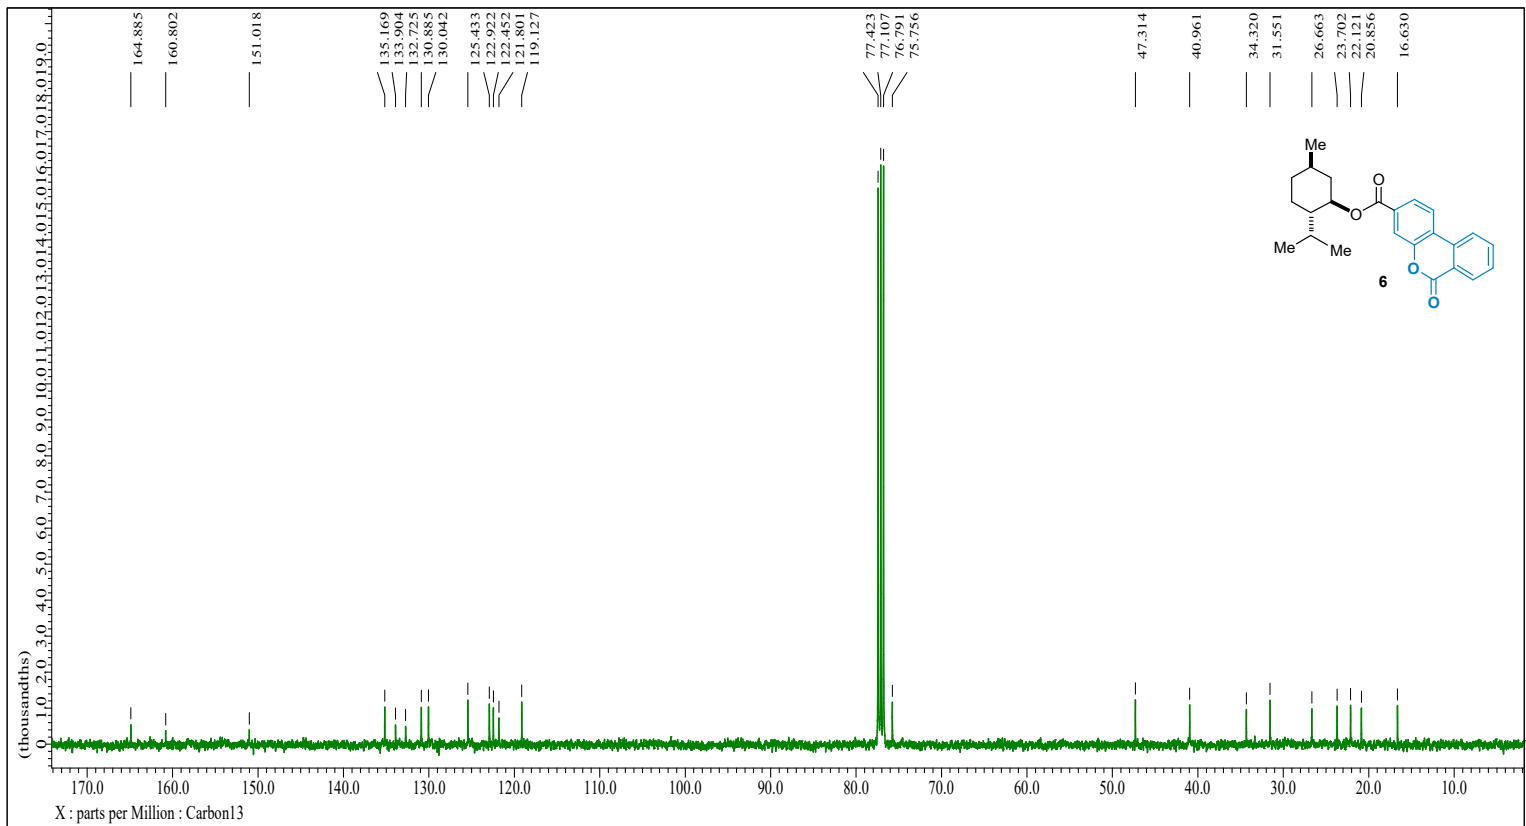

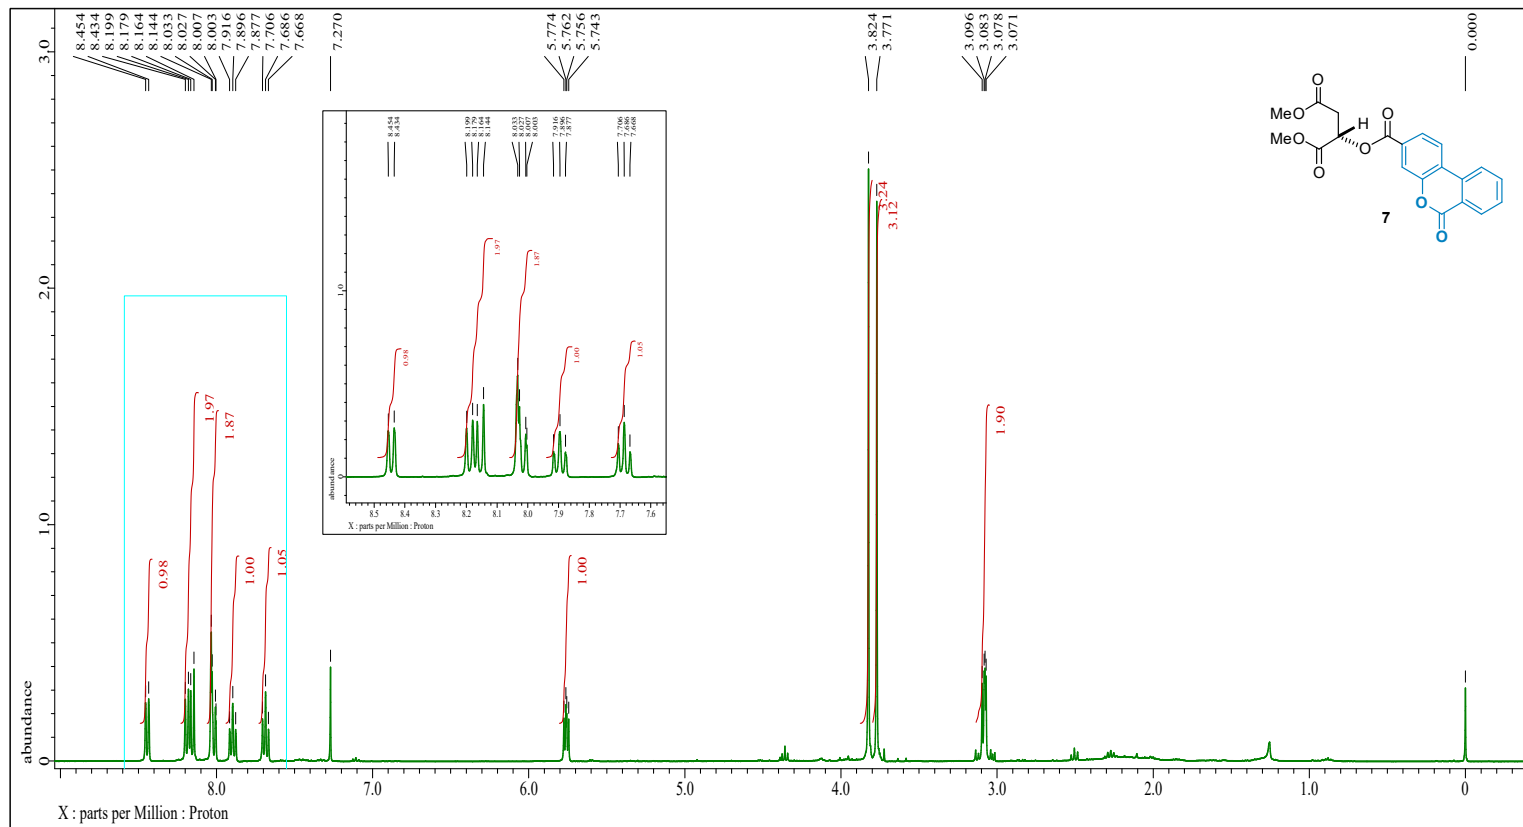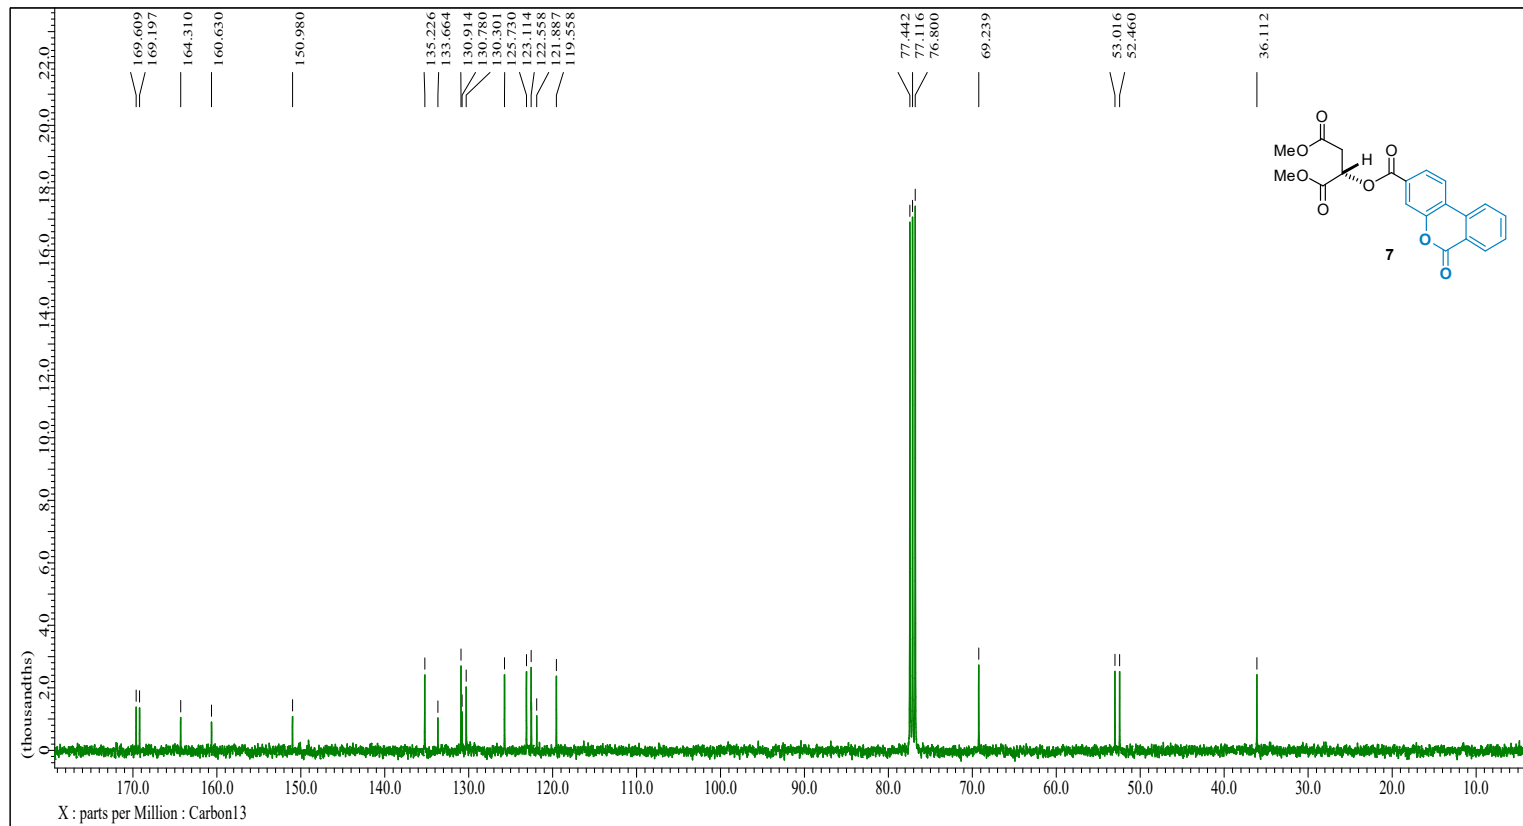

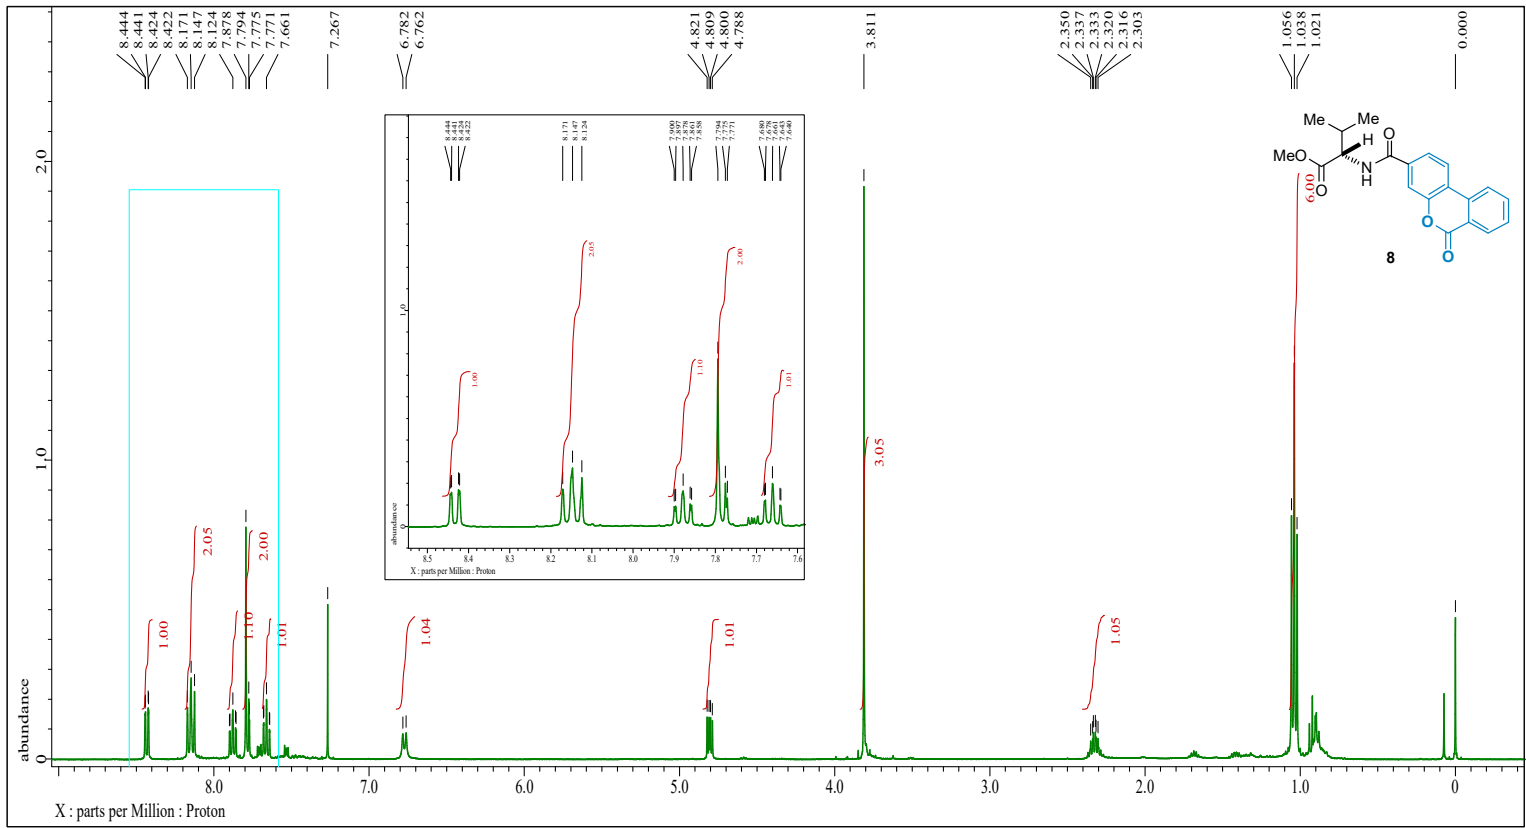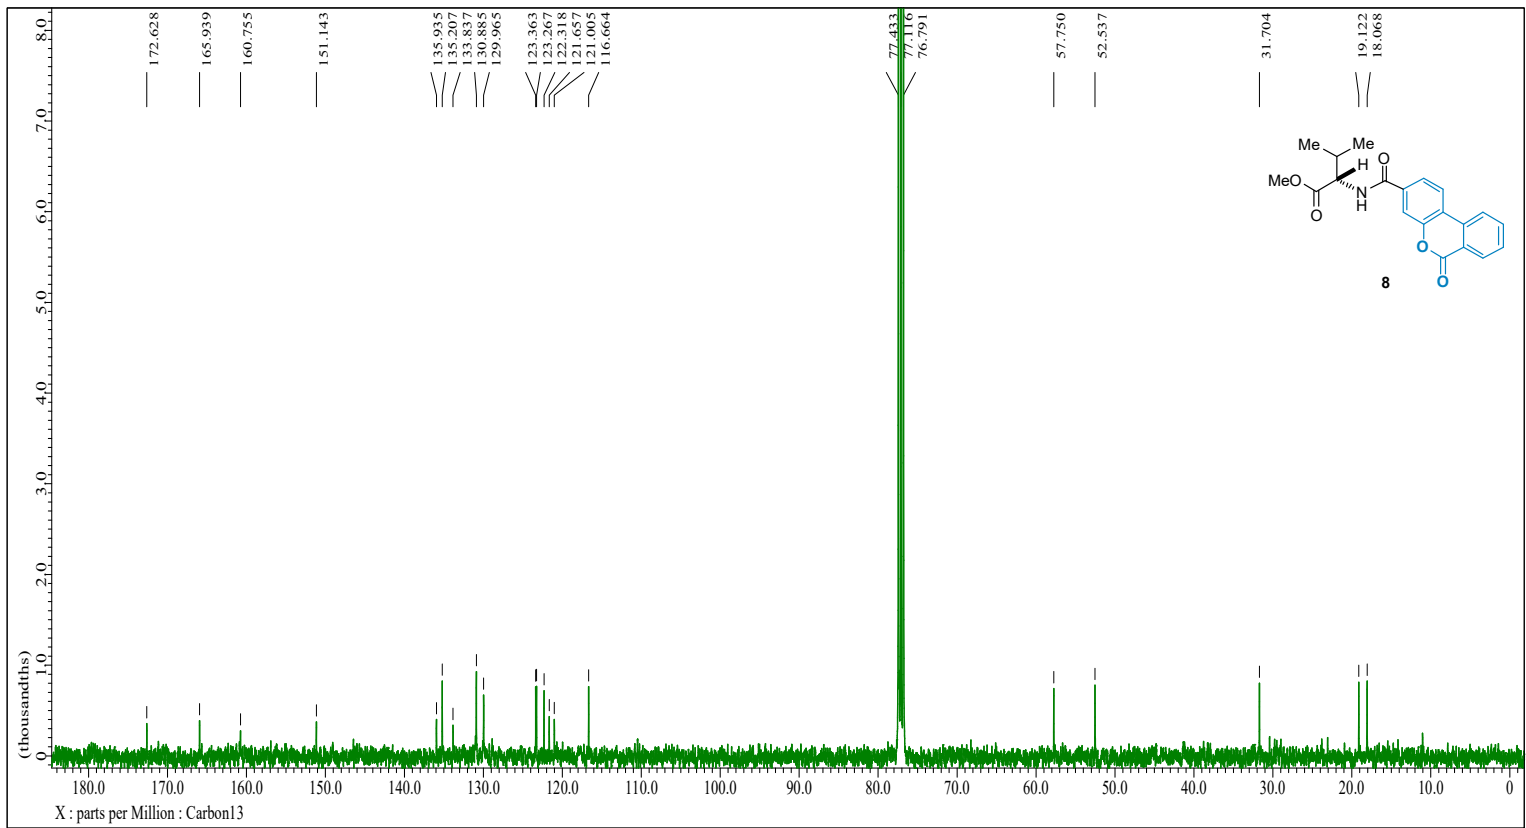

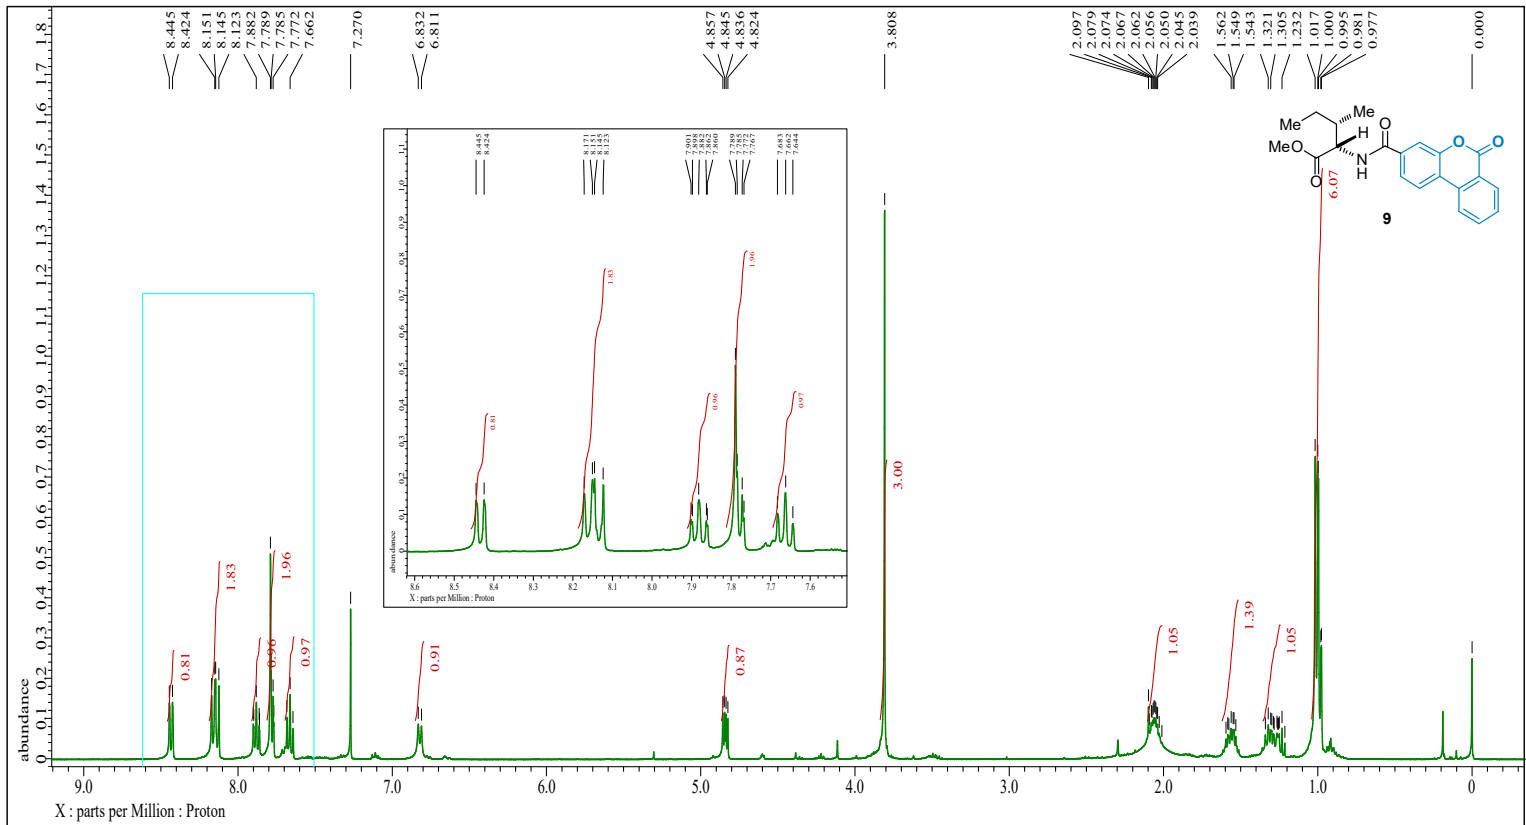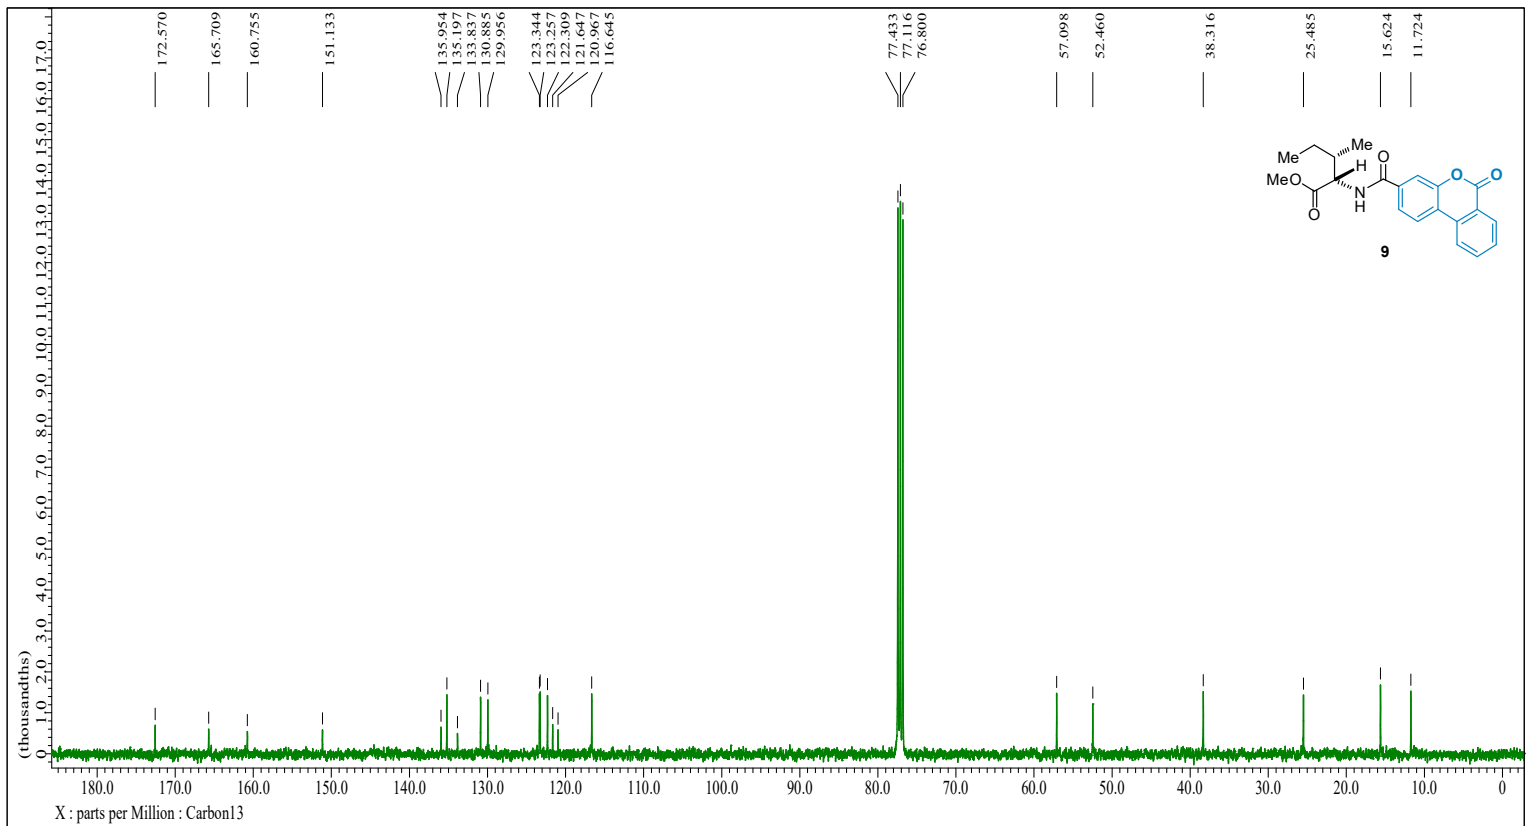

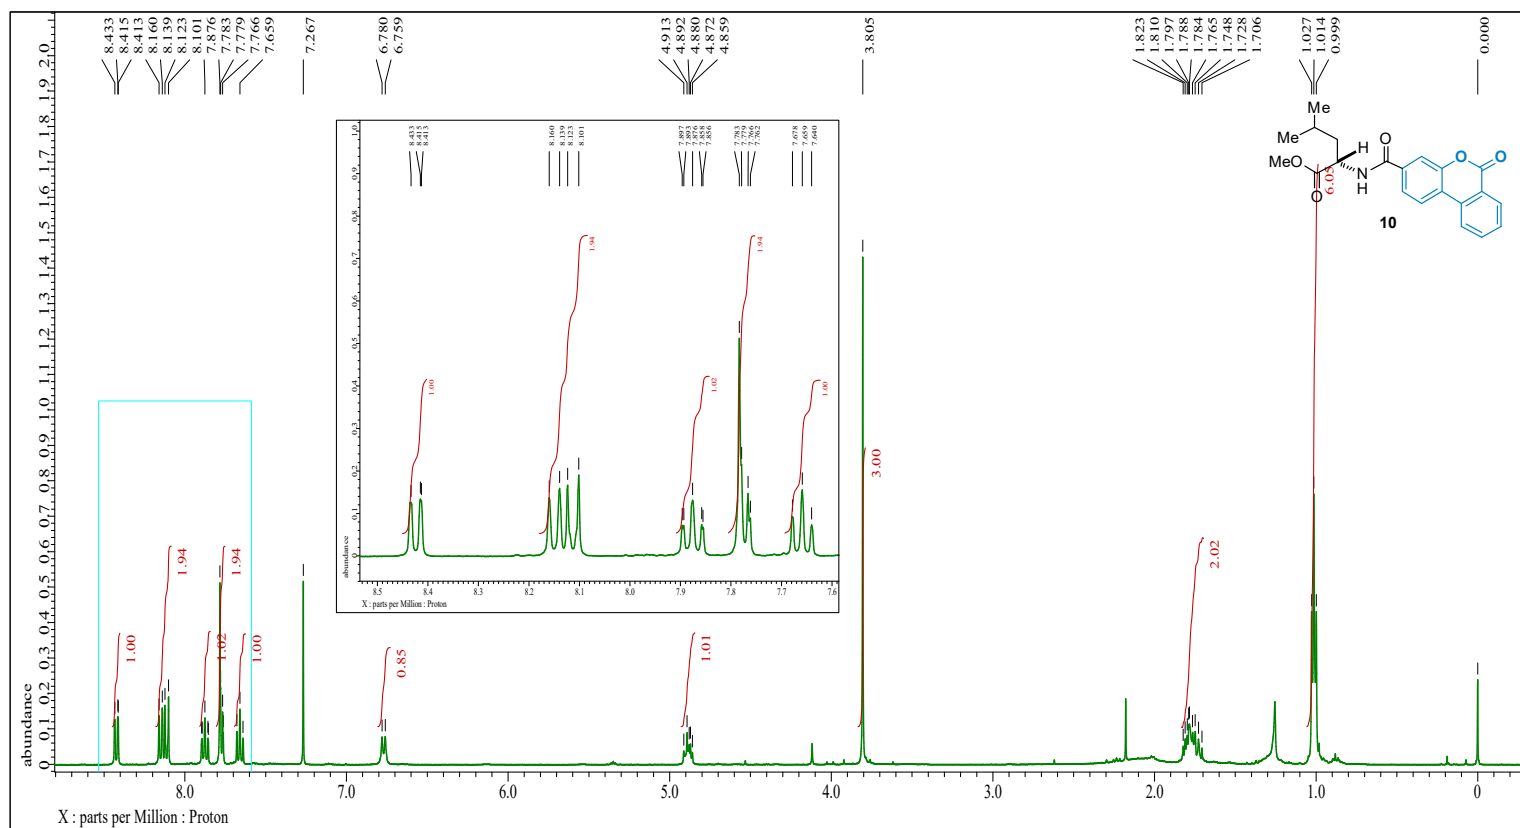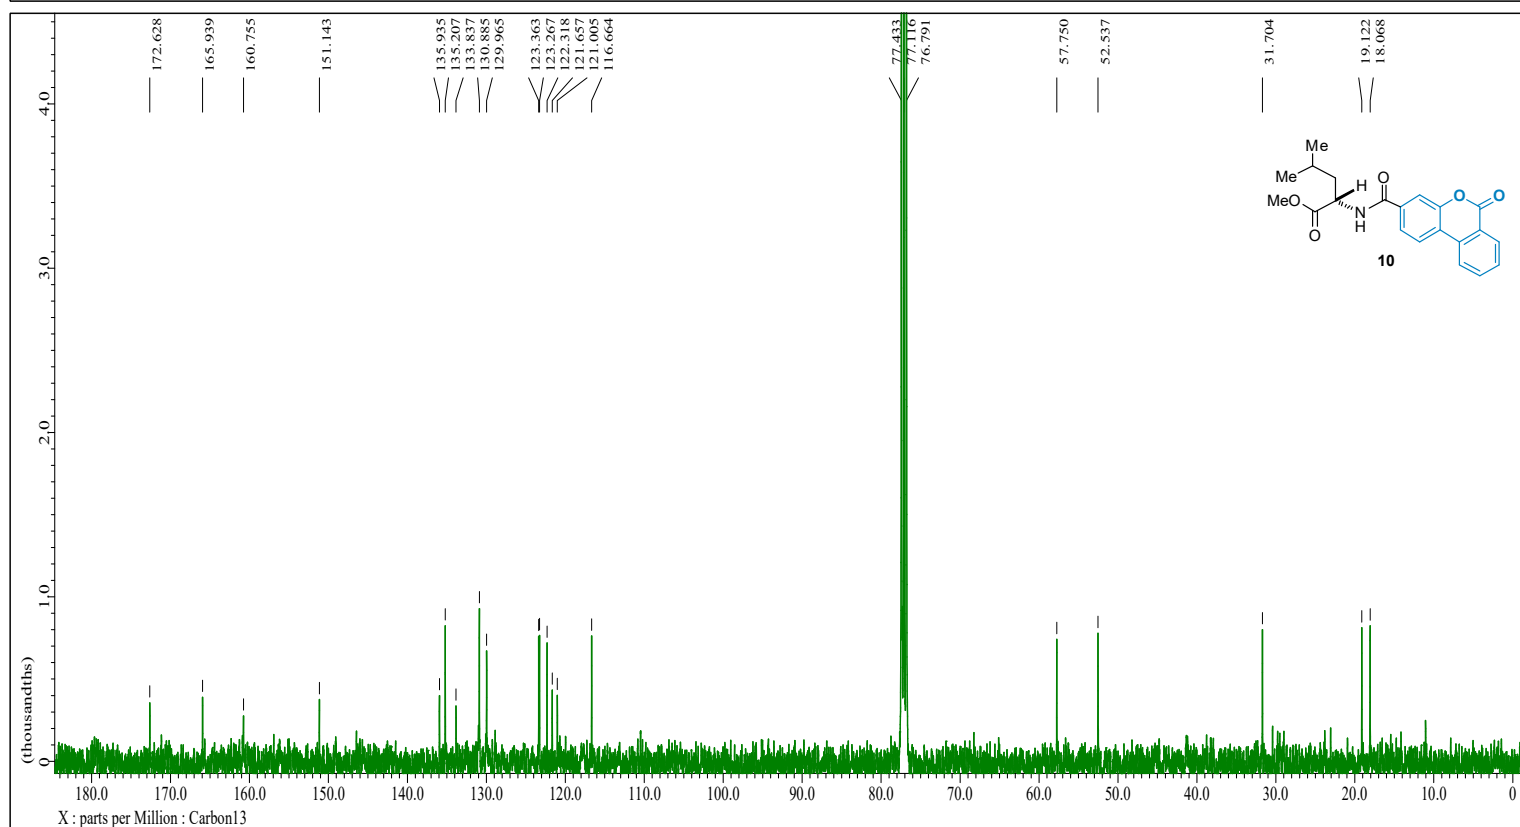

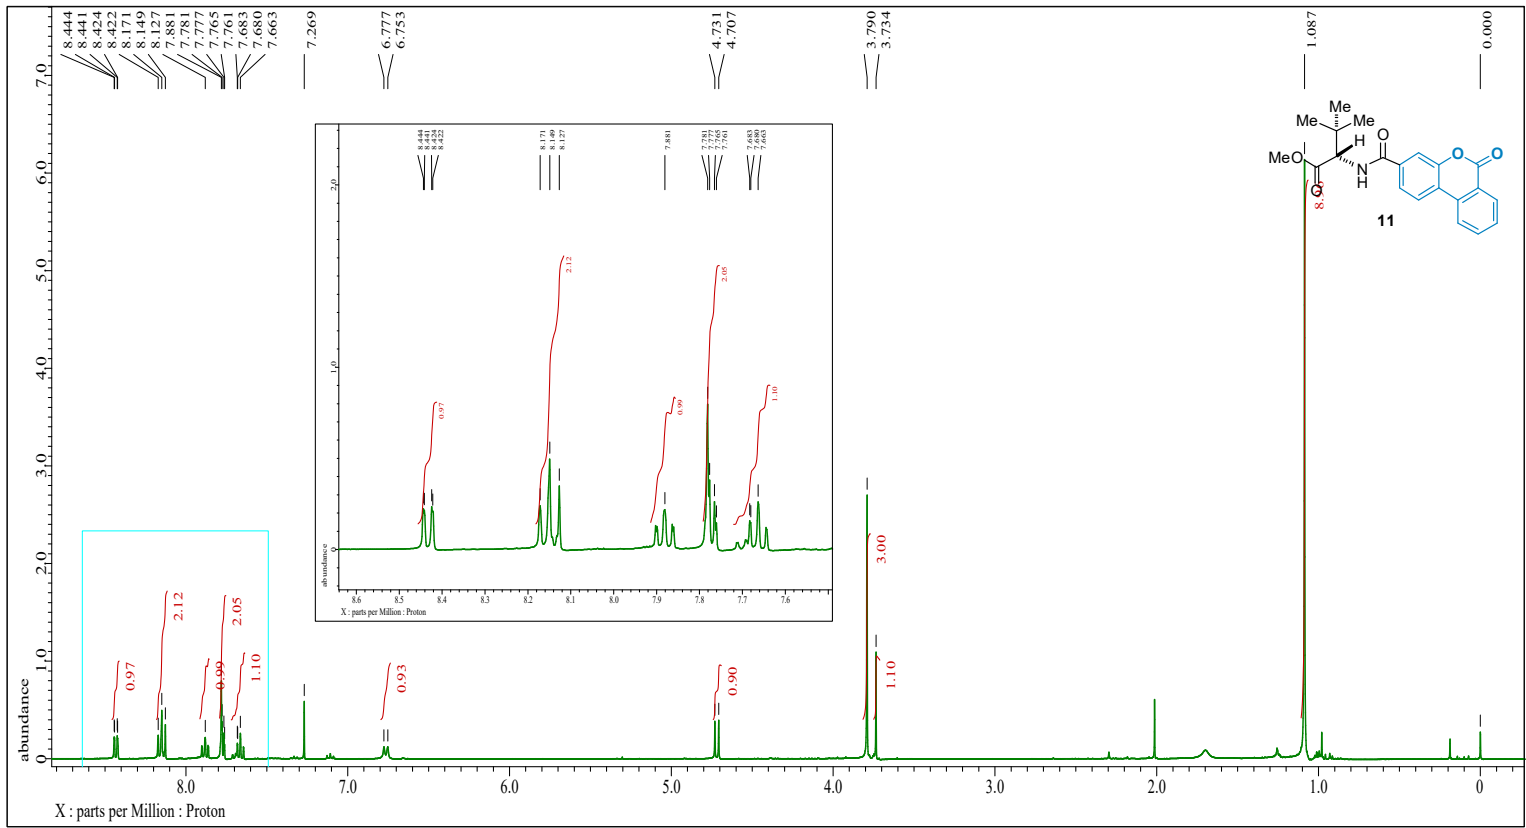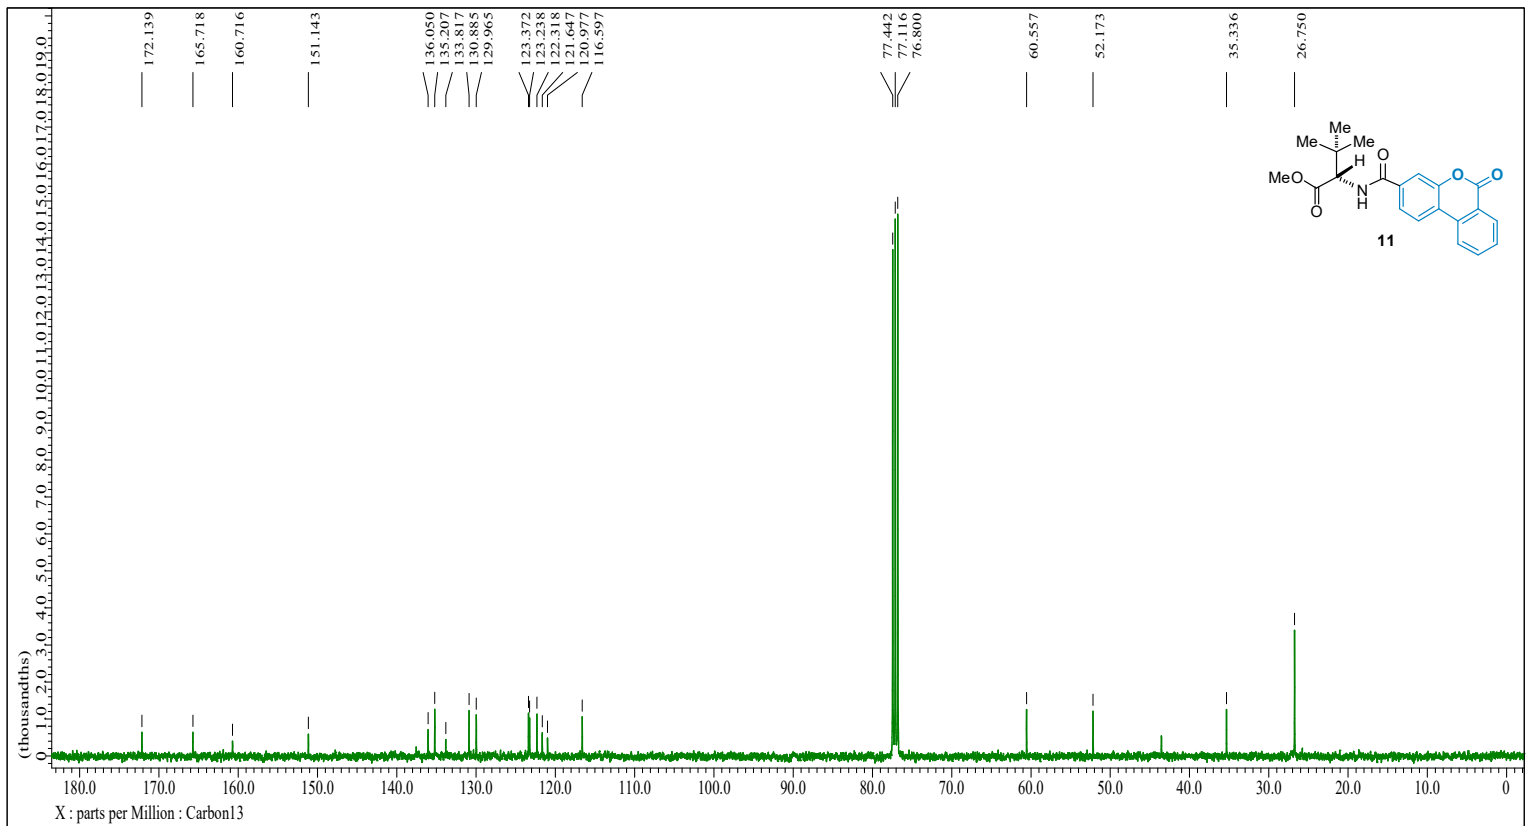

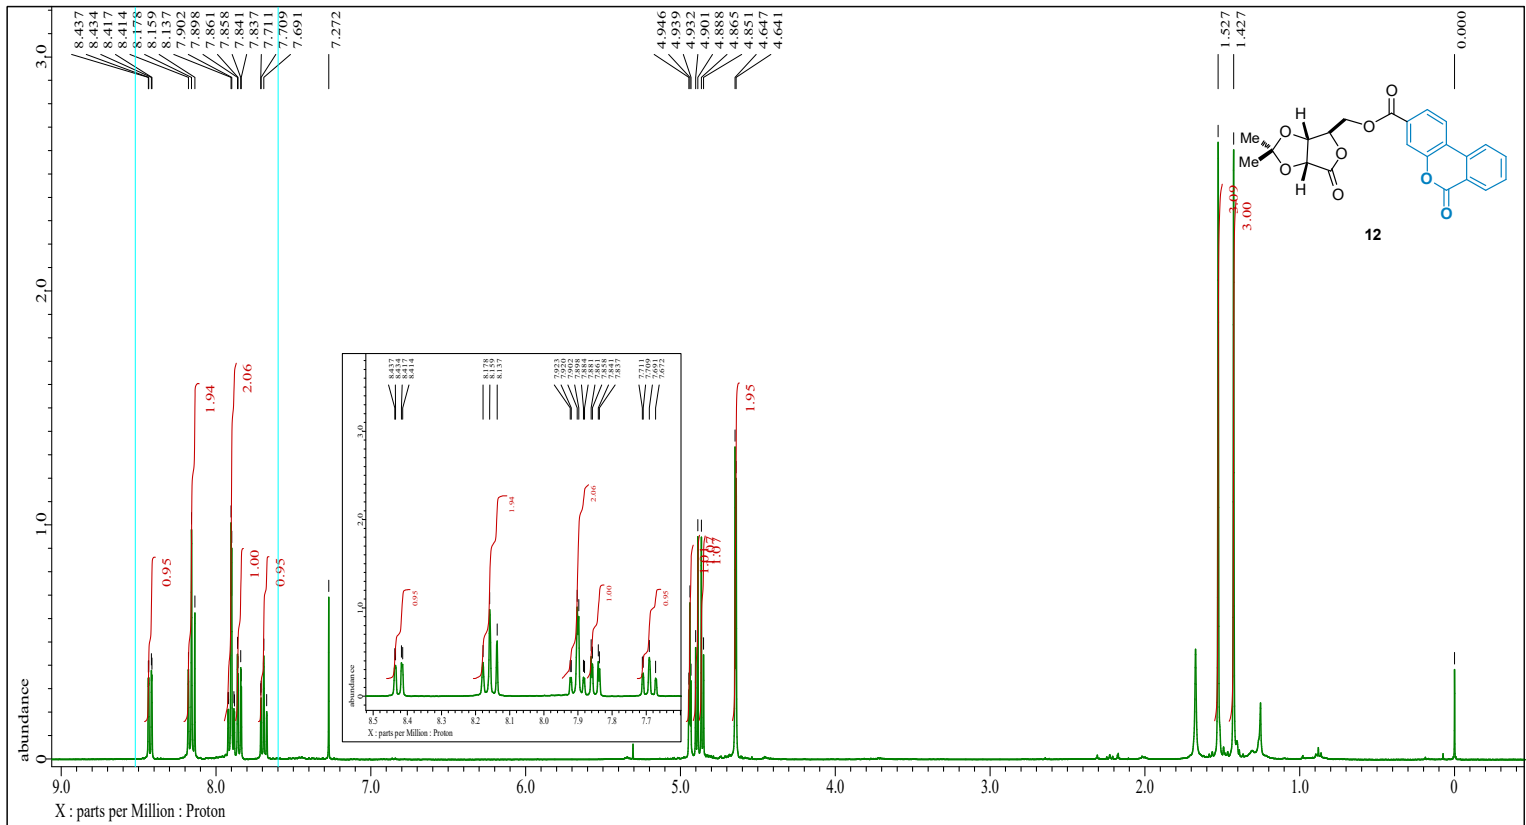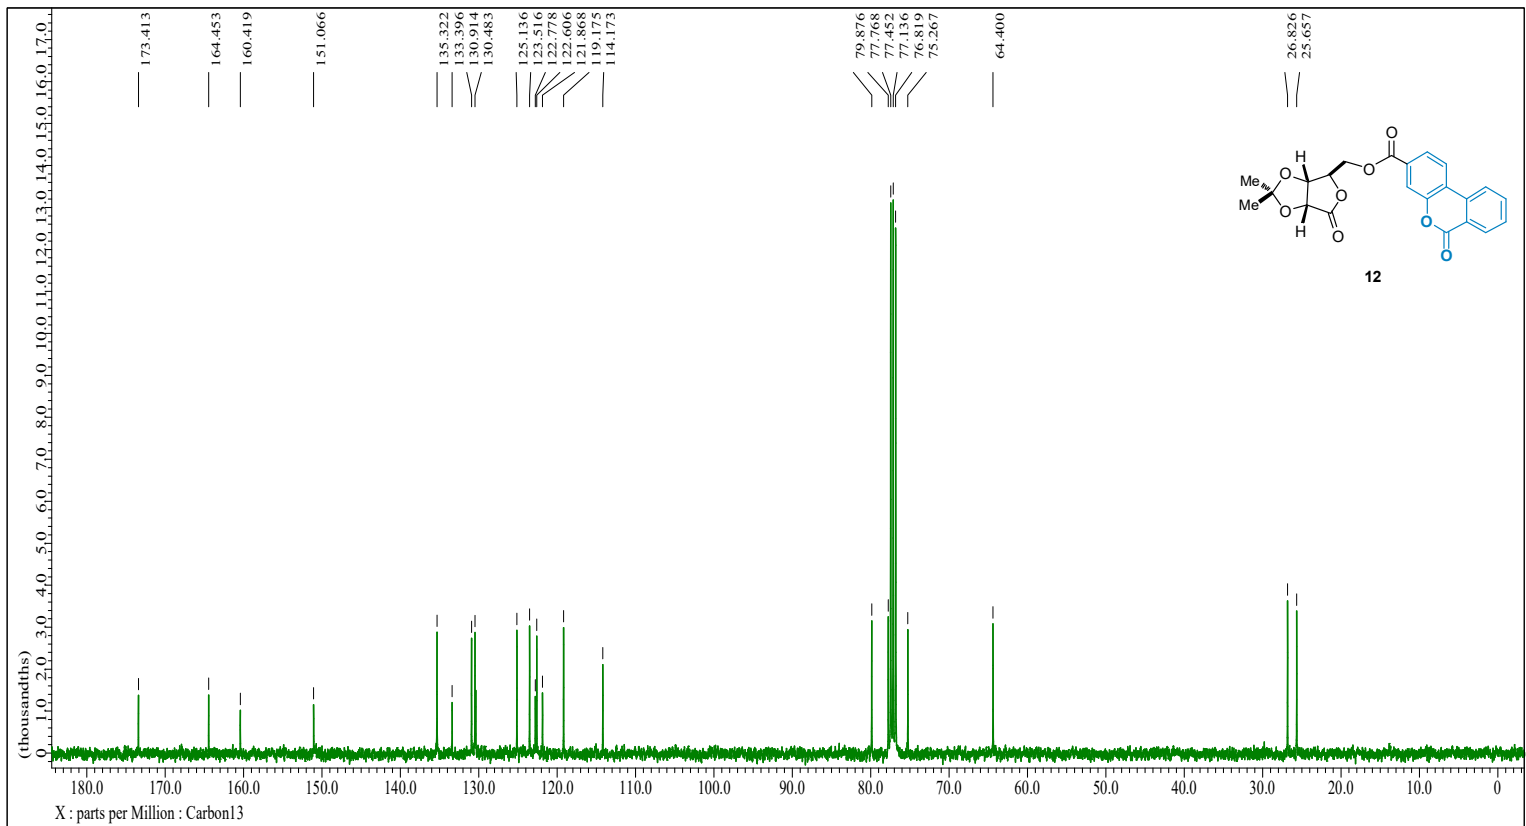



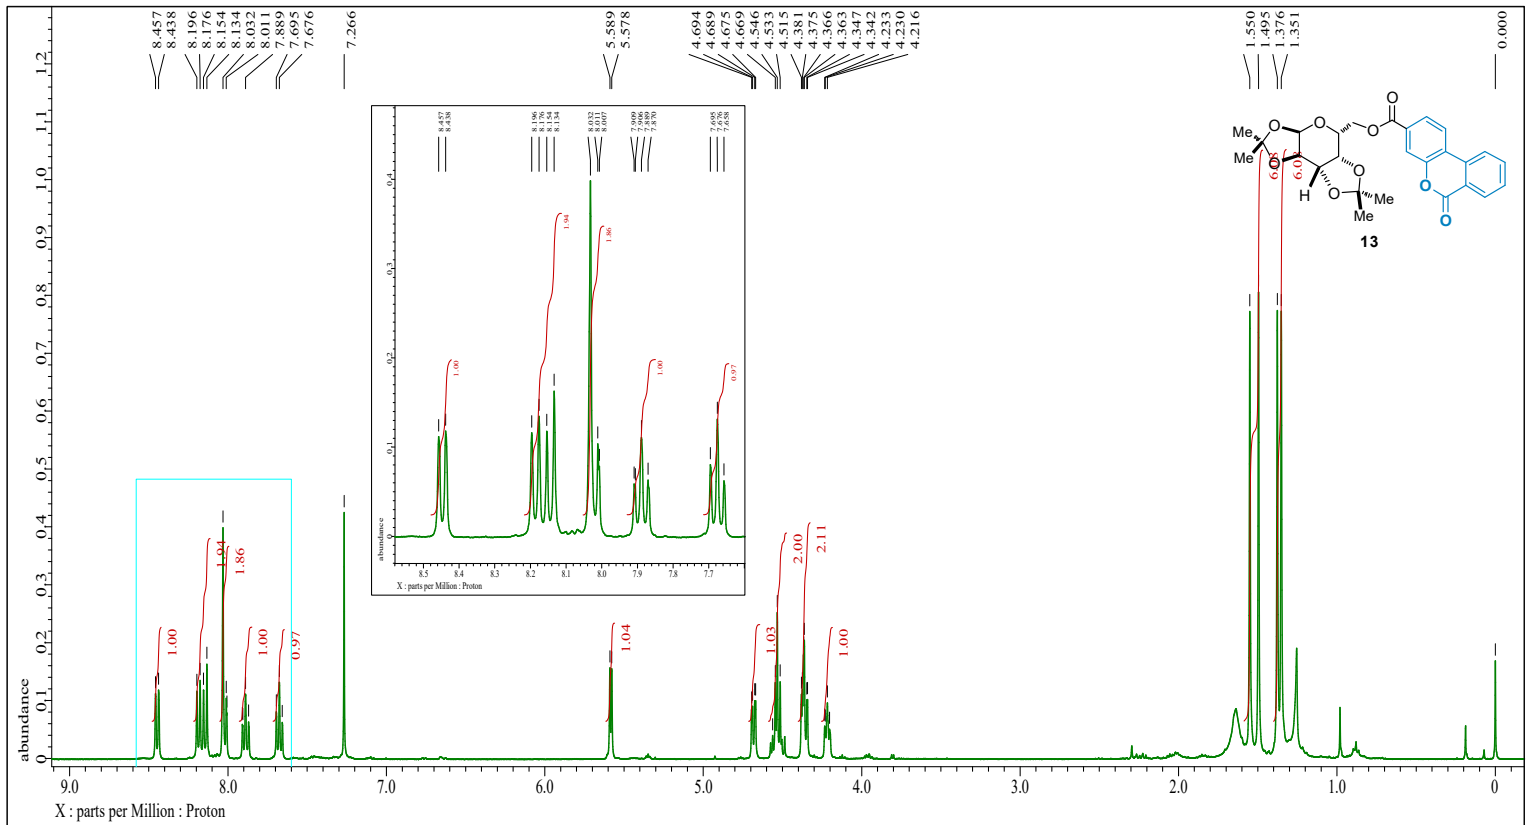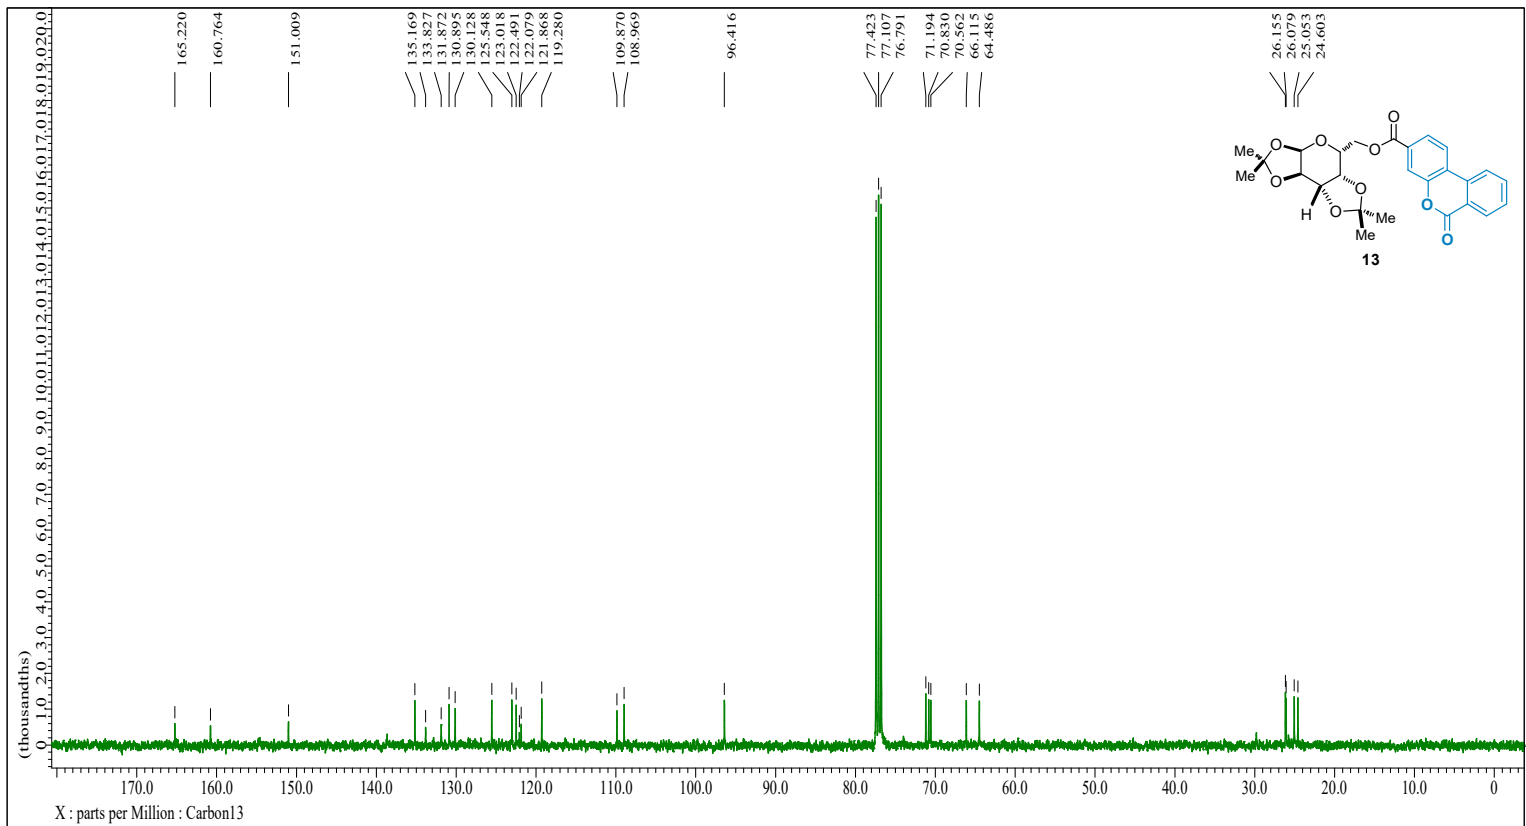

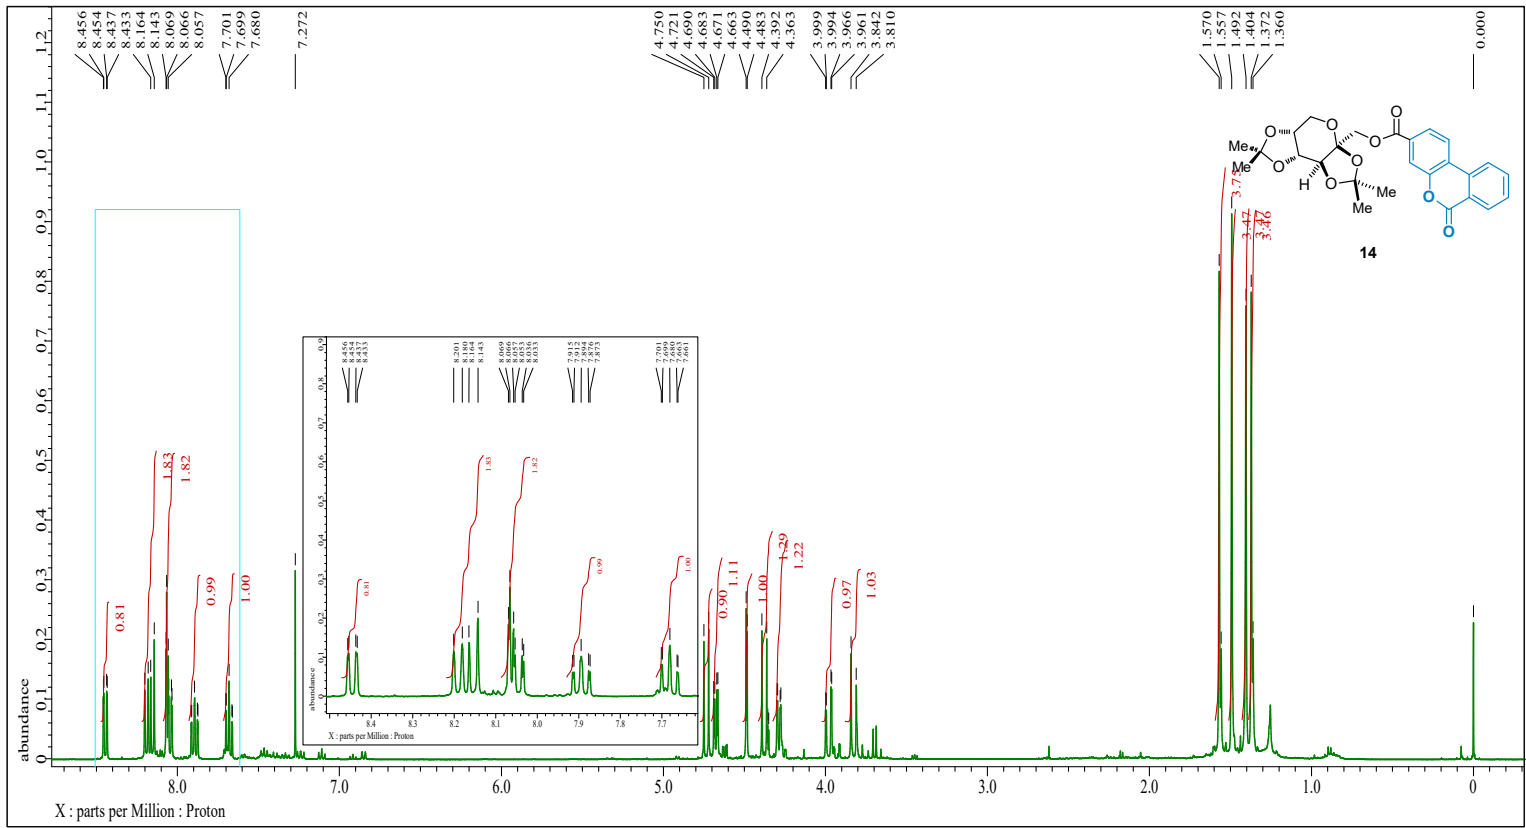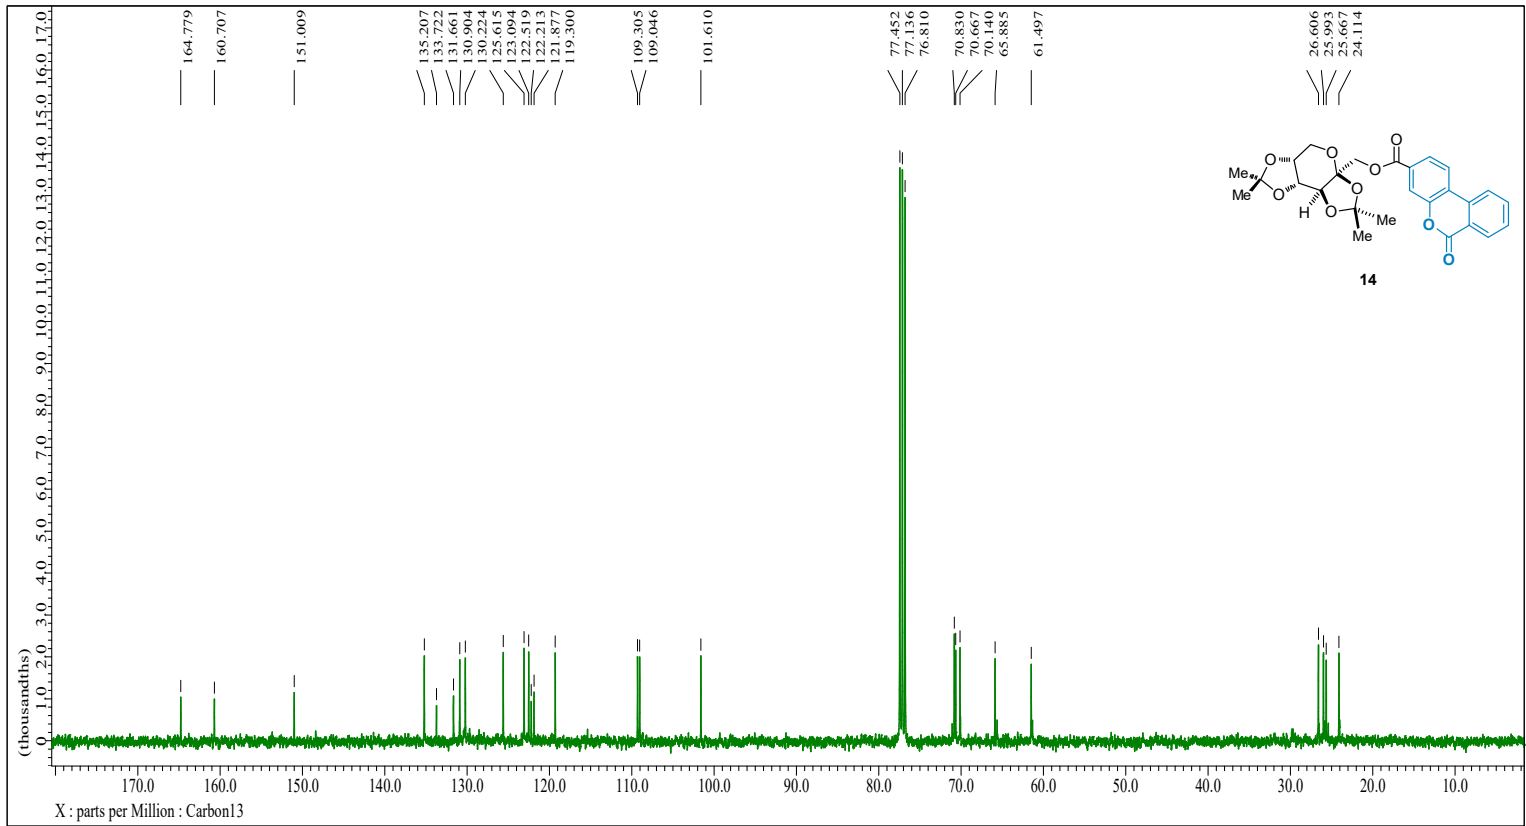

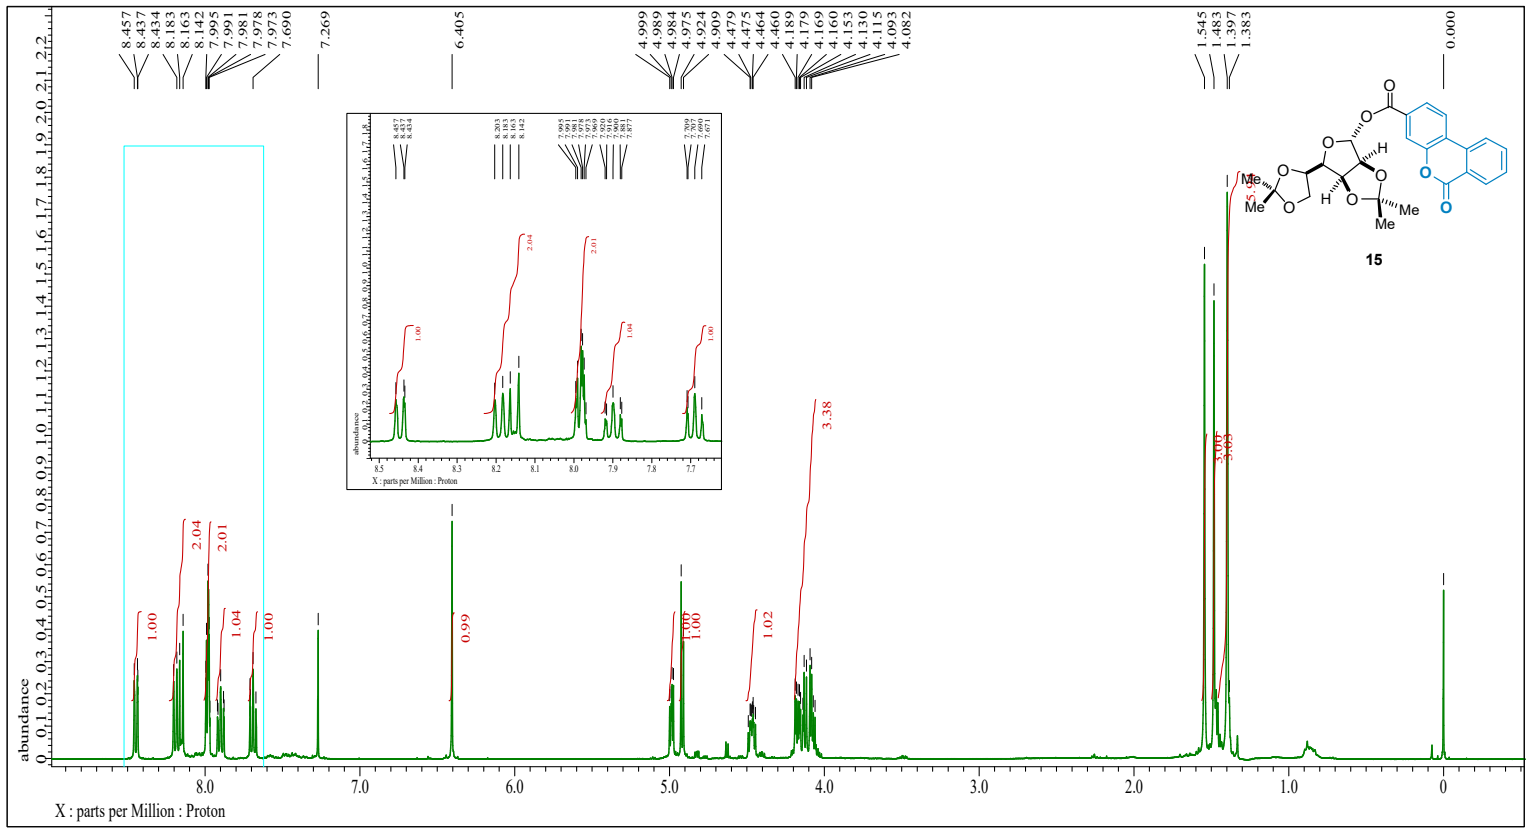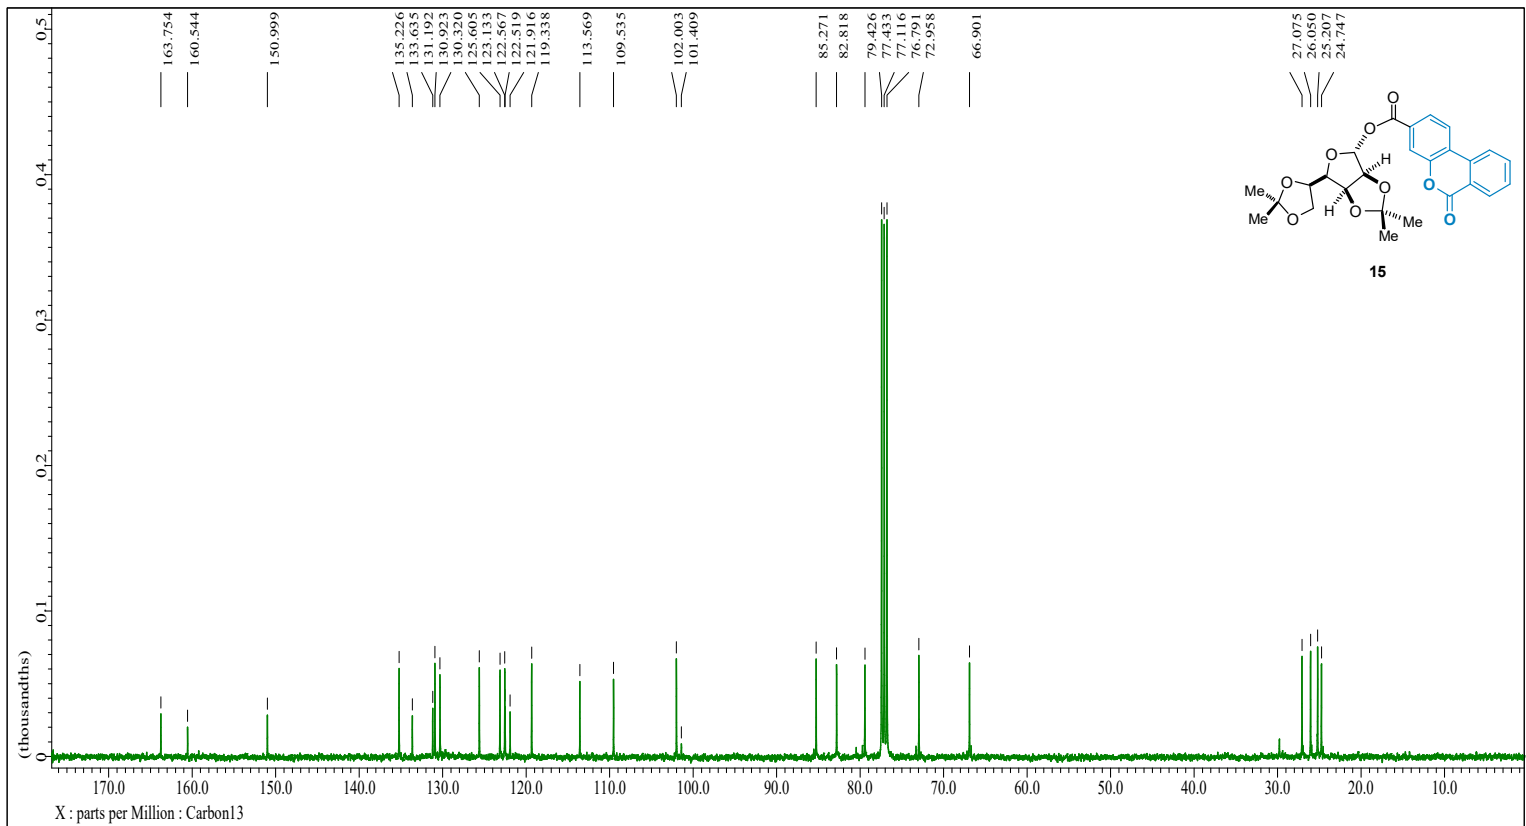

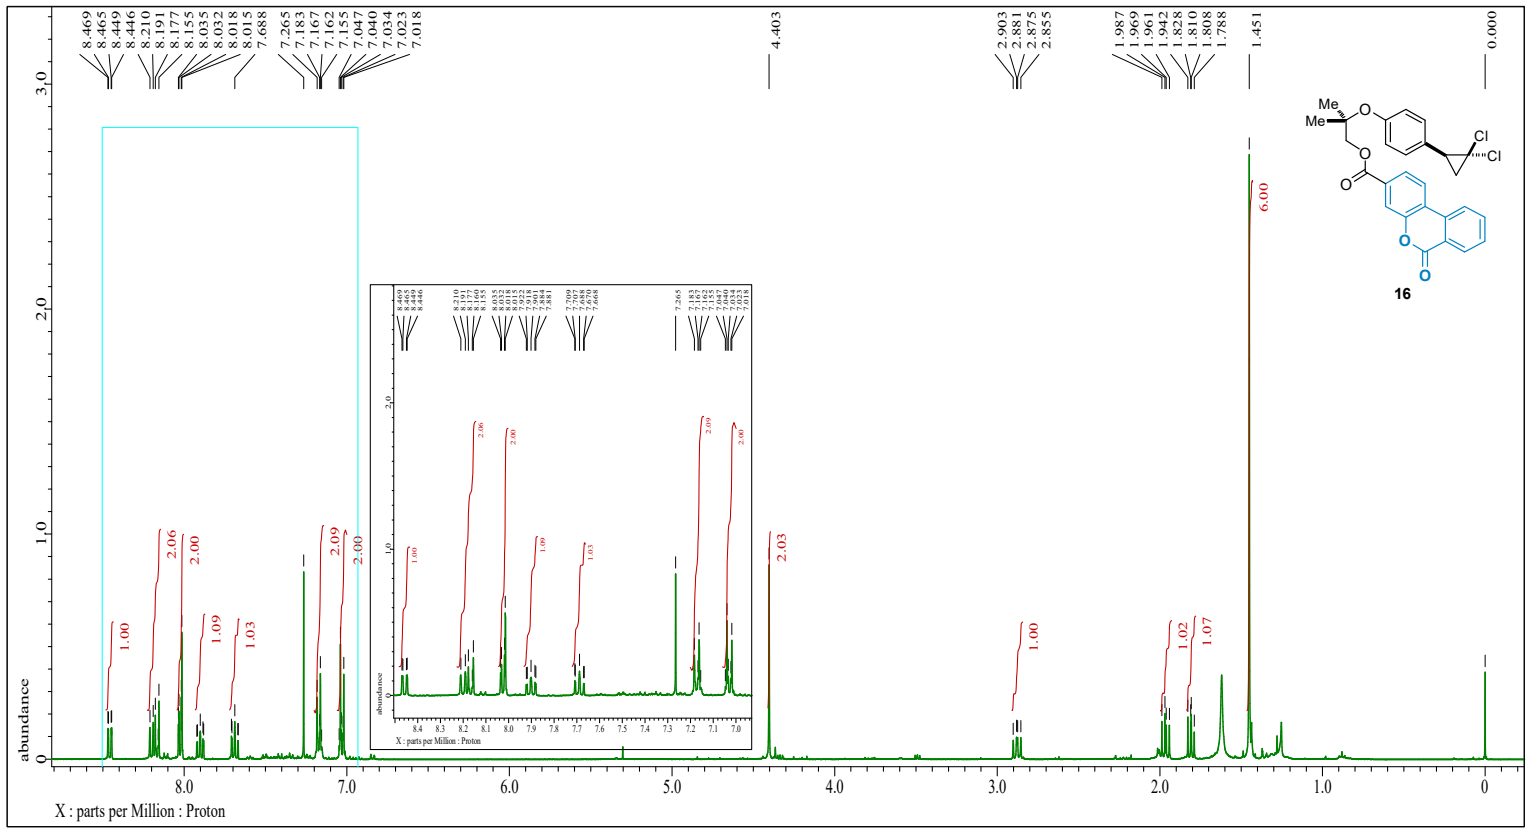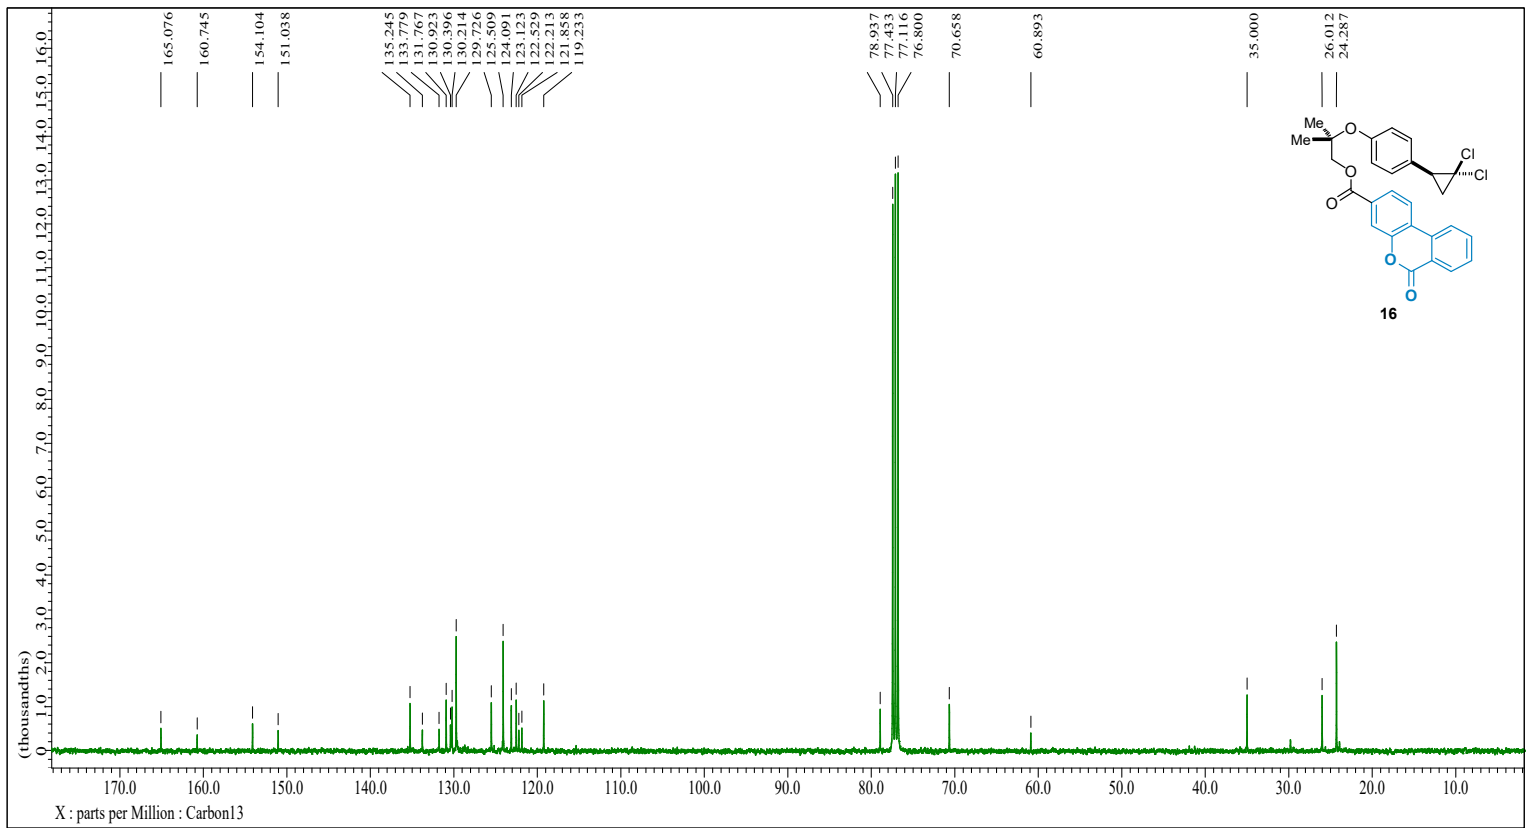

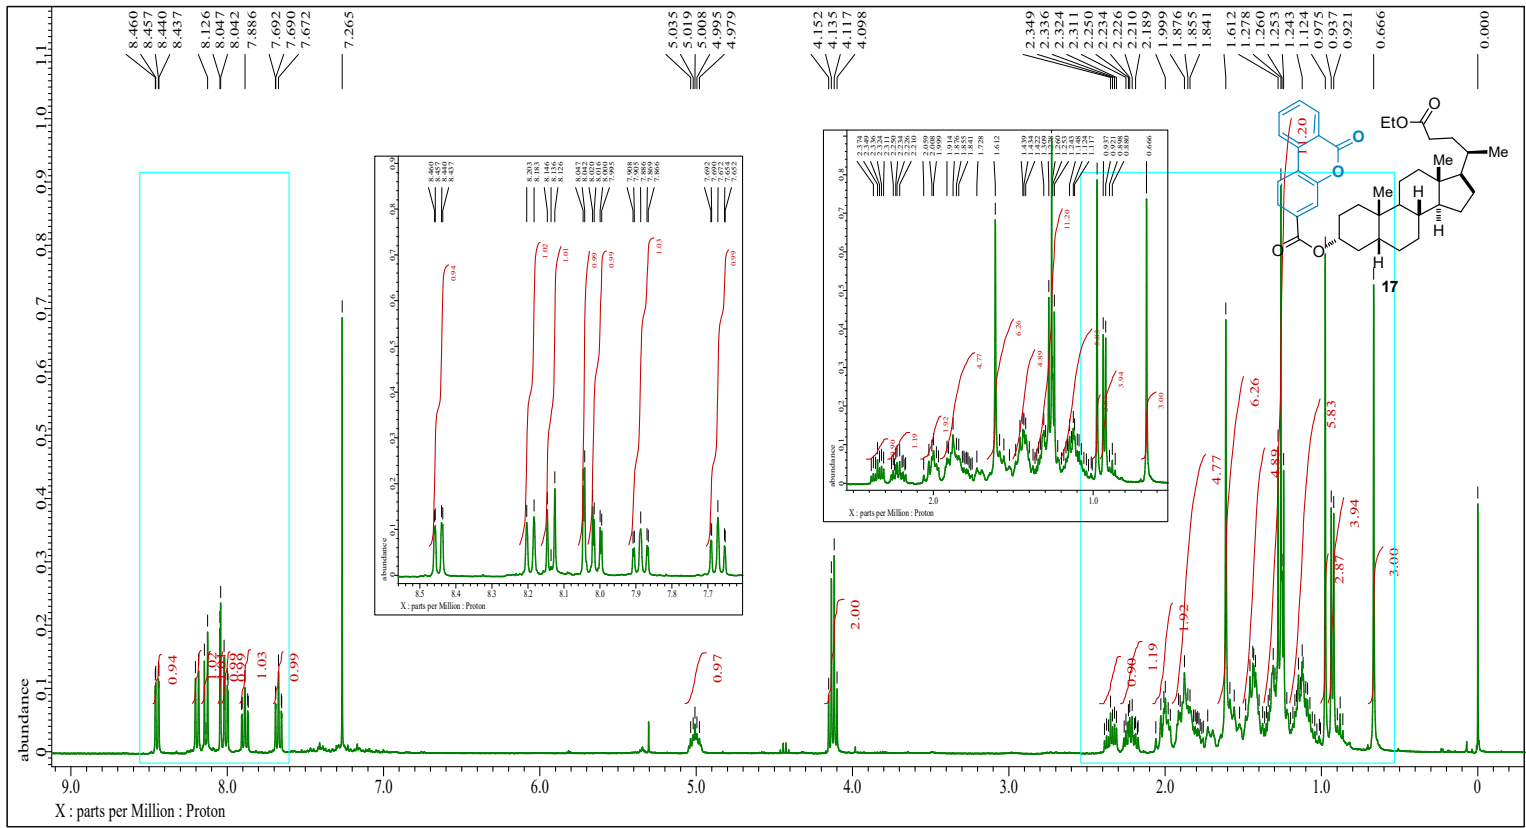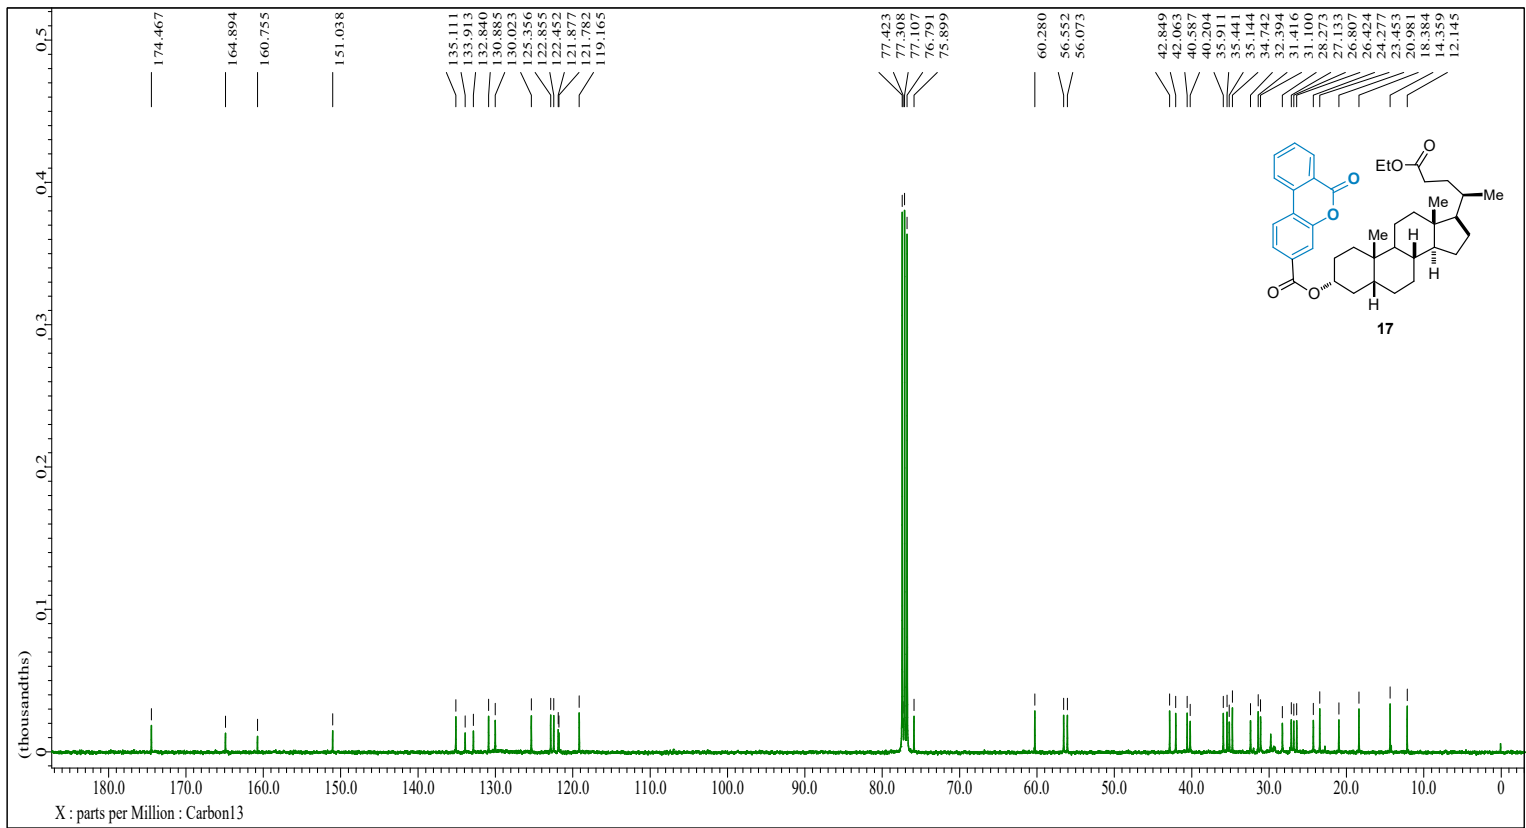

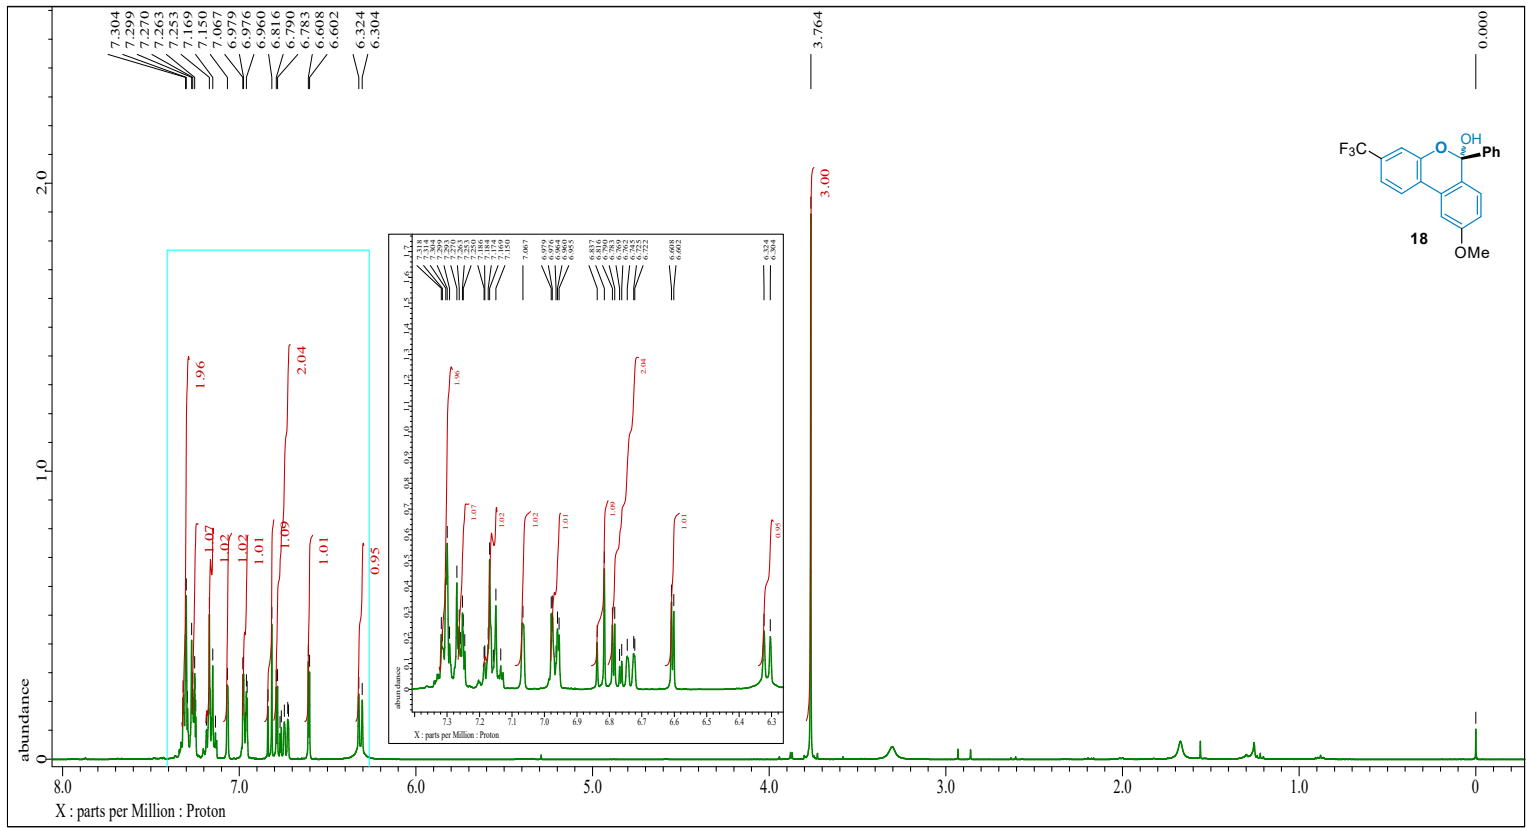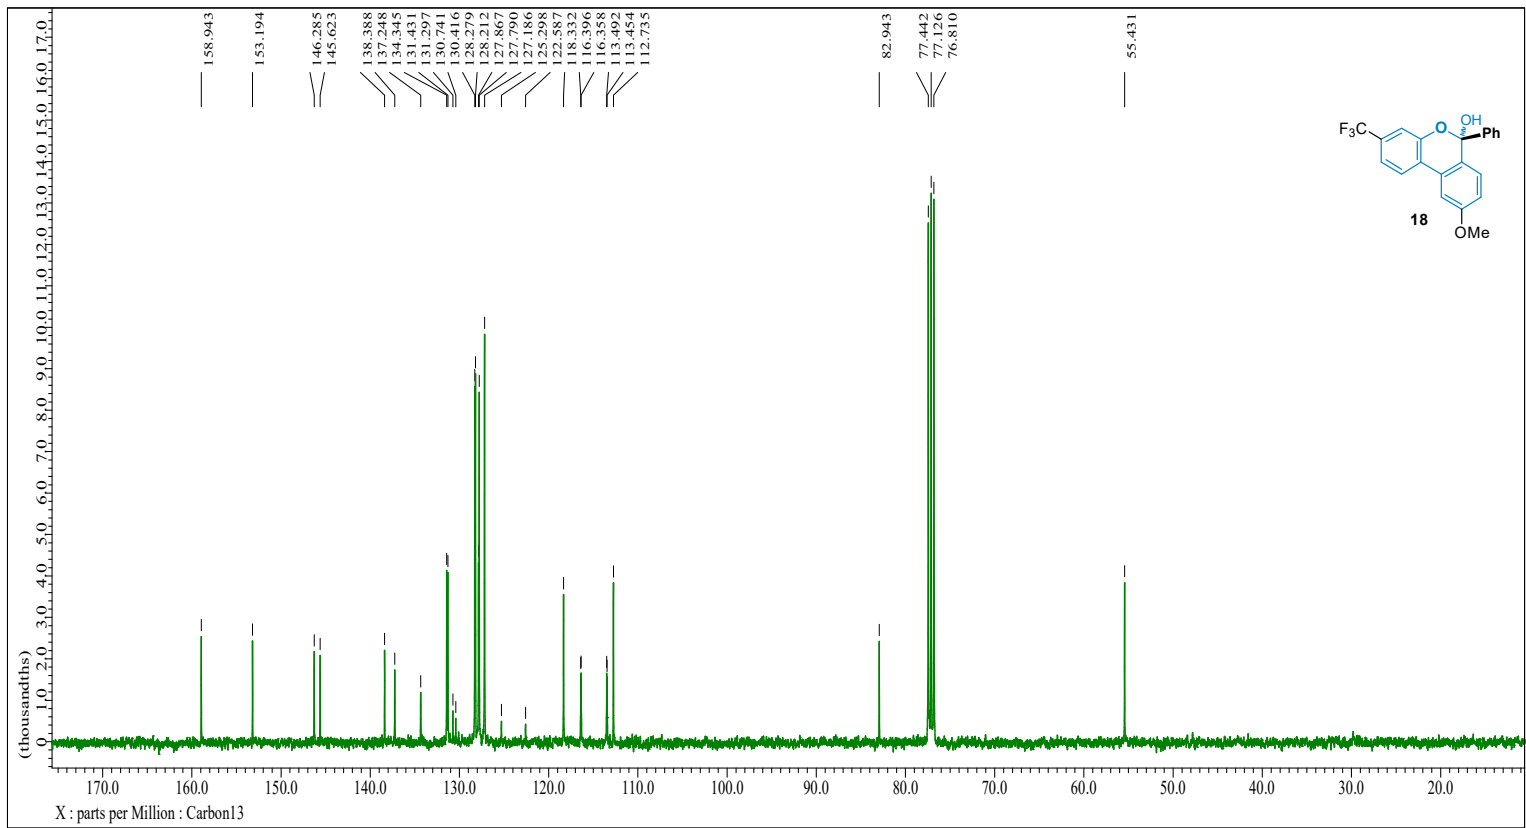

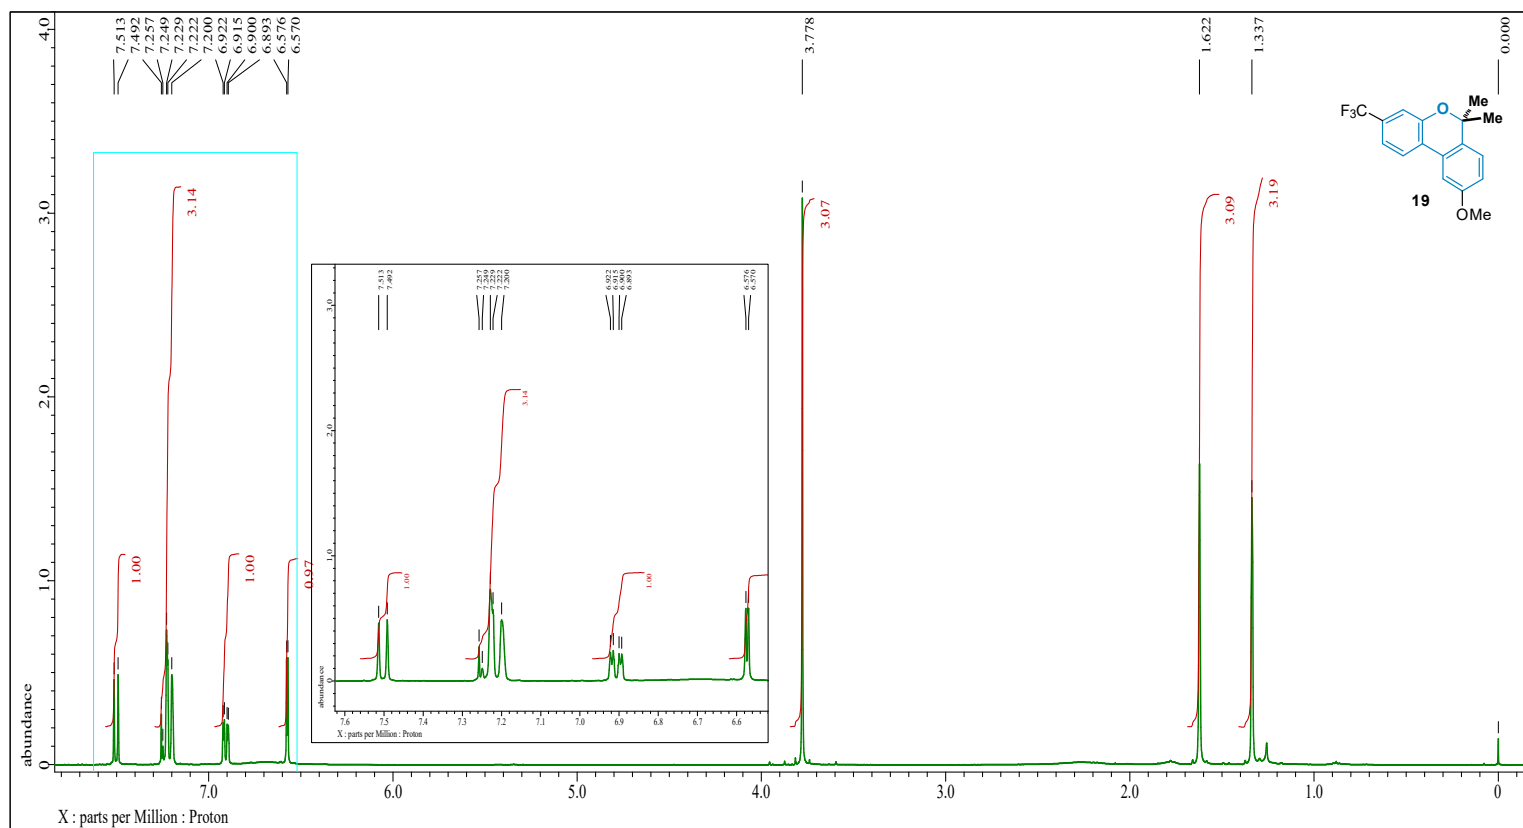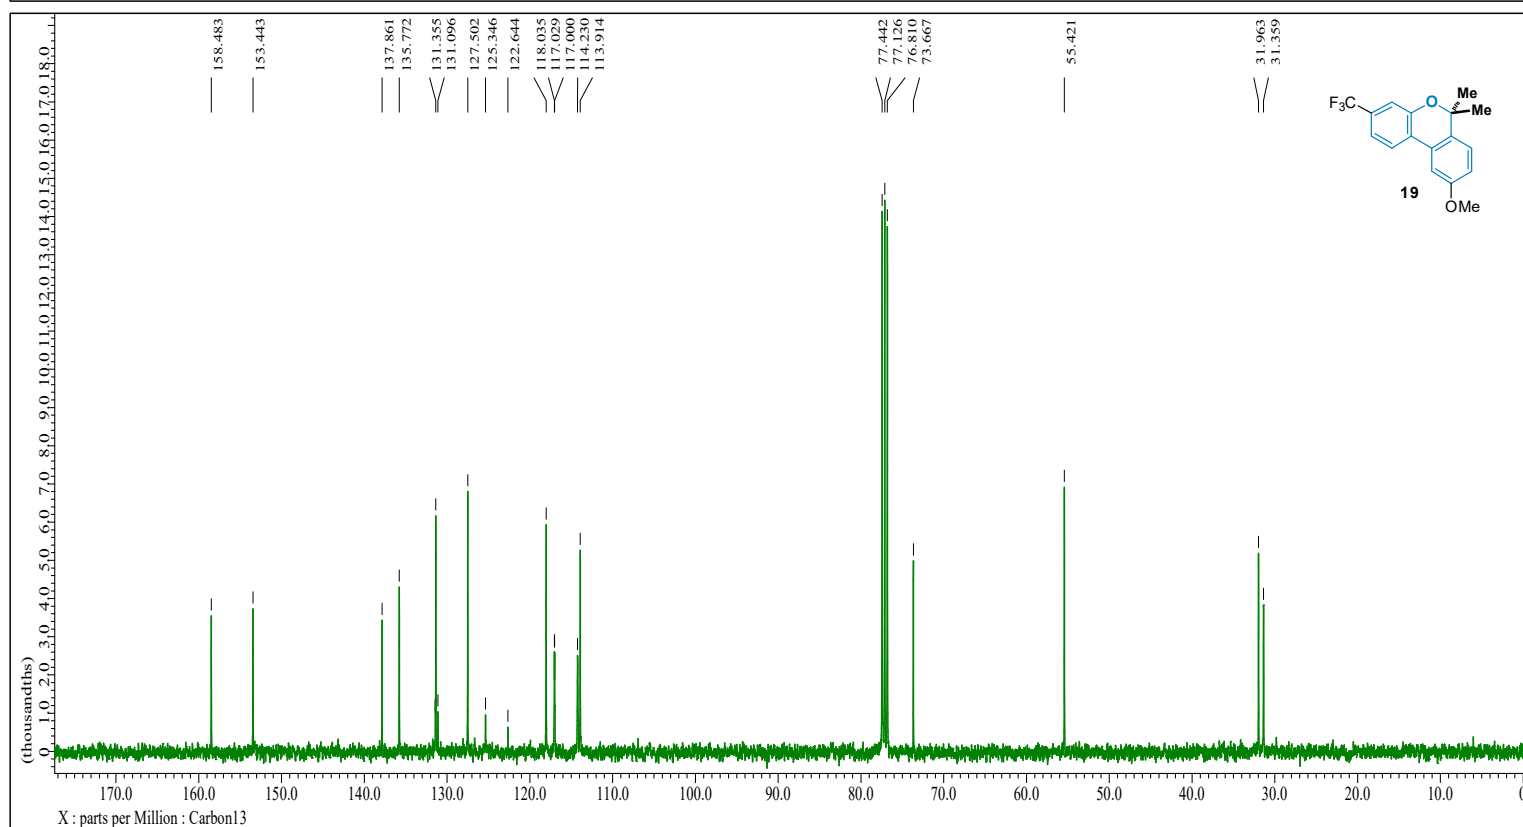

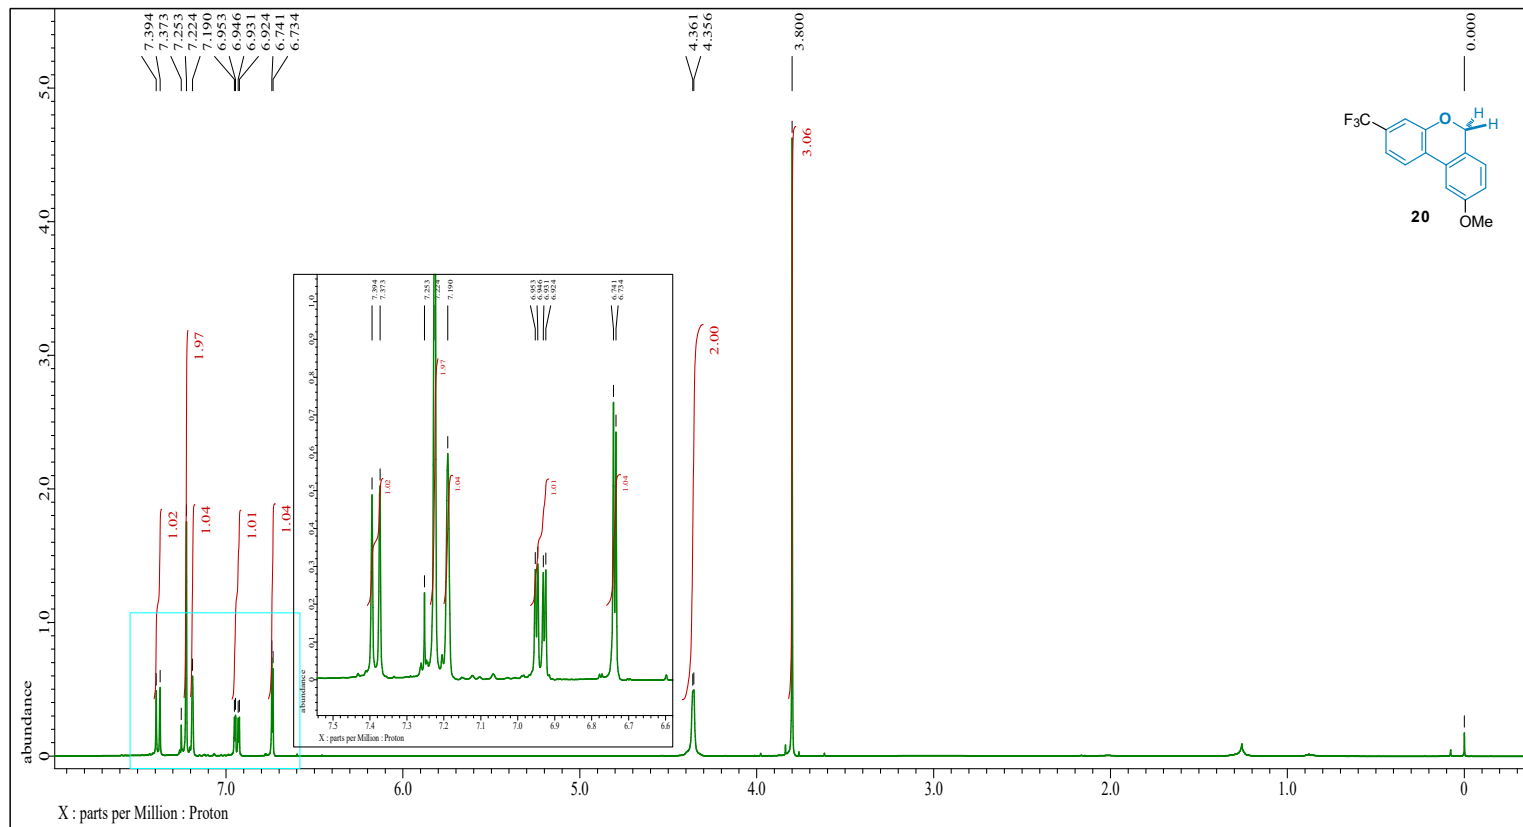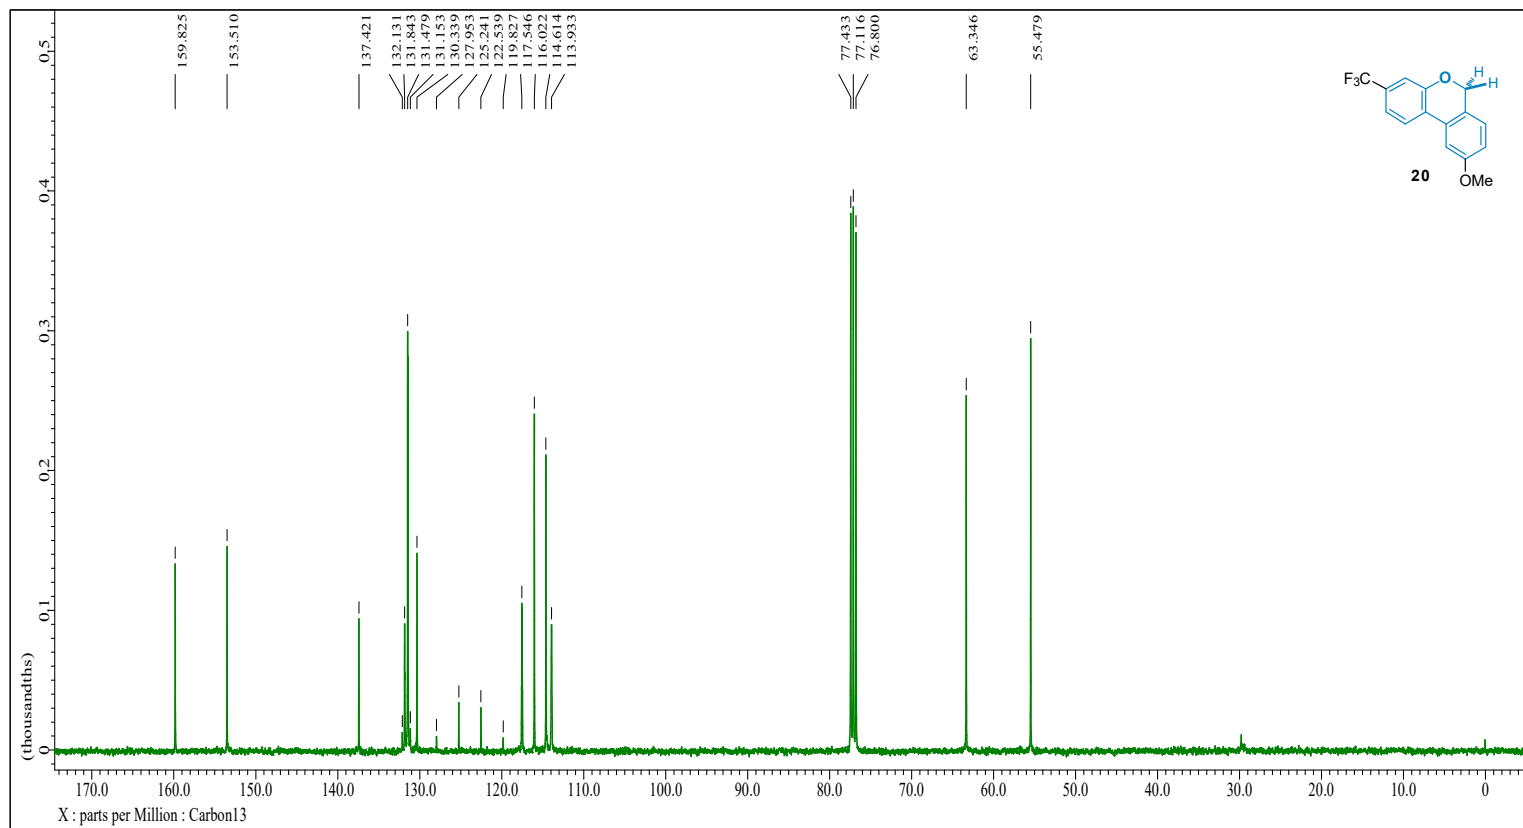



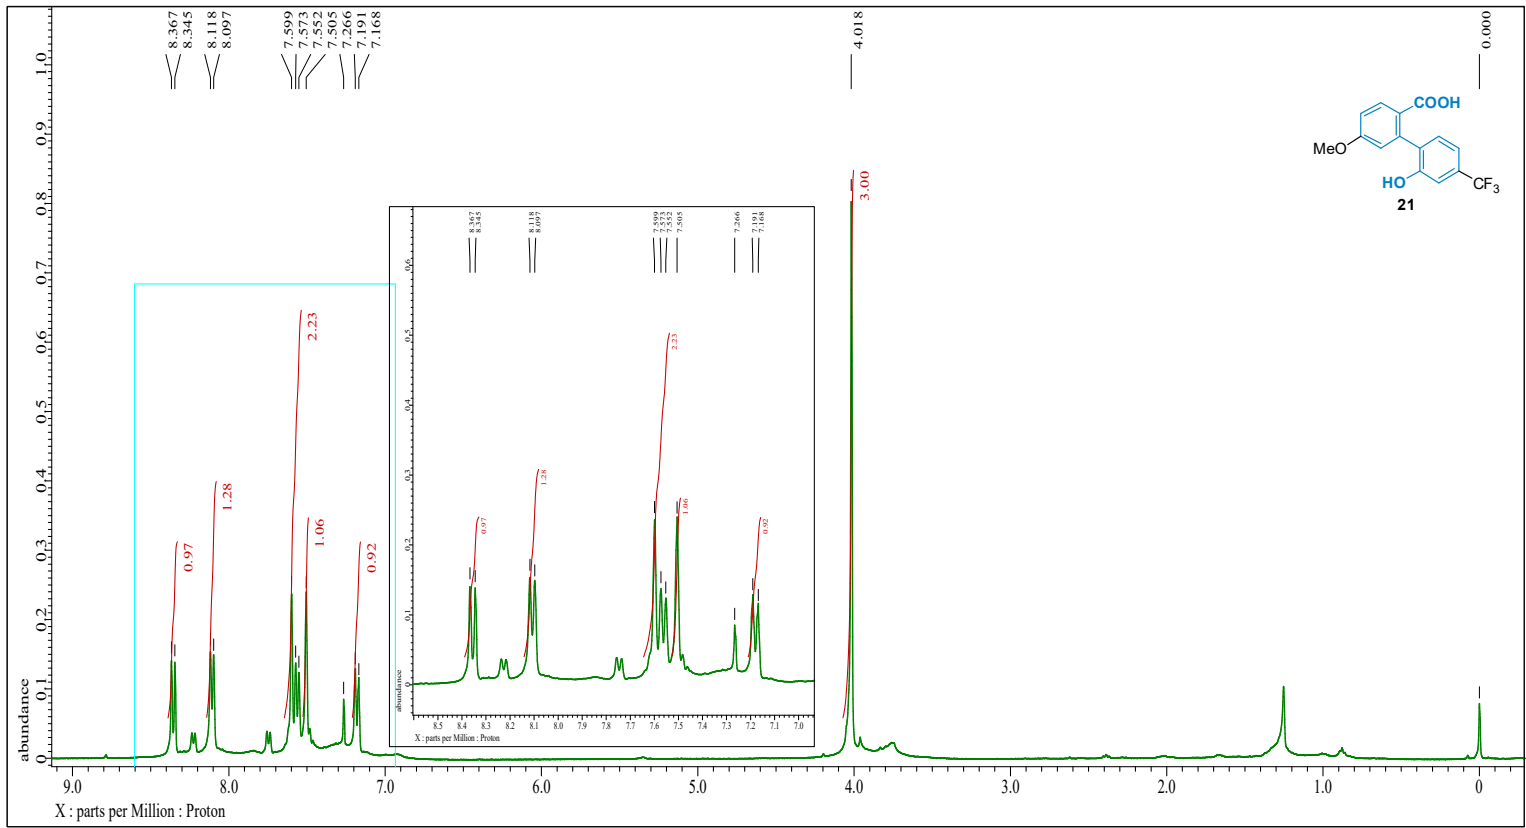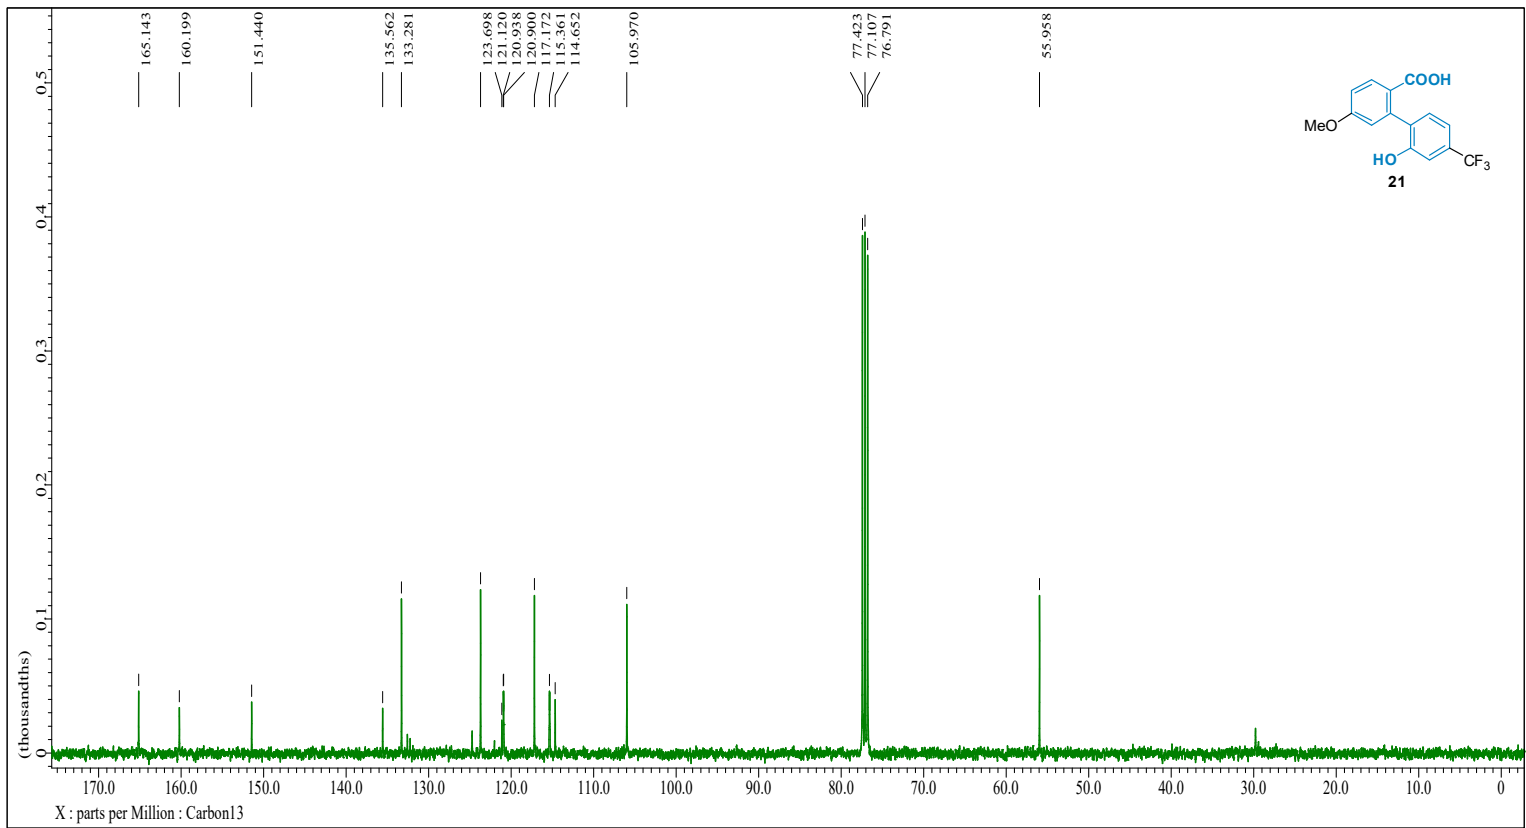

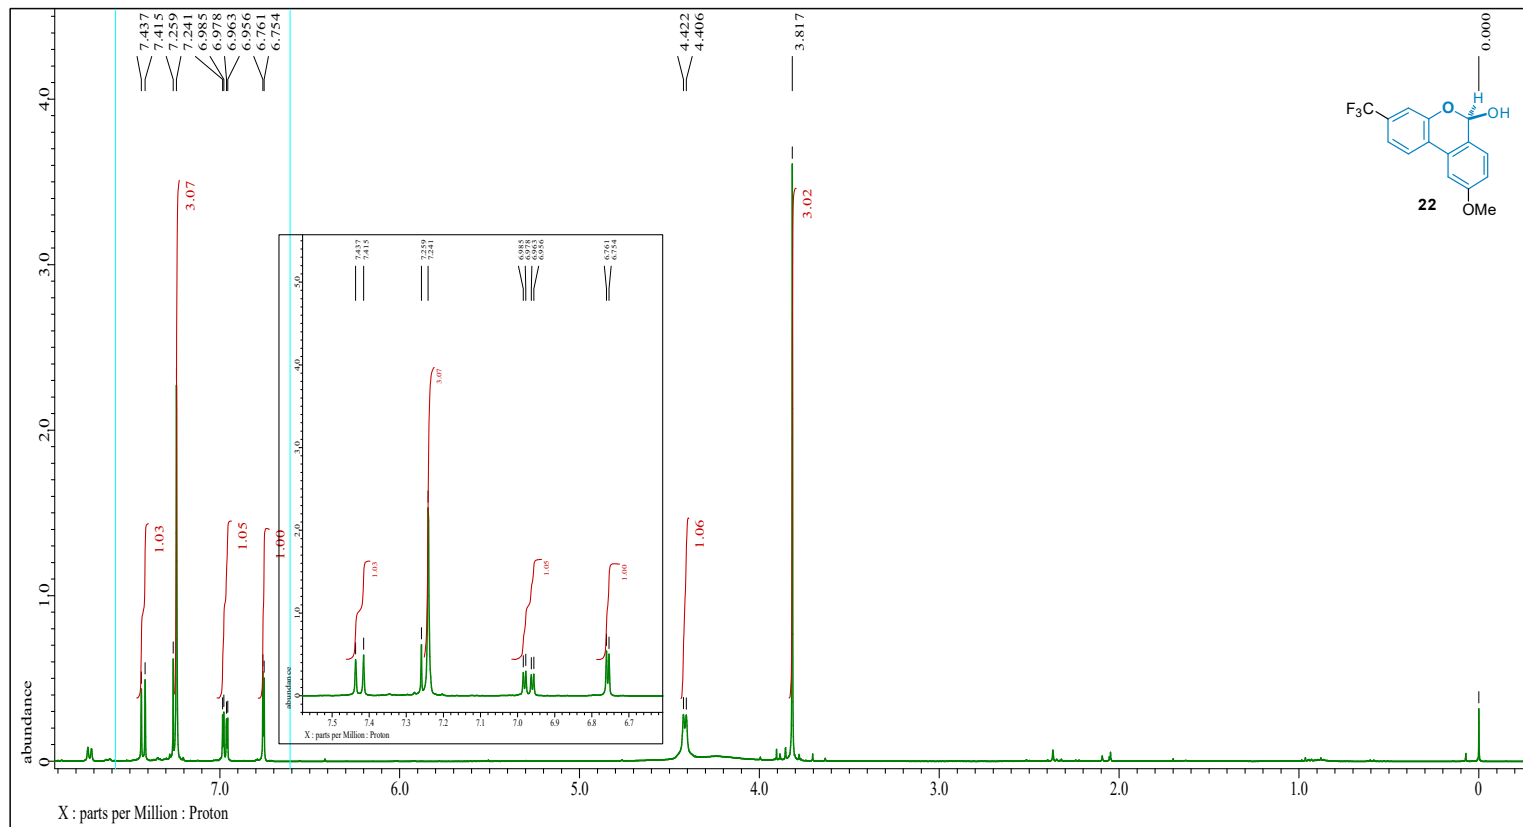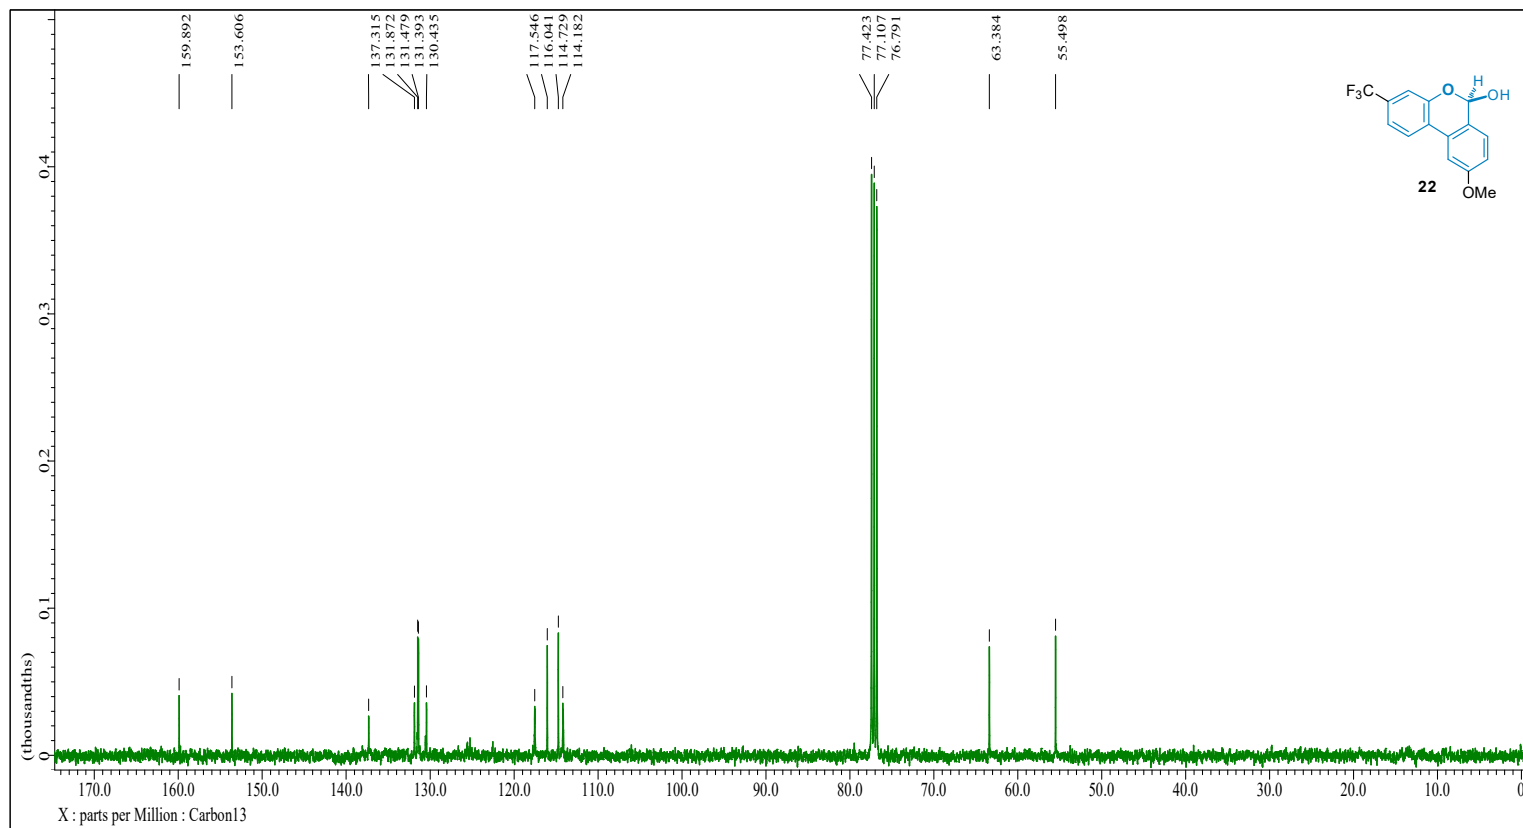

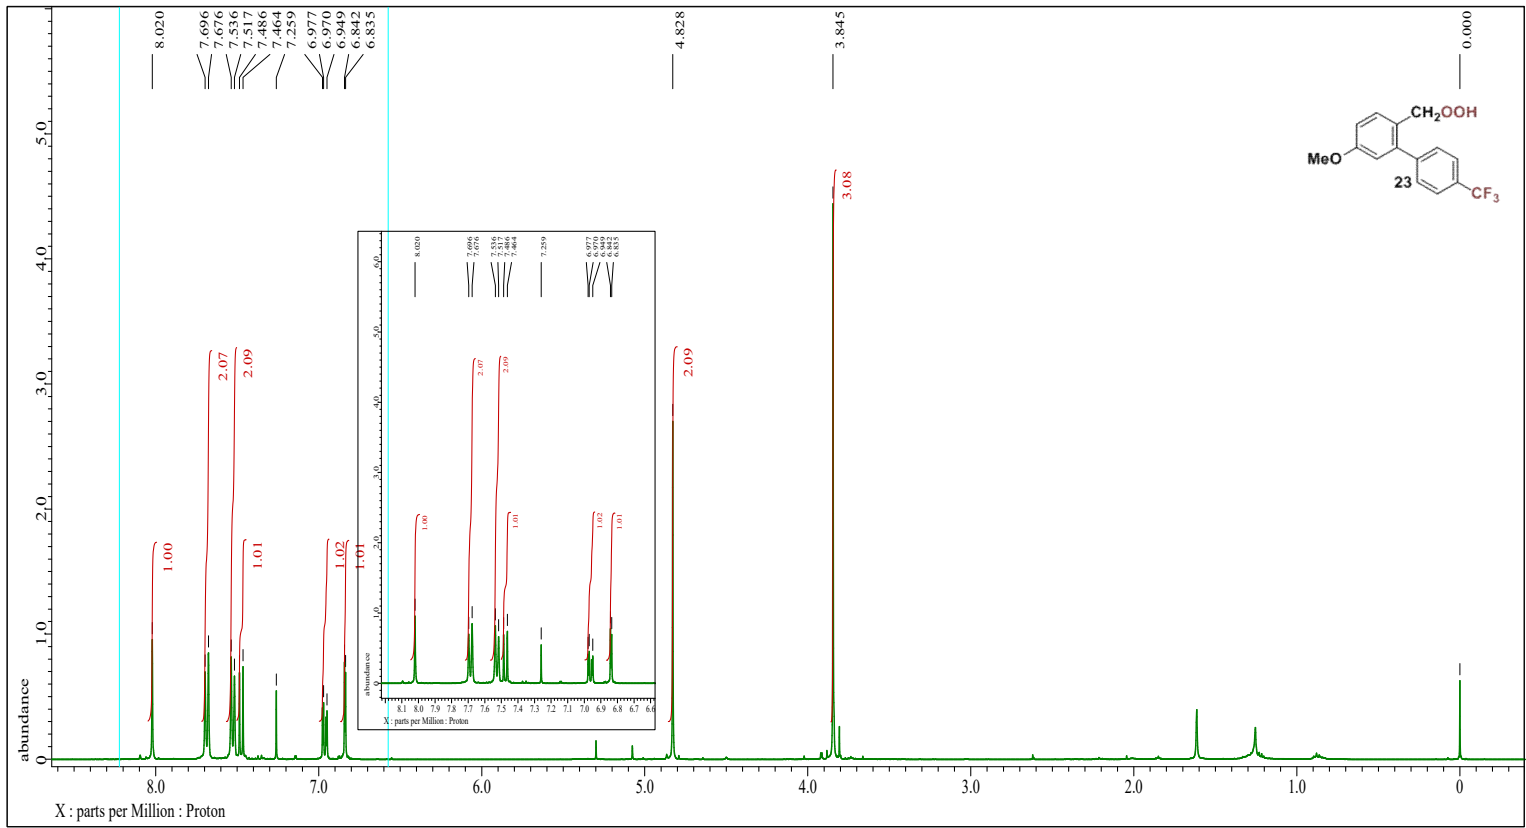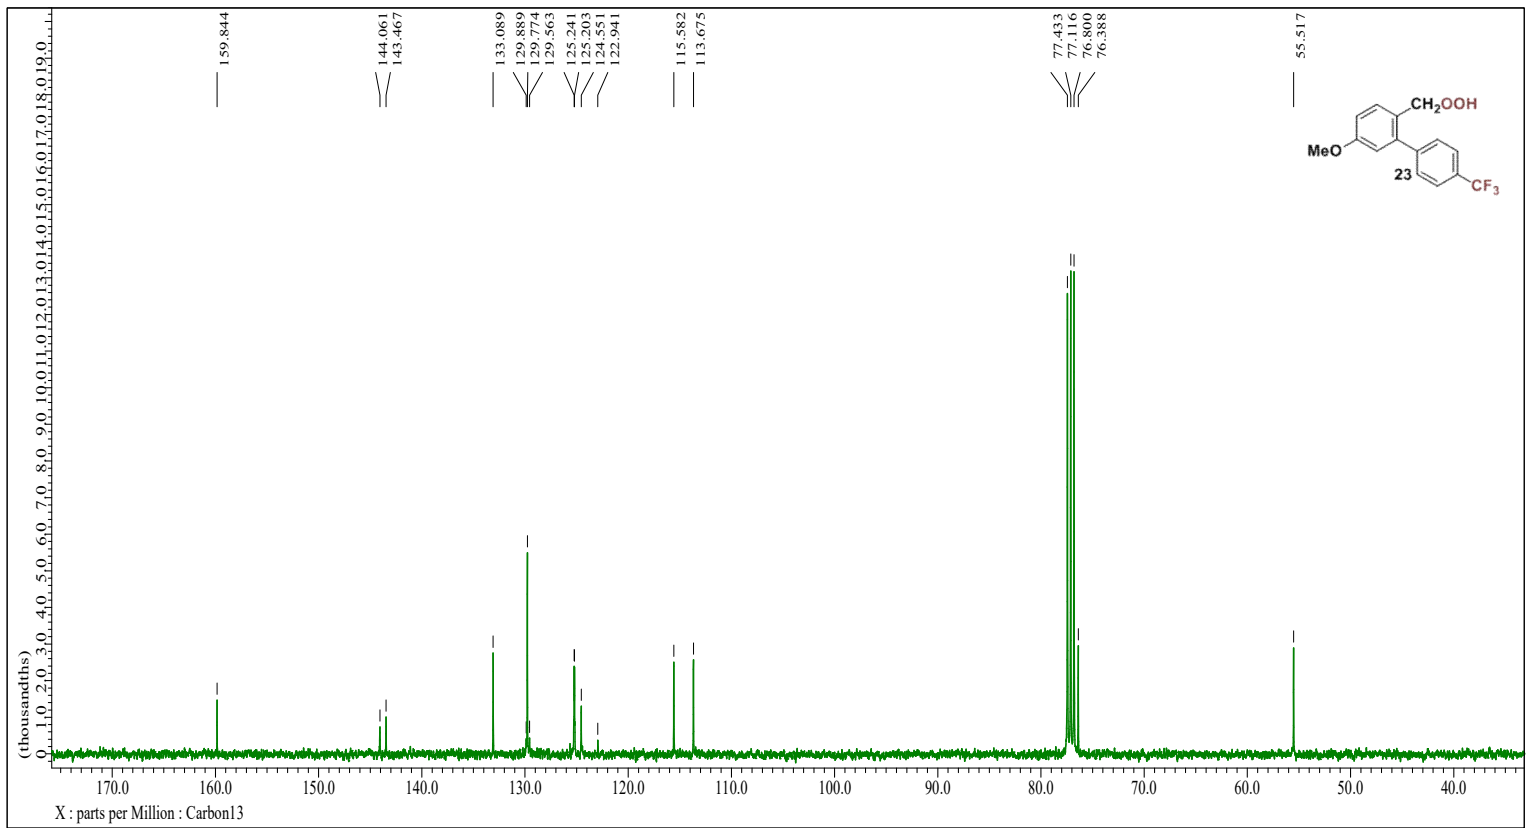

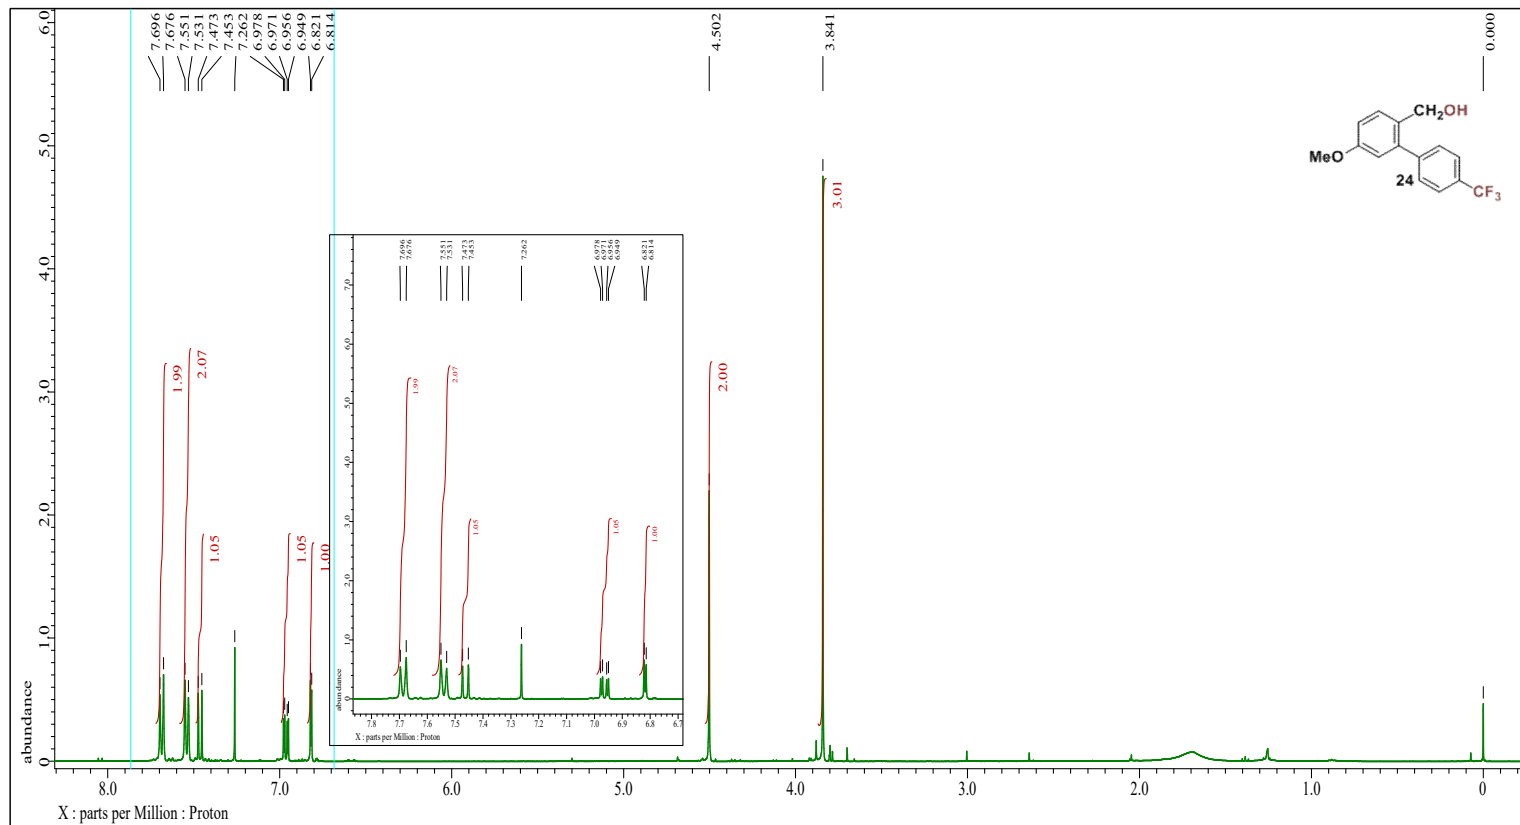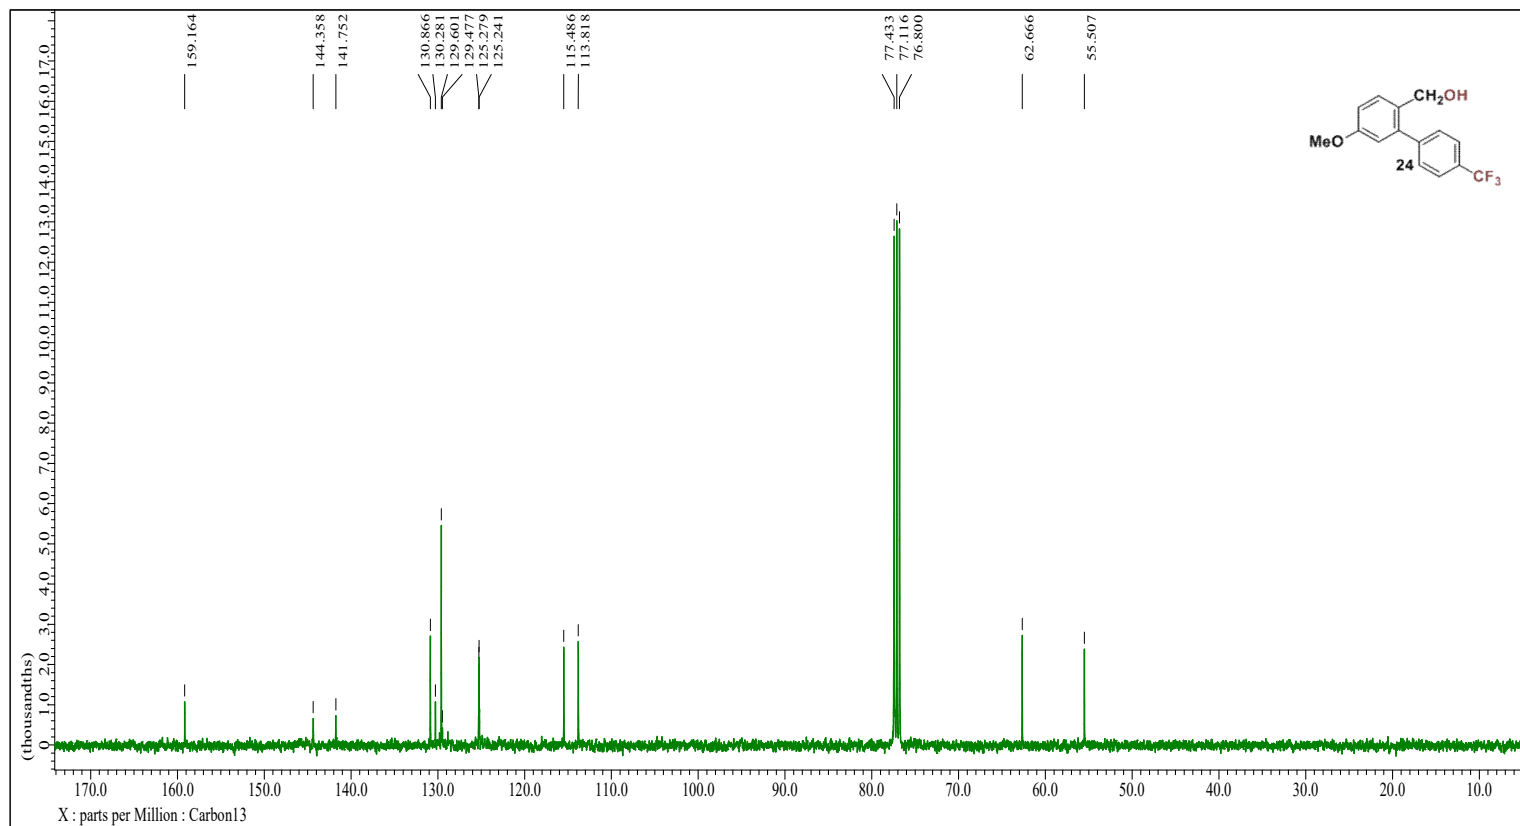

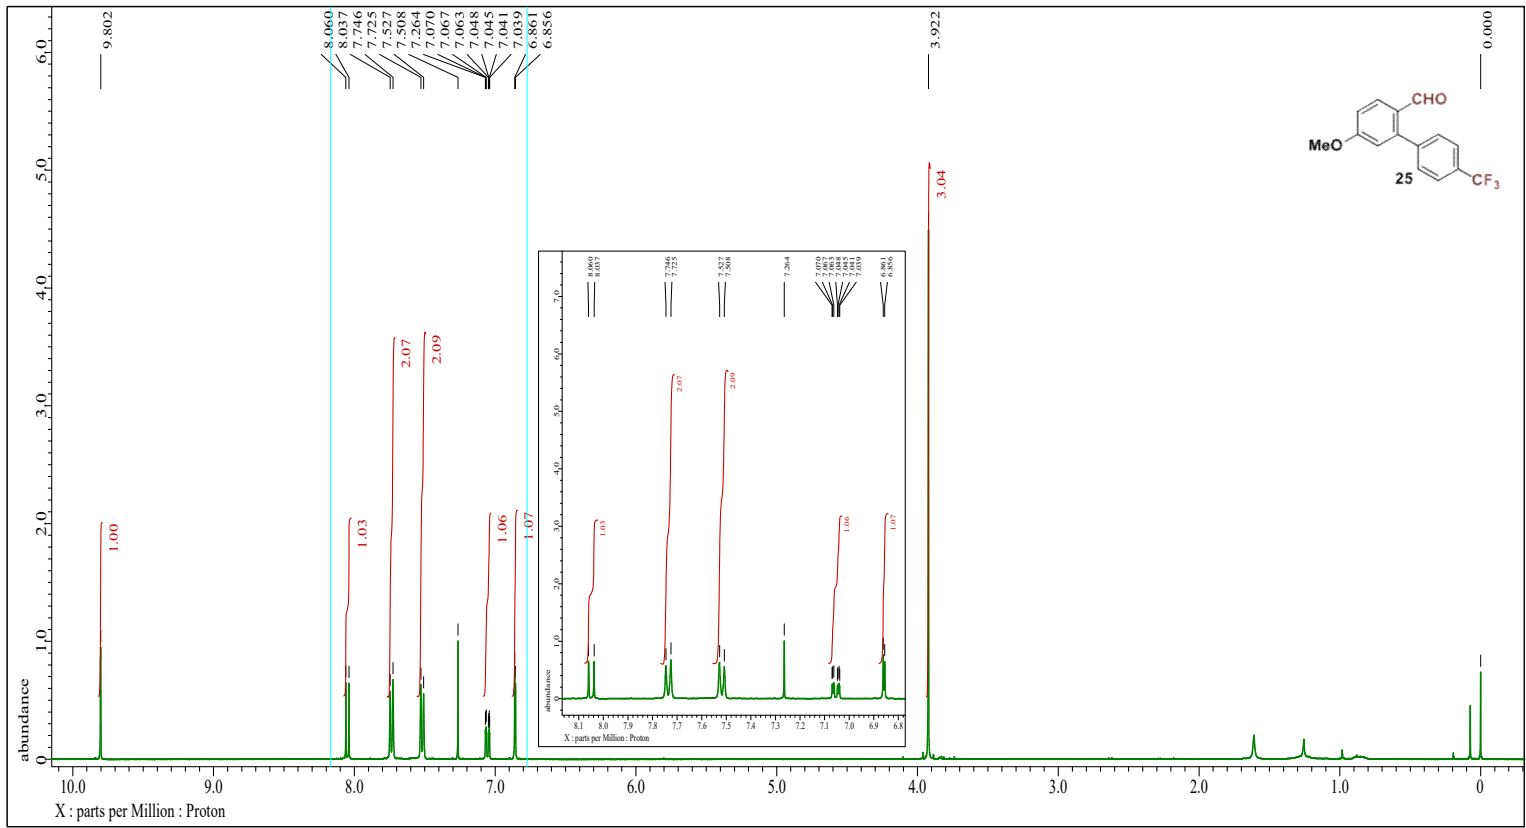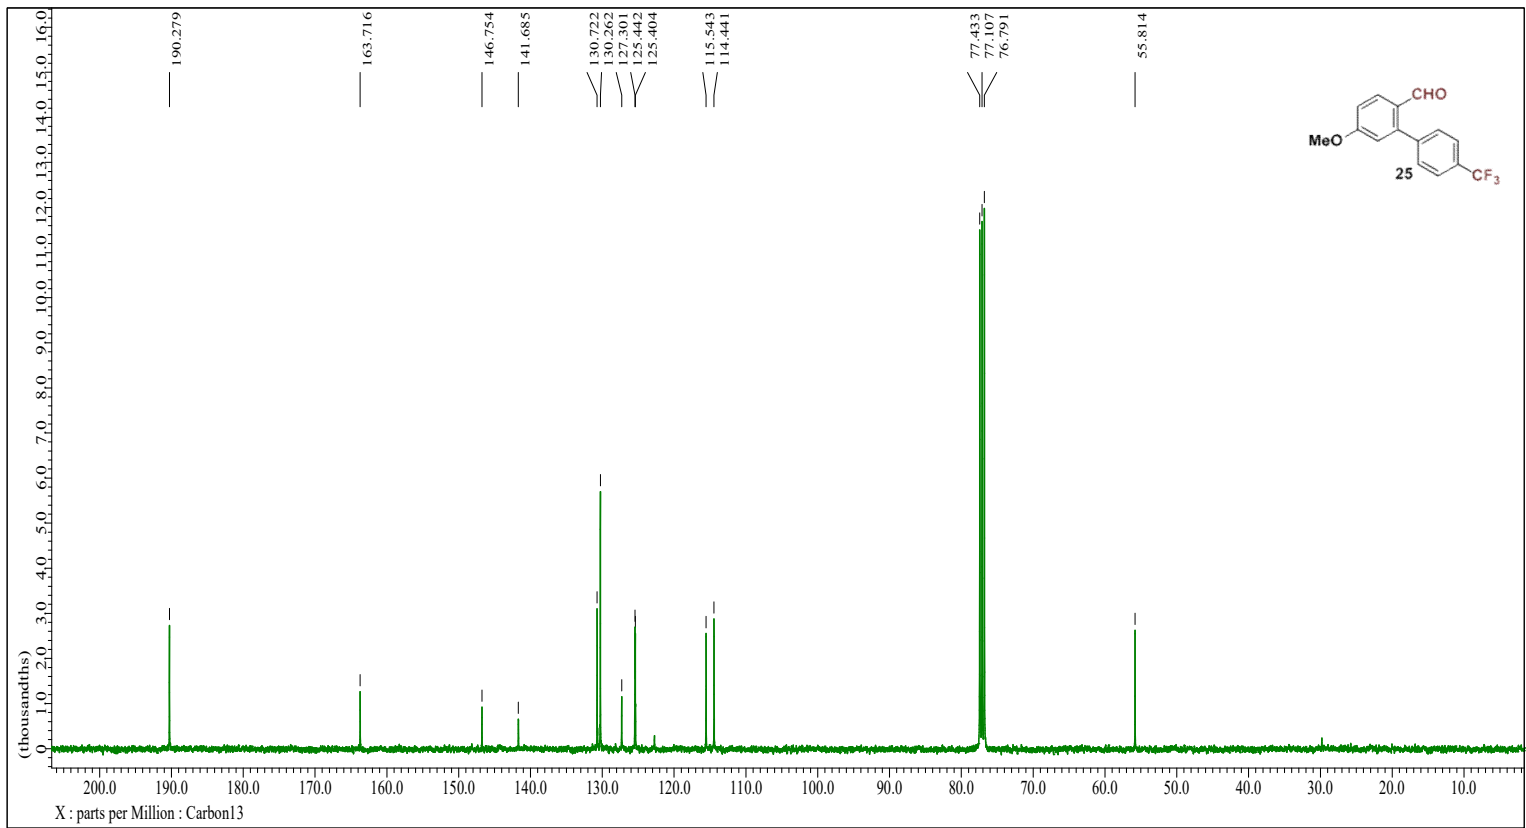

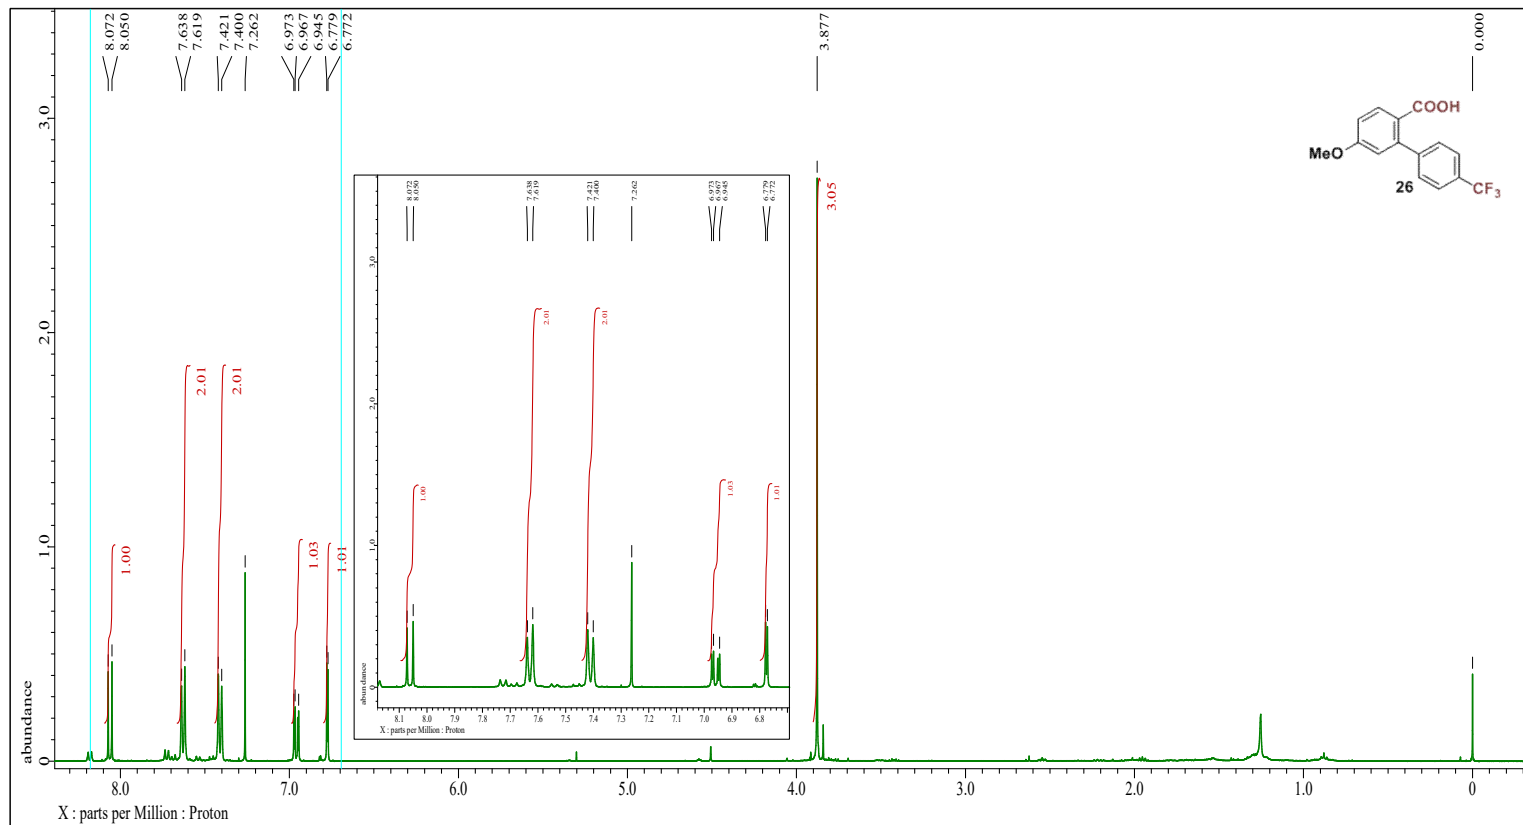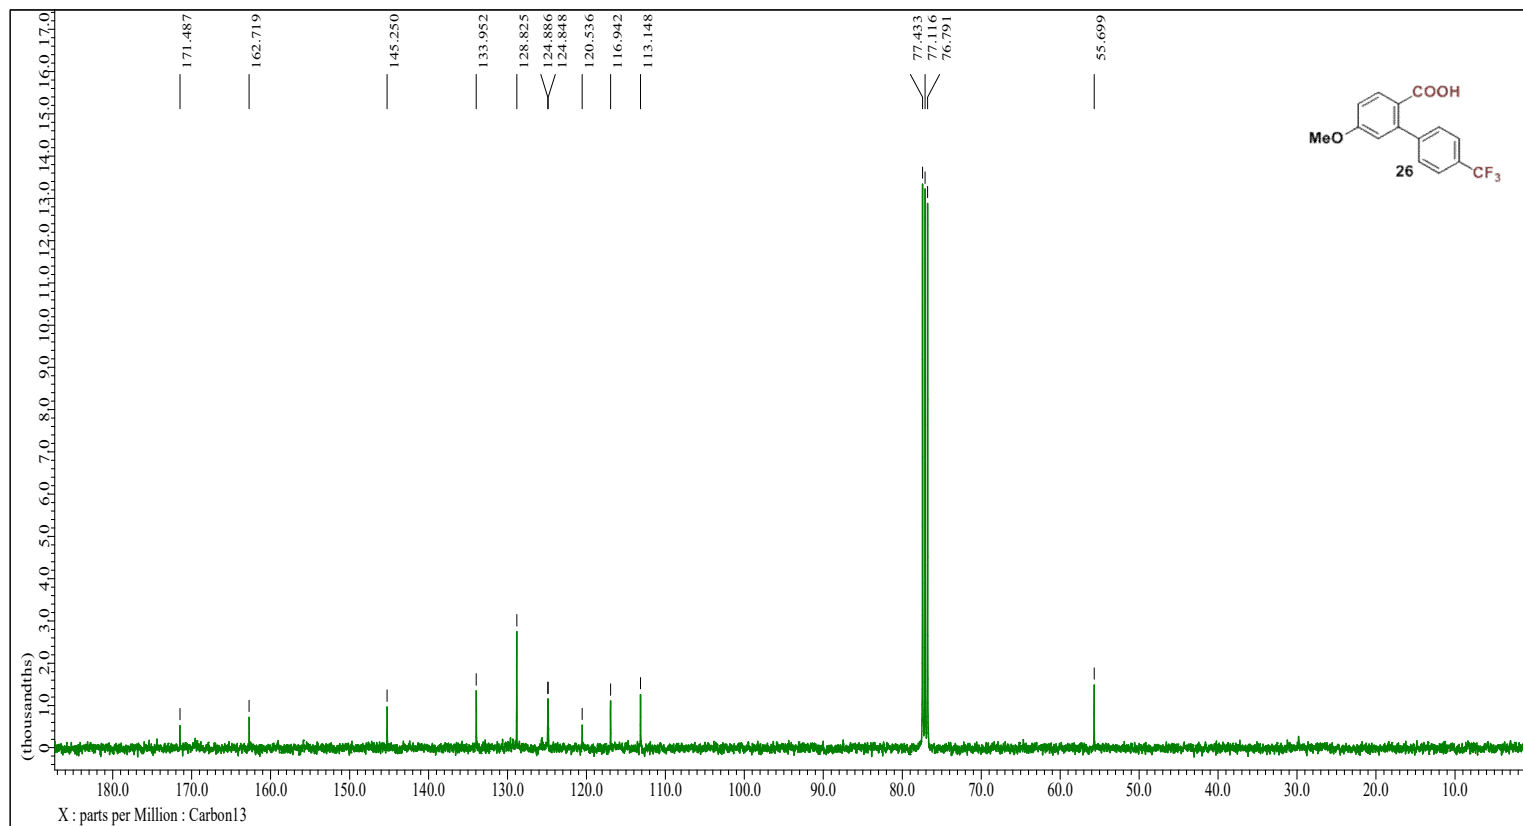

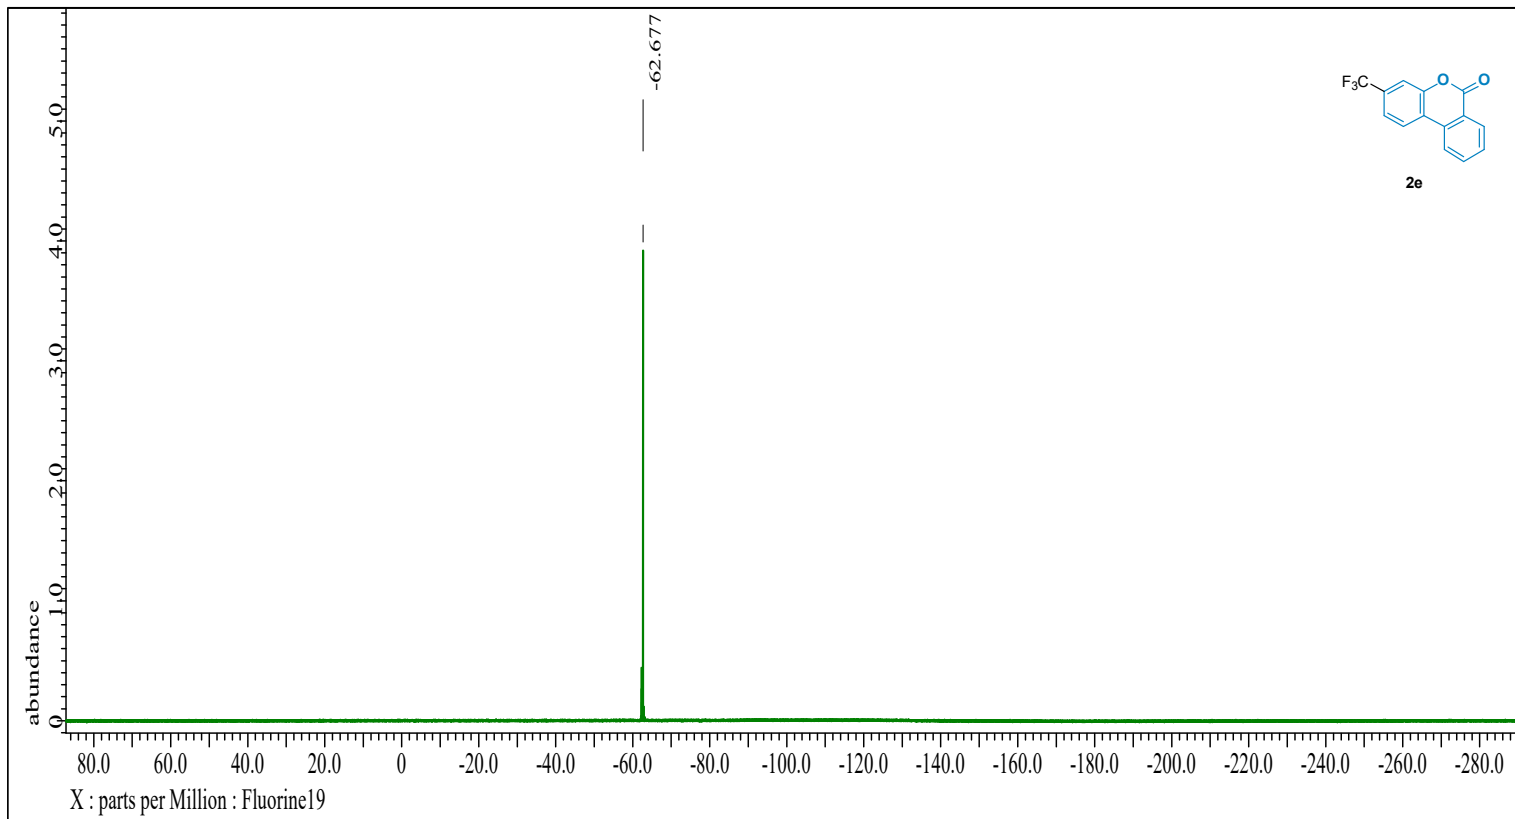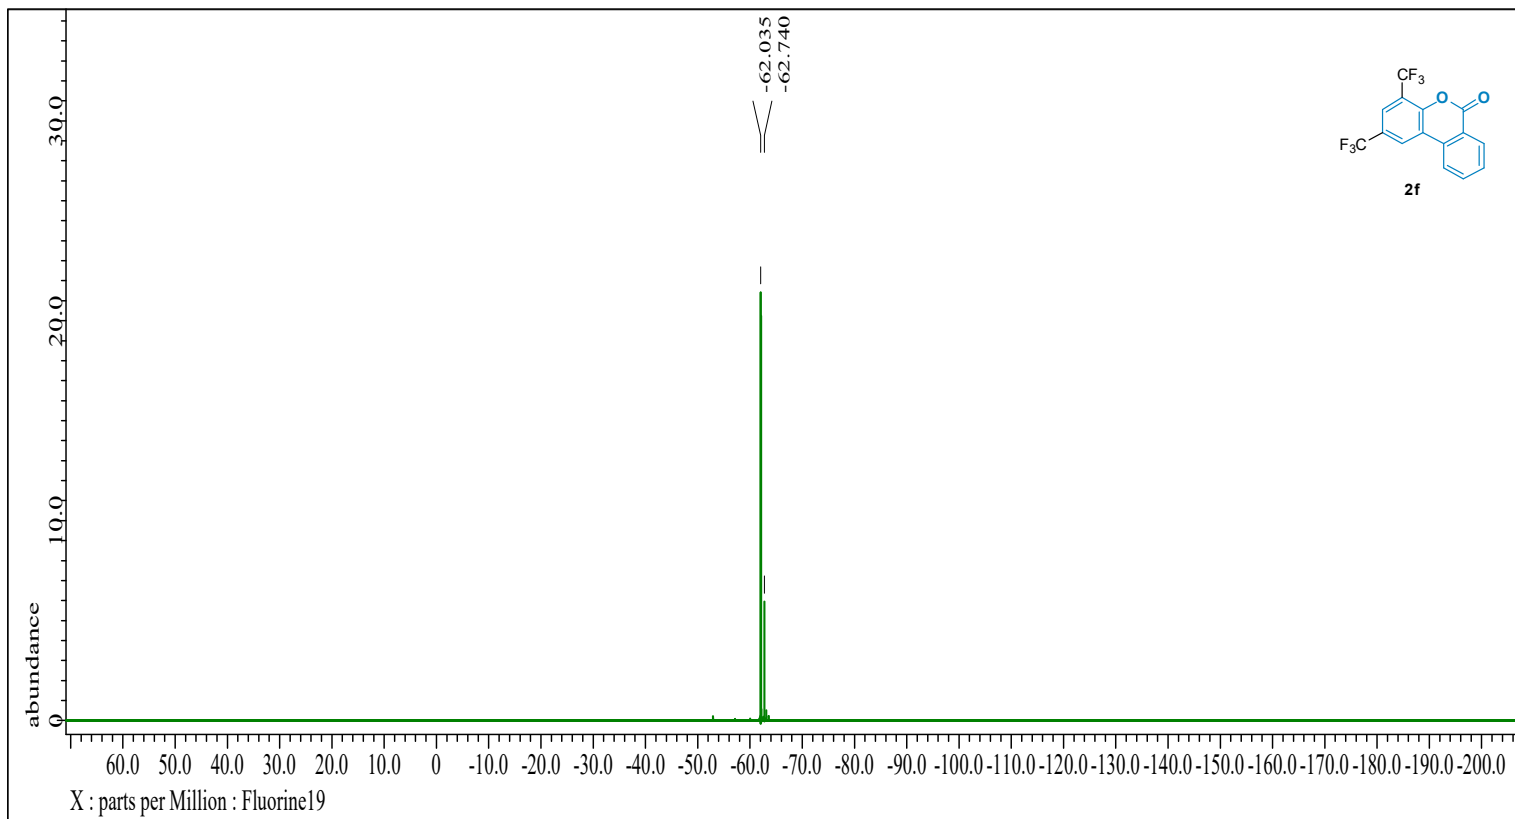

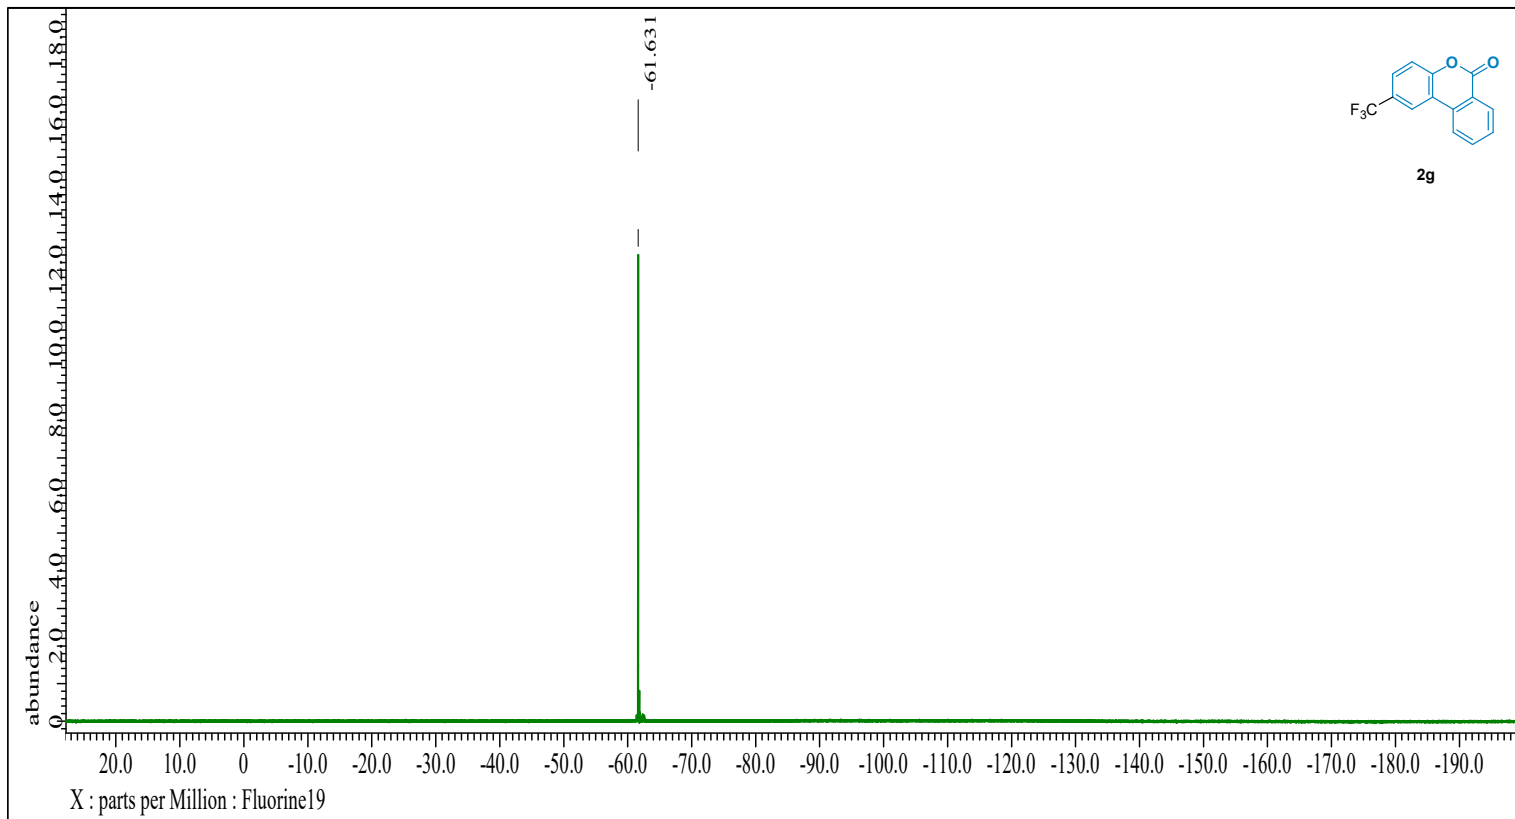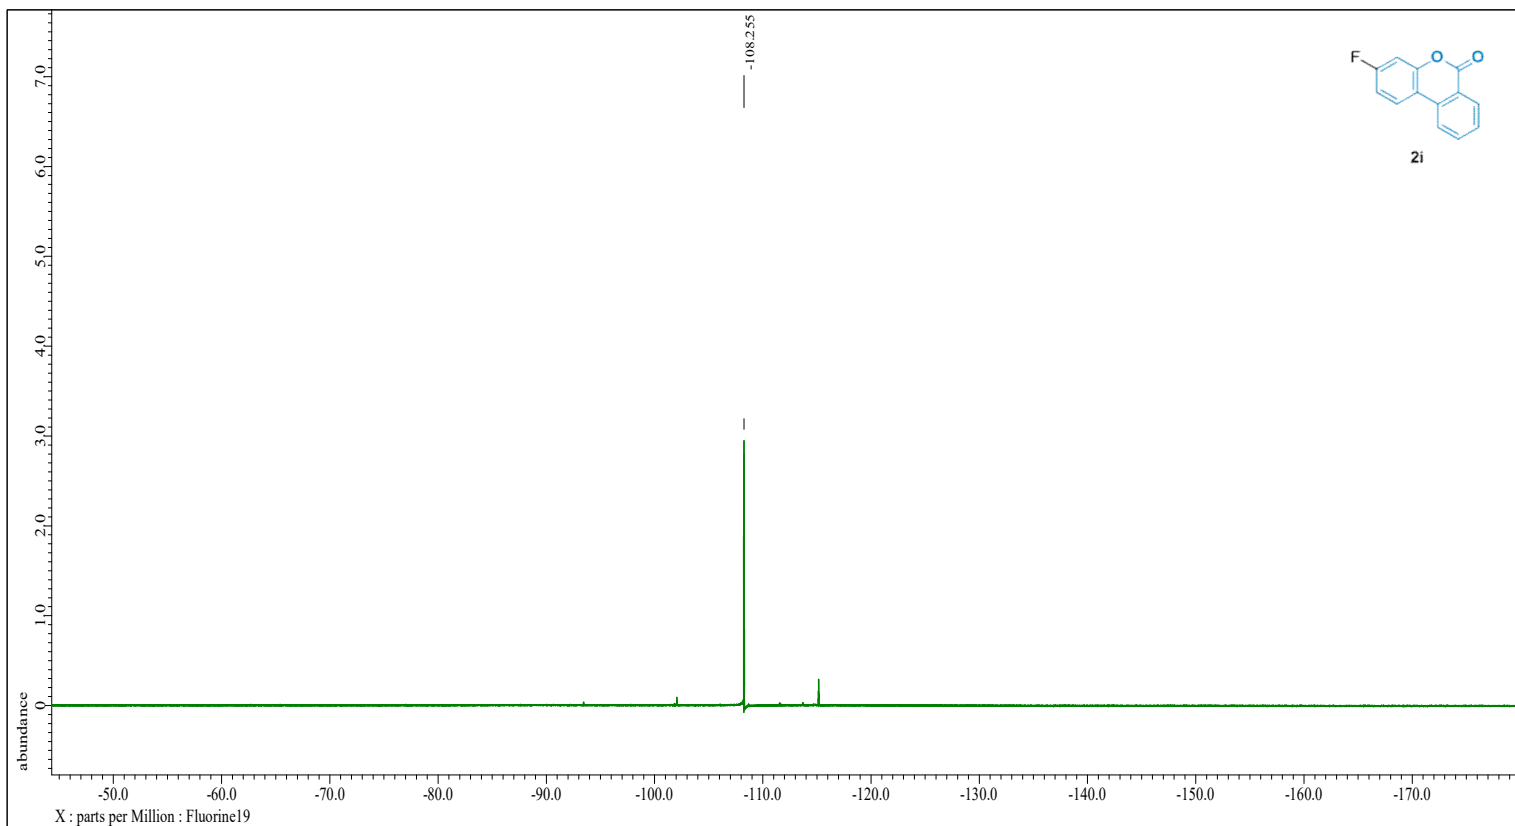



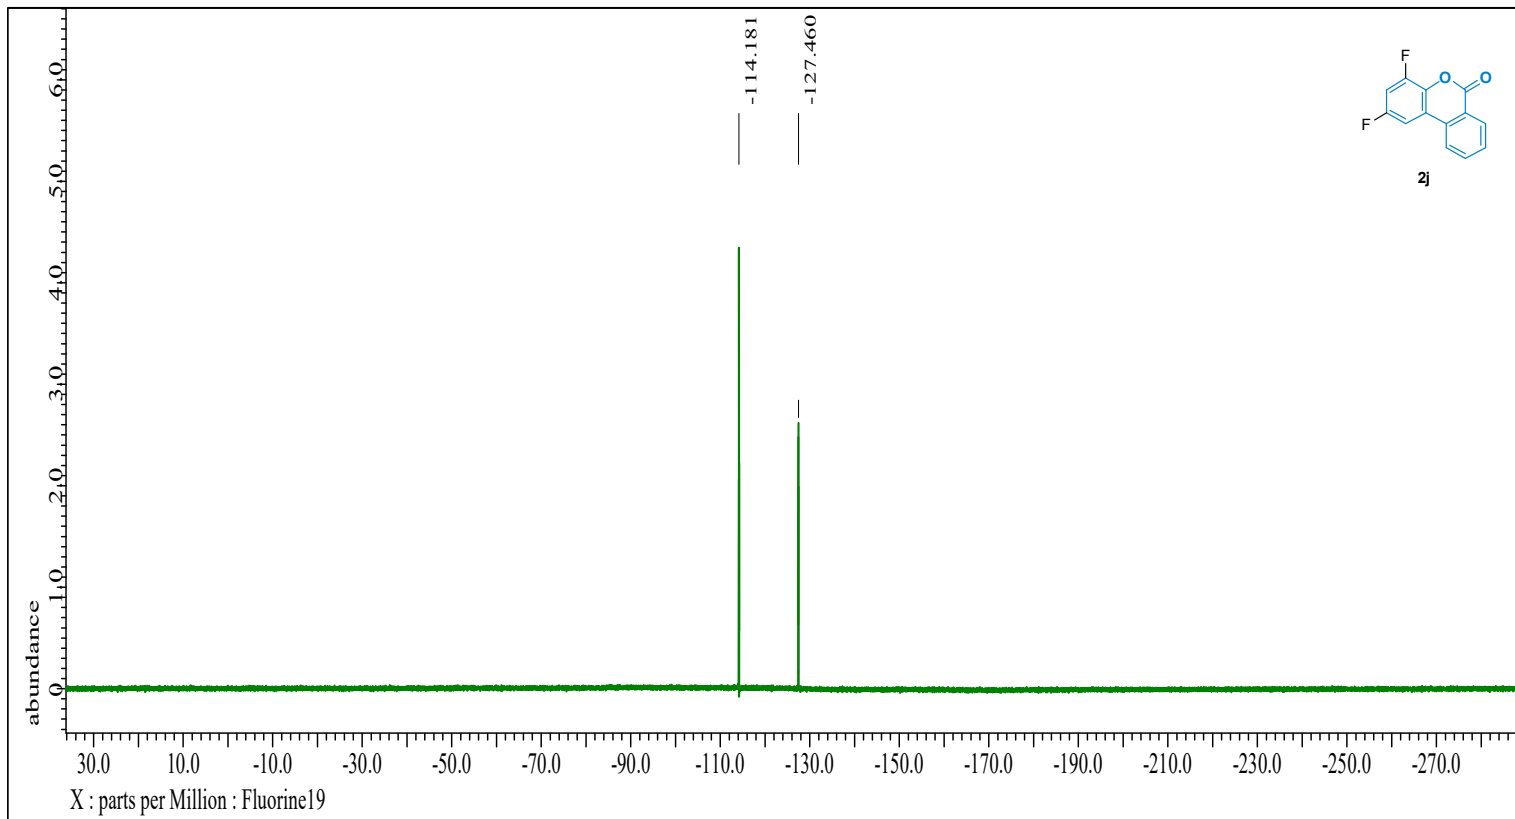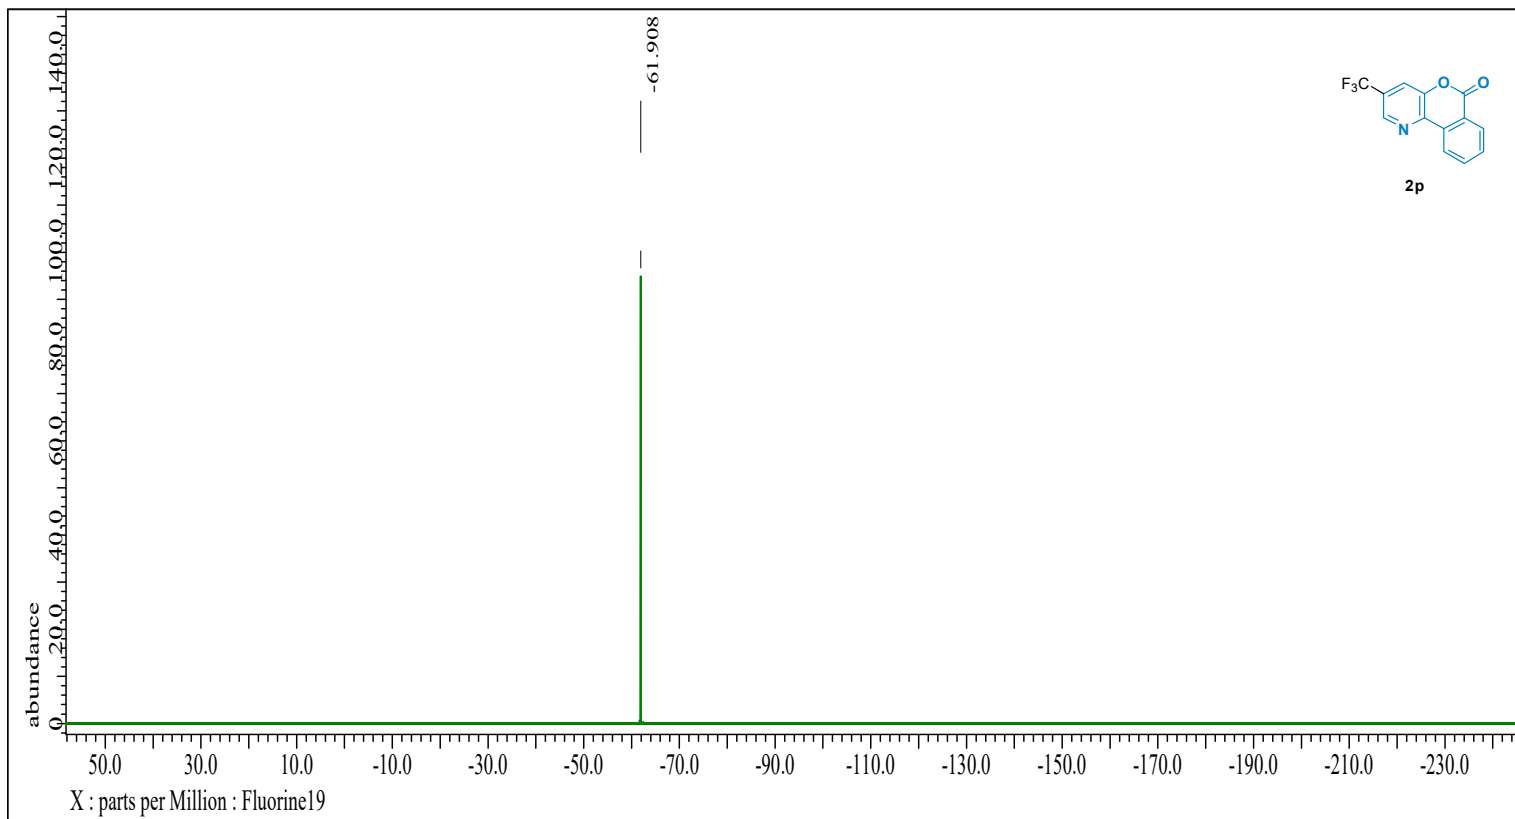

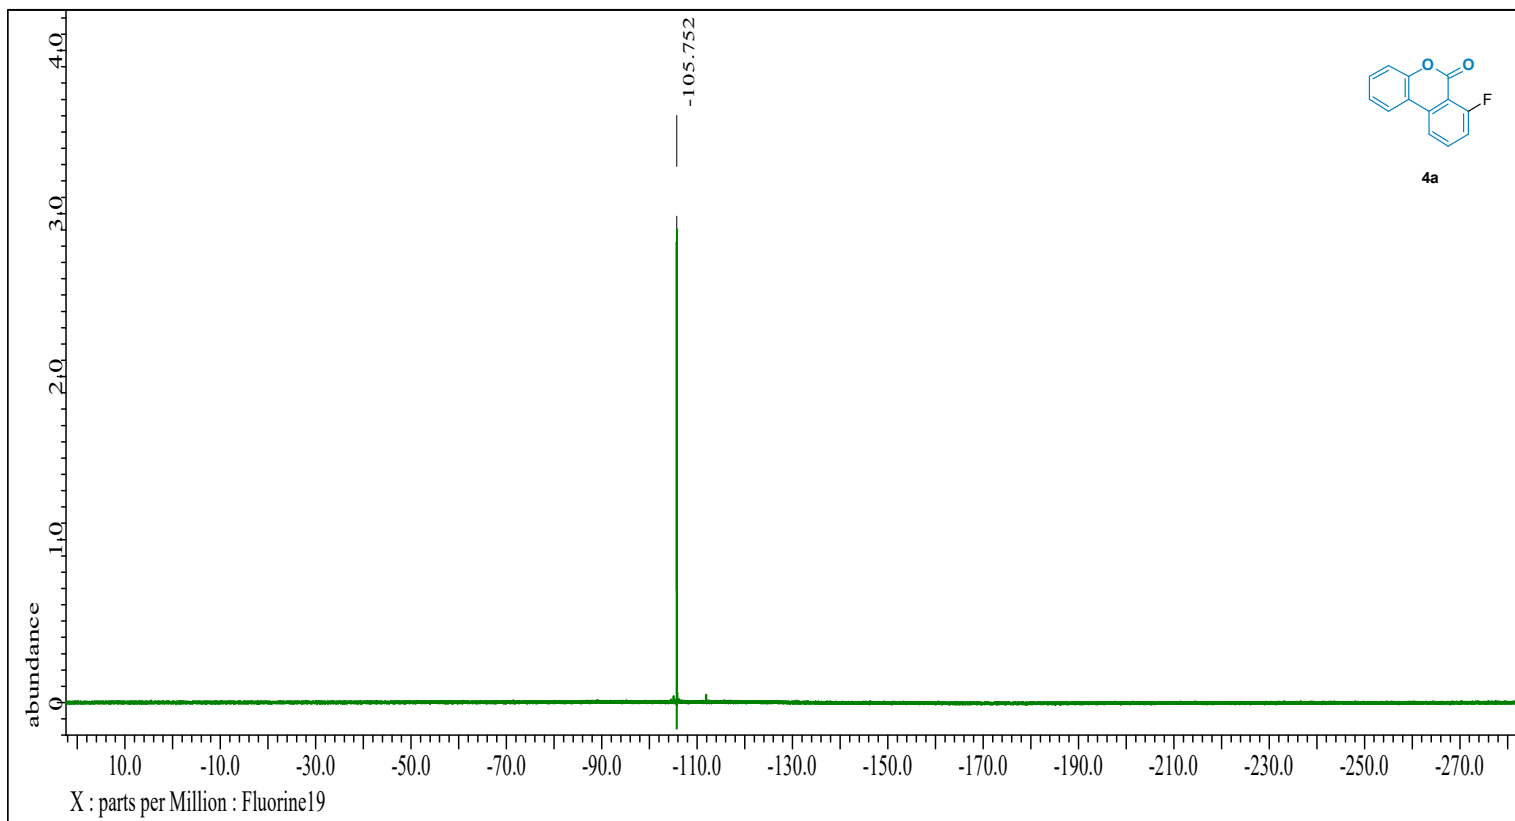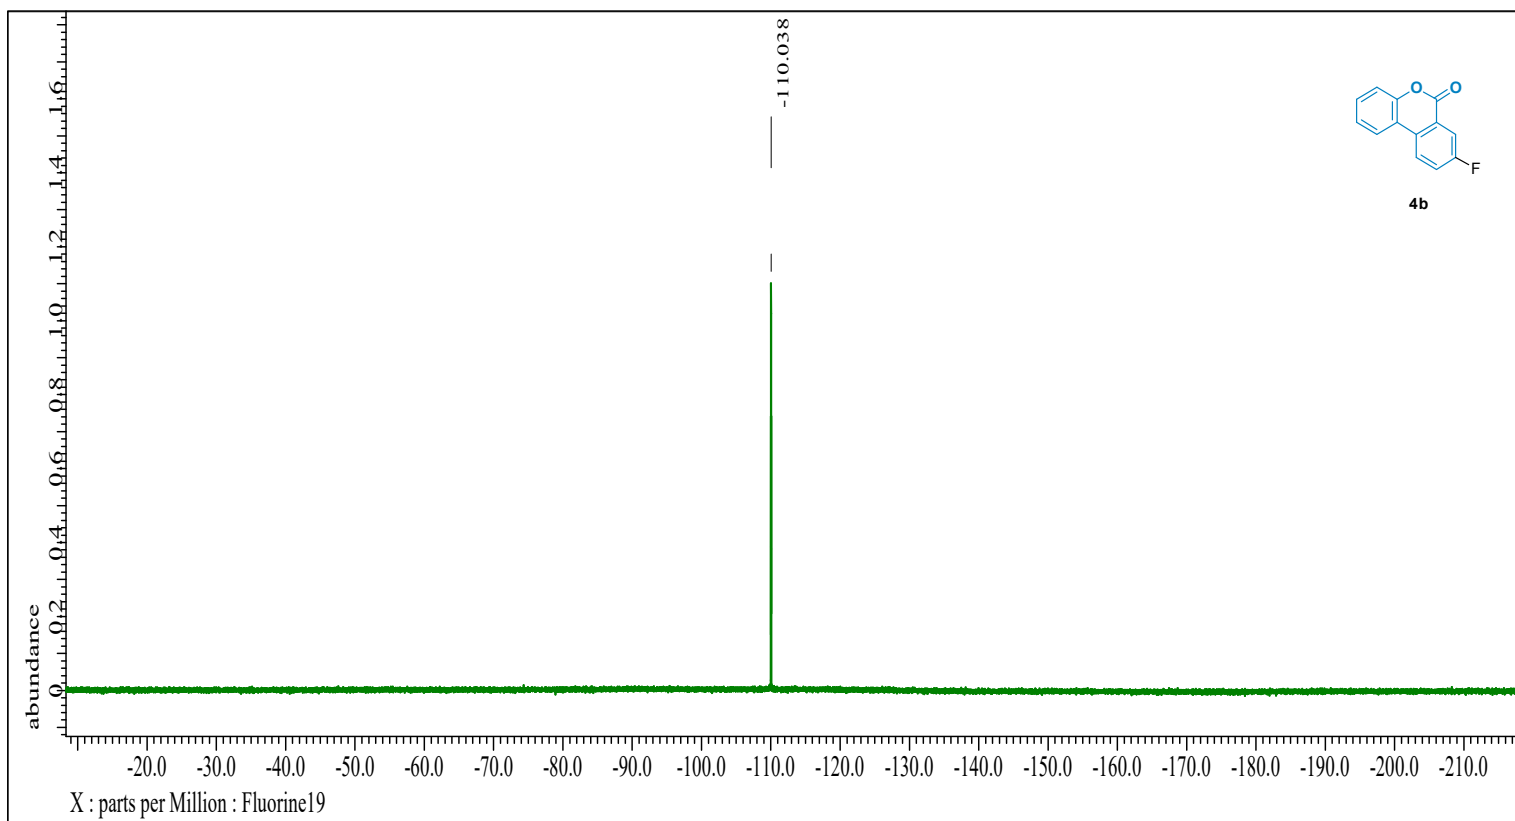

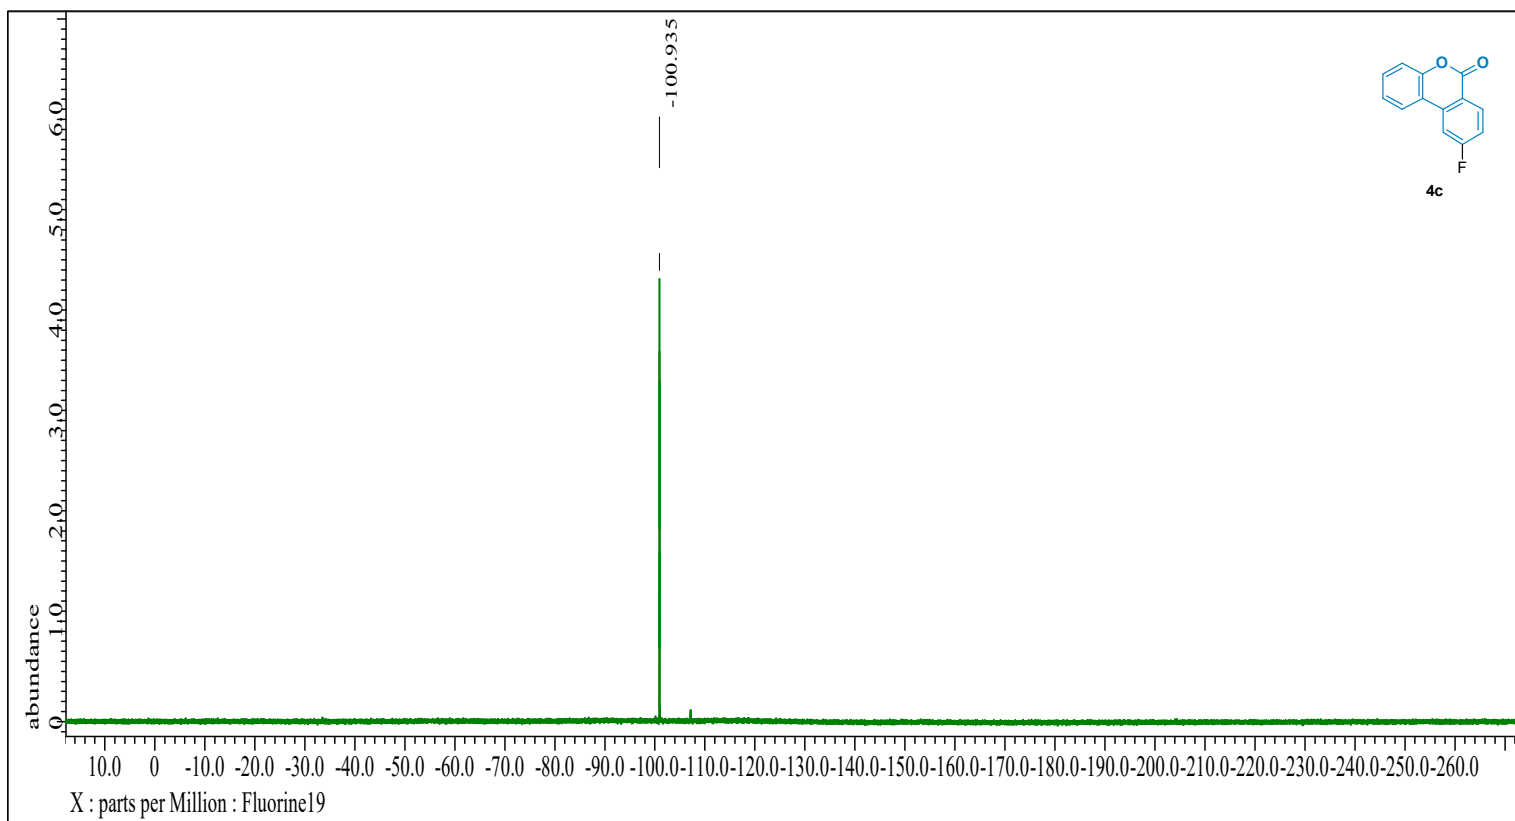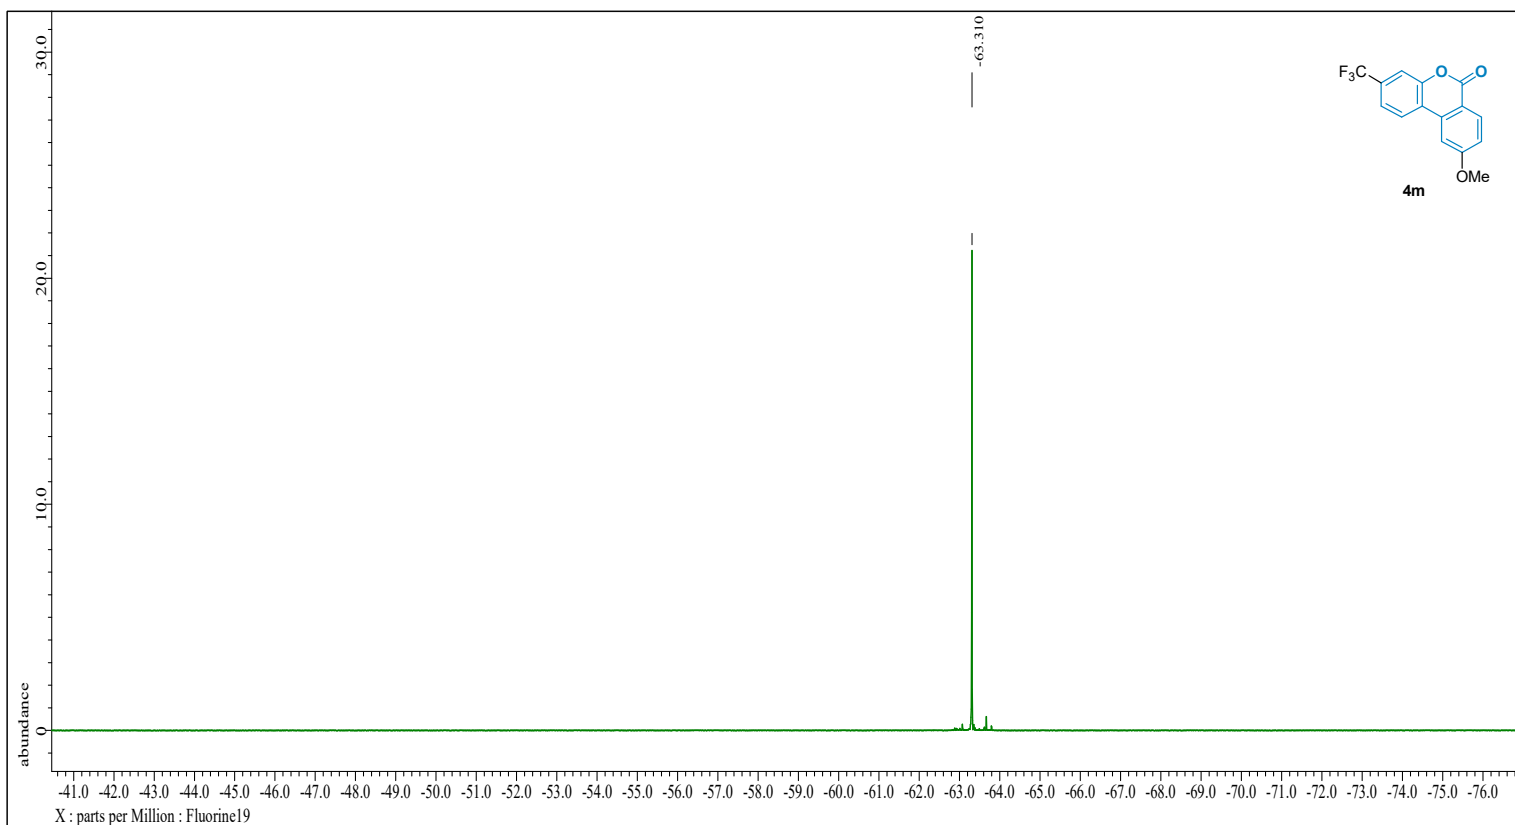

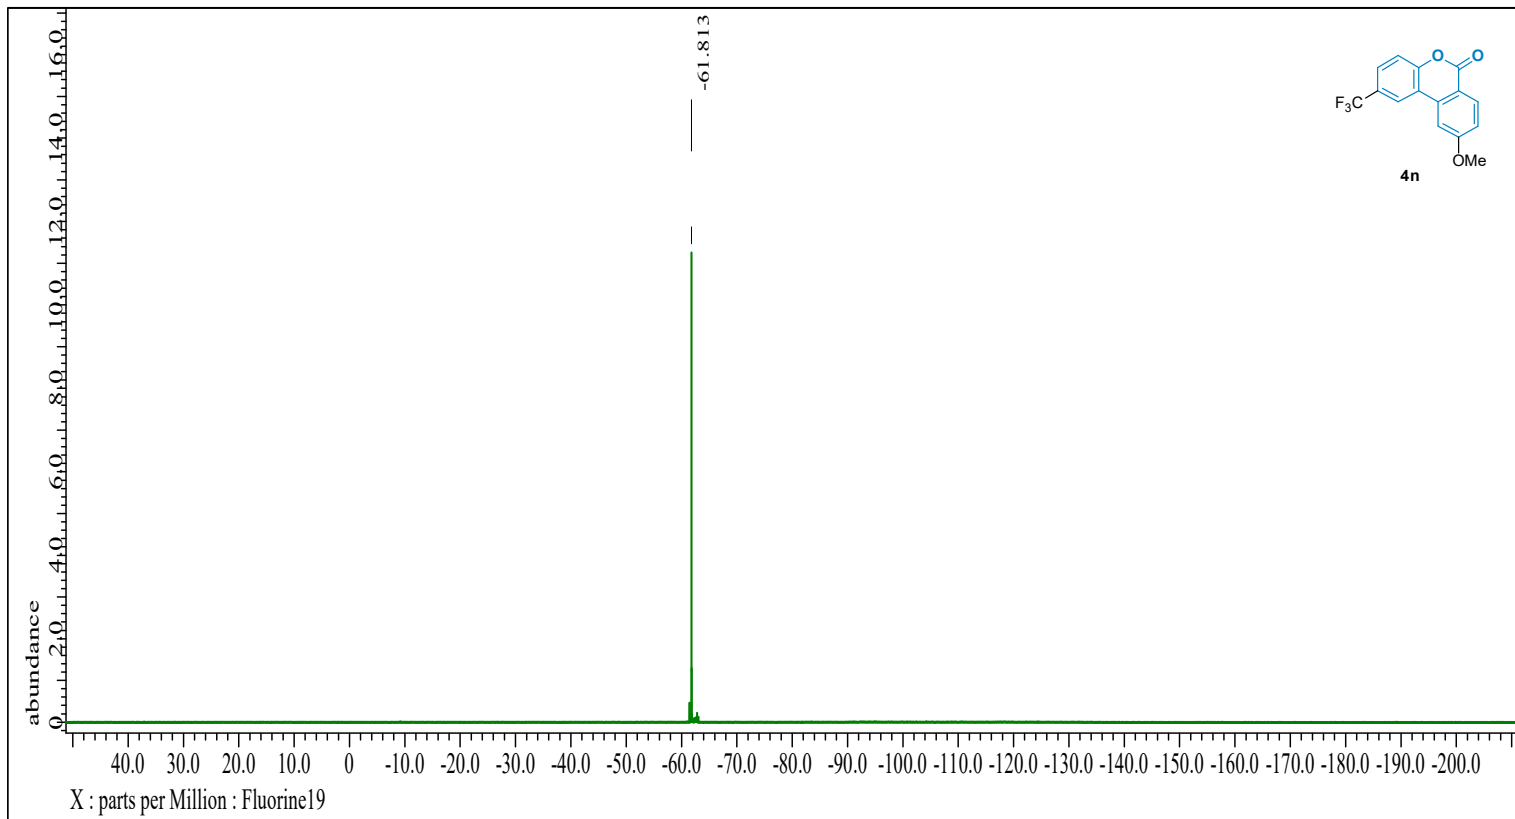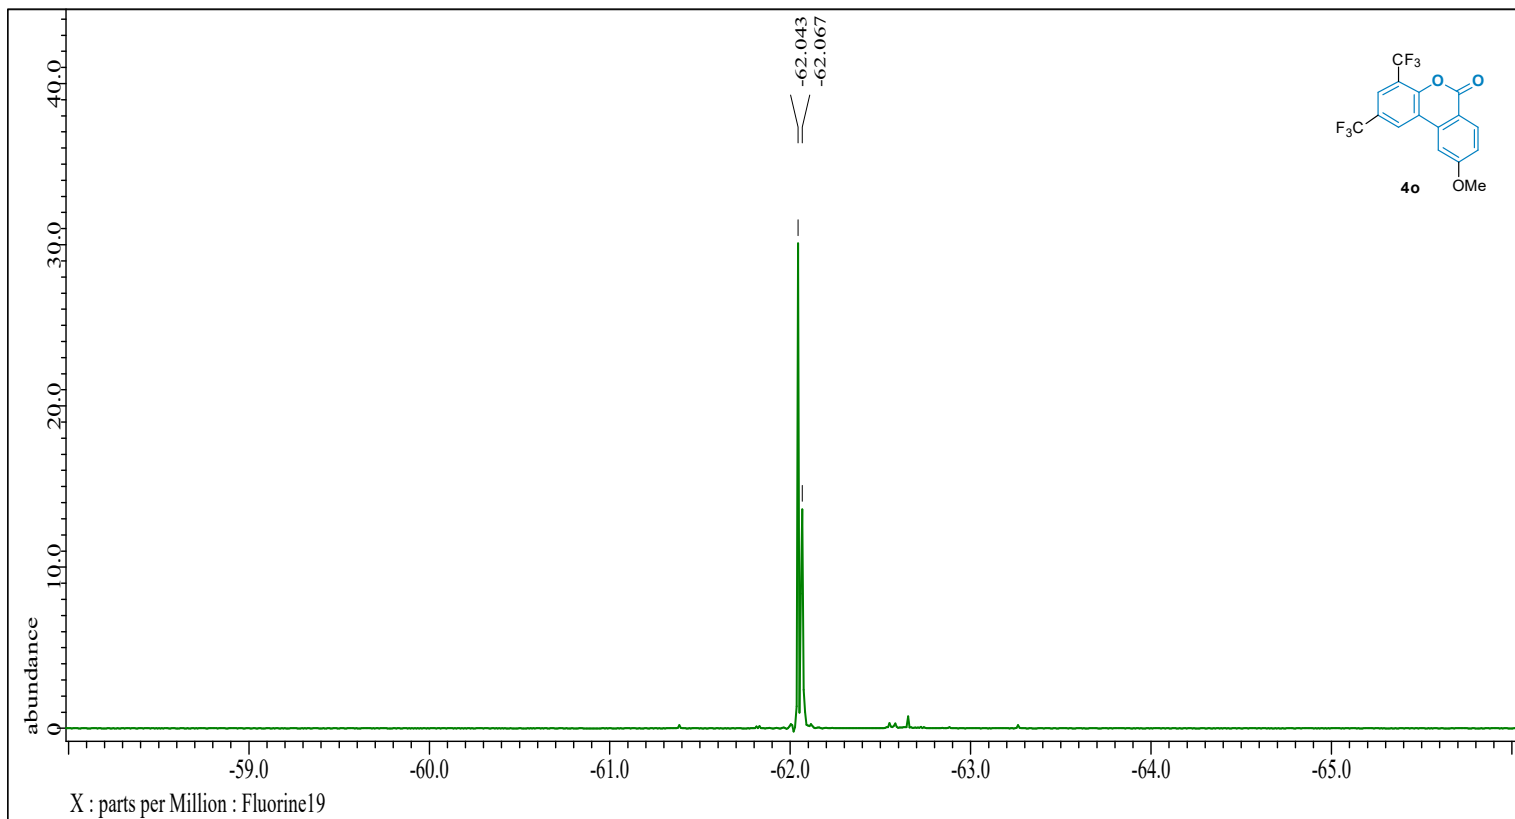

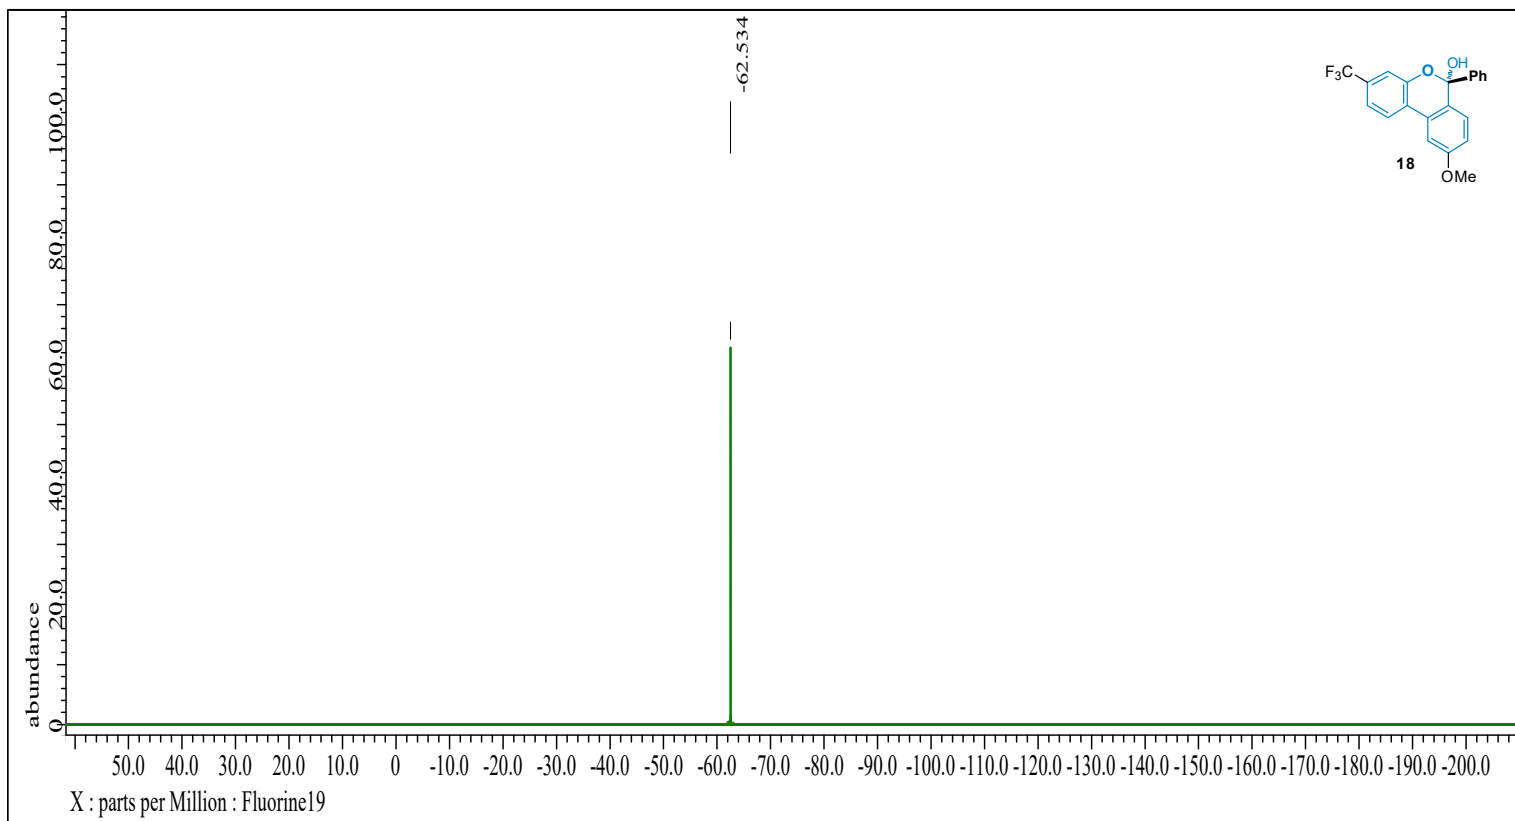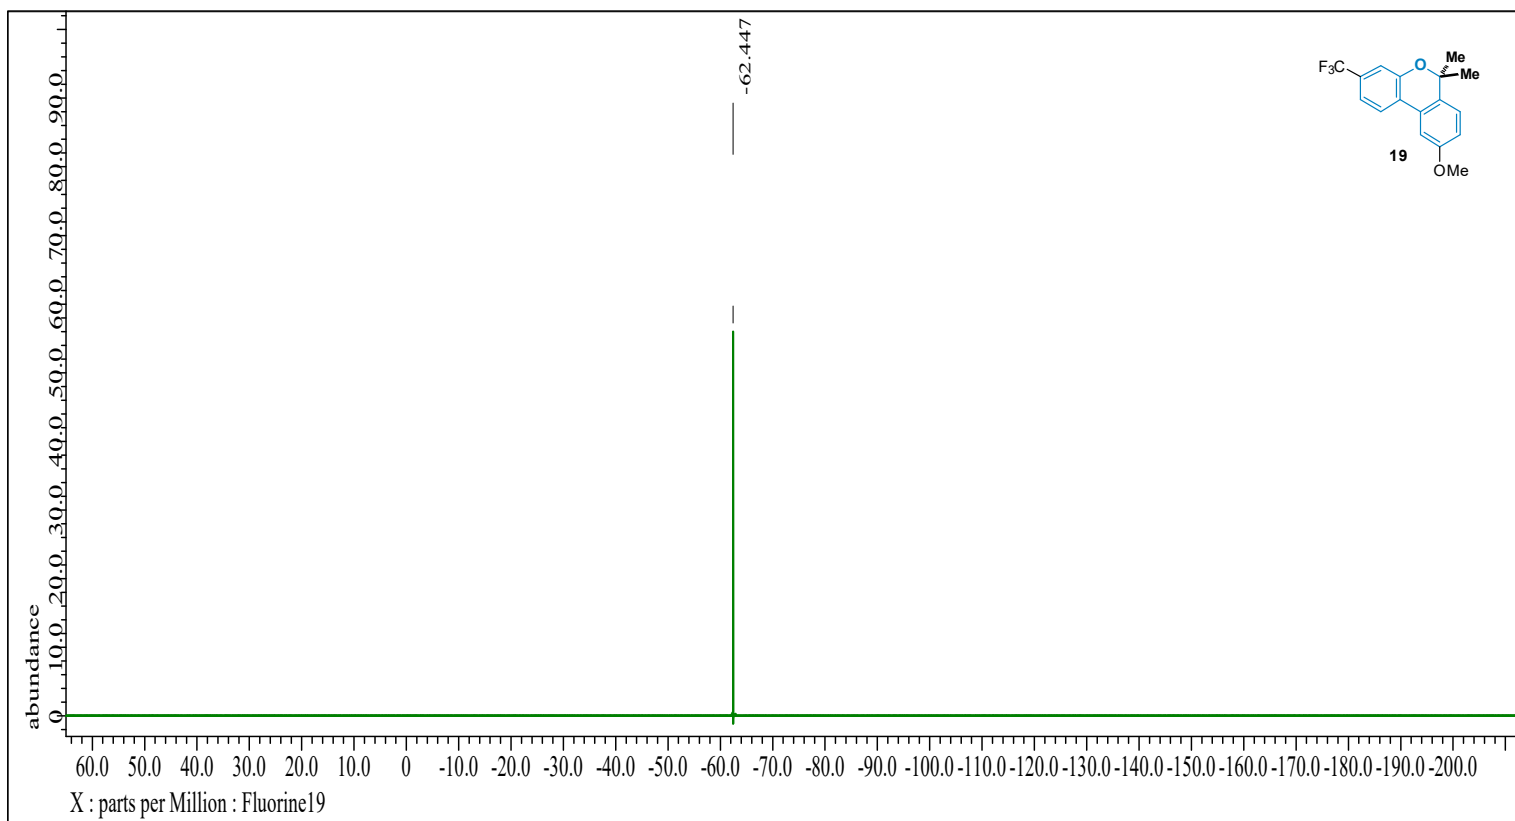

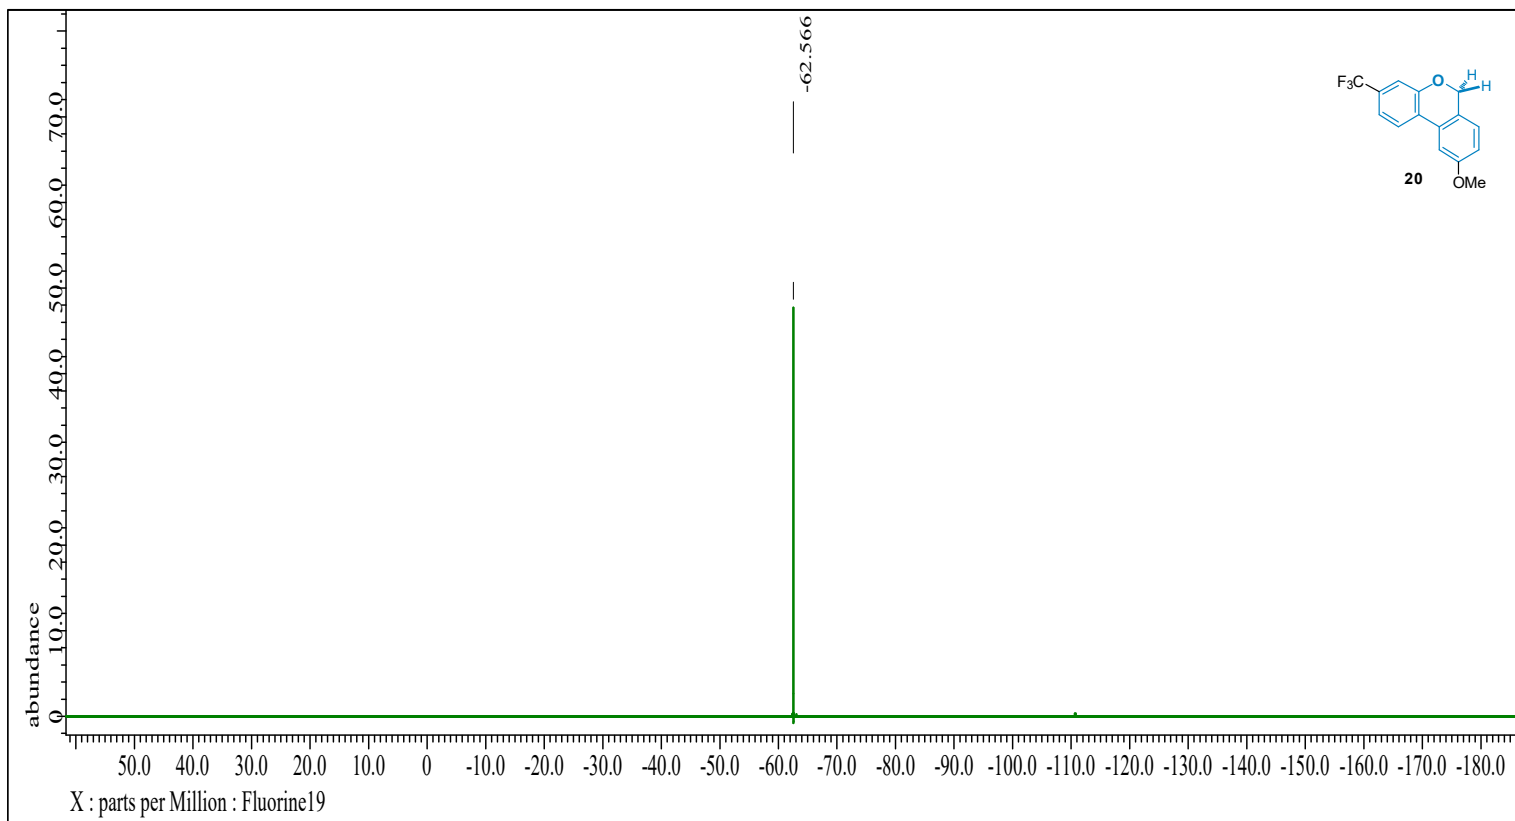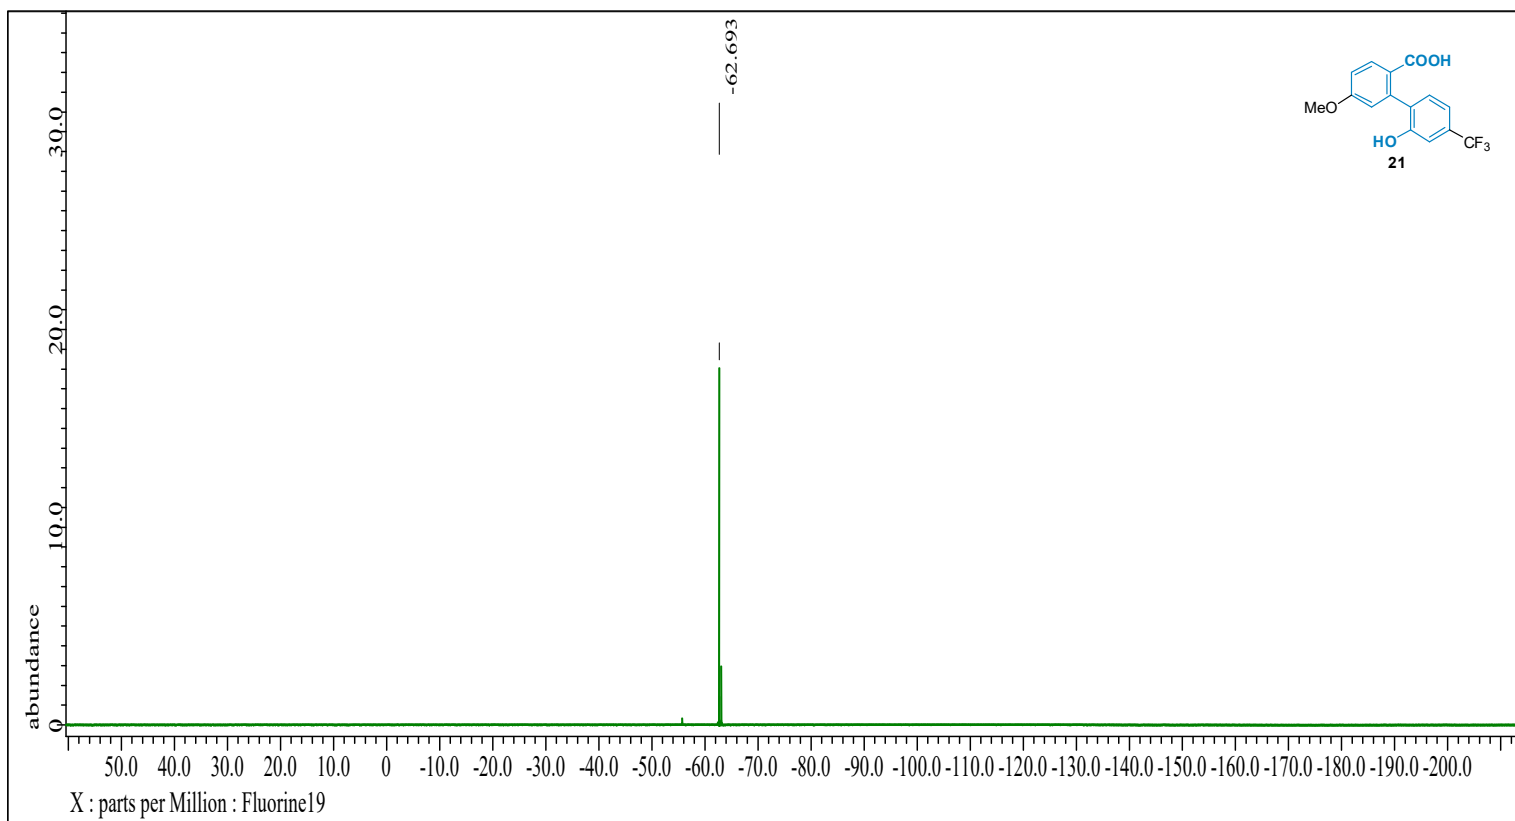

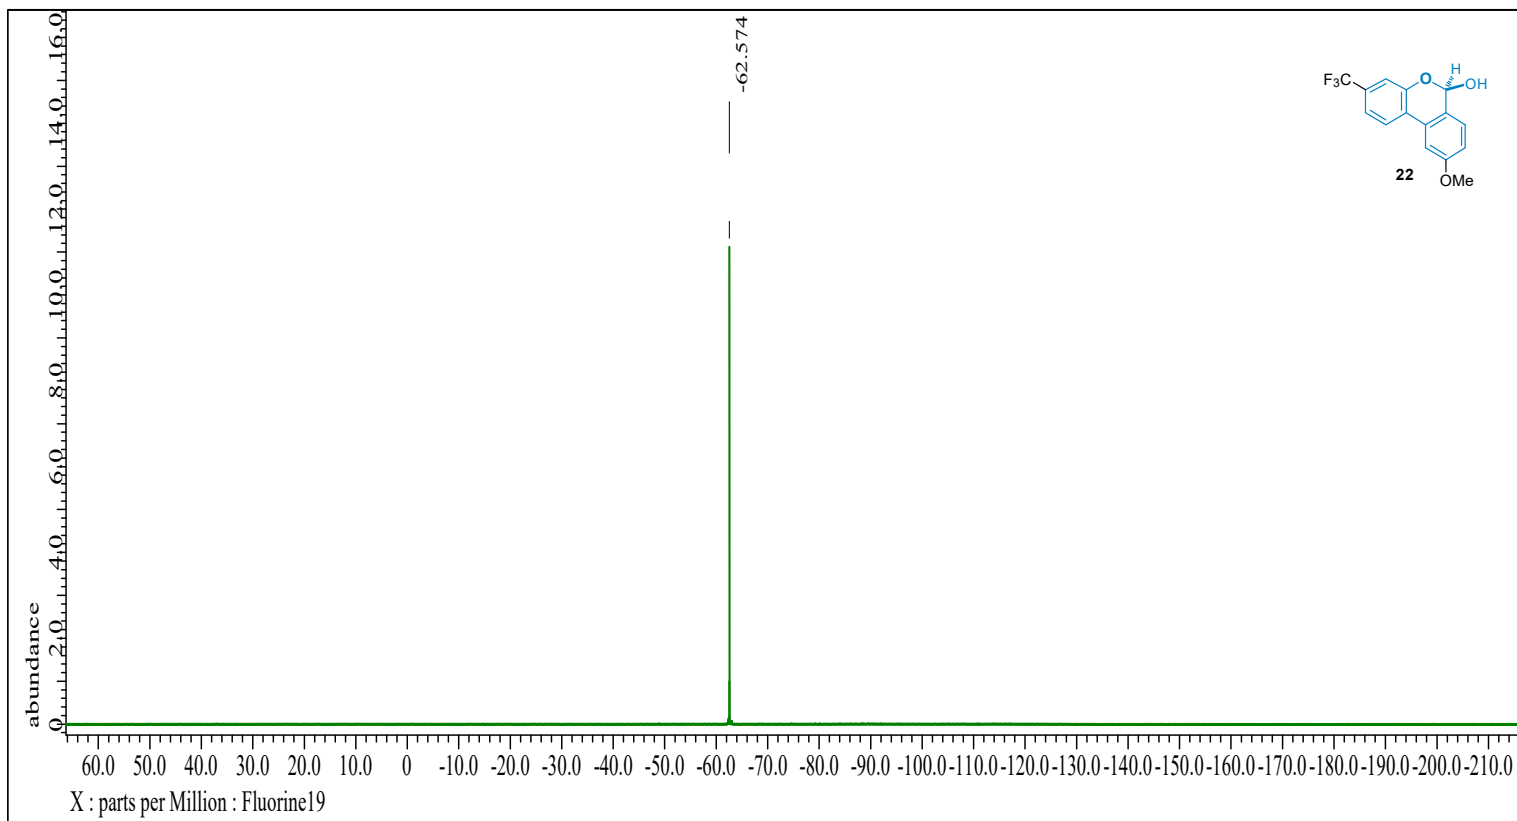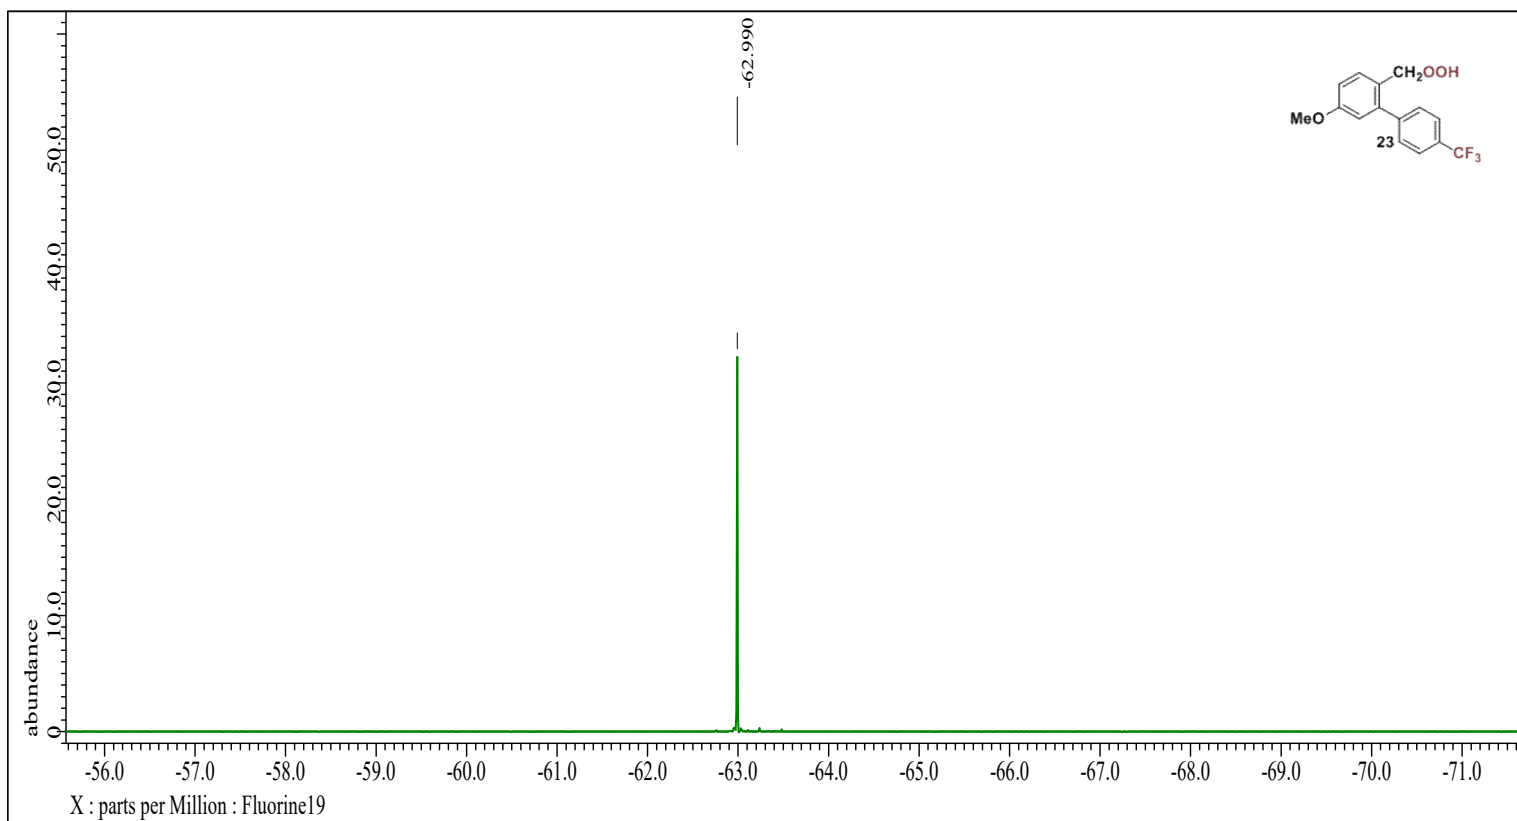

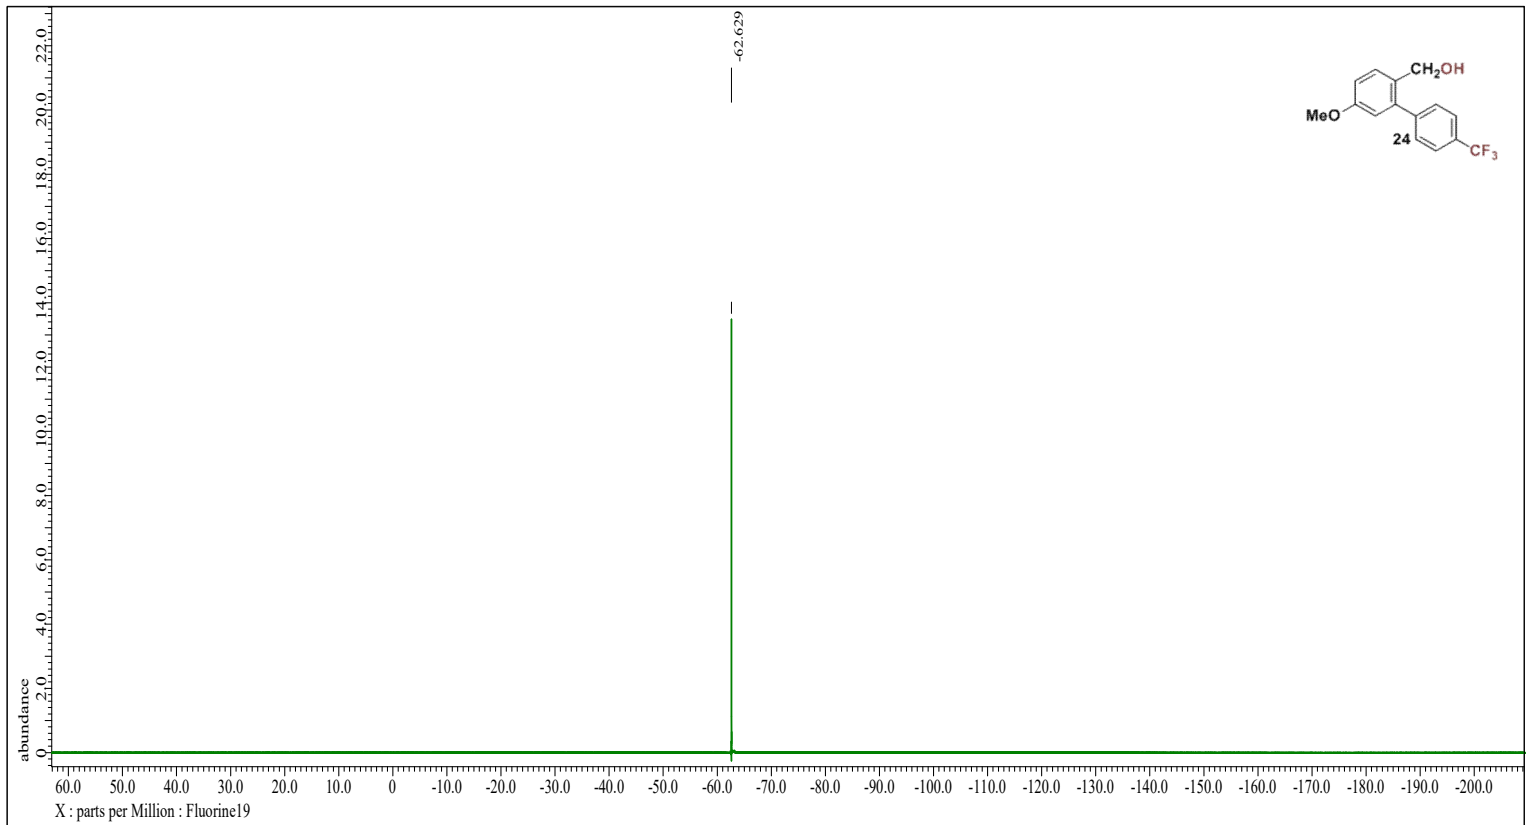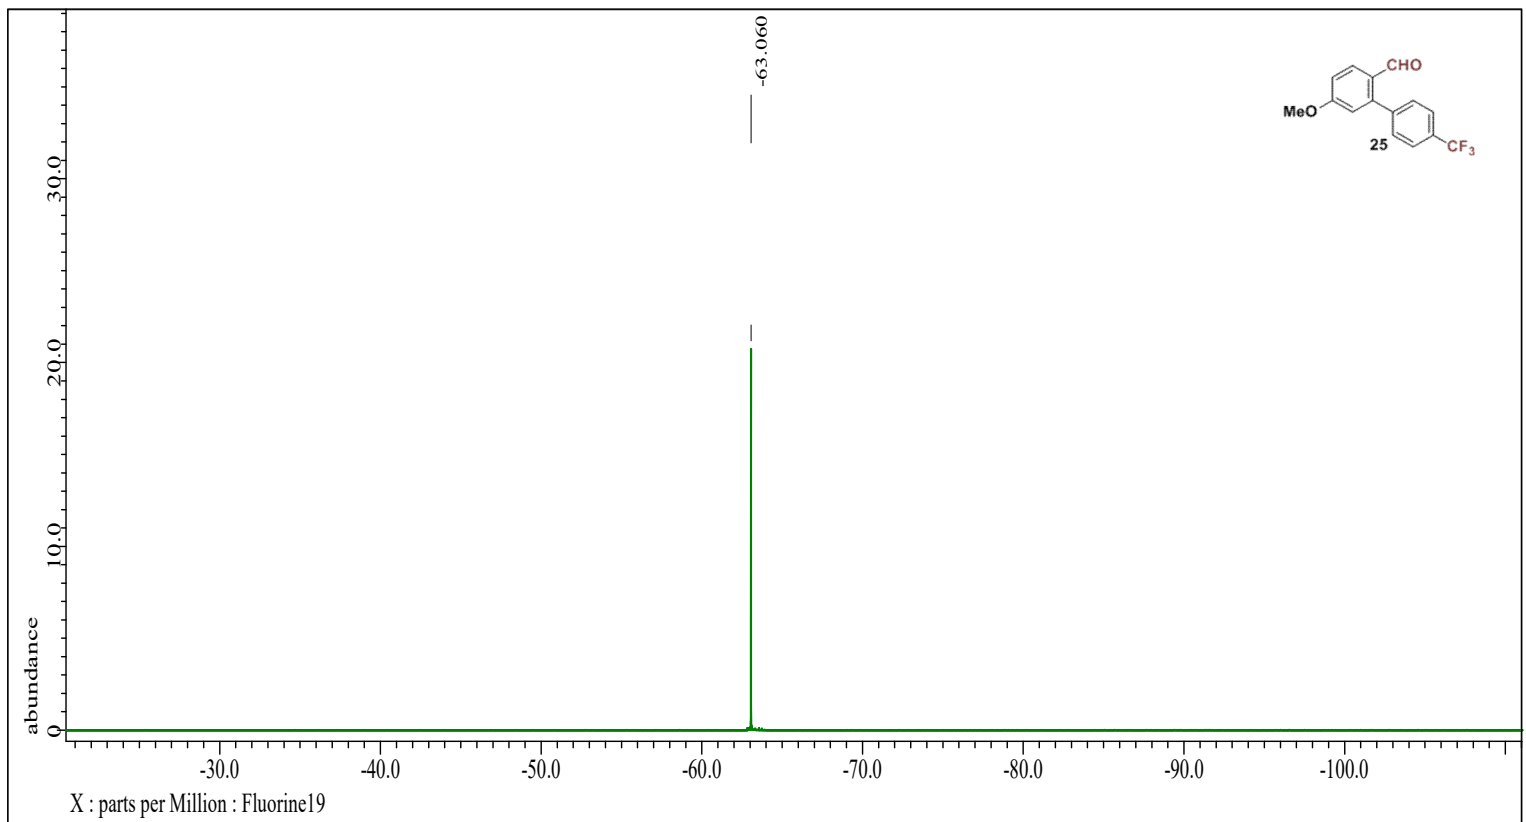



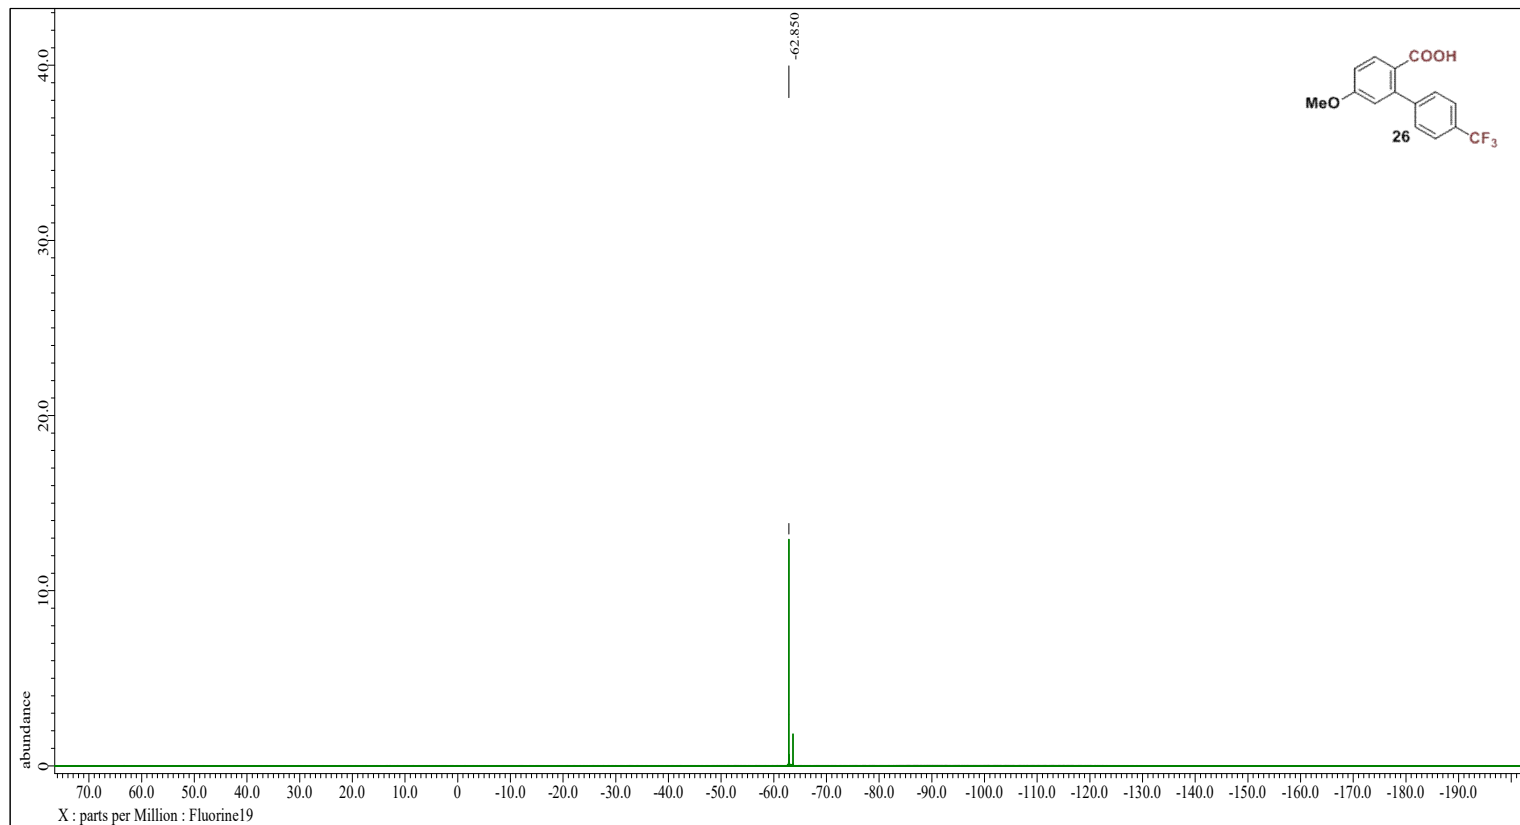

Supplement: d2ob02225g1.pdf [file d2ob02225g1.pdf]
